# Supplementary material for: The NR_109/FUBP1/c-Myc axis regulates TAM polarization and remodels the tumor microenvironment to promote cancer development
Source: HighWire-hosted journal article supplement (doi:10.1136/jitc-2022-006230), 2023-05-01
Supplement: jitc-2022-006230supp001_data_supplement.pdf [file jitc-2022-006230supp001_data_supplement.pdf]

# Supplementary material

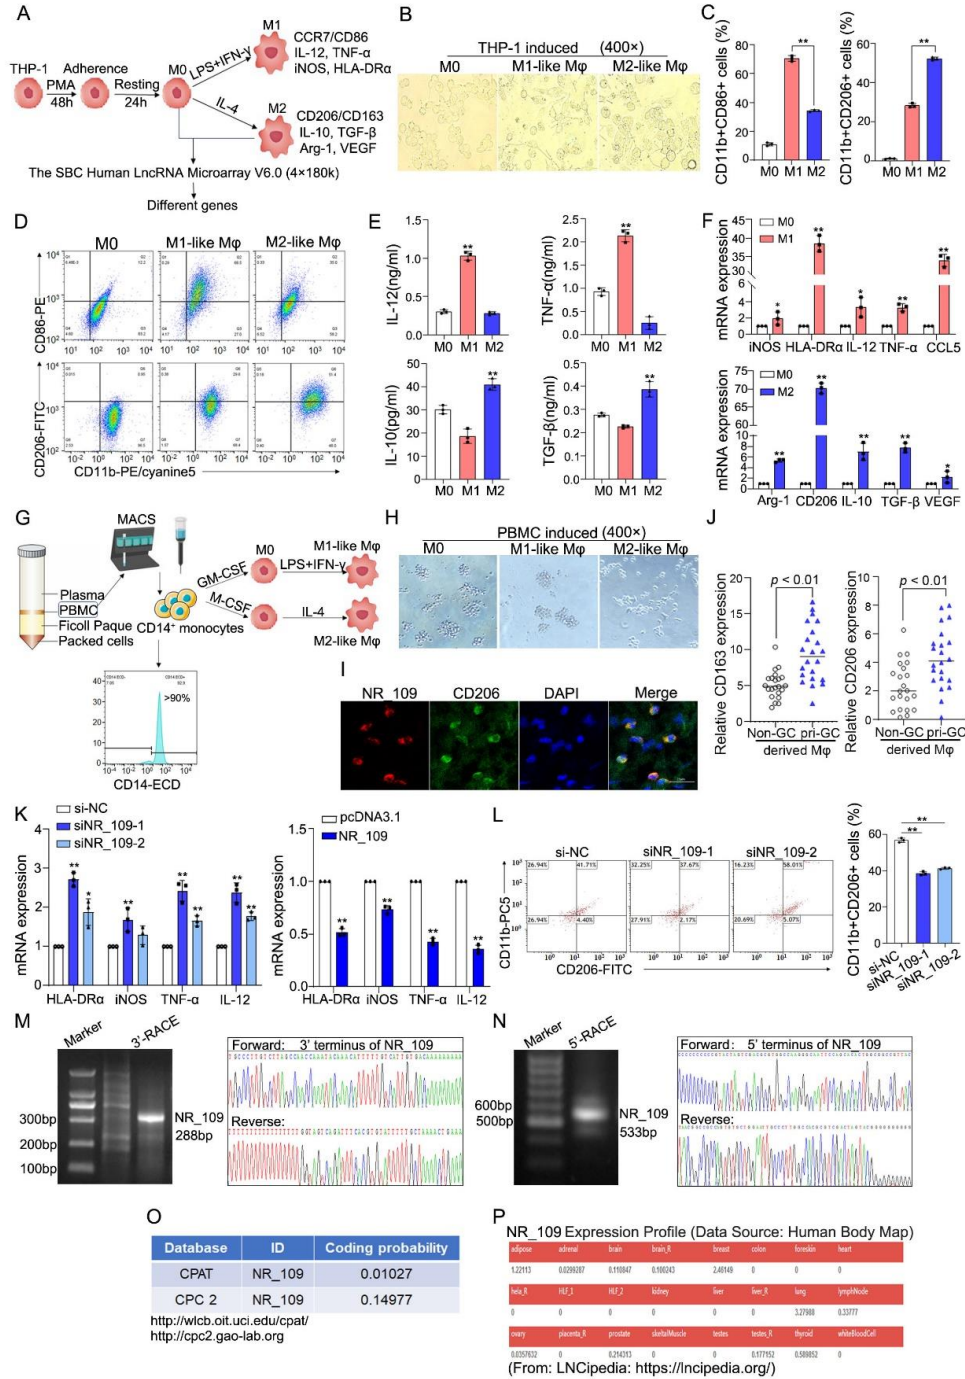

**Figure. S1 The model of M0, M1-like and M2-like macrophages induced by THP-1 cells and PBMC.**

**A.** The procedure and **B.** the morphology of M0, M1-like and M2-like macrophages induced from THP-1 cells. **C-D.** Expression of CD86 and CD206 in M0, M1-like and

M2-like macrophages was measured by FCM. **E.** The level of IL-12, TNF- $\alpha$ , IL-10 and TGF- $\beta$  in the supernatant of M0, M1, and M2-like macrophages was examined by ELISA assays. **F.** Expression of M1-related markers in M1-like macrophages and M2-related markers in M2-like macrophages were analyzed by qPCR. **G.** The procedure and **H.** the morphology of M0, M1-like and M2-like macrophages induced from PBMC. **I.** IF combined with FISH assays showed that NR\_109 was expressed in CD206<sup>+</sup> TAMs of GC tissues. **J.** Expression of CD163 and CD206 in TAMs isolated from the primary GC tissues (pri-GC) and the matched adjacent non neoplastic tissues (non-GC) was measured using qPCR. **K.** Expression of M1-related markers in M2-NR\_109<sup>low</sup> cells and M2-NR\_109<sup>high</sup> cells was tested by qPCR. **L.** Expression of CD206 in THP-1 induced M2-NR\_109<sup>low</sup> cells was measured using FCM. **M.** The 3' and **N.** 5' RACE assays of NR\_109 in THP-1 induced M2-like macrophages. **O.** The CPAT and CPC 2 database showed that NR\_109 has barely any coding probability. **P.** The NONCODE database showed the distribution of NR\_109 in human body. The statistical data are from three independent experiments and the bar indicates the SD values (\* $p < 0.05$ , \*\* $p < 0.01$ ).

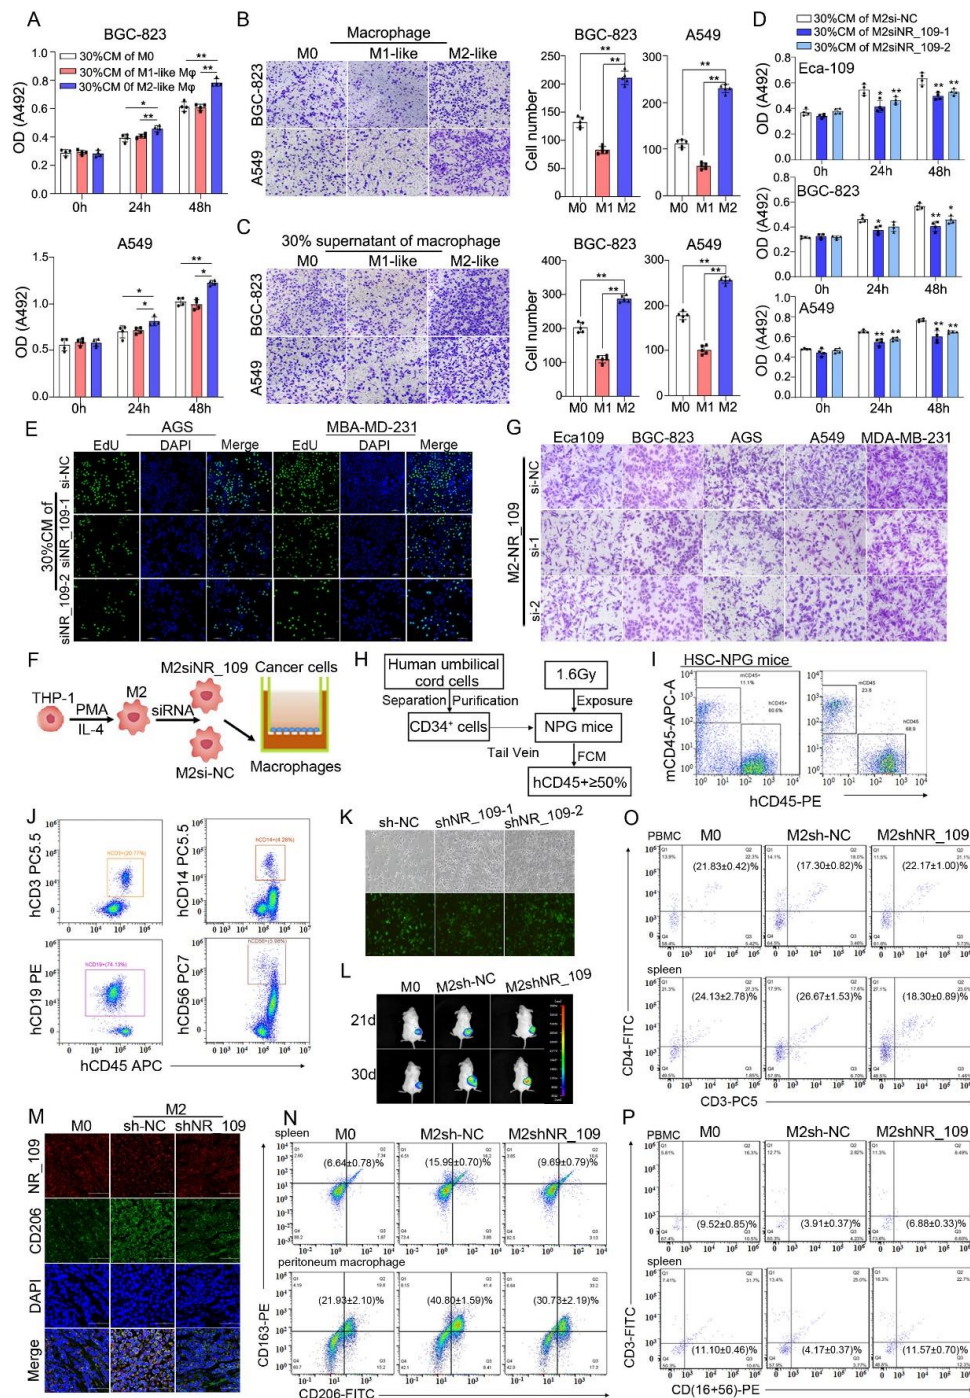

**Figure. S2 The role of NR\_109 in M2-like macrophage polarization.**

**A.** The proliferation of tumor cells when cocultured with 30% supernatant of M2-like macrophages was analyzed by MTS assays. **B-C.** The migration of tumor cells when cocultured with cells or 30% supernatant of M2-like macrophages was exhibited. **D.** The proliferation of tumor cells in the coculture system with 30% culture medium (CM) of M2-NR\_109<sup>low</sup> cells was measured by using MTS and **E.** EdU incorporation

assays. **F.** The schematic diagram showed the coculture system of tumor cells and macrophages. **G.** The migration of tumor cells was reduced when cocultured with M2-NR\_109<sup>low</sup> cells. **H.** The construction of HSC-NPG mice. **I.** The proportion of human CD45<sup>+</sup> cells in HSC-NPG mice was analyzed by FCM. **J.** The CD3<sup>+</sup> T cells, CD14<sup>+</sup> cells, CD19<sup>+</sup> B cells and CD56<sup>+</sup> NK cells derived from human were detected in the peripheral blood of HSC-NPG mice. **K.** The M2shNR\_109 cells in which NR\_109 were stably knocked down in M2-like macrophages were established. **L.** The tumor size of different groups in HSC-NPG mice was analyzed by *in vivo* imaging. **M.** IF combined with FISH assays showed that the MFI of NR\_109 and CD206 in tumor tissues were also decreased in M2shNR\_109 group. **N-P.** The percentage of M2-like macrophages (CD163<sup>+</sup>CD206<sup>+</sup>) in spleen and peritoneum macrophages, and the percentage of CD4<sup>+</sup> T cells and NK cells (CD3<sup>+</sup>CD16<sup>+</sup>CD56<sup>+</sup>) in the PBMC and spleen were measured by FCM assays. The statistical data are from three independent experiments and the bar indicates the SD values (\* $p < 0.05$ , \*\* $p < 0.01$ ).

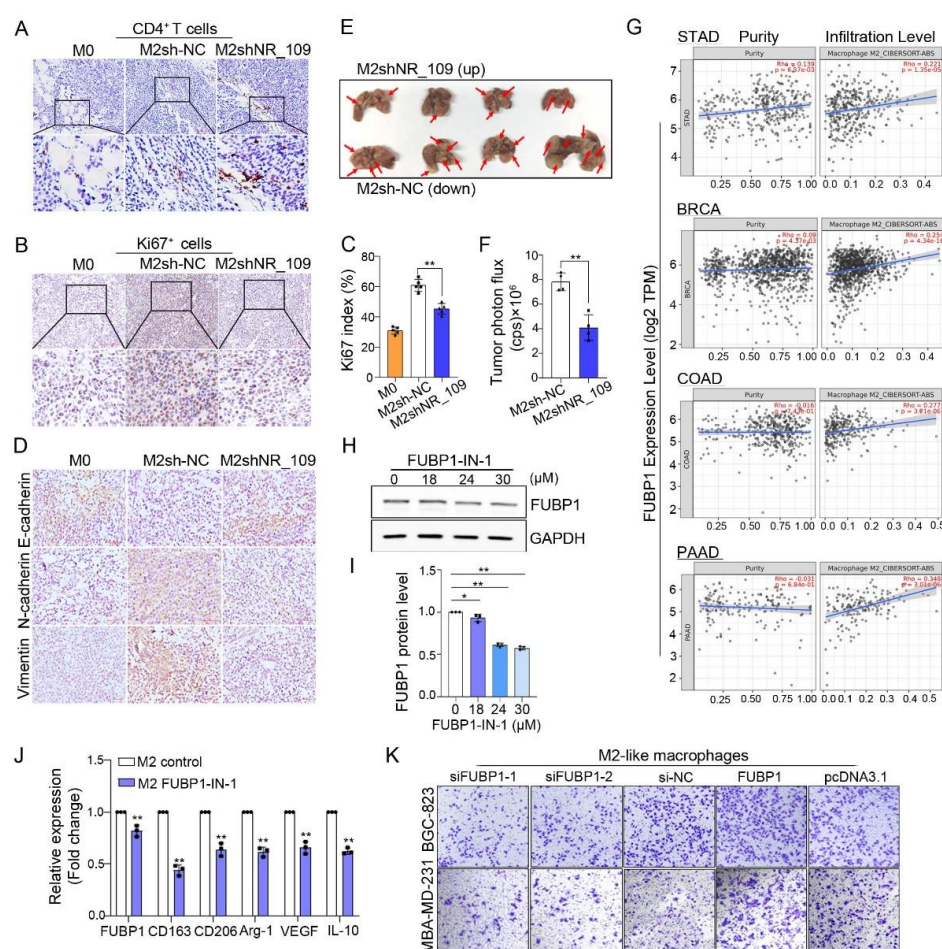

**Figure. S3 Knockdown NR\_109 reduced the activity of M2-like macrophages to promote growth and metastasis of tumor cells *in vivo*.**

**A.** The infiltration of CD4<sup>+</sup> T cells, **B-C.** Ki67 index and **D.** EMT-related markers in tumor tissues of different groups in HSC-NPG mice were analyzed by IHC. **E.** The number of lung metastasis nodules and **F.** the statistical graph of photon flux which presented the tumor size of distinct groups in lung metastasis model were exhibited. **G.** TIMER2.0 database revealed a significant positive correlation between the expression of FUBP1 and the infiltration of M2-like macrophages in many cancer types. **H.** Western-blot and **I.** qPCR assays showed the expression of FUBP1 was significantly attenuated in M2-like macrophages treated with the FUBP1 inhibitor, FUBP1-IN-1. **J.** Expression of M2-related markers in M2-like macrophages treated with FUBP1-IN-1 was measured by qPCR. **K.** The migration of tumor cells was examined when cocultured with M2-FUBP1<sup>low</sup> cells or M2-FUBP1<sup>high</sup> cells. The statistical data are from three independent experiments and the bar indicates the SD values (\* $p < 0.05$ , \*\* $p < 0.01$ ).

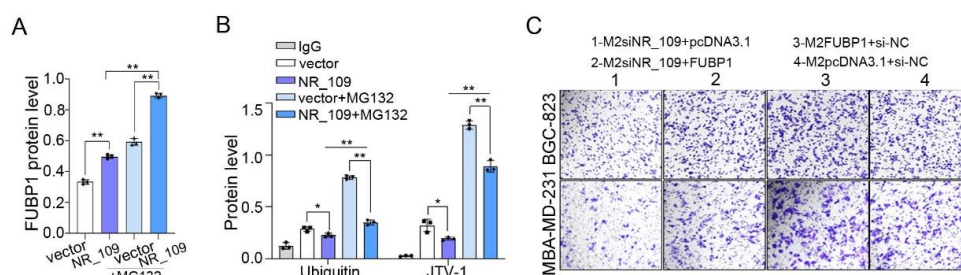

**Figure. S4 NR\_109 hindered the ubiquitin-mediated degradation of FUBP1.**

**A.** The statistical chart showed that the expression of FUBP1 was further increased in M2-NR\_109<sup>high</sup> cells treated with MG132 (25μM). **B.** The statistical chart of the co-IP assays exhibited that ectopic NR\_109 expression decreased the density of ubiquitin and JTV-1, and the MG132 further enhanced the effect. **C.** The migration of cocultured tumor cells was partially reversed when co-transfected with FUBP1 and siNR\_109 in M2-like macrophages. The statistical data are from three independent experiments and the bar indicates the SD values (\* $p < 0.05$ , \*\* $p < 0.01$ ).

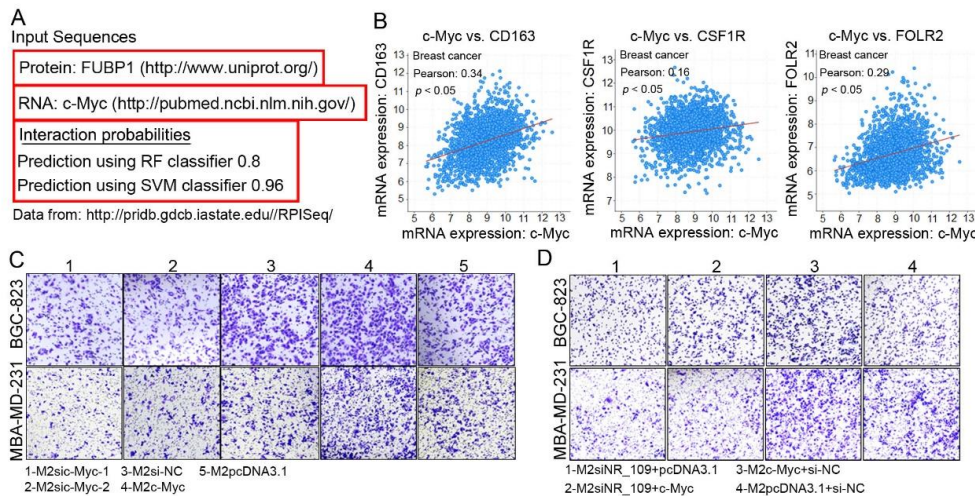

**Figure. S5 c-Myc was participated in M2-like macrophage polarization.**  
**A.** The RNA-Protein Interaction Prediction (RPISeq) website showed an obvious interaction probability score between FUBP1 protein and the c-Myc RNA sequence. **B.** The cBioPortal database showed that c-Myc was significant associated with TAM-related markers including CD163, CSF1R and FOLR2 in BC. **C.** The migration of tumor cells was measured when cocultured with M2-c-Myc<sup>low</sup> cells or M2-c-Myc<sup>high</sup> cells. **D.** The migration of cocultured tumor cells was partially reversed when co-transfected with c-Myc and siNR\_109 in M2-like macrophages.

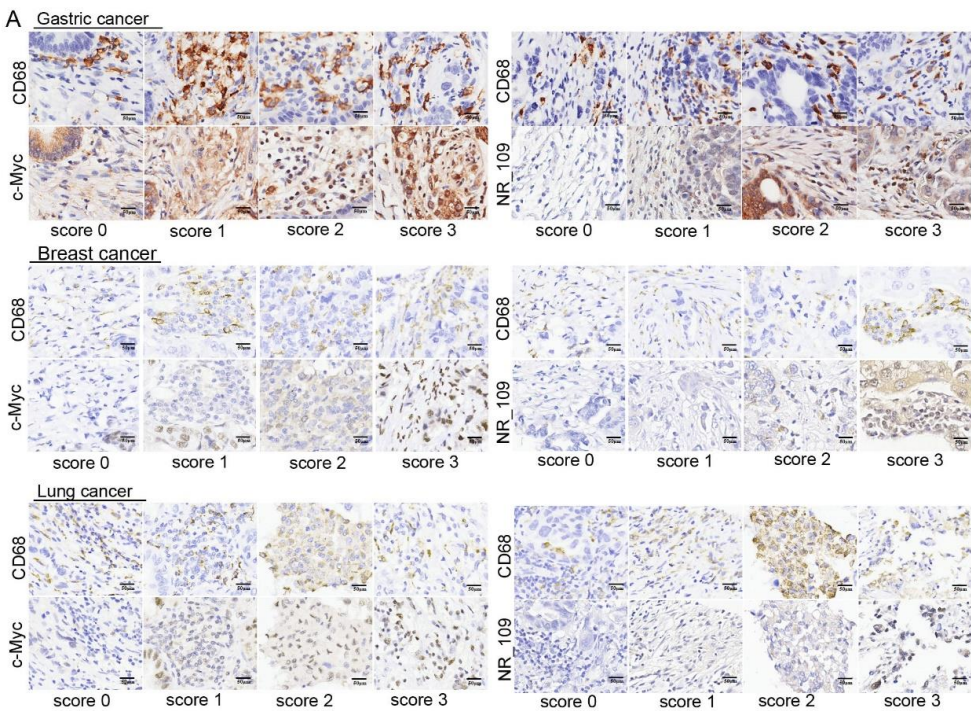

**Figure. S6 A.** The representative regions and scores of IHC staining for CD68 and ISH staining for NR\_109 in GC, BC and LC tissues.

**Table S1** Correlation between the number of CD163<sup>+</sup> TAMs and clinicopathologic characteristics in GC and BC

| Parameters | Number of CD163 <sup>+</sup> TAMs |         |          |         |          |
|------------|-----------------------------------|---------|----------|---------|----------|
|            | TS                                |         | P-value  | TN      |          |
|            | GC                                | Low (%) | High (%) | Low (%) | High (%) |
| Age/year   |                                   |         | 0.705    |         | 0.702    |
| < 60       | 5 (50)                            | 5 (50)  |          | 7 (70)  | 3 (30)   |
| ≥ 60       | 8 (40)                            | 12 (60) |          | 12 (60) | 8 (40)   |
| Gender     |                                   |         | 0.427    |         | 0.372    |
| Male       | 11 (48)                           | 12 (52) |          | 16 (70) | 7 (30)   |
| Female     | 2 (29)                            | 5 (71)  |          | 3 (43)  | 4 (57)   |
| Grade      |                                   |         | 0.419    |         | 0.034*   |
| I-II       | 10 (45)                           | 12 (55) |          | 16 (73) | 6 (27)   |
| III        | 2 (25)                            | 6 (75)  |          | 2 (25)  | 6 (75)   |
| Tumor size |                                   |         | 0.721    |         | 1.000    |
| ≤ 5cm      | 5 (38)                            | 8 (62)  |          | 8 (62)  | 5 (38)   |
| > 5cm      | 8 (47)                            | 9 (53)  |          | 11 (65) | 6 (35)   |
| Lymph node |                                   |         | 0.045*   |         | 0.702    |
| No         | 7 (70)                            | 3 (30)  |          | 7 (70)  | 3 (30)   |
| Yes        | 5 (25)                            | 15 (75) |          | 12 (60) | 8 (40)   |
| TNM Stage  |                                   |         | 1.000    |         | 1.000    |
| I-II       | 7 (47)                            | 8 (53)  |          | 10 (67) | 5 (33)   |
| III-IV     | 6 (40)                            | 9 (60)  |          | 9 (60)  | 6 (40)   |
| BC         |                                   |         |          |         |          |
| Age/year   |                                   |         | 0.022*   |         | 0.983    |
| < 70       | 16 (36)                           | 28 (64) |          | 25 (57) | 19 (43)  |
| ≥ 70       | 10 (71)                           | 4 (29)  |          | 8 (57)  | 6 (43)   |
| Grade      |                                   |         | 0.771    |         | 0.621    |
| I-II       | 14 (47)                           | 16 (53) |          | 18 (60) | 12 (40)  |
| III        | 12 (43)                           | 16 (57) |          | 15 (54) | 13 (46)  |
| Tumor size |                                   |         | 1.000    |         | 1.000    |
| ≤ 4cm      | 23 (45)                           | 28 (55) |          | 29 (57) | 22 (43)  |
| > 4cm      | 3 (43)                            | 4 (57)  |          | 4 (57)  | 3 (43)   |
| Lymph node |                                   |         | 0.506    |         | 0.049*   |
| No         | 14 (41)                           | 20 (59) |          | 23 (68) | 11 (32)  |
| Yes        | 12 (50)                           | 12 (50) |          | 10 (42) | 14 (58)  |
| TNM Stage  |                                   |         | 0.020*   |         | 0.477    |
| I-II       | 22 (55)                           | 18 (45) |          | 24 (60) | 16 (40)  |
| III-IV     | 4 (22)                            | 14 (78) |          | 9 (50)  | 9 (50)   |

The  $\chi^2$ -tests were used. \*Statistically significant values.  
TN: tumor nest, TS: tumor stroma, GC: gastric cancer, BC: breast cancer

**Table S2** Correlation between the expression of NR\_109 and the number of CD163<sup>+</sup>TAMs in TS and TN of GC and BC

| Protein | Expression | NR_109 |      | r     | P-value |
|---------|------------|--------|------|-------|---------|
|         |            | Low    | High |       |         |
| TS (GC) | Low        | 8      | 7    | 0.424 | 0.019*  |
| CD163   | High       | 2      | 13   |       |         |
| TN (GC) | Low        | 7      | 11   | 0.144 | 0.447   |
| CD163   | High       | 3      | 9    |       |         |
| TS (BC) | Low        | 17     | 9    | 0.309 | 0.018*  |
| CD163   | High       | 11     | 21   |       |         |
| TN (BC) | Low        | 16     | 17   | 0.005 | 0.971   |
| CD163   | High       | 12     | 13   |       |         |

The Spearman correlation analysis were used. \*Statistically significant values. TN: tumor nest, TS: tumor stroma, GC: gastric cancer, BC: breast cancer.

**Table. S3** Primers for quantifying gene expression

| Gene          | Primer Sequence (5'->3')           |
|---------------|------------------------------------|
| Arg-1         | Forward: GCAAGGTGATGGAAGAAA        |
|               | Reverse: CTGGTGTGAAAGATGGGT        |
| IL-10         | Forward: GGAGAACCTGAAGACCCT        |
|               | Reverse: GGCTTTGTAGATGCCTTTC       |
| TGF- $\beta$  | Forward: GGCCAGATCCTGTCCAAGC       |
|               | Reverse: GTGGGTTTCCACCATTAGCAC     |
| CCL5          | Forward: CCTCATTGCTACTGCCCTCT      |
|               | Reverse: GTTCAGCCGGGAGTCATACA      |
| CD206         | Forward: CGTGTGCACCTACCTCAAGA      |
|               | Reverse: AAGGACAGACCAGTACAATTCAGTA |
| CD163         | Forward: TTTGTCAACTTGAGTCCCTTCAC   |
|               | Reverse: TCCCGCTACACTTGTTTTTCAC    |
| VEGF          | Forward: CTTGCCTTGCTGCTCTACCT      |
|               | Reverse: TCTCTCCTATGTGCTGGCCT      |
| TNF- $\alpha$ | Forward: TTTCCGTGAAAACGGAGCTG      |
|               | Reverse: CACCCACAAGAAGAGGCAGAT     |
| HLA-DRA       | Forward: GGCGGCTTGAAGAATTTGGAC     |
|               | Reverse: CATTGGTGATCGGAGTATAGTTGGA |
| IL-12         | Forward: CCTTGCACTTCTGAAGAGATTGA   |
|               | Reverse: ACAGGGCCATCATAAAAGAGGT    |
| iNOS          | Forward: CCATCATGGACCACCACACA      |
|               | Reverse: TCCGCATTAGCACAGAAGCA      |
| GAPDH         | Forward: CGCTGAGTACGTCGTGGAGTC     |
|               | Reverse: GCTGATGATCTTGAGGCTGTTGTC  |
| NR_109        | Forward: TTGAGATGTCGAGAGCGAGC      |
|               | Reverse: CTTGGGCTGTGCTGAGACTA      |
| c-Myc         | Forward: CCACCAGCAGCGACTCTGA       |
|               | Reverse: GCAGAAGGTGATCCAGACTC      |

| FUBP1        | Forward: AGGATTACCAGCCTGAACACT<br>Reverse: GACAACACCCGAAAGGATAGC |
|--------------|------------------------------------------------------------------|
| siRNA Oligos |                                                                  |
| Target gene  | Sequence (5'->3')                                                |
| NR_109-1     | Sense: CUGUCAUCUACACAUGAAUTT                                     |
|              | Antisense: AUUCAUGUGUAGAUGACAGTT                                 |
| NR_109-2     | Sense: CUUGUCACCAUAACAUAUUTT                                     |
|              | Antisense: AUA AUGUUAUGGUGACAAGTT                                |
| FUBP1-1      | Sense: GGUGCUGACAAACCUCUUATT                                     |
|              | Antisense: UAAGAGGUUUGUCAGCACCTT                                 |
| FUBP1-2      | Sense: GGUGUUCGCAUUCAGUUUATT                                     |
|              | Antisense: UAAACUGAAUGCGAACACCTT                                 |
| c-Myc-1      | Sense: CGUCCAAGCAGAGGAGCAATT                                     |
|              | Antisense: UUGCUCUCUGCUUGGACGTT                                  |
| c-Myc-2      | Sense: GCUUGUACCUGCAGGAUCUTT                                     |
|              | Antisense: AGAUCCUGCAGGUACAAGCTT                                 |
