# Supplementary material for: The NR_109/FUBP1/c-Myc axis regulates TAM polarization and remodels the tumor microenvironment to promote cancer development
Source: HighWire-hosted journal article supplement (doi:10.1136/jitc-2022-006230), 2023-05-01
Supplement: jitc-2022-006230supp002_data_supplement.xlsx [file jitc-2022-006230supp002_data_supplement.xlsx]

## Sheet: mRNA
ProbeName	pvalues	foldchange	M2_1_NS	M2_2_NS	M2_3_NS	M2_1_flags	M2_2_flags	M2_3_flags	M0_1_NS	M0_2_NS	M0_3_NS	M0_1_flags	M0_2_flags	M0_3_flags	ProbeName.1	ControlType	Type	ProbeSeq	Source	chr	strand	start	end
CUST_106574_PI430048170	0.0220915	0.480229	4.20247	4.73509	4.04187	P	P	A	5.45149	5.23847	5.54171	P	P	P	CUST_106574_PI430048170	0	Coding	AATCGGCCATGGATTTGCTTTGAGCAAACACCCCGCAGTCAGGACTTACTCCTGGAAAAA	RefSeq	chr22	-	17178789	17219585
CUST_128724_PI430048170	0.00526504	0.164255	2.14029	3.03756	2.22931	A	A	A	5.16908	5.30017	4.90672	P	P	P	CUST_128724_PI430048170	0	Coding	GAAGGTGCTACTTTTAAGTAATGTATGTGCGCTCTGTAAAGTGATTACATTTGTTTCCTG	RefSeq	chr5	-	159314782	159330473
CUST_144718_PI430048170	0.000351116	0.326688	9.21186	9.14225	9.07691	P	P	P	10.7751	10.7529	10.7481	P	P	P	CUST_144718_PI430048170	0	Coding	CTTTGGGACAAAACAGAAGTCCATGGAGTTATCTAAGCTCTTGTAAGTGAGTTAATTTAA	RefSeq	chr19	+	47309846	47322070
CUST_21484_PI430048170	0.00142011	16.8814	6.28626	5.77717	6.23725	P	P	P	2.07615	2.0219	2.02242	A	A	A	CUST_21484_PI430048170	0	Coding	AGTTATTCACAGGGAATTCTGTGCAGTGTGCAGAGAGATTCCTAAACGGGAAAAGGACTG	RefSeq	chr8	+	133191038	133231689
CUST_102198_PI430048170	0.0026948	2.4622	6.77856	6.57366	6.84361	P	P	P	5.42924	5.47117	5.40841	P	P	P	CUST_102198_PI430048170	0	Coding	CCTGGAAAATCACTGAAGTATAAAAGACAGCTGAGTGAGGATGGAAGACAGCTAAGGCGA	RefSeq	chr5	+	66596347	67169595
CUST_130349_PI430048170	0.00011737	0.392278	8.9232	8.91297	8.81051	P	P	P	10.3291	10.2299	10.1338	P	P	P	CUST_130349_PI430048170	0	Coding	ATAGCTGGTTATTTCTCCCTTGTGTTAGTAATAAACGTCTTGCCACAATAAGCCTCCAAA	RefSeq	chr1	-	230702522	230714590
CUST_9356_PI430048170	1.77565e-05	5.54569	9.86846	9.90354	10.0729	P	P	P	7.40455	7.55229	7.47857	P	P	P	CUST_9356_PI430048170	0	Coding	TCCCAGGACTATTTTATCTTAAACTTAGCAGAGAGGATTTTCTGTCATGGAAAAAGCTTG	RefSeq	chr14	+	60981113	61083733
CUST_130179_PI430048170	6.3062e-05	0.295233	6.976	7.12806	7.01778	P	P	P	8.69892	8.92294	8.77546	P	P	P	CUST_130179_PI430048170	0	Coding	CCACTCAGCACATTTCATGGAGGTCATGTCTTTTCACTGATACTTTTTTGATAGTTTTTA	RefSeq	chr12	+	105330635	105371518
CUST_127756_PI430048170	0.0487574	0.497816	5.70585	6.08301	5.22234	P	P	P	6.64428	6.78752	6.72131	P	P	P	CUST_127756_PI430048170	0	Coding	CTTGTGTGACCTCCAGTGCATATTAGACCATTCACTGTATGAAAGAAAACATGTTGAATA	RefSeq	chr17_KI270857v1_alt	+	1173836	1180980
CUST_31704_PI430048170	0.0251547	0.487791	4.31427	4.31022	4.31364	P	A	A	5.19738	5.65568	5.13411	P	P	P	CUST_31704_PI430048170	0	Coding	TCTGAGGATCTGTTACCTGCATGTGCCAATTATGGAAATAAAATCTTCTAGTCTTTACTG	RefSeq	chr18	-	58670008	58671873
CUST_118535_PI430048170	8.85324e-05	2.10348	11.2134	11.3217	11.3001	P	P	P	10.1594	10.159	10.2964	P	P	P	CUST_118535_PI430048170	0	Coding	GCCATCCCGTCGACTCTCCATTTAAATTGTTTCTCTTTCTGCATAATAAACATTTGTTAA	RefSeq	chr1	+	158289772	158294774
CUST_130066_PI430048170	0.00191252	0.250545	4.82736	4.35667	4.15259	P	A	A	6.18862	6.54797	6.63757	P	P	P	CUST_130066_PI430048170	0	Coding	AGACAAAATGAAAAGGGTTTGACCTTGCAATAAAAGGAGACGTTTGGTTCTGGCAAAAAA	RefSeq	chr20	-	57168752	57266651
CUST_139532_PI430048170	0.000221607	2.96787	8.13206	8.22544	8.16186	P	P	P	6.70543	6.50238	6.59769	P	P	P	CUST_139532_PI430048170	0	Coding	CTGCCCTTCAGTTCTTTATCCTGATACCATTTAACACTGTCTGAATTAACTAGACTGCAA	RefSeq	chr7	+	90211685	90237678
CUST_140955_PI430048170	1.59964e-05	0.240385	8.91684	9.0029	8.96932	P	P	P	10.9402	11.0868	11.0294	P	P	P	CUST_140955_PI430048170	0	Coding	AAGTGGTAGGCAGTGTCCCTTCTGCTTGAAACCTATTGAAACCAATTTAAAACTGTGTAC	RefSeq	chr3	+	54122665	55074557
CUST_136796_PI430048170	0.000340999	2.56526	10.2957	10.2499	10.2452	P	P	P	8.81445	8.96355	8.93182	P	P	P	CUST_136796_PI430048170	0	Coding	TCTCATCCAAGTGGTCTGTAGAATTCATGTCCCTTACAGTGGTCATTTAAAGTCAATATT	RefSeq	chrX	-	8528873	8732186
CUST_138627_PI430048170	2.52752e-06	7.1681	10.1991	10.3742	10.3017	P	P	P	7.3781	7.55009	7.42174	P	P	P	CUST_138627_PI430048170	0	Coding	GGAGCAAAACTGGCTATTTCTGTGAATGATATAAAACAGGGTTCTCTGTAATGGTATTGT	RefSeq	chr2	+	23385426	23708613
CUST_82957_PI430048170	0.000383293	2.85423	7.62357	7.81922	7.88832	P	P	P	6.21475	6.35331	6.23266	P	P	P	CUST_82957_PI430048170	0	Coding	TGAAGCCTTCAAATACTTCCTGCAAGGCATGGGCTACATGCCCTCAGCCAGCATGACCCG	RefSeq	chr16	+	58464089	58513619
CUST_133889_PI430048170	0.042235	2.84522	5.63259	5.50762	4.80291	P	P	P	4.26467	2.91677	4.04123	A	A	A	CUST_133889_PI430048170	0	Coding	CCAGTTTGCCTTGCCAAATAAACTCTGTTTATGTGAATTTATTAAACGACCATGCCATAA	RefSeq	chr12	-	18080868	18090193
CUST_135636_PI430048170	0.0113475	2.01959	6.65325	6.63236	6.81766	P	P	P	5.93721	5.66018	5.42531	P	P	P	CUST_135636_PI430048170	0	Coding	CTCTCTCTGCAGTTATTTAATGCCTGTGTCAGATCTACTGTAAAAAGAGGATTAAGTAAA	RefSeq	chr17	+	7650889	7657771
CUST_130709_PI430048170	2.02647e-05	3.5911	10.9875	11.0688	10.9091	P	P	P	9.08597	9.17058	9.17826	P	P	P	CUST_130709_PI430048170	0	Coding	CCCTCTTGCTCTTCTTTAGTTTGAAAAAACAAAAACGTGGCCTTGGAATTTTCATTTTGA	RefSeq	chr15	+	97960702	97973838
CUST_94116_PI430048170	0.00281706	2.01191	7.63668	7.39227	7.74861	P	P	P	6.37578	6.61246	6.76048	P	P	P	CUST_94116_PI430048170	0	Coding	GCAGGATGCTATCTAAAATATAAGAAGAAAAATAGTTTGTCTTCCAAACTCCCTGAACCT	RefSeq	chr17	+	47323960	47441311
CUST_91106_PI430048170	0.000199371	2.15454	10.1272	10.0307	10.1721	P	P	P	9.03896	8.96814	9.00348	P	P	P	CUST_91106_PI430048170	0	Coding	GATCACTTTGCTGAGTACATCCAAGATTTGAAGAACTGAAATAAATCAGCTTTAAACCTG	RefSeq	chr12	+	27524111	27695564
CUST_91835_PI430048170	0.000113927	3.5904	8.69765	8.81869	8.99203	P	P	P	6.83352	7.00498	7.13675	P	P	P	CUST_91835_PI430048170	0	Coding	GGAGCATCAACCTACAGTTTTTGGACAGATAGTCCCATGGAAAGAGACTGTCATCATCAC	RefSeq	chr12	-	57762333	57767193
CUST_137213_PI430048170	0.0070669	0.460758	6.99911	6.50789	6.93878	P	P	P	7.89788	7.82789	8.1069	P	P	P	CUST_137213_PI430048170	0	Coding	CATGCACACTGTGATTTGCAAACATATGTCCGCTCTTCAATAAATGTTACGGCTTTCACA	RefSeq	chr6	+	147508691	147570021
CUST_137708_PI430048170	0.0375652	0.44187	4.59811	3.60608	4.30553	A	A	A	5.44806	5.58085	5.15391	P	P	P	CUST_137708_PI430048170	0	Coding	CAAATTCCCAAATCAATCTCTGGAATAAATAGAGAGGTAATTAAATTGCTGGAGCCAACT	RefSeq	chrX	+	12867082	12890361
CUST_134102_PI430048170	0.000533392	0.386349	6.77617	6.73409	6.64059	P	P	P	8.00769	8.01077	8.23934	P	P	P	CUST_134102_PI430048170	0	Coding	CTGTGTCTTTAACCACTGCACAATGCATTGCCTGTTTAATAAAAGGTTTCAAACATGAAA	RefSeq	chr2	-	98793845	98936221
CUST_127820_PI430048170	0.00013045	4.37899	9.23231	9.41195	9.37245	P	P	P	7.03346	7.25095	7.33049	P	P	P	CUST_127820_PI430048170	0	Coding	GCTTTCTGCTTCACTGAAAAAGCAGTTTACCTGAAAAGAGCATGTAACCTATATTTTGTT	RefSeq	chr5	-	72439898	72507422
CUST_138408_PI430048170	0.00678578	2.23243	7.75877	7.72822	7.73849	P	P	P	6.40847	6.56958	6.75133	P	P	P	CUST_138408_PI430048170	0	Coding	GCAGATTAGTCCTGTAATGAACACCAACTAATGTAAATCAAATTCATTCTGGTGATGGTA	RefSeq	chr8	+	103500747	104254428
CUST_126665_PI430048170	0.0273522	0.44953	5.20215	5.0033	4.51302	P	A	P	6.04873	6.08084	6.13229	P	P	P	CUST_126665_PI430048170	0	Coding	GCCTACAGGGGAAAAACAAGCTGGATAACCACCCAAAGTGTTTGTATTTTCGTTGGAAAC	RefSeq	chr12	-	106063346	106140033
CUST_129025_PI430048170	0.00225338	0.425611	4.93446	5.11365	5.33853	P	P	P	6.58082	6.36661	6.12979	P	P	P	CUST_129025_PI430048170	0	Coding	GAGAATTTATGGACGTTGTAGAAATGTACAAATGCATTTCCAAACTGCCTTAAACGTTGT	RefSeq	chr9	-	86944361	86947189
CUST_49692_PI430048170	0.045825	0.472264	4.72968	5.02042	4.72283	P	P	P	6.38884	5.54972	5.64907	P	P	P	CUST_49692_PI430048170	0	Coding	TGCCCAAGTGGATTAGCCTTTTTAGAGTTTATTAATTAAAAGAGAGCAGCAAGAATGGCA	RefSeq	chr7	-	56114680	56116397
CUST_145617_PI430048170	0.00040122	0.488954	11.6443	11.8094	11.5765	P	P	P	12.685	12.8156	12.6301	P	P	P	CUST_145617_PI430048170	0	Coding	GTAGACTTTGTCTTATGTGTGAAAAGTCCTAGGAAAGTGGTTGATGTTTCTTATAGCAAT	RefSeq	chr1	-	89052303	89065360
CUST_117787_PI430048170	0.00282279	2.45735	12.9669	13.2076	13.2918	P	P	P	11.888	11.9041	11.8001	P	P	P	CUST_117787_PI430048170	0	Coding	GCCTGTTGGGCCAGAAGACAGAAACTCCAACTGGCAAAAAAGCAAGCATCTAAGAAAAAA	RefSeq	chr4	-	56647987	56681706
CUST_139392_PI430048170	0.000525836	3.59768	14.6584	14.5912	14.9828	P	P	P	12.8374	12.8137	13.0583	P	P	P	CUST_139392_PI430048170	0	Coding	CTGGCCCTCTAGCTTCTACCCTTTGTCCCTGTAGCCTATACAGTTTAGAATATTTATTTG	RefSeq	chr1	-	156699607	156705667
CUST_133524_PI430048170	0.00735876	2.68508	5.70835	6.05221	6.21448	P	P	P	4.65262	4.58114	4.50803	P	P	A	CUST_133524_PI430048170	0	Coding	TCAGTAGATAGAATGAGGTCCCCATTCTGAAATATTTAGCAGACTGGAACCACCACGCAA	RefSeq	chr6_GL000256v2_alt	-	1401828	1412013
CUST_135095_PI430048170	7.67024e-05	16.7036	16.1745	16.2085	16.4944	P	P	P	12.2026	12.1775	12.3284	P	P	P	CUST_135095_PI430048170	0	Coding	CCTCCTGTCCTGTCCTTGCCCCTCAGGACTGCTGGAAAATAAATCCTTTAAAATAGTAAA	RefSeq	chr16	+	57358782	57366190
CUST_138884_PI430048170	0.000118291	3.05043	12.7366	12.7105	12.7937	P	P	P	11.0405	11.1584	11.2109	P	P	P	CUST_138884_PI430048170	0	Coding	CAGTTGCACTATTCTGAGGGAAAATCTGACACCTAAGAAATTTACTGTGAAAAAGCATTT	RefSeq	chr3	+	12288936	12434356
CUST_135976_PI430048170	2.91428e-06	3.54308	13.6744	13.6305	13.684	P	P	P	11.8294	11.7979	11.8858	P	P	P	CUST_135976_PI430048170	0	Coding	GGACTTGTCTCCTTTTCTGTGAAAATGCTTTGTAAAAAGTTGTTATTGTTTGCATAGAGC	RefSeq	chr17_KI270857v1_alt	-	2707024	2710253
CUST_113900_PI430048170	0.0269224	2.02674	6.03132	5.84255	5.38288	P	P	P	4.83799	4.78757	4.64108	P	P	A	CUST_113900_PI430048170	0	Coding	GGAACGAGAAGCCACTAGTAAAAGAAGCAGAATCTGGTAATATAAGTCAAAAGTCTGATG	RefSeq	chr8	+	17922856	18029948
CUST_114816_PI430048170	0.0113989	0.318167	4.51661	5.40217	4.975	P	P	P	6.64523	6.85523	6.45658	P	P	P	CUST_114816_PI430048170	0	Coding	CTTTATCCAGGCTGGTCTGCAAGAGACAATTATGGTAAGAAAAAGAAGAGGAAGAGAGAG	RefSeq	chr4	-	108047544	108168956
CUST_128636_PI430048170	0.01286	2.37819	6.49229	6.75531	6.41178	P	P	P	4.86743	5.5301	5.44899	P	P	P	CUST_128636_PI430048170	0	Coding	TTCGCAATAAGTACCAAGAAGCCCAAGATATCAGCCCAAAAGTCAATCTTATCATATTTC	RefSeq	chr1	-	158327949	158331531
CUST_67722_PI430048170	0.000508178	2.09164	9.2787	9.27837	9.37046	P	P	P	8.16074	8.211	8.3566	P	P	P	CUST_67722_PI430048170	0	Coding	GAAAACCTCTATGCTGCCGTGAAGCACACACAGCCTGAGGATGGGGTGGAGATGGACACT	RefSeq	chr19	+	54616929	54637530
CUST_144233_PI430048170	0.000303697	5.51984	10.232	10.3741	10.6565	P	P	P	8.08435	7.97019	7.8364	P	P	P	CUST_144233_PI430048170	0	Coding	GCTTCTCTCAGTCACTGCTGGCGCTTTCTTAATCTTTATCCAATAAAATGAAACAAAAAA	RefSeq	chr2	-	47520775	47570331
CUST_125966_PI430048170	0.000890648	0.443357	4.3421	4.39688	4.64997	P	A	P	5.48807	5.80509	5.61749	P	P	P	CUST_125966_PI430048170	0	Coding	CTTCATAGCTATTGGCTAAGAGAGATAATGAGCTGATGGTCTATTTTAACCTTGAAAGTA	RefSeq	chrX	+	16946690	17153280
CUST_108300_PI430048170	0.00668952	0.331046	8.17928	8.52094	8.05168	P	P	P	9.88733	9.86743	9.82268	P	P	P	CUST_108300_PI430048170	0	Coding	GGAGTTCTTCTTCTCCTAGGATTCCTAAGACTGCTGCTGAATTTATAAAAATTAAGTTTG	RefSeq	chr12	-	7470815	7503818
CUST_127257_PI430048170	2.96555e-05	3.15992	6.90319	6.94353	6.88194	P	P	P	5.2963	5.18076	5.27009	P	P	P	CUST_127257_PI430048170	0	Coding	CTCAGGTCTTAATTAGGAATAAATGAGGTGGGAAATAAACATTCTTATGACAGTTCTACC	RefSeq	chr17	+	60422503	60431426
CUST_131098_PI430048170	0.0180857	0.455034	5.65859	5.06612	5.66277	P	P	P	6.57413	6.7659	6.5213	P	P	P	CUST_131098_PI430048170	0	Coding	ATTTCAGAGTGGGGAAGTGATAAACTATTTGCCTTCTGGAGCTCTTTGTGAAAAATTAAA	RefSeq	chr1	-	183935831	184037770
CUST_128690_PI430048170	0.00436495	3.68761	6.03818	6.19797	6.40933	P	P	P	4.43589	3.89408	4.60092	A	A	A	CUST_128690_PI430048170	0	Coding	ACCCCCAAATTTGACTCTGGGAGACTCAGCCAAATCCTATCTGGTAATAAAATTTCTTTT	RefSeq	chr19	-	10512741	10517992
CUST_138963_PI430048170	0.00135503	2.40599	9.23138	9.35979	9.5698	P	P	P	8.02212	8.15549	8.19808	P	P	P	CUST_138963_PI430048170	0	Coding	GACATGATATAGTCAGCTGCCTTTTAAGAGGTCTTATCTGTTCAGTGTTAAGTGATTTAA	RefSeq	chr12	+	4273735	4305356
CUST_128254_PI430048170	0.000599685	0.4427	7.20152	7.14511	7.06468	P	P	P	8.33131	8.29589	8.31397	P	P	P	CUST_128254_PI430048170	0	Coding	ACCTTCCTATAGAAAGTCTTCGTGTGTCCTAGGACTTGGCTATCGTAGAGTGGTACCTTA	RefSeq	chr15	+	75201879	75212169
CUST_141931_PI430048170	0.000760117	2.66146	11.584	11.5089	11.3802	P	P	P	10.0463	10.0863	10.1105	P	P	P	CUST_141931_PI430048170	0	Coding	AGGCCATAGGGCATAATTTGCATCTCAAATCTGAGAATAAACTGATGAACTGTGAAAAAA	RefSeq	chr19	-	9959560	10010471
CUST_137597_PI430048170	0.00374501	0.313123	4.31	4.69856	4.86488	P	A	P	6.40283	6.3659	6.17478	P	P	P	CUST_137597_PI430048170	0	Coding	CCAGCAGGAGTGGAGTTTGGTTTACTGATTTTACTGTTTTGTGTTCATGAATCTTTATTT	RefSeq	chr11	-	63552769	63563383
CUST_137490_PI430048170	2.46466e-05	10.795	10.6914	10.8301	10.8435	P	P	P	7.1936	7.39787	7.46771	P	P	P	CUST_137490_PI430048170	0	Coding	CAGGCTATTCTACTTTAAAGGAAGCCTTTTTATTTTGCTGCACACAATCTAGCAGGAATC	RefSeq	chr12	-	10158299	10172191
CUST_139127_PI430048170	0.00378513	0.430386	7.04032	7.25841	7.39958	P	P	P	8.43556	8.52369	8.40789	P	P	P	CUST_139127_PI430048170	0	Coding	TGAGTTAGGCTGAGCCACAGGCATTTCCTGCTTATTTTAGGATTACCCACTCATCAGAAA	RefSeq	chr19	-	51745769	51751897
CUST_137485_PI430048170	0.000213336	3.02925	15.903	15.8433	15.9873	P	P	P	14.3128	14.1823	14.4342	P	P	P	CUST_137485_PI430048170	0	Coding	TCAGCCTGTGTAACCATGTGGAAATAAAAATTGACGACCAATGTATTATATGGACAACTT	RefSeq	chr21	+	34073522	34143034
CUST_139120_PI430048170	0.00609634	2.52192	13.3213	13.3283	13.3613	P	P	P	11.8719	11.8972	12.213	P	P	P	CUST_139120_PI430048170	0	Coding	GAAGTAAGTGTGTTTGTTTTCATCTTATGGAAACTCTTGATGCATGTGCTTTTGTATGGA	RefSeq	chr4	-	138164093	138242349
CUST_129679_PI430048170	0.00376064	2.05717	5.21546	5.27844	5.03391	P	P	P	4.31157	3.89855	4.17654	A	A	A	CUST_129679_PI430048170	0	Coding	AACAGATGCATTGTTGCTTTTCTGTGCTGTCTCTGCAGATTAAAACATAATGATTACACT	RefSeq	chr3	-	108907794	108953830
CUST_142911_PI430048170	0.00302925	2.94608	7.27107	7.25608	7.2057	P	P	P	5.58701	5.57124	5.87791	P	P	P	CUST_142911_PI430048170	0	Coding	CTAAGAAGGGAAAATATCCATCCTGAAGGTGTTTTTCATTCACTTTAATAGAAGGGCAAA	RefSeq	chr3	+	159988835	159996019
CUST_127331_PI430048170	1.25677e-05	4.97153	12.443	12.4202	12.6164	P	P	P	10.0878	10.1963	10.2574	P	P	P	CUST_127331_PI430048170	0	Coding	CCAGACCAACCCTGAGATTTTGTCAACCTGATTAAGTCAATATGAATGATTAAAAAGATG	RefSeq	chr9	+	98807698	98850081
CUST_130021_PI430048170	0.0012666	2.86891	8.6636	8.6567	8.83376	P	P	P	6.96935	7.266	7.33838	P	P	P	CUST_130021_PI430048170	0	Coding	GATGTAGGCTAACAATGAAAAGTATTTGCCAAACTGAATAAAACTGTCATGGTTACCTTG	RefSeq	chr18	-	69862955	69957176
CUST_142900_PI430048170	6.9097e-05	2.78944	8.74026	8.77585	8.93639	P	P	P	7.26082	7.29093	7.46037	P	P	P	CUST_142900_PI430048170	0	Coding	TCATTAGCTAGGACAACAATGCATTTGCAGTAGTGAGATTTCGCTAAAAAATTAAAGCCA	RefSeq	chr21	-	34446687	34512275
CUST_130778_PI430048170	8.52857e-06	6.53449	10.8164	11.0493	10.9051	P	P	P	8.17264	8.33858	8.13692	P	P	P	CUST_130778_PI430048170	0	Coding	GCTTATGGTCCCCAGCATTTACAGTAACTTGTGAATGTTAAGTATCATCTCTTATCTAAA	RefSeq	chr2	+	169067034	169096167
CUST_136687_PI430048170	2.25483e-05	3.74696	10.8825	10.75	10.8062	P	P	P	8.94826	8.8938	8.88161	P	P	P	CUST_136687_PI430048170	0	Coding	GATATTTTTTCTACGCCAAAACAGACGGGAAAGGGAACAAAATAAAGTGAAATCCAATAC	RefSeq	chr12	+	57216794	57226449
CUST_142297_PI430048170	0.0129168	2.48924	6.22566	6.4413	6.85151	P	P	P	5.12733	5.32656	5.1813	P	P	P	CUST_142297_PI430048170	0	Coding	AAGAAGTAACTACAGTTAGGGCTCCTATTCAACACACACATGCTTCCCTTTCCTGAGTCC	RefSeq	chr14	-	20801355	20802877
CUST_131194_PI430048170	0.000948671	2.30975	10.2033	10.338	10.1268	P	P	P	8.9749	9.05138	9.0256	P	P	P	CUST_131194_PI430048170	0	Coding	TGTCACCACTTCAAAAAATCAATTTGTTCTTAGAACCTGGTTGAAAATACCAGGAAACTG	RefSeq	chr12	+	27524111	27695564
CUST_142187_PI430048170	0.00386669	2.04812	6.80907	7.17163	7.02377	P	P	P	5.90937	5.77077	6.20896	P	P	P	CUST_142187_PI430048170	0	Coding	AATCTTCACCGTGCAAAGTGGAAACCAGAGGCCCGGTCAGACAGTGACTAATCCAGGGCC	RefSeq	chr11	+	77034340	77041958
CUST_141027_PI430048170	0.0131236	6.82842	7.99855	8.18927	8.25952	P	P	P	5.66315	4.56469	5.66504	P	P	P	CUST_141027_PI430048170	0	Coding	GAGGGTGTTTCCTCCCAGAGTTACTTTAATAAAGGTTGTTCATAGAGTTGACTTGTTCAT	RefSeq	chr7	-	75769523	75789746
CUST_62870_PI430048170	0.000186649	3.7176	9.30856	9.30923	9.36705	P	P	P	7.40295	7.36046	7.53343	P	P	P	CUST_62870_PI430048170	0	Coding	ACAAAACAAGCTGCACTTTGCAGAGGTGGTAAATGAAAGGACTCTTGGCCTAACTTCAAG	RefSeq	chr17_KI270857v1_alt	-	2707024	2710253
CUST_127149_PI430048170	0.00026851	2.28044	7.15892	6.91138	7.00616	P	P	P	5.71544	5.91762	5.87847	P	P	P	CUST_127149_PI430048170	0	Coding	GAAAATGCCAGCCTAGTGTTTACAGTTTTCGGCCACAACATGAAGAGCAGCAATGACTTC	RefSeq	chr16	+	19168212	19268334
CUST_136016_PI430048170	0.000782061	2.23476	12.6096	12.7228	12.7574	P	P	P	11.5249	11.5614	11.5271	P	P	P	CUST_136016_PI430048170	0	Coding	TGCTGGATTCCATTAAAACAAAGGGCAAGAGTGCTGACTTCACTAACTTCGATCCTCGTG	RefSeq	chr8	+	85463901	85481492
CUST_143299_PI430048170	0.00293801	0.464503	6.79951	6.7494	6.40418	P	P	P	7.59879	7.82408	7.86608	P	P	P	CUST_143299_PI430048170	0	Coding	CCATCAGTGAAAAAGATGTACAGAACACATTTCTCTGATCTCCATAAACATGAAAACACT	RefSeq	chr10	+	97319264	97321915
CUST_37717_PI430048170	0.000707761	15.0427	6.50651	6.29283	6.62536	P	P	P	2.76036	2.74953	2.11053	A	A	A	CUST_37717_PI430048170	0	Coding	TTGCAGGCGAGACCATTACGTAGACTTCCAGGAACTGGGATGGCGGGACTGGATACTGCA	RefSeq	chr12	+	57455312	57458008
CUST_134384_PI430048170	0.0031687	9.08001	4.98788	5.75472	5.4748	P	P	P	2.31802	2.30825	2.13737	A	A	A	CUST_134384_PI430048170	0	Coding	GTGCCAGCTGGATAACTGATGGCATTTGTCTCAAGACAGAAAATAAAAAGCATTTCATTC	RefSeq	chr16	-	20933110	21159441
CUST_138205_PI430048170	0.0117515	2.09693	5.75255	5.37175	5.28874	P	P	P	4.05772	4.70078	4.42212	A	P	A	CUST_138205_PI430048170	0	Coding	GCCTTGCCAAGTATAACTTGTATATCTTGACTCTGTGGTAGATTTCAAGTTCAATGTTAT	RefSeq	chr13	-	52843973	52848640
CUST_55463_PI430048170	4.56881e-05	0.466073	9.05827	8.93679	9.01343	P	P	P	10.0762	10.1503	10.0876	P	P	P	CUST_55463_PI430048170	0	Coding	GGCCAATAAAGACAACCTGATGATCTGAATAATTTGTGACAACTGCCTTGGGTGAAAATC	RefSeq	chr1	+	209756031	209782323
CUST_138638_PI430048170	0.000905592	0.409159	6.65401	6.93685	6.61086	P	P	P	8.13627	7.90021	8.04546	P	P	P	CUST_138638_PI430048170	0	Coding	GCTTTCATCACATTTTCTCTATTCTGACCTCTGTTATGAGAAATAAAAGTCACTGATTCC	RefSeq	chr10	+	89301948	89309276
CUST_136683_PI430048170	0.000958659	0.439162	8.48388	8.36105	8.4694	P	P	P	9.48372	9.62967	9.753	P	P	P	CUST_136683_PI430048170	0	Coding	GTGTAAACAGGGCCATTCTATTTCCTAAATCACAACTAATAAAGCAGAGGATGAAAATCA	RefSeq	chr1	+	87328467	87348923
CUST_130629_PI430048170	0.00535764	3.1546	9.95255	10.0719	9.99763	P	P	P	8.18144	8.19816	8.62706	P	P	P	CUST_130629_PI430048170	0	Coding	AACCCAACGCTTTTTTGGATCAGCTCAGACATATTTCAGTATAAAACAGTTGGAACCACA	RefSeq	chr2	+	71453622	71686763
CUST_127089_PI430048170	0.00500989	2.04483	6.85253	7.00358	6.77128	P	P	P	6.08576	5.74231	5.67908	P	P	P	CUST_127089_PI430048170	0	Coding	CCTCTTTCTCTTGCCCTGGGGAATTTGGGACACAGAATAAAGGTGTTTGCCCACAAAAAA	RefSeq	chr1	+	43172329	43254358
CUST_143322_PI430048170	0.00019493	0.463066	5.84036	5.97767	5.98743	P	P	P	7.06565	6.93063	7.13829	P	P	P	CUST_143322_PI430048170	0	Coding	GACCATTATATTCTACTGTGAGAAGTGCAGTCTGCACTATATTGTTTTAAAAACGAAGAG	RefSeq	chr12	+	109714381	109770507
CUST_144719_PI430048170	0.000371751	0.253903	8.39153	8.30052	8.61113	P	P	P	10.3268	10.4656	10.4574	P	P	P	CUST_144719_PI430048170	0	Coding	ATGGAGGTGTAGGCTGGAGAGACATTGTGGGTGTGTATCTTCTTATCTCATTTCACAAGA	RefSeq	chr19	+	47332146	47342015
CUST_134887_PI430048170	0.00242853	13.0715	8.09751	8.00311	8.25894	P	P	P	4.02856	4.8595	4.22229	A	A	A	CUST_134887_PI430048170	0	Coding	TGGGTCTCTTGAGGGCAGTGGAGTGTCACACAGCTAATAAAGTACACATTTCATGTTGGA	RefSeq	chr17	+	63523333	63546728
CUST_130811_PI430048170	0.00237071	0.439784	6.76949	7.1001	6.71278	P	P	P	7.90536	8.14518	8.10695	P	P	P	CUST_130811_PI430048170	0	Coding	CCATGGTACTGATATTCTCTTCTCAGATAACCAAACAAAAACAGCTGAATAAAATCAACC	RefSeq	chrX	+	41724154	41730135
CUST_65830_PI430048170	0.0142005	0.436164	3.73913	4.06474	4.3988	A	A	P	5.42753	5.18109	5.24904	P	P	P	CUST_65830_PI430048170	0	Coding	ACGCACAGAACACTCATGGATTAAGAATCTACTTAGAAAGCGAACACGGAAGTCCCCTGA	RefSeq	chr2	-	60457193	60553498
CUST_142753_PI430048170	0.0021703	0.49595	9.95973	9.79756	9.94035	P	P	P	10.9022	10.9099	10.926	P	P	P	CUST_142753_PI430048170	0	Coding	GTTCGTTTTTGGTTCTGAGGATGTGATATCCGTACTTACTGATACTAAAGCCAAATTTAA	RefSeq	chr1	+	182789448	182830384
CUST_137634_PI430048170	2.53838e-06	13.7723	9.77455	9.96753	9.81891	P	P	P	6.08241	6.18098	5.94387	P	P	P	CUST_137634_PI430048170	0	Coding	GTAAAAAGGGATATCTATGGATTTCCCTAGGTAGGAGATAACAAGTATGTACCATTACTG	RefSeq	chr8	-	81478496	81483238
CUST_107512_PI430048170	0.00678681	2.26802	13.4774	13.5398	13.4846	P	P	P	12.1082	12.3464	12.4795	P	P	P	CUST_107512_PI430048170	0	Coding	TTCAAGGAAAAGAAAACGAAAACAGTTTAAATCTCTACCACAGCCTCACAAGCAAATGCT	RefSeq	chr8	+	104339795	104356689
CUST_137049_PI430048170	0.0026491	2.80332	8.1202	8.5623	8.54338	P	P	P	7.00124	6.77678	7.01599	P	P	P	CUST_137049_PI430048170	0	Coding	GCACCGCTGCAGCCAGCAGTTGTAAAATTGTTAGTAAACATAGGTATAATTACCAGATAG	RefSeq	chr1	+	209686179	209734950
CUST_142974_PI430048170	0.000277349	0.488448	8.92196	8.99529	9.03026	P	P	P	10.0928	9.9136	10.0385	P	P	P	CUST_142974_PI430048170	0	Coding	GCGCATTGTGCACTGGTTTACTTTAAAATGTACAGATTCTTCTCGTTAAATTCTTGATAG	RefSeq	chr20	-	48624254	48827883
CUST_129873_PI430048170	0.00328339	7.01956	6.7173	6.92509	6.88827	P	P	P	4.21863	4.22211	3.57251	A	A	A	CUST_129873_PI430048170	0	Coding	TTGTTTTACGCTAAAGATGGAAAAGAACTAGGACTGAACTATTTTAAATAAAATATTGGC	RefSeq	chr17	-	4630918	4641665
CUST_129352_PI430048170	5.30733e-05	12.1425	8.0443	7.92167	8.3402	P	P	P	4.4091	4.67101	4.43816	P	P	A	CUST_129352_PI430048170	0	Coding	GGTTGCATTTGGTCAAGATTTTGAATGCTTCCTGACAATCAACTCTAATAGTGCTTAAAA	RefSeq	chr1	+	172659007	172666872
CUST_133582_PI430048170	0.0087766	6.16039	5.12297	4.94371	4.87812	P	P	P	2.04074	2.88868	1.96554	A	A	A	CUST_133582_PI430048170	0	Coding	CTTGGCAAGTTTTCTCCATTTGTTGCAAGTATGTTTACTAGCTGAATCTCAATAACAATG	RefSeq	chr7	-	102812860	103074568
CUST_143292_PI430048170	0.00994147	2.29153	14.6169	14.6522	14.6923	P	P	P	13.2219	13.4415	13.6746	P	P	P	CUST_143292_PI430048170	0	Coding	TAAAAAGCCAGCAAACTATCTTCAAACTCTTCCGTCCTTAATGTCTTCCATGGCTATTGC	RefSeq	chr8	+	104339795	104356689
CUST_138367_PI430048170	1.25369e-05	2.05815	13.0941	13.117	13.0242	P	P	P	11.9821	12.0755	12.0537	P	P	P	CUST_138367_PI430048170	0	Coding	GATCAGCCACACAACTGTTTTGTACATACTTATTTTCTCATGCACTTTTCTGTATGCAAA	RefSeq	chr5	-	39371673	39425233
CUST_140158_PI430048170	0.00155712	3.34286	7.22981	7.50161	7.66699	P	P	P	5.61901	5.76967	5.8127	P	P	P	CUST_140158_PI430048170	0	Coding	GCATCTGTGATAAACTATCAATGAGGCTCCCATCATGCCATTTTTTGTTCATTTTAATCT	RefSeq	chr4	+	119135783	119187789
CUST_136398_PI430048170	7.86881e-05	0.402206	8.05011	7.85749	7.90436	P	P	P	9.35339	9.22328	9.17857	P	P	P	CUST_136398_PI430048170	0	Coding	AGCCCTCCGCAATAATTCACCAGACCAGAAGCCACTGGTGTACAGAGAACACTTAAAAAA	RefSeq	chr20	+	38805704	38923024
CUST_141205_PI430048170	0.000370376	2.57755	9.77133	9.53973	9.83662	P	P	P	8.27274	8.27455	8.50624	P	P	P	CUST_141205_PI430048170	0	Coding	GTGCTCAGTTTGTAGTGATGGGAAGTGTATTTTACTCTGATCAAATAAATAATGCTGGAA	RefSeq	chr8	-	17643793	17800917
CUST_144769_PI430048170	0.000973991	0.28023	6.18417	6.38485	5.97306	P	P	P	8.03581	7.91846	8.11623	P	P	P	CUST_144769_PI430048170	0	Coding	TTTCTCTAGTTCAAGTTCACCAGACTCTATAAATAAAACCTGACAGACCATGACTTTCAA	RefSeq	chr11	+	57597553	57614853
CUST_128150_PI430048170	3.47547e-05	3.80272	9.8792	9.96543	10.0101	P	P	P	8.09513	7.90789	8.06675	P	P	P	CUST_128150_PI430048170	0	Coding	CAGTCTCTCATGGACCTATCTCTATTGTAGAATTATGACTTATGTCTTACTTGCCAAATT	RefSeq	chr4	+	168497065	168928457
CUST_141303_PI430048170	0.00181473	2.09437	8.17421	8.09236	8.27612	P	P	P	7.21706	6.9213	7.19243	P	P	P	CUST_141303_PI430048170	0	Coding	TTGCTGTGAAGAAAAACATGTGTATATATTGCACCTTGAGTTGTCAGAAGGTAGAAACTG	RefSeq	chr16	+	85063211	85094222
CUST_135944_PI430048170	3.94446e-06	3.62513	7.8757	7.9364	7.88911	P	P	P	5.99828	6.03169	6.09613	P	P	P	CUST_135944_PI430048170	0	Coding	GATTTGTAGGGTACTTGGCAGGTTAAATTAAACCAGAAGAGGTGACTTAATAAAAAAGGG	RefSeq	chr1	+	170664171	170739400
CUST_132764_PI430048170	8.3492e-05	3.56134	7.7566	7.53209	7.76624	P	P	P	5.68889	5.92969	5.93745	P	P	P	CUST_132764_PI430048170	0	Coding	CTTTGCCACAGATTCAGTAGCTTTTGGTAAACTTCACTGTTTTTAAAGTACCTTTTGTGT	RefSeq	chr1	+	89558712	89597861
CUST_55456_PI430048170	0.00213771	0.489048	6.08162	6.2868	5.92255	P	P	P	7.0328	7.26963	7.09709	P	P	P	CUST_55456_PI430048170	0	Coding	CTTGGGGAATGAAAAAAGTACTACTGGAGATGGAAGACCAGAAAAACAGCTATGAGCAGA	RefSeq	chr1	+	209756031	209782323
CUST_130483_PI430048170	0.00275629	2.10902	10.5126	10.809	10.7523	P	P	P	9.54585	9.64202	9.67018	P	P	P	CUST_130483_PI430048170	0	Coding	CATCTATTCCATCTGTGAGTGACTCTTTGACATGGAGAGAATTTCACTATATTCAGGCTA	RefSeq	chr7	-	22438418	22500282
CUST_39440_PI430048170	0.0493651	3.84359	5.87801	5.42103	5.99002	P	P	P	4.71663	3.09123	3.03009	P	A	A	CUST_39440_PI430048170	0	Coding	TTTCTTCCCTGTGAAAACAAGAGCAAGGCCGTGGAGCAGGTGAAGAATGCCTTTAATAAG	RefSeq	chr1	-	206767602	206772494
CUST_55147_PI430048170	4.20671e-06	3.92022	8.70194	8.74307	8.7041	P	P	P	6.7505	6.78424	6.70072	P	P	P	CUST_55147_PI430048170	0	Coding	AATAAATTACAAGTGGTCAAGGTTGCATCCTTTTGAGCCCAGGACCTGCTTGTAAGCCGA	RefSeq	chr1	-	175156986	175193093
CUST_98120_PI430048170	1.19097e-05	20.6938	12.0134	12.2745	11.9895	P	P	P	7.73828	7.50973	7.90643	P	P	P	CUST_98120_PI430048170	0	Coding	TAGCCTGCATATCATTCACCCAAAACAAAGTAATAGCGCCTCTTTTATTATTTTGACTGA	RefSeq	chr12	+	85874294	85882992
CUST_137606_PI430048170	0.00579905	0.150763	3.64406	2.98853	3.03065	A	A	A	5.98656	5.97133	5.99145	P	P	P	CUST_137606_PI430048170	0	Coding	ATTTAATGGAAGGTTCCACAAGTCACCCTGTGATCAACAGTACCCGTATGGGACAAAGCT	RefSeq	chr19	-	55364381	55370463
CUST_136759_PI430048170	0.00960934	2.93984	6.23357	6.5075	6.24734	P	P	P	4.91056	4.31985	5.01513	P	A	A	CUST_136759_PI430048170	0	Coding	TGCTACATTCAACCTCGTGACTTCATGATCCTGGGCCTGAGAACACAGGAATGATTCATA	RefSeq	chr19	+	10013248	10022278
CUST_131351_PI430048170	0.00491784	4.48289	5.17125	5.04183	5.33817	P	P	P	3.34509	2.57807	3.04906	A	A	A	CUST_131351_PI430048170	0	Coding	TAAGTCAGCAAACTGCGGGAATACTGTCTCTTCTATGTATTTTGTGAATAGTAAGCATAA	RefSeq	chr7	+	107660634	107717807
CUST_127206_PI430048170	0.000300804	2.05916	12.3794	12.3646	12.5665	P	P	P	11.283	11.4737	11.4297	P	P	P	CUST_127206_PI430048170	0	Coding	GCTTTTATGATATTTGTGTGCAATATCCCCTCTTCCATTGAGGATATTTGATGTAAAGGA	RefSeq	chr5	+	72107290	72209570
CUST_145107_PI430048170	0.0108937	0.484462	4.32578	4.49551	4.91688	P	P	P	5.47745	5.85135	5.58562	P	P	P	CUST_145107_PI430048170	0	Coding	TTCTGATGTTTGTAACCAGACCCAGCTGTGTCATTAAACAGACCCGTTCTTGCTGTACCT	RefSeq	chr17	-	76527347	76537905
CUST_141853_PI430048170	0.0020137	3.46005	7.79438	7.39424	7.3028	P	P	P	5.47049	6.06821	5.5538	P	P	P	CUST_141853_PI430048170	0	Coding	CAAGTACTTTTCTTTCTAAGCTAACCTTTGGGATACATCACAGAGGATACTTGAAAAACA	RefSeq	chr4	-	17632085	17781512
CUST_56021_PI430048170	0.000197026	2.38767	11.9988	12.179	12.0163	P	P	P	10.7445	10.8582	10.829	P	P	P	CUST_56021_PI430048170	0	Coding	TTGAGAAAGGAAGTTCTCGACACCAGAAATGCATCGGAGGACCACAATCAGTTCTATGCT	RefSeq	chr10	-	13643705	14330867
CUST_126899_PI430048170	0.00317616	2.20648	10.0598	9.74886	10.1983	P	P	P	8.83595	8.67439	9.07847	P	P	P	CUST_126899_PI430048170	0	Coding	TTTAGCCTCCACCTTGTCTAAGCTTTGGTCTATAAAGTGCGCTACAGAAATGGCAAAAAA	RefSeq	chr12	-	54292106	54301037
CUST_132566_PI430048170	0.00888006	6.89207	7.01223	6.93225	7.27822	P	P	P	4.31097	3.59442	4.75729	A	A	A	CUST_132566_PI430048170	0	Coding	TTCCAGGGCCTGAGCAGCTGGATCTGGTACAAAGCAATCGGACATAGAGTTGGAGGGGGA	RefSeq	chr1	+	42153420	42155824
CUST_130137_PI430048170	1.56767e-05	7.13297	11.9303	12.0942	12.1417	P	P	P	9.06124	9.27343	9.32324	P	P	P	CUST_130137_PI430048170	0	Coding	ATTCTTTTCCCACCGTTTCTTCCTGTTGATATTCAATGAATCCGTCAATCTCTCTGGAAA	RefSeq	chr17	-	74521173	74531474
CUST_136815_PI430048170	0.000130498	20.112	9.7514	9.6922	9.58511	P	P	P	5.11998	5.37603	5.51964	P	P	P	CUST_136815_PI430048170	0	Coding	TGTCACACCTGAAATGGCTTTGTTTTTATCAATAAATACTTGTTGATTGCGGTAAACAGC	RefSeq	chr12	+	10178957	10191804
CUST_137187_PI430048170	0.000200534	0.23828	6.67998	6.64216	6.50623	P	P	P	8.64519	8.69935	8.69671	P	P	P	CUST_137187_PI430048170	0	Coding	CATGACCAATGTATGTCTATGAACACTGCATTGTTTCAGGTGGACATTTTATCATTTTCA	RefSeq	chr1	+	65992615	66374579
CUST_129408_PI430048170	0.0019802	0.444831	4.38401	4.74441	4.37902	P	P	P	5.66336	5.85646	5.50309	P	P	P	CUST_129408_PI430048170	0	Coding	ACCAGCAGTTGGTATGAAGAACCTTTGACATTTTGTAAAAGGCCATTTCTTGGGAAAAAA	RefSeq	chr20	-	47657405	47786616
CUST_140986_PI430048170	0.00159778	2.49944	12.9049	13.0852	13.2723	P	P	P	11.6651	11.8482	11.8014	P	P	P	CUST_140986_PI430048170	0	Coding	GAAGCCTGTTGGGCCAGAAGACAGAAACTCCAACTGGCAAAAAAGCAAGCATCTAAGAAA	RefSeq	chr4	-	56647987	56681706
CUST_100810_PI430048170	1.96792e-05	2.48682	8.65103	8.58074	8.595	P	P	P	7.22813	7.32966	7.32477	P	P	P	CUST_100810_PI430048170	0	Coding	TTTATCCTTTTTCCCCTGAAGCTCGTAGAGAAATGTGAGTCAAGCGTCAGCCTCACTGTT	RefSeq	chr17	+	3636467	3663103
CUST_136773_PI430048170	6.07613e-05	0.479969	9.51574	9.52708	9.64741	P	P	P	10.5915	10.6875	10.5898	P	P	P	CUST_136773_PI430048170	0	Coding	ATTAAATCTGCCATCTCAGGCCTGGCTGGCTCTTCTGTGCTTTCCACAAATAAAGTTCCT	RefSeq	chr21	+	44353600	44443081
CUST_133119_PI430048170	0.00327179	2.16813	7.93159	7.86513	8.24499	P	P	P	6.91186	7.01056	6.79073	P	P	P	CUST_133119_PI430048170	0	Coding	GCCCGAGGGAGTGCCAAACCGCTTCGCGAGAAATAAAAACGATCCTTTAATCACAAAAAA	RefSeq	chr16	-	8569499	8589838
CUST_69795_PI430048170	0.000829987	0.411498	5.92174	5.7457	5.84162	P	P	P	7.13477	7.13034	7.09207	P	P	P	CUST_69795_PI430048170	0	Coding	AAGACGAGGAGGAAGATGAAGGCAACTGAATCCCAAGAGGCACCTGCAGCCAGGAAGGAA	RefSeq	chr1	+	117001749	117036551
CUST_143702_PI430048170	0.00161442	0.349467	7.54749	7.79423	7.56106	P	P	P	9.15926	9.18927	9.11722	P	P	P	CUST_143702_PI430048170	0	Coding	GACAGTTTATTTGTTGAGAGTGTGACCAAAAGTTACATGTTTGCACCTTTCTAGTTGAAA	RefSeq	chr6	-	131948176	131951378
CUST_129971_PI430048170	0.0170076	0.453562	7.43495	7.10199	7.64922	P	P	P	8.55448	8.58901	8.51545	P	P	P	CUST_129971_PI430048170	0	Coding	AGGTCACACAGCCTAGAAGCTAGAGCAGTGCAGAGTCTGCAAATAAAACCTTAAGTCTGT	RefSeq	chr15	-	40872213	40874289
CUST_127018_PI430048170	0.000191625	2.45927	11.4856	11.433	11.6373	P	P	P	10.1564	10.2214	10.2882	P	P	P	CUST_127018_PI430048170	0	Coding	AGCTGCCTGTGATCTTCTTAGGTTATAGCCAAGTCAGCAACATAATTCCTCTAAATAAAA	RefSeq	chr6	-	110392179	110415550
CUST_135094_PI430048170	0.0257425	2.96865	5.22877	5.53474	5.08779	P	P	P	3.0226	4.12691	3.81818	A	A	A	CUST_135094_PI430048170	0	Coding	GTCTGCTGTGTAGTTACCTGCTTACATGTACAGCCATTTCAATAAATGTATTCTTTTAAC	RefSeq	chr4	-	134196333	134201748
CUST_134848_PI430048170	0.00166088	0.421196	8.01948	8.0089	7.70806	P	P	P	9.15646	9.25989	9.07774	P	P	P	CUST_134848_PI430048170	0	Coding	TTGGTTGATGCCAAGGCAAAAAGATAACTTTTAACAGTTAGAGAGGATCAGTTGCTTAAA	RefSeq	chr9	+	113876281	114056595
CUST_99973_PI430048170	0.00180138	2.44898	8.00103	8.03055	7.85706	P	P	P	6.58547	6.53246	6.87588	P	P	P	CUST_99973_PI430048170	0	Coding	AACCATACTATGGAGTGTGTCAGTATTGTGCACTGTGAGGTCAGTGAATGGAATCCTTGG	RefSeq	chr6	+	127118902	127199481
CUST_134453_PI430048170	0.000711578	2.44809	10.5172	10.2005	10.2991	P	P	P	9.00745	9.17184	8.97303	P	P	P	CUST_134453_PI430048170	0	Coding	TTCTAATCTGTCTGCTCCTTGTTCTACGGATTCCAAACCAAAAGAGGCAAGCAAGTCTGC	RefSeq	chr17_KI270909v1_alt	+	165199	167015
CUST_132450_PI430048170	0.00289923	0.28317	3.61711	3.04382	3.36459	A	A	A	5.04238	5.29766	5.19153	P	P	P	CUST_132450_PI430048170	0	Coding	TCGGTCTCACAAGGACCTCTTAACCCCTCAATAAAGTGTTACATTTCTAAACATTGGAAA	RefSeq	chr19	+	55836577	55881854
CUST_145136_PI430048170	0.000364198	0.322349	8.05832	7.92253	7.95139	P	P	P	9.74268	9.61326	9.4666	P	P	P	CUST_145136_PI430048170	0	Coding	GATACAGAGAACCTCTCAATAAATGATTTGTCGCCTGTCTGACTGATTTACCCTAGGAAA	RefSeq	chr19	+	6887548	6940453
CUST_134849_PI430048170	0.000168537	2.41845	7.67265	7.58079	7.46046	P	P	P	6.33713	6.38954	6.16318	P	P	P	CUST_134849_PI430048170	0	Coding	CCTCCTGAAATGGTTCCCACCCAGAACTAATTTATTTTTTATTAAAGATGGTCATGACAA	RefSeq	chr1	+	150549368	150560936
CUST_145666_PI430048170	0.000720962	0.304241	9.1753	9.44093	9.1638	P	P	P	11.0028	11.1772	10.7333	P	P	P	CUST_145666_PI430048170	0	Coding	CCAAAACTGTCATCCTAACGTTTGTCATTCCAGTTTGAGTTAATGTGCTGAGCATTTTTT	RefSeq	chr4	-	108047544	108168956
CUST_129349_PI430048170	0.000376058	16.2262	10.249	10.2314	10.4844	P	P	P	6.30455	6.58164	5.96699	P	P	P	CUST_129349_PI430048170	0	Coding	TAAAATGATACCTTTCATGTACAGAGCCCTCAATGGGGCCGATTTTCAGTTGTGTAAAAA	RefSeq	chr3	-	50606453	50611831
CUST_129098_PI430048170	7.62661e-06	2.51369	10.8137	10.8339	10.9124	P	P	P	9.54271	9.55041	9.47826	P	P	P	CUST_129098_PI430048170	0	Coding	CACAGAGCAAGGCGGGCAGGGAACGGTTATTTTTCTAAATAAATGCTTTAAAAGAAAAAA	RefSeq	chr14	+	75522440	75546991
CUST_136869_PI430048170	0.00138234	2.10839	8.28348	8.17626	8.44807	P	P	P	7.20073	7.18214	7.30642	P	P	P	CUST_136869_PI430048170	0	Coding	GAAAGACTTTTCCAACCCTCATCACCAACGTCTGTGCCATTTTGTATTTTACTAATAAAA	RefSeq	chr16	+	57372460	57385048
CUST_143408_PI430048170	0.000468975	0.45577	11.6696	11.6096	11.4443	P	P	P	12.6803	12.7885	12.6616	P	P	P	CUST_143408_PI430048170	0	Coding	AGAATGTGTTGGTTTACCAGTGACACCCCATATTCATCACAAAATTAAAGCAAGAAGTCC	RefSeq	chr11	+	5689586	5710863
CUST_132641_PI430048170	0.0017021	0.406786	6.09601	6.25786	5.86093	P	P	P	7.50808	7.29655	7.32107	P	P	P	CUST_132641_PI430048170	0	Coding	AGTGGCTGCCAGTAGCAGACTGTTAAATTGTGGTTTATATACTTTTTGCATTGTAAATAG	RefSeq	chr11	-	27365960	27472787
CUST_135029_PI430048170	0.00266053	0.473324	9.5376	9.37844	9.64617	P	P	P	10.6052	10.6454	10.5602	P	P	P	CUST_135029_PI430048170	0	Coding	CGCTTGTTTTTCTCCTTTTGGTGTAATGTTTTACAAATCCTTTGGCCTGAGAACTAATAT	RefSeq	chr6	+	33621378	33696571
CUST_129821_PI430048170	0.00419309	12.2993	6.15406	6.02762	6.13201	P	P	P	2.19509	2.95244	2.1624	A	A	A	CUST_129821_PI430048170	0	Coding	GGTTCATGTTTACATGCCTTTCGATAGCTGTTTGTGCATACTTAAAGATGATCAAAATGA	RefSeq	chr7	+	102912896	102945109
CUST_95875_PI430048170	0.00345685	3.05508	5.85612	5.79268	5.97205	P	P	P	3.9748	4.44038	4.33751	A	P	A	CUST_95875_PI430048170	0	Coding	AGAAGAGAATGTATCACTGCTGACTTTTATTCCAATATTTGGATGGAGTAAGTTTTAGGG	RefSeq	chr7	+	134779412	134970729
CUST_141451_PI430048170	0.000113084	3.04542	10.6272	10.5637	10.8107	P	P	P	8.96253	9.07357	9.15095	P	P	P	CUST_141451_PI430048170	0	Coding	GAAAGAGTGTTGGTGTTGGCTGGGGTGTCAATAAAGCTGTGCTTGGGGTCGCTGAAAAAA	RefSeq	chr12	+	53097651	53102344
CUST_135017_PI430048170	0.00230715	0.408231	6.76606	6.61905	6.35985	P	P	P	7.95274	7.93229	7.75869	P	P	P	CUST_135017_PI430048170	0	Coding	TTTTTAATTGCCAAACTGCTCTCTTCATCAGCTCAGCACATGCTTTAAGAAAGCAAAACC	RefSeq	chr11	+	46277637	46321422
CUST_70120_PI430048170	0.00109146	2.77054	6.57377	6.81391	6.52979	P	P	P	5.17544	5.37491	4.94053	P	P	P	CUST_70120_PI430048170	0	Coding	GAAGGCCAAGGAATATAGTTTACAGAGGAACCAGGTGCCAACAGTCAACTGAGGAAAAAA	RefSeq	chr1	+	170664171	170739400
CUST_141232_PI430048170	0.00378762	0.311948	9.39694	9.35041	9.66673	P	P	P	11.4947	10.8925	11.0172	M	P	P	CUST_141232_PI430048170	0	Coding	CGCCCCTCGCAGAGAGTGTATCATCTGTTTTATTTTTGTAAAAACAAAGTGCTAAATAAT	RefSeq	chr21	+	33025907	33029195
CUST_52468_PI430048170	0.00373339	48.6529	8.57592	8.80611	8.59647	P	P	P	3.49613	3.19373	2.19099	A	A	A	CUST_52468_PI430048170	0	Coding	CACAGCTATTGACTCTATTTTCTGAAGGCAAAAATGCATGTTTGTTAGAATGGAAACAGA	RefSeq	chr1	+	77282601	77559969
CUST_130900_PI430048170	1.60722e-05	24.7812	6.85932	7.29907	7.1607	P	P	P	2.31385	2.36504	2.7421	A	A	A	CUST_130900_PI430048170	0	Coding	TTTCTGTGAAATAAAGACTTTTTGTATTTCTGGGGCTGAGGCTCAGCAACAGCCCCTCAG	RefSeq	chr1	-	47183588	47190099
CUST_141873_PI430048170	2.04843e-05	0.449782	8.69961	8.66294	8.77817	P	P	P	9.8273	9.9151	9.85746	P	P	P	CUST_141873_PI430048170	0	Coding	GTCCGAAGCTGCCAGGAAGAAGAACAGAACTTTGTGTGTTTATTTCATGATAAAGTGATT	RefSeq	chrY	+	1336615	1382689
CUST_100813_PI430048170	0.0190688	0.454792	5.39322	4.76842	5.36116	P	P	P	6.18901	6.36538	6.44803	P	P	P	CUST_100813_PI430048170	0	Coding	TCAGATGCCTGTAATGTGTGACTTTATGTGTGTCTGTGTTGTTTTGAAGAGAATAAAGGA	RefSeq	chr15	+	51751560	51816361
CUST_126930_PI430048170	0.0174712	0.491675	6.76308	6.80723	6.17879	P	P	P	7.65269	7.83401	7.38039	P	P	P	CUST_126930_PI430048170	0	Coding	GCAAGTGTTGTAGACTAACAAAGATACTCCAAAATACAATGGCTTAAAGAATGTGGTCAT	RefSeq	chr11	+	63507986	63516774
CUST_142281_PI430048170	0.000427925	0.355868	7.44163	7.27181	7.61955	P	P	P	9.00532	8.78604	9.0225	P	P	P	CUST_142281_PI430048170	0	Coding	GGCAATTTTAATCCCCTGCACTAGGCAGGTAATAATAAAGGTTGAGTTTTCCACAAAAAA	RefSeq	chr6_GL000251v2_alt	+	2362381	2379927
CUST_67273_PI430048170	0.0256948	0.495343	5.36152	5.37275	4.68879	P	P	P	6.19667	6.38656	5.94721	P	P	P	CUST_67273_PI430048170	0	Coding	TAAGCCAGATCTGCCAGTGAGCCTCAGGCTTTAGGAACTGAAGAGTGTTTCTGAAAGATC	RefSeq	chr14	+	51860303	51969800
CUST_128824_PI430048170	0.000400592	2.58417	8.39676	8.1978	8.41276	P	P	P	6.90219	6.97783	7.0253	P	P	P	CUST_128824_PI430048170	0	Coding	TTGAAAATGATTACTGGGATCAAAGTACATTCATGTCGCAATTACAGAGAGAGAGAGAAA	RefSeq	chr12	+	27696494	27697633
CUST_135538_PI430048170	0.00235559	2.0783	8.73254	8.79058	8.77266	P	P	P	7.65066	7.63212	7.83825	P	P	P	CUST_135538_PI430048170	0	Coding	TGAGGTCTATGTACCTTAATCTCGTTTCTCCTTACCACAATCTTAAATAGATTTCAGCTG	RefSeq	chr4	-	47847232	47914557
CUST_140061_PI430048170	0.000630033	0.413841	6.80815	6.89381	6.63903	P	P	P	7.98002	8.10637	8.08162	P	P	P	CUST_140061_PI430048170	0	Coding	ACTGCTATCGCTATTTAAGAACCCTAAATCTGTCACCCATAATAAAGCTGATTTGAAGTG	RefSeq	chr6_GL000256v2_alt	-	3511047	3540275
CUST_93398_PI430048170	0.00514224	4.54815	5.12569	5.4058	5.27006	P	P	P	3.49625	2.80445	2.85028	A	A	A	CUST_93398_PI430048170	0	Coding	TTTGGATGCTTTGCTACATGTCGTGGTAGCCCATGGATGCTGAAACTGTATGCCATGTTT	RefSeq	chrX	+	38561477	38688918
CUST_114340_PI430048170	0.0166932	0.375451	3.35627	4.10926	3.43331	A	A	A	4.52269	5.25608	5.35104	P	P	P	CUST_114340_PI430048170	0	Coding	TTTCTGGATGGATGGCTGCGGTTATGGATAAAGGCTGTAACTGTTAACACAGAAAAACAT	RefSeq	chr6	+	46652914	46678190
CUST_117474_PI430048170	6.68364e-05	2.15117	9.30365	9.39509	9.45431	P	P	P	8.23762	8.22781	8.3717	P	P	P	CUST_117474_PI430048170	0	Coding	CCAAAGAGAAACGAGCAGTAAACAGTCTCAGCATGGAAAATGCCAACCAAGAAAATGAAG	RefSeq	chrX	-	103062652	103064240
CUST_144444_PI430048170	0.000801706	0.434605	9.28583	9.46892	9.5912	P	P	P	10.6466	10.7546	10.5611	P	P	P	CUST_144444_PI430048170	0	Coding	CTTGCCCTTTCTTACCTAGAACACCTGCTATAGTAAAGCAGACAGGAAACTGTTAAAAAA	RefSeq	chr18	+	45825579	45842556
CUST_144221_PI430048170	0.00013181	2.46838	9.94601	9.74248	9.84702	P	P	P	8.47273	8.60916	8.54687	P	P	P	CUST_144221_PI430048170	0	Coding	CTGTTCAACGTGTAAAGAGACCTGATGTTTTCCCTAATAAAGCTGATAACAGATTTTGCA	RefSeq	chr9	-	98732008	98796512
CUST_79495_PI430048170	5.56708e-05	3.09013	11.5892	11.6529	11.6753	P	P	P	10.0251	10.0825	9.92365	P	P	P	CUST_79495_PI430048170	0	Coding	AAATGTTTTACAACCTGAACCTCAGAACTGTGATCCTCCAAGGAGCGCGCTACTTGAAGA	RefSeq	chr8	-	8784488	8893621
CUST_101895_PI430048170	5.17933e-05	26.0062	10.1137	10.0542	10.085	P	P	P	5.26243	5.44009	5.44143	P	P	P	CUST_101895_PI430048170	0	Coding	TGTGGCAATACAGTAGTTATTAAGCCAGCAGAGCAAACACCACTCAGTGCACTCTACATG	RefSeq	chr15	-	57953423	58065923
CUST_143888_PI430048170	2.91247e-05	4.74734	8.27745	8.40428	8.42675	P	P	P	6.08929	6.11183	6.16927	P	P	P	CUST_143888_PI430048170	0	Coding	GCTGGAGCTCTCAAACTAAAAGACATTTGTTATTTTGGAAAGAAGAAAGACTCTATTCTC	RefSeq	chr3	+	155080289	155183729
CUST_143844_PI430048170	3.43583e-05	0.428565	7.56869	7.57201	7.44374	P	P	P	8.79735	8.76868	8.68707	P	P	P	CUST_143844_PI430048170	0	Coding	CCTCAGAGGGCACCTGGAGGCAGCAAAGATTATCTTATTTATTTTATTTTGTTTTCTGCT	RefSeq	chr15	-	41899440	41972557
CUST_80161_PI430048170	0.00739859	2.30628	14.5079	14.4558	14.5651	P	P	P	13.1023	13.2506	13.5284	P	P	P	CUST_80161_PI430048170	0	Coding	ATGTAAAAAGCCAGCAAACTATCTTCAAACTCTTCCGTCCTTAATGTCTTCCATGGCTAT	RefSeq	chr8	+	104339795	104356689
CUST_129051_PI430048170	1.18679e-05	6.3866	13.0962	13.1144	13.3233	P	P	P	10.3728	10.5429	10.595	P	P	P	CUST_129051_PI430048170	0	Coding	CATTGCTCTTTAGTGTGTGTTAACCTGTGGTTTGAAAGAAATGCTCTTGTACATTAACAA	RefSeq	chr9	+	99821854	99866891
CUST_144457_PI430048170	0.00194781	0.447915	6.60975	6.87868	6.92405	P	P	P	8.04071	7.9881	7.87437	P	P	P	CUST_144457_PI430048170	0	Coding	GTCATTTCAGGTAAATATGACAAGTGGTGGAGCATGAAGTTTTCTAATTTGACTTAATCC	RefSeq	chr3	-	143265221	143848531
CUST_72396_PI430048170	0.00116389	3.14069	7.44745	7.53676	7.49613	P	P	P	5.68533	5.97079	5.85814	P	P	P	CUST_72396_PI430048170	0	Coding	TCCACAGCTATTCCCTCCAGCATCTGGTTCTGTACAAAAATTAAATGCTTATTTGTTTAA	RefSeq	chr22	-	37469062	37486440
CUST_132115_PI430048170	0.00282877	0.410655	4.14866	3.78282	3.68636	P	A	A	5.06548	5.34548	5.08379	P	P	P	CUST_132115_PI430048170	0	Coding	AGGTGCAATTTTTAATCCTTTGAAATTAGCCAGCCAGACCTAATGCTAAGGTAAATGTAA	RefSeq	chr15	+	51751560	51816361
CUST_136523_PI430048170	0.00866732	0.442606	6.24904	6.55367	6.80891	P	P	P	7.81473	7.7835	7.58445	P	P	P	CUST_136523_PI430048170	0	Coding	AACCATTGTAGGTTTTTAGCAATGTGTATCTGTGTGTCCCTCACACCTTTTCCTATTCTA	RefSeq	chr1	+	157993272	158100262
CUST_133936_PI430048170	0.00102115	0.422267	6.65029	6.75825	6.61805	P	P	P	7.91126	7.9232	7.92716	P	P	P	CUST_133936_PI430048170	0	Coding	GTTGGTCCTATTTGTAAATCCCACACCCGGTGTATCCAATAAAGTGAAACAAAGCATGTG	RefSeq	chr9	-	91722595	91950162
CUST_100322_PI430048170	3.18974e-05	0.486885	8.95901	8.8896	8.85299	P	P	P	9.95732	9.89774	9.96269	P	P	P	CUST_100322_PI430048170	0	Coding	GAGGGAACAAGGAACAGAATCAAGATCTTCTACTCCTCTGCCAACAATTTCTTCTTCAGC	RefSeq	chr12	+	98515572	98550379
CUST_129937_PI430048170	0.00219124	3.03171	10.8188	10.7177	10.9227	P	P	P	9.04126	9.11842	9.46952	P	P	P	CUST_129937_PI430048170	0	Coding	ATTCTATGTCTGTAAAAACCAACAAAGGCATTGGACTTGTGTGAATGTACAGGGTTTTTT	RefSeq	chr8	+	17497087	17570568
CUST_5528_PI430048170	0.000333183	0.215077	5.31346	4.89524	5.14392	P	P	P	7.19825	7.44203	7.38286	P	P	P	CUST_5528_PI430048170	0	Coding	TCCTCTGTCAACATCAAAGAGCACATTTACCAGTATAGCTTGCATAGTCAATATTTGGTA	RefSeq	chr11	-	104994239	105023168
CUST_51716_PI430048170	0.00149101	3.5214	11.3657	11.2145	11.5445	P	P	P	9.56409	9.51837	9.61122	P	P	P	CUST_51716_PI430048170	0	Coding	GGTGTGCTGTGGTGCACTGCAGTGATGTATTTGCATAACATTGTTTGATAGTGAAAAATT	RefSeq	chr1	+	89558712	89597861
CUST_136244_PI430048170	3.56035e-06	40.1166	13.8081	13.8849	14.0665	P	P	P	8.46548	8.51961	8.78736	P	P	P	CUST_136244_PI430048170	0	Coding	CTGGCAACAACAGATTCTCTTGGCTCATATTTCTTTTCTTTCTCATCTTGATGATGATCG	RefSeq	chr18	-	63655196	63661963
CUST_145186_PI430048170	0.000169794	0.316629	11.1613	11.2029	11.0445	P	P	P	12.7882	12.7688	12.833	P	P	P	CUST_145186_PI430048170	0	Coding	GTTCTCTATGACTAACAGTTATTAAGTCGGTTGTGTATATGTGTAACTAATGTAACTGCC	RefSeq	chr15	+	80404349	80597936
CUST_141823_PI430048170	2.32413e-05	0.312837	9.99044	10.0439	10.1418	P	P	P	11.6474	11.7245	11.8319	P	P	P	CUST_141823_PI430048170	0	Coding	AATCTGCACACACAACGAACAGTTGCATTTCAGAGAGTTCTCTCAATTTGTAAGTTATTT	RefSeq	chr2	+	236569736	236582351
CUST_29408_PI430048170	0.000253073	2.14376	9.86267	9.7204	9.83776	P	P	P	8.64297	8.64384	8.82947	P	P	P	CUST_29408_PI430048170	0	Coding	TGAGCTGTCCAAATTTCATCTTAAAGTGGATCATTTGACTCTGAAACACGATTCTCATGG	RefSeq	chr16	+	66880479	66891099
CUST_108797_PI430048170	0.00028314	26.4677	10.6327	10.5487	10.5024	P	P	P	5.98542	5.57373	5.91647	P	P	P	CUST_108797_PI430048170	0	Coding	GCATTTTACCAGATGTTTTGATGTTATCGCTTATGTTAATAGTAATTCCCGTACGTGTTC	RefSeq	chr8	-	41261956	41309471
CUST_59477_PI430048170	1.7593e-05	0.271883	7.13556	7.03785	6.96524	P	P	P	8.95606	8.96443	8.85763	P	P	P	CUST_59477_PI430048170	0	Coding	TGGCCACTCAGCACATTTCATGGAGGTCATGTCTTTTCACTGATACTTTTTTGATAGTTT	RefSeq	chr12	+	105330635	105371518
CUST_140012_PI430048170	0.0011562	2.01184	13.1348	13.1736	13.3826	P	P	P	12.2118	12.1571	12.3052	P	P	P	CUST_140012_PI430048170	0	Coding	ACCCCACTTTAGAAAGGGTCGTCACTCCTTTAATCCTCTACTCAACAATGTACTCTTTTA	RefSeq	chr9	-	33441153	33447633
CUST_138526_PI430048170	0.0068345	2.55269	11.1597	11.262	11.7326	P	P	P	9.87164	10.1135	10.1633	P	P	P	CUST_138526_PI430048170	0	Coding	AATGGTATCTGGGCGGAGCTCACAGAGTTCTTGGAATAAAAGCAACCTCAGAACACTTTG	RefSeq	chr19	+	8364126	8374375
CUST_127575_PI430048170	0.0464973	2.32421	11.0383	11.0756	10.2023	P	P	P	9.73605	9.6048	9.46943	P	P	P	CUST_127575_PI430048170	0	Coding	GACAAAACCAAACTTCTCAGAAAACAACATGAGATTGGCATGGCTTTATTTGTTTTCTTG	RefSeq	chr2	+	130611532	130658037
CUST_135650_PI430048170	0.00181407	0.467088	9.59324	9.33076	9.25675	P	P	P	10.3857	10.3803	10.7068	P	P	P	CUST_135650_PI430048170	0	Coding	AAATGACCAAAACACACACACACATTTACAATGGACTGCTGGTGCAGAAGAATAAACAAC	RefSeq	chr2	+	10721648	10785110
CUST_139309_PI430048170	0.0309185	2.25596	4.69264	4.66294	5.49037	P	P	P	3.40801	3.94135	4.0567	A	A	A	CUST_139309_PI430048170	0	Coding	AAACCTGAGCTTGAAGTCCTTTTCCCCAAAAAGAGGGAAGAGTCACAAAAAGTCCAGACC	RefSeq	chr20	-	45123425	45124465
CUST_114098_PI430048170	0.000843995	3.43544	7.42214	7.88326	7.82096	P	P	P	6.1646	5.70731	5.91854	P	P	P	CUST_114098_PI430048170	0	Coding	GGAGTGGGAAGAAAACCTCAAAGTGGTTCATACTTGCCTGTAAAAAGTAAATGCATTTTA	RefSeq	chr7	-	47987148	48029119
CUST_129343_PI430048170	0.00322472	0.190877	7.68455	7.73443	7.20304	P	P	P	10.0246	9.94006	9.8787	P	P	P	CUST_129343_PI430048170	0	Coding	GGATACTGGCAAAAGTGCACATATTTCATAACCAAATTAGTAGCACCAGTCTTAATTTGA	RefSeq	chr4	-	76033686	76036197
CUST_43588_PI430048170	0.0101065	2.37669	6.07963	6.09461	5.8512	P	P	P	4.99093	4.84455	4.39013	P	P	A	CUST_43588_PI430048170	0	Coding	GGGTGTTCCATTCTTCCGCAATCTCAGAAAAATGGGACTAAAAGAAACTATTTTGTAAAA	RefSeq	chr3	+	183253243	183273391
CUST_134813_PI430048170	0.00456563	0.473041	5.9579	5.73081	5.5878	P	P	P	6.78282	6.82997	6.92433	P	P	P	CUST_134813_PI430048170	0	Coding	GTTAGCGAGCACCTTTTGACCAGTAATAAAAAACCTTGGCTTTGGAGTTTTCCACTGAAA	RefSeq	chr22	+	30694805	30907824
CUST_141081_PI430048170	0.00395977	0.466515	10.3398	10.2343	10.2153	P	P	P	11.4807	11.4355	11.1554	P	P	P	CUST_141081_PI430048170	0	Coding	GGTGAAGTTTGTATGTTTACCTAATATTACCTGTTTTGTATACCTGAGAGCCTGCTATGT	RefSeq	chr7	-	497259	519844
CUST_129574_PI430048170	3.15179e-05	4.9269	7.9968	8.0848	8.25295	P	P	P	5.65582	5.9233	5.8521	P	P	P	CUST_129574_PI430048170	0	Coding	CTGTTTTGGAATGCAGCTATGAGTGGGGGTGATACAATGTGTTCAATATAATAGAATAAA	RefSeq	chr8	+	57994553	58149718
CUST_137390_PI430048170	0.000111997	2.95404	7.83356	7.90724	8.08733	P	P	P	6.2438	6.44858	6.45002	P	P	P	CUST_137390_PI430048170	0	Coding	CTTGTGTGTTGTAGCTCATTTGTTTCAAGAGAGAATCAACAGATCATATTCAGTGTCTTG	RefSeq	chrX	+	9465160	9719740
CUST_105301_PI430048170	0.0036473	2.7793	7.97591	7.81273	8.2522	P	P	P	6.51745	6.48915	6.64016	P	P	P	CUST_105301_PI430048170	0	Coding	AAGAATGGACGTGCTGGGACCAACTCAAGACCTTGTTTTGCTGTCTTCATCATCTTACCT	RefSeq	chr11	-	76657523	76670000
CUST_136049_PI430048170	0.00176605	3.73641	8.46574	8.55366	8.53539	P	P	P	6.43775	6.59406	6.79694	P	P	P	CUST_136049_PI430048170	0	Coding	CTCATATTGGGGTTCGACAGGTAAACACAAACTGCTATTTCAGTAGAAAAAGTTATTGTT	RefSeq	chr10	-	126012384	126388558
CUST_136896_PI430048170	0.000670882	0.178873	10.0135	10.1855	9.60055	P	P	P	12.5979	12.4623	12.2247	P	P	P	CUST_136896_PI430048170	0	Coding	GCTACCTACATACAATTCCAAACACATACAGGAAGGTAGAAATATCTGAAAATGTATGTG	RefSeq	chr4	-	76021115	76023536
CUST_134088_PI430048170	0.00115183	2.81753	8.58445	8.64016	8.40463	P	P	P	6.80663	7.13038	7.19053	P	P	P	CUST_134088_PI430048170	0	Coding	GTAAGGATATACTTAGCTACATTTTCAGTCAGTATGAACTTCCTGATACAAATGTAGGGA	RefSeq	chr1	+	186828899	186988981
CUST_139670_PI430048170	0.000294867	4.68284	10.0277	9.87088	10.2338	P	P	P	7.73572	7.62214	8.07591	P	P	P	CUST_139670_PI430048170	0	Coding	ATCCTGACTTTCTAGCCATTAATAAAGAGAACTGCTCCTAGCACCTCAGCCTCTAAAAAA	RefSeq	chr14	+	24070836	24078100
CUST_128237_PI430048170	8.86609e-06	0.251088	7.60851	7.46553	7.49918	P	P	P	9.49828	9.4803	9.57787	P	P	P	CUST_128237_PI430048170	0	Coding	CGGCATAAAAAGTAACCCTCAAGTGAAGTGTCTCTATACTGTTTTATAGAGTACTTTAAC	RefSeq	chr15	+	47718488	47774223
CUST_134738_PI430048170	0.000258083	0.287461	6.57288	6.83018	6.7544	P	P	P	8.45765	8.51401	8.59038	P	P	P	CUST_134738_PI430048170	0	Coding	TCACCTATCAACAGATCATCCTGCTTGACTGTAACAAAATAAATAGTGTCTCTTCAAGTG	RefSeq	chrX	+	9786455	9949441
CUST_132435_PI430048170	0.00035422	6.24085	10.5266	10.7384	10.4704	P	P	P	7.64473	8.0729	8.06642	P	P	P	CUST_132435_PI430048170	0	Coding	GGTGGATCCATTTCAAGTATTTATGCAAATGTGTCTCTGAACTAAAGTGTGATCTTATGC	RefSeq	chr11	-	130404922	130428644
CUST_128639_PI430048170	0.0023768	2.14382	6.47581	6.85535	6.78226	P	P	P	5.40192	5.77927	5.63426	P	P	P	CUST_128639_PI430048170	0	Coding	GATCTTCACAAGCACATTCATCTCTTCCTACTCTGAACAGTAGTTATTTAGGTTTTTGCT	RefSeq	chr1	+	158353695	158357553
CUST_127805_PI430048170	0.000317044	4.63721	7.59116	7.92883	7.92404	P	P	P	5.36104	5.84397	5.58394	P	P	P	CUST_127805_PI430048170	0	Coding	GTGGGAAGAAAACCTCAAAGTGGTTCATACTTGCCTGTAAAAAGTAAATGCATTTTACTA	RefSeq	chr7	-	47987148	48029119
CUST_129907_PI430048170	0.000538225	4.93943	7.95404	8.24559	8.46358	P	P	P	5.7565	5.95231	6.06905	P	P	P	CUST_129907_PI430048170	0	Coding	TGCTGACAACTTCCAGAGAAGCCATGGTTTTTTGTATTGGTCATAACTCAGCCCTTTGGG	RefSeq	chr11	+	117986390	118001483
CUST_132444_PI430048170	0.00258286	0.36734	7.6734	7.79738	7.51711	P	P	P	9.10694	9.13563	9.09304	P	P	P	CUST_132444_PI430048170	0	Coding	ATCTCGGACCAGGAGGCTGTGGCCGCCATTGAGAAGTTCGTGGATGATGAGAAGATCCTG	RefSeq	chr12	-	113392445	113403887
CUST_61804_PI430048170	0.00300785	2.14405	6.65816	6.28013	6.62802	P	P	P	5.57439	5.39678	5.31123	P	P	P	CUST_61804_PI430048170	0	Coding	ATGACTCAAGATTCCCAGGAGTTCTGCTCATTCTAATGATGGCCCATTCTACTTGCTCTG	RefSeq	chr15	+	43593053	43599406
CUST_129002_PI430048170	0.000269477	0.379108	11.8136	11.7599	11.9322	P	P	P	13.0908	13.2512	13.3549	P	P	P	CUST_129002_PI430048170	0	Coding	ATGCATCCCATGTCTTTGGGTACTAGTGTATGAATTCTAATCTCTGTAAATGAAATGTTG	RefSeq	chr9	-	114784634	114806128
CUST_135702_PI430048170	0.000313598	2.24413	8.97805	9.09382	9.12085	P	P	P	7.81978	7.83984	8.02919	P	P	P	CUST_135702_PI430048170	0	Coding	TTTTCTCCTGCATTGTGACTCACGAAATTGACCGCTACACAGCAATTGCCTATTGGGTAC	RefSeq	chr6_GL000256v2_alt	-	4347848	4352360
CUST_145583_PI430048170	0.00237824	2.65266	4.88457	4.83569	5.31544	P	P	P	3.8531	3.53158	3.44586	A	A	A	CUST_145583_PI430048170	0	Coding	TGACATGTAAATGCACCTGCACCGTTTCTGAGCCGGGAGAGTGTTTACTTAAAATCATGC	RefSeq	chr7	-	151428831	151440170
CUST_131986_PI430048170	0.000255854	0.315608	7.50708	7.43853	7.35311	P	P	P	9.20086	9.14037	8.94028	P	P	P	CUST_131986_PI430048170	0	Coding	TGCTCTCCTGGTTTCTGTGCAGGCGGGTTGATTAAAGATGGTGTTTTCTTCTCTAAAAAA	RefSeq	chr1	-	31179744	31239887
CUST_133869_PI430048170	0.000532719	2.88106	7.47794	7.537	7.32647	P	P	P	5.96393	5.88396	5.92071	P	P	P	CUST_133869_PI430048170	0	Coding	CTGGGGCAGAGGATAGGGAATCTCTTATTAAAACTAACATGAAATATGTGTTGTTTTCAT	RefSeq	chr11	-	124753122	124762327
CUST_131045_PI430048170	2.42598e-05	3.55336	12.5728	12.7491	12.6332	P	P	P	10.7044	10.8625	10.8989	P	P	P	CUST_131045_PI430048170	0	Coding	CTGAAACTAAGCACCTGGTGATCTTTAGTTTGAGATGTCTATATGGTACTTTTGAGTTAT	RefSeq	chr12	+	29149002	29335616
CUST_137277_PI430048170	0.0127961	0.285853	2.87947	3.04869	3.66001	A	A	A	5.14503	4.96695	5.01131	P	P	P	CUST_137277_PI430048170	0	Coding	AAATAAAGGTACTTCTGGGCAGCCAGGCTGCACAGCATTTGCTTTCCTCTGAGATTCTAA	RefSeq	chr6	+	46793356	46839782
CUST_142017_PI430048170	0.00452248	2.11809	8.34051	8.66606	8.81373	P	P	P	7.32424	7.62299	7.64299	P	P	P	CUST_142017_PI430048170	0	Coding	ATTGCTACTGGATTCTTAACTAGAGAAAACTTACAGAACAGGTGTTAAGCCTTTTCCAAT	RefSeq	chr7	+	48035510	48061297
CUST_55274_PI430048170	0.000158024	0.459361	8.91561	8.9238	8.80547	P	P	P	9.97173	10.0073	10.035	P	P	P	CUST_55274_PI430048170	0	Coding	GTACCAAAAACTTTTGAAAACTATGCAGTCCAACAACAGTTTCTGACTACAACTCAAAAG	RefSeq	chr1	+	192636137	192660310
CUST_133961_PI430048170	0.0148072	2.20797	6.86433	6.77153	7.08222	P	P	P	5.35991	5.85577	6.01443	P	P	P	CUST_133961_PI430048170	0	Coding	TATGCCGGTTGAGAGAACTAAAATGGTTATAGTATTGTTTATCAGAAAGAGGAAGTGTAC	RefSeq	chr18	-	31622245	31684723
CUST_128044_PI430048170	0.000520151	2.96947	12.5531	12.6941	12.9055	P	P	P	11.0202	11.2125	11.2225	P	P	P	CUST_128044_PI430048170	0	Coding	GTCACCCTTAGCCCTTCAGATAAGCCTAGCCAGTACATATTTCAGCACAGGCAGTTTTTT	RefSeq	chr1	+	161721543	161728143
CUST_137562_PI430048170	0.00208485	2.46634	9.99269	9.69252	10.0819	P	P	P	8.56444	8.41029	8.87415	P	P	P	CUST_137562_PI430048170	0	Coding	GCGGTAGCTATTTGTTTACATGCAGATTTTTGTAATAAAGGCTATTTCCTGATAGTCATG	RefSeq	chr16	-	66921678	66925536
CUST_143239_PI430048170	0.0135141	2.79114	5.00386	5.1734	4.8036	P	P	P	3.00203	3.7821	3.66243	A	A	A	CUST_143239_PI430048170	0	Coding	TGCTGTTGGTGAATAAATCAGTCTACTGGAACTCCAAGGACTGGATGTAAGCAGATCTTT	RefSeq	chr19	-	49289634	49325217
CUST_140422_PI430048170	0.00018684	2.10699	6.45811	6.45643	6.45346	P	P	P	5.391	5.40074	5.35022	P	P	P	CUST_140422_PI430048170	0	Coding	CCTGCTTTGTTCATTCTCTGTATTCAAAATTAACAGATCATGCTGAAAACCACTCAAACG	RefSeq	chr2	-	187464230	187554492
CUST_105906_PI430048170	0.00277035	0.281993	5.75268	6.07625	5.70882	P	P	P	7.51695	8.03335	7.41622	P	P	P	CUST_105906_PI430048170	0	Coding	ATTCTAGCAGCTGAACCATCCACCATATGTGCAGGAGAGTCATTTCAAGTTGTCGTGAGA	RefSeq	chr2	+	69013143	69249327
CUST_119741_PI430048170	0.00724889	2.11652	7.28714	7.21978	7.21102	P	P	P	6.11486	5.98412	6.35089	P	P	P	CUST_119741_PI430048170	0	Coding	ATTGGCTTTGCTTTTGGAGCCTTATACTGGAAGAAGAGACAGCCAAGTCTTACAAGGGCA	RefSeq	chr12	-	88492792	88580473
CUST_129359_PI430048170	0.00718998	0.386135	3.76376	3.7944	4.39823	A	A	P	5.6669	5.29067	5.16071	P	P	P	CUST_129359_PI430048170	0	Coding	CAGCCCCTGAGCAGGGAGAGAGAAGTTTTGTTGGCATAGGTTTGCTTAGGTAGCCGGCTT	RefSeq	chr1	-	11648360	11654831
CUST_140264_PI430048170	0.000452821	0.406103	8.39299	8.24148	8.22874	P	P	P	9.59386	9.62274	9.55184	P	P	P	CUST_140264_PI430048170	0	Coding	CCAAGAGCCTAGAATGACATGGCCCTTCTCAGCAGTAATAACAGATGGTCTCAGCGCCTC	RefSeq	chr15	-	41848145	41894077
CUST_128632_PI430048170	0.0005813	0.391348	6.19793	5.92251	6.0886	P	P	P	7.34037	7.46783	7.47071	P	P	P	CUST_128632_PI430048170	0	Coding	AATGACTCCATCTGGGATTCAGAATACAGTGTTCTCAAGTGAAGAAGGCTTGGAACCCAC	RefSeq	chr19	-	3474406	3480542
CUST_132583_PI430048170	0.00047941	0.366552	5.42747	5.6387	5.65574	P	P	P	7.02203	7.18906	6.8451	P	P	P	CUST_132583_PI430048170	0	Coding	GTCTCTTTCAGTCTACATTTTTGTTTAATACGCTTGAGCAATAAACGCTGACTTGCAGAC	RefSeq	chr22	-	50059390	50085929
CUST_137600_PI430048170	0.000833302	3.15632	8.85652	8.93211	9.02322	P	P	P	7.09015	7.43762	7.29322	P	P	P	CUST_137600_PI430048170	0	Coding	GTTCTTTGCTCTTGTGGTAATAATTAAAAAATGGTCCATCCCTTGTCCTCTGACATTAAA	RefSeq	chr14	+	60981113	61083733
CUST_145027_PI430048170	0.000231634	0.366219	10.1565	10.1512	9.97108	P	P	P	11.6026	11.4945	11.535	P	P	P	CUST_145027_PI430048170	0	Coding	CAAATTCTGCATCTCCAGAGGAAAATAAGAAATAAAGATGAATTGTTGCAACTCTTCCCA	RefSeq	chr14_KI270847v1_alt	+	1225376	1231261
CUST_132748_PI430048170	1.23467e-05	34.5509	8.75276	8.64726	8.89212	P	P	P	3.86645	3.57037	3.50789	A	A	A	CUST_132748_PI430048170	0	Coding	ACTTCGGCTAGGGAGGAAGGTAGAGTAAGAGGTTGAAGATAACAGAGTGCAAAGTTTCCT	RefSeq	chr19	-	51410020	51417803
CUST_78689_PI430048170	9.24698e-06	0.324391	10.678	10.8152	10.7233	P	P	P	12.3139	12.3313	12.4438	P	P	P	CUST_78689_PI430048170	0	Coding	AGACGACGTCACAGGCTACTTCCCGTCCATGTACCTGCAAAAGTCAGGGCAAGACGTGTC	RefSeq	chr7	+	74773961	74789376
CUST_126853_PI430048170	6.10303e-06	0.0463266	2.10522	2.1876	2.2618	A	A	A	6.5813	6.65352	6.61919	P	P	P	CUST_126853_PI430048170	0	Coding	GAAAGCAGCAATTTGCTGTTCTCAACCATTCTTTCAAGGCTTTTCATTGTTCAAAGTTAA	RefSeq	chr6	-	116118921	116126133
CUST_131696_PI430048170	0.000282026	2.25495	14.8639	15.0209	15.0265	P	P	P	13.7596	13.7837	13.8529	P	P	P	CUST_131696_PI430048170	0	Coding	CGACGTTTTATCAAAGGCCCCCTTTCTATGTTCATGTTAGTTTTGCTCCTTCTGTGTTTT	RefSeq	chr21	+	45981748	46005049
CUST_140621_PI430048170	0.0492391	0.494381	5.42182	5.13237	4.46424	P	P	A	5.8396	6.14729	6.21259	P	P	P	CUST_140621_PI430048170	0	Coding	AAACATATAAGAGGCTCCCTCTTAACACGGCACTTAGATACGTGCTATTCCACCTTTCCT	RefSeq	chr19_KI270938v1_alt	+	707065	719117
CUST_139080_PI430048170	0.010498	0.202643	3.99063	2.74219	3.75006	P	A	A	5.39655	6.09375	6.07553	P	P	P	CUST_139080_PI430048170	0	Coding	AAGGGTACCTGACATTCTAAGATATCAAGACACTTAATATGTGGGCTATTAGCTGCTTAT	RefSeq	chr18_GL383571v1_alt	-	152308	162457
CUST_93062_PI430048170	7.63173e-05	2.27036	7.70823	7.85715	7.78441	P	P	P	6.50305	6.6172	6.67913	P	P	P	CUST_93062_PI430048170	0	Coding	CTTAATCCGGAAGAGAATCCACCTGAGACCTGAGGACGCCTTATTCTTCTTTGTCAACAA	RefSeq	chr12	+	10212889	10223125
CUST_129968_PI430048170	0.0100107	2.04447	5.16026	4.97057	5.00345	P	P	P	3.78649	4.2755	3.94023	A	P	A	CUST_129968_PI430048170	0	Coding	AAGATGAAGGAAATCACTGAGACAGTGACCAACACAGTCACAAATGCCATCACCCATGCA	RefSeq	chr10	+	87020288	87024730
CUST_136128_PI430048170	0.000769708	0.42669	10.0187	9.97634	10.1516	P	P	P	11.2857	11.2475	11.3049	P	P	P	CUST_136128_PI430048170	0	Coding	AGGTTTGGGTACATTACAGCTTGGGTTTTCCAACTGACTTAGGATTTCTGACTTTTTATT	RefSeq	chr1	+	209756031	209782323
CUST_145478_PI430048170	0.000850388	0.366893	6.29843	6.114	6.13482	P	P	P	7.43853	7.6462	7.78814	P	P	P	CUST_145478_PI430048170	0	Coding	CTTCCAGAATCAATAATCCGTGGCAACATATCTCTGTAAAAACAAACACTGTAACTTCTA	RefSeq	chr3	+	113211464	113287463
CUST_142504_PI430048170	0.000548379	0.468112	6.41469	6.46494	6.56872	P	P	P	7.48038	7.53033	7.71632	P	P	P	CUST_142504_PI430048170	0	Coding	TCTGAGCCATGTGAAGCACGTCTCCGTTGTGTTAATTTATTTCAATGTAGCTTATTTTCT	RefSeq	chr2	-	236165235	236168009
CUST_92311_PI430048170	0.000734779	2.7639	10.8052	10.8815	11.1757	P	P	P	9.27098	9.59306	9.60144	P	P	P	CUST_92311_PI430048170	0	Coding	CTTCCAGAGCCCTGGTCCTGGGATCCCAGAAACAGCATCTGTTGTGGCTATCACAGTCCA	RefSeq	chr1	+	161706971	161714352
CUST_127434_PI430048170	0.00429227	2.63805	5.25327	4.96637	5.42643	P	P	P	3.87531	3.72315	3.88059	A	A	A	CUST_127434_PI430048170	0	Coding	GAGGGGGACTGACACTGATTTTTCATTTGAAATCAGCCACTTAAATCTCTTTCCATACAA	RefSeq	chr12	+	123762494	123935720
CUST_132937_PI430048170	2.69172e-05	0.396724	8.74719	8.78007	8.64509	P	P	P	10.0863	10.1168	9.96991	P	P	P	CUST_132937_PI430048170	0	Coding	AAGTGTTAGTGCTTCCAGGCGGCACTGACAGCCTCAGTAACAATAAAAACAATGGTAGCT	RefSeq	chr6	-	36366193	36387800
CUST_135226_PI430048170	0.000685471	2.57815	7.64746	7.56705	7.30375	P	P	P	6.04505	6.29571	6.08781	P	P	P	CUST_135226_PI430048170	0	Coding	TGGGAGCAACATGAATGTTCTACAAAAGTTTAAAGCAGAGATTGTTTCAAATGGGTGTAG	RefSeq	chr2	+	102356282	102398775
CUST_133974_PI430048170	0.000405294	0.402105	10.2764	10.5765	10.4811	P	P	P	11.791	11.8665	11.6252	P	P	P	CUST_133974_PI430048170	0	Coding	CATAATACCATGCTATAGGAGACTGGGCAAAACCTGTACAATGACAACCCTGGAAGTTGC	RefSeq	chr2	+	69013143	69249327
CUST_106225_PI430048170	7.66675e-06	3.43403	10.8591	10.9961	10.9508	P	P	P	9.14154	9.23627	9.08786	P	P	P	CUST_106225_PI430048170	0	Coding	GGAAGCATGGACGAGAACATGGAGCAAATGTTTTACAACCTGAACCTCAGAACTGTGATC	RefSeq	chr8	-	8784488	8893621
CUST_105899_PI430048170	2.15063e-05	0.348862	8.59301	8.67662	8.51485	P	P	P	10.1884	10.0849	10.0706	P	P	P	CUST_105899_PI430048170	0	Coding	TTTCACCACTTTGAAGACAGGAGTGTGAAGTCAAAGTCTATAAAGCAGAATGTCTGCCTG	RefSeq	chr5	-	131806990	131945698
CUST_129769_PI430048170	0.000250267	0.395151	8.54241	8.59126	8.33591	P	P	P	9.92897	9.84269	9.72155	P	P	P	CUST_129769_PI430048170	0	Coding	CAGTGCTCCTGTAAGTCAAATGTGTGCTTTGTACTGCTGTTGTTGAAATTGATGTTACTG	RefSeq	chr17	+	34319046	34321402
CUST_131146_PI430048170	0.00145055	15.3075	7.8105	8.0446	8.06493	P	P	P	4.28779	3.54106	4.18866	A	A	A	CUST_131146_PI430048170	0	Coding	CCAAATTATAGAACAAAAATAAGCCAAAGGATTGGAGTGTTTCAAACACATGCTTTCGTC	RefSeq	chr17	-	5208920	5234860
CUST_126765_PI430048170	0.000226356	4.29139	11.2008	11.1038	11.4144	P	P	P	9.04293	9.19474	9.1896	P	P	P	CUST_126765_PI430048170	0	Coding	TAACCTGTGACCAGTCTGACCCTTACAGCCTCTGACTTAAGCTGCCTCAAGGAATTTTTT	RefSeq	chr1	+	43300894	43323110
CUST_142594_PI430048170	7.27757e-05	0.334884	7.58999	7.44421	7.45942	P	P	P	9.03076	8.99316	9.20042	P	P	P	CUST_142594_PI430048170	0	Coding	TGTGCACGTGTATAGCTCAAAGAGCTTAGACTTCAAATATATCTGGTGAATGACTCTTTG	RefSeq	chr6	-	46220729	46325892
CUST_127012_PI430048170	0.00201437	3.02294	6.75278	7.22458	6.90537	P	P	P	5.2414	5.39236	5.49103	P	P	P	CUST_127012_PI430048170	0	Coding	AGAGACGCTCCAGATTTTATTCTTATCCCATTTATGCTACTGTGTGTAATAAAATGCCCA	RefSeq	chr14	+	20999254	21001875
CUST_141791_PI430048170	0.00738448	2.8482	8.18893	7.80867	8.40745	P	P	P	6.43887	6.32241	7.06185	P	P	P	CUST_141791_PI430048170	0	Coding	GAAAGCCTATTCCAGCGTTCTTTACTGCCGTTTAAATAAAGAATCATACATCTGAAAGTG	RefSeq	chr1	+	212624446	212626778
CUST_138143_PI430048170	0.000526449	2.13712	10.0389	10.1503	9.94172	P	P	P	9.01662	9.03255	8.78984	P	P	P	CUST_138143_PI430048170	0	Coding	GAGAGGCAGCATTTGTTTTCCAGTTAAAACTCTACCTCATTGTGATTATTATCCAATACA	RefSeq	chr19	-	51642552	51646879
CUST_132911_PI430048170	0.000867057	0.250269	7.12581	7.23084	6.85498	P	P	P	9.04627	9.16915	9.01236	P	P	P	CUST_132911_PI430048170	0	Coding	TGCTAACTGGATAAAGTTTGTGCAGCACATTCCTGAGTGTACGATATTGACCTGTAGCCC	RefSeq	chr9	-	137299630	137302251
CUST_93303_PI430048170	0.00775666	4.08692	5.09496	5.05071	5.52226	P	P	P	3.41978	3.46502	2.57853	A	A	A	CUST_93303_PI430048170	0	Coding	TGTTGCTCCCGTTATGCGGACAGAAGACAGCCCCAGGGAACAAATGCTAGGAAATGGCAG	RefSeq	chr3	+	50611861	50649297
CUST_136134_PI430048170	0.0260478	0.496647	4.61722	5.18521	5.26199	P	P	P	5.98811	5.97774	6.19855	P	P	P	CUST_136134_PI430048170	0	Coding	TGGGTCTTGCAGTTTTTCAGGAGGCCTTGATTAAAATGCAAATACTTGTCTGAGAAAAAA	RefSeq	chr17	+	44004663	44009068
CUST_132883_PI430048170	0.02218	2.09375	5.65793	5.86413	5.86089	P	P	P	4.57158	4.44406	5.09367	P	P	P	CUST_132883_PI430048170	0	Coding	TCCTAACAGGAGGGGTGTAATGTGACATTGTTCATACTTGCTAATAAATACATTATTGCC	RefSeq	chr8	-	20144854	20183206
CUST_138521_PI430048170	0.00063653	0.310971	7.54483	7.45999	7.44879	P	P	P	9.15429	9.03781	9.30629	P	P	P	CUST_138521_PI430048170	0	Coding	ATCTGAACAAACTATGCAATACCACCTGCTCCCTTCCAGGAGCATTTTAATAAAAGATTT	RefSeq	chr15	-	65053336	65068112
CUST_137349_PI430048170	0.0027034	2.39549	15.1387	15.1145	15.1682	P	P	P	13.7635	13.8421	14.0229	P	P	P	CUST_137349_PI430048170	0	Coding	GCTCCTGGAACTTATTTATATGCCTCAAAATCCTCTAAACTCATTTATAGTAACCCATAG	RefSeq	chr20	-	46541030	46550574
CUST_143600_PI430048170	0.00219454	0.480741	5.53854	5.18309	5.40901	P	P	P	6.27322	6.38359	6.64095	P	P	P	CUST_143600_PI430048170	0	Coding	TTCCGATGGCTAGAAAAATGCAAAACACAGTGGATATCATTGCATCTATTTTCATGTCTT	RefSeq	chr5	-	161288428	161548124
CUST_142033_PI430048170	0.000139634	0.498873	11.44	11.4976	11.4687	P	P	P	12.5383	12.4309	12.4451	P	P	P	CUST_142033_PI430048170	0	Coding	AAAGCGAGTGTTAGGTTGGTTAGAGGGTTTAATATTTTCTGCAATGGTTTGTAGGAATTT	RefSeq	chr12	+	50924750	50932517
CUST_142039_PI430048170	0.0156605	2.71386	6.73428	6.49674	6.87455	P	P	P	4.80583	5.19992	5.67292	P	P	P	CUST_142039_PI430048170	0	Coding	AAGAGCCTTTATACAATTGGACGCATTTTGGTTTTTCCTCATTGAGAATTCAAATCCTCT	RefSeq	chr16	+	69105563	69117667
CUST_91681_PI430048170	0.00379603	2.31023	6.26817	5.82689	6.08906	P	P	P	4.77353	4.8239	4.98755	P	P	P	CUST_91681_PI430048170	0	Coding	AAATAAATACCAATGGCTGCAAATTGACCTTGGAGAGAGAATGGAGGTCACTGCTGTCGC	RefSeq	chr9	-	39072766	39288303
CUST_134509_PI430048170	0.00040364	4.46445	4.52212	4.71909	4.84146	P	P	P	2.61265	2.71225	2.26253	A	A	A	CUST_134509_PI430048170	0	Coding	GAGTGTTGCAAATGTGTTCTTTGTCCTGTTATATGTATATCAGGAATACAAGGATGTGAA	RefSeq	chr10	+	17809342	17911162
CUST_63832_PI430048170	0.000226087	2.39599	7.80186	7.74796	7.9046	P	P	P	6.53385	6.60037	6.54183	P	P	P	CUST_63832_PI430048170	0	Coding	TCTAGAGAAACTTGTGTAGCTTTGACTGATTGCCTTAATCTCTTCACCAAACAAGAAGGG	RefSeq	chr18	-	24162045	24397869
CUST_98405_PI430048170	0.00146752	0.471257	11.144	10.984	10.9437	P	P	P	12.0831	12.1491	12.1028	P	P	P	CUST_98405_PI430048170	0	Coding	CCCATGGGTTTTGATTGTGTCTAAGCTATGATGACCTTCATATAATCAGCATAAACATAA	RefSeq	chr2	+	6877664	6898232
CUST_129779_PI430048170	0.000282065	0.283037	7.93348	7.83036	7.56543	P	P	P	9.38779	9.68313	9.72301	P	P	P	CUST_129779_PI430048170	0	Coding	GTCTATTTTGAGACTGCTAAAGCTATTAATTGATACTGTGTTTTTATGCCCAAATCCCAG	RefSeq	chr4	+	74158111	74303097
CUST_141921_PI430048170	0.00755	2.76496	4.88206	4.7596	4.54234	P	P	P	3.43197	3.45143	2.83946	A	A	A	CUST_141921_PI430048170	0	Coding	GTGCTGTGGAAATGGAAGAAACCATCTTCACAGACTGTAGGAGAATTCAACATATAATTT	RefSeq	chr8	+	84183350	84921843
CUST_134259_PI430048170	6.38192e-05	3.28457	12.9131	12.8974	13.0804	P	P	P	11.1071	11.34	11.2935	P	P	P	CUST_134259_PI430048170	0	Coding	ATTGTGTTTTGAGGTTTCCTTCAGACAGATTCCAGGCGATGTGCAAGTGTATGCACGTGT	RefSeq	chr16	+	31259966	31332892
CUST_130377_PI430048170	0.00171604	2.05241	10.7124	10.7501	10.6114	P	P	P	9.63908	9.80015	9.51171	P	P	P	CUST_130377_PI430048170	0	Coding	GGGACTTAAACTGCTGAATTCACCTGTGGATGTTTTTGAGTAAATAAAAGCTAATAGCTA	RefSeq	chr1	-	111499428	111504121
CUST_126652_PI430048170	3.18653e-05	7.97982	12.6143	12.8945	12.7284	P	P	P	9.85057	9.84782	9.54235	P	P	P	CUST_126652_PI430048170	0	Coding	GAGGAATGTATATGTTGGCTGTTTTTCCCCAACATCTCAATAAAACTTTGAAAGCAGAAA	RefSeq	chr2	-	216859458	216860059
CUST_142462_PI430048170	0.0370908	0.256573	3.62048	4.11769	2.51245	A	A	A	5.82097	5.34828	5.34222	P	P	P	CUST_142462_PI430048170	0	Coding	CCTACAGGTGCATACTGTTCTGCTTTTCCAATAAATACGAGCGGCGATTTCAACCACAAA	RefSeq	chr10	-	12896624	13099773
CUST_145298_PI430048170	0.0384292	0.251677	2.62123	4.22695	3.80579	A	A	A	5.69259	5.91116	5.41012	P	P	P	CUST_145298_PI430048170	0	Coding	CTGTATGATGTTTGTAAGACCATGTTTGTAAGACATGAATAAATTGCTGCTTTTGCCCAA	RefSeq	chr18	-	43267891	43277650
CUST_130548_PI430048170	0.000208356	2.78101	7.56972	7.28634	7.39419	P	P	P	5.96954	5.81905	6.04033	P	P	P	CUST_130548_PI430048170	0	Coding	CCGGTTTTGAATGTGGAGTGTTTGTGTGTGTTCCTTTTTTAAATTAAGTTATTCCCTCAA	RefSeq	chr10	+	71396933	71815947
CUST_138158_PI430048170	0.00190521	0.475225	8.04982	8.03609	7.88422	P	P	P	9.08106	9.06491	9.04973	P	P	P	CUST_138158_PI430048170	0	Coding	AAAGAATCTGTCTACCAACTCCTCATAGTGAGCCAGAAGCAGCCTCATAACCCTGAATGT	RefSeq	chr1	-	39758230	39788861
CUST_133600_PI430048170	0.00306963	3.38858	12.9217	12.949	12.8757	P	P	P	10.9538	11.1428	11.3426	P	P	P	CUST_133600_PI430048170	0	Coding	CTGGTAACATCGTTGCAACCACTGCAATATCTTCGTTAGTAATCTGTATAATACTTTGTA	RefSeq	chr6	-	88139865	88166048
CUST_127506_PI430048170	0.000234286	0.339936	5.38996	5.19891	5.47511	P	P	P	6.89647	7.01407	6.83114	P	P	P	CUST_127506_PI430048170	0	Coding	GTGTAGCAATGATTGTTGCTAGGCTACAGAGTTGTATATGTAATGTATAGCTGAAATCAT	RefSeq	chr13	-	43213529	43786980
CUST_132728_PI430048170	0.000137547	3.0552	7.6565	7.67459	7.77358	P	P	P	6.09238	6.19648	5.97639	P	P	P	CUST_132728_PI430048170	0	Coding	TTAGAGAGTGCATTGGTGAGGATTCTTTTGACTGCAAGTAACAAAATAAAATGGTGGCAA	RefSeq	chr19	-	51331540	51342124
CUST_130595_PI430048170	0.00372933	0.360552	7.07262	7.1889	6.7013	P	P	P	8.44016	8.37589	8.59658	P	P	P	CUST_130595_PI430048170	0	Coding	GTGTACCTCAGCTTTTTCCCTCACTTGCATCAATAAAGCTTCTGTGTTTGGAACAGCTAA	RefSeq	chr9	+	114329788	114333256
CUST_133070_PI430048170	2.73153e-05	0.271718	7.21971	7.11957	7.24693	P	P	P	9.08767	8.97144	9.1632	P	P	P	CUST_133070_PI430048170	0	Coding	ATCTGTCTCTCTTGAAGACCTCATGACACCGGAGATGGCAAAGGAGAGATATGAAGATTA	RefSeq	chr22	-	32149531	32159256
CUST_123024_PI430048170	0.0496161	0.363016	2.37412	3.27039	3.69941	A	A	A	4.50951	4.62858	4.86458	P	P	P	CUST_123024_PI430048170	0	Coding	CCACTTCTTGGAGTAGAAGCCGACAGAGAGCTGTTTGGAAACTTCTCCTTCACACACCAG	RefSeq	chr4	+	40196906	40244764
CUST_126901_PI430048170	0.00132434	2.18021	7.27264	7.26045	7.26037	P	P	P	6.10858	6.08445	6.22322	P	P	P	CUST_126901_PI430048170	0	Coding	GCTACCCACCTGTGTTTCTTAGCATTTCAGGAATTAAACCACATTCAGAACCCCAAAAAA	RefSeq	chr9	+	88991408	89005154
CUST_128728_PI430048170	0.000288749	0.496184	11.5674	11.4612	11.6552	P	P	P	12.6397	12.5137	12.5673	P	P	P	CUST_128728_PI430048170	0	Coding	CACCAGGATAAGTGACACCTAGGACCCAGGAAATAAATGCCGATGATTTGTGTGAAAAAA	RefSeq	chr20	+	44531780	44619037
CUST_141494_PI430048170	0.00101973	0.419755	4.56354	4.46868	4.20524	P	P	P	5.72719	5.76954	5.50788	P	P	P	CUST_141494_PI430048170	0	Coding	GGAAGTTTGTTGGTCTTTATTAGATAAATTTCCAGAGACCTGTCCATAATACCCAACAGA	RefSeq	chr14	-	104937253	104978357
CUST_90643_PI430048170	0.000262216	0.463916	11.7082	11.9202	11.8115	P	P	P	12.9068	12.8607	13.0008	P	P	P	CUST_90643_PI430048170	0	Coding	CTTCGCCTTGCTCTTGAAAGTGCAGTATTTTTCTACATCATGTCAAGAATGATTCAATGT	RefSeq	chr8	+	24384284	24406013
CUST_116120_PI430048170	1.99809e-05	6.02721	7.4386	7.64667	7.6562	P	P	P	4.89222	5.02823	5.05177	P	P	P	CUST_116120_PI430048170	0	Coding	GGTTCACATTTTGGAAATCAGAGATTACAGATTACATGGCCATAGCTTATCTGTGTTAAA	RefSeq	chr14	+	103928479	104052667
CUST_130608_PI430048170	0.0102372	0.479301	4.08648	4.38729	4.57981	P	P	P	5.52657	5.39154	5.35497	P	P	P	CUST_130608_PI430048170	0	Coding	TTGTCCTTTTCTGCTATCACCTTCCTCTTGTCAGAATGAATATAGACACTGTATCTAAGT	RefSeq	chr2	+	200586007	200671494
CUST_101526_PI430048170	0.000157518	0.426011	9.62862	9.75619	9.69857	P	P	P	10.9792	10.9829	10.8105	P	P	P	CUST_101526_PI430048170	0	Coding	CCACCCAGAGTTAGACATTGTTTTTGTAGAAAACAGGCATTTATTATGTCTAGGGTTTTG	RefSeq	chr15	-	41899440	41972557
CUST_134786_PI430048170	0.000113788	0.489285	6.70973	6.67411	6.83429	P	P	P	7.74938	7.86304	7.69952	P	P	P	CUST_134786_PI430048170	0	Coding	CCCCCTGTGCATAGTACGACCTTTACTGTCGTATTTTTGAAAAATTAAAAATACAGTGTT	RefSeq	chr15	-	68301703	68432153
CUST_32801_PI430048170	0.00119218	2.04015	7.23824	7.09143	7.35256	P	P	P	6.37708	6.14383	6.06893	P	P	P	CUST_32801_PI430048170	0	Coding	TTGAACCAGTAGCCATAAGCTGGGGTAGACCCTGTCCAGTCCTGTCGGGGGTAGGAGAAA	RefSeq	chr19	+	51415905	51417425
CUST_137100_PI430048170	0.00192936	0.498598	5.58652	5.38417	5.26593	P	P	P	6.31625	6.44057	6.50404	P	P	P	CUST_137100_PI430048170	0	Coding	TAACAGTTTGTGTAACATTTATTATGATTTTACATAAATGAGCATCTACCATTCCAAAGC	RefSeq	chr15	-	78759202	78811431
CUST_51426_PI430048170	0.00253342	0.329333	6.98159	6.9273	6.53967	P	P	P	8.30861	8.51806	8.45997	P	P	P	CUST_51426_PI430048170	0	Coding	TTACACCCCAAAGAGTGTGCCCCATGGTGATGAAAATAAAGTGAACATGTTGCAAAATGA	RefSeq	chrX	+	152759217	152760222
CUST_143457_PI430048170	0.00246681	2.83599	6.47854	6.38028	6.74299	P	P	P	5.07536	5.07335	4.96351	P	P	P	CUST_143457_PI430048170	0	Coding	GTTAATAATTGTGGGGTTTTAGATGAGAAAATGGCTATAAAGCTGTGGCCCTACTTTATT	RefSeq	chr9	-	39072766	39288303
CUST_143525_PI430048170	0.0378515	0.386187	3.34955	3.64786	2.62609	A	A	A	4.5847	4.57286	4.75718	P	P	P	CUST_143525_PI430048170	0	Coding	GCCAACCTTTGTATGGAGATGATTTTATAACCATGCACTTTTGTAACTGTGCAGAATTTT	RefSeq	chr11	+	57181746	57191714
CUST_136743_PI430048170	7.22412e-05	2.78674	8.48121	8.29683	8.30438	P	P	P	6.96424	6.81101	6.87498	P	P	P	CUST_136743_PI430048170	0	Coding	TTGTTGTTGCGAAAGCTAATTCCCTAGTATGAATAAACTTCAGACCTTGCTCTCAAAAAA	RefSeq	chr15	-	43232594	43266857
CUST_131124_PI430048170	0.00393613	0.232927	5.24457	5.19405	4.8035	P	P	P	7.12837	7.585	6.75351	P	P	P	CUST_131124_PI430048170	0	Coding	GGGTCACAGAGGCCAAATGTGAGAGCATTGAATAAATATCTTAAGCTAAGCTGCAAAAAA	RefSeq	chr19	-	39863322	39934626
CUST_77761_PI430048170	0.0492694	0.481869	3.62248	4.23819	3.30263	A	A	A	4.84036	4.93616	4.69697	P	P	P	CUST_77761_PI430048170	0	Coding	AATTATTTACCAGGCACACAAGAGACTGGGGAACAGATGGGCAGAAATCGCAAAGCTACT	RefSeq	chr6	+	135181314	135219173
CUST_128571_PI430048170	0.000529781	2.35153	6.14429	6.2948	6.39943	P	P	P	5.22304	4.95715	4.95187	P	P	P	CUST_128571_PI430048170	0	Coding	GCGGGTTCAACATGTCCTCTTTCAAGTTAAAAGAATAAAAGACTTCCAGCCGAGAAAAAA	RefSeq	chr22	-	37570245	37580017
CUST_132407_PI430048170	0.000847508	2.77333	7.37576	7.59816	7.62456	P	P	P	6.12885	6.02519	6.0401	P	P	P	CUST_132407_PI430048170	0	Coding	TTGTAGACCTTCCACATCTGGCTGTCAGATCTTAAGGTTGTGAATTTAGGCTCCAGTTAC	RefSeq	chr8	-	8784488	8893621
CUST_127058_PI430048170	0.00310817	2.31921	7.09183	7.12804	7.25581	P	P	P	5.88223	5.77656	6.15441	P	P	P	CUST_127058_PI430048170	0	Coding	TGAATTTCTCAAGCCATTAGGAGAGAGAGAAATTGGGAGTGGTCCCCAAAGACCCTTCAA	RefSeq	chr12	-	52821446	52834293
CUST_131695_PI430048170	0.000798486	2.50786	8.1596	8.19308	8.40673	P	P	P	6.75071	6.90505	7.1138	P	P	P	CUST_131695_PI430048170	0	Coding	ACTGGATGGAGCTGTTCATTGACACCTTTAAGCTGGTGCACAGGGACATCGTGGGGGACC	RefSeq	chr21	+	46098118	46129805
CUST_144913_PI430048170	0.00383143	0.463681	6.57522	6.1996	6.16752	P	P	P	7.35305	7.34908	7.58979	P	P	P	CUST_144913_PI430048170	0	Coding	CGGTTGTAAACAGTACACATGTCATTTTGTGATATAGGACTCCCAAATAAAAGTATCAGA	RefSeq	chr10	-	29457347	29634972
CUST_127868_PI430048170	5.76423e-05	0.152908	4.34523	4.68333	4.45416	A	A	A	7.22796	7.37902	6.99935	P	P	P	CUST_127868_PI430048170	0	Coding	GACAACTGAGCAGCCTCTGGAGAGGGGCCATTAATAAAGCTCAACATCATTGGCAAAAAA	RefSeq	chr2	+	118942168	118994660
CUST_99443_PI430048170	0.00347547	0.309558	6.49087	6.70026	6.24111	P	P	P	8.24072	8.19344	8.10642	P	P	P	CUST_99443_PI430048170	0	Coding	TCAATTTTACCCTGAGGTCACTGCTAGAGACGCTGATCCATAAAGACAATCACTGCCAAC	RefSeq	chr4	-	108047544	108168956
CUST_141629_PI430048170	0.011918	2.13224	6.40733	6.43871	6.14481	P	P	P	4.86462	5.42697	5.37573	P	P	P	CUST_141629_PI430048170	0	Coding	CTTTCTGGGATAACATGGTGAGCTATATGGTGGTAATCCACACACACAAAAATAAAAGCC	RefSeq	chr5	-	55935096	55994993
CUST_134568_PI430048170	2.23368e-05	0.386986	7.91169	7.76395	7.8156	P	P	P	9.17521	9.15494	9.27124	P	P	P	CUST_134568_PI430048170	0	Coding	GGGCTCTGAGATAATAGTAGATCCAACAGCATGCTACTATTAAATACAGCAAGAAACTGC	RefSeq	chr8	+	32548209	32765040
CUST_133015_PI430048170	0.00181753	0.4848	9.82251	9.97161	9.9613	P	P	P	10.8812	11.1376	10.858	P	P	P	CUST_133015_PI430048170	0	Coding	GGAAAATTATTATTATGAACCTTCAGCCTACTTTCTTGAGTGCCGTAAAAGTGCTTGTAA	RefSeq	chr6	+	148747134	149076990
CUST_132856_PI430048170	1.14728e-05	6.81241	7.2247	7.47636	7.40373	P	P	P	4.55792	4.73472	4.50926	P	P	A	CUST_132856_PI430048170	0	Coding	CTCCTCACTCCCTGCATTGGAGGGAGTGTCATTTTAAGGGACATTTTTATGACTTTTATG	RefSeq	chr17	+	63477060	63498380
CUST_61731_PI430048170	0.00158743	2.04325	7.74401	7.70557	7.7891	P	P	P	6.6486	6.84382	6.6458	P	P	P	CUST_61731_PI430048170	0	Coding	ATGTAACCTTCATCATGTAAAGCAATCGCAAAGCAAGGGGGAAGTTTGCAGAGCATGCCA	RefSeq	chr15	-	36891020	37100140
CUST_126891_PI430048170	0.000462201	0.281101	3.49879	3.13387	3.09717	A	A	A	5.21382	5.15106	4.86983	P	P	P	CUST_126891_PI430048170	0	Coding	CACCATCCAACTCATTGAGTCTTATGGTTCACATCTTGTTTCCTATAGAAATATTCTGTA	RefSeq	chr22	+	29438582	29442455
CUST_143650_PI430048170	0.00170327	2.17111	9.17196	9.43992	9.43738	P	P	P	8.14889	8.26503	8.29215	P	P	P	CUST_143650_PI430048170	0	Coding	AAGTTCTATGGCTGTCACCTTAATTACTCAATAAACTTGCTGGTGTTCTGTGGACGTAAA	RefSeq	chr3	-	120628167	120682571
CUST_132537_PI430048170	1.21278e-06	9.27153	10.3863	10.4105	10.5438	P	P	P	7.14559	7.30559	7.25144	P	P	P	CUST_132537_PI430048170	0	Coding	GTTTTTCAATAAAAGTGTCCTCCTCTTTCTGTGAGAGTCCTGAGTCCCTCAGTGGAGCAA	RefSeq	chr19	-	7739994	7747578
CUST_145612_PI430048170	0.000396235	2.23975	6.0295	5.94401	6.14049	P	P	P	5.01916	4.76253	4.83682	P	P	P	CUST_145612_PI430048170	0	Coding	TACCCAGTCCTTTCAAGGGGCCTCTTTTCTACTAATAAAGATGGATCAAGTCTCAAAAAA	RefSeq	chr15	+	33968887	34065086
CUST_129884_PI430048170	0.00907863	2.78038	7.30165	7.06473	7.7187	P	P	P	6.02994	5.77041	5.92433	P	P	P	CUST_129884_PI430048170	0	Coding	ATTTACATTTCTGTTACAGTCAGCCCAGGAGGTTACAGTGAGCTCTCCACTAAGAATCTG	RefSeq	chr3	+	108302484	108378284
CUST_134772_PI430048170	0.0021845	2.27337	9.70712	9.73699	9.93138	P	P	P	8.44652	8.52693	8.82917	P	P	P	CUST_134772_PI430048170	0	Coding	GCTATTTATTGTACTGAGAGTGGTGTCTGGATATATTCCTTTTGTCTTCATCACTTTCTG	RefSeq	chr17	+	47733243	47746119
CUST_138687_PI430048170	0.000626651	2.91448	9.23187	9.13818	9.50286	P	P	P	7.78338	7.61214	7.86178	P	P	P	CUST_138687_PI430048170	0	Coding	TTTACTGTGACACTTTTTACTTTTTCAATAAACGTGACTCCCAGGTGAGGGGGCCTGGGT	RefSeq	chr17	-	81833491	81835050
CUST_138667_PI430048170	0.00114696	0.367656	6.47035	6.45308	6.08163	P	P	P	7.82467	7.92018	7.60554	P	P	P	CUST_138667_PI430048170	0	Coding	CTTCCCCACCGTAAACTATGGACTCTAGTTCAGTTTTATATGCAATGGATCACTATTTTA	RefSeq	chr5	+	73120560	73131817
CUST_68916_PI430048170	2.59502e-06	0.469777	8.33547	8.37556	8.31173	P	P	P	9.4292	9.45654	9.40718	P	P	P	CUST_68916_PI430048170	0	Coding	CTTCCAAGCTACTTGGAGTAGGGACAAAATATCTTGGCTCACGTATTTAAGAGCCTGAAT	RefSeq	chr1	-	89181147	89198950
CUST_144380_PI430048170	0.0104881	0.490433	6.76899	7.03363	6.44847	P	P	P	7.91574	7.87047	7.58578	P	P	P	CUST_144380_PI430048170	0	Coding	AAGGGTTTGCACTGGTCTTGAGTGTTGTGCTTTTCTGTGTTGTGTGTTTTGATTTTTGTC	RefSeq	chr5	+	172641265	172691530
CUST_145569_PI430048170	0.000300288	4.68349	10.5337	10.9241	10.7898	P	P	P	8.4946	8.65659	8.43101	P	P	P	CUST_145569_PI430048170	0	Coding	TTTCCTCCAGGAATCGTGTTTCAATTGTAACCAAGAAATTTCCATTTGTGCTTCATGAAA	RefSeq	chr20	+	38304149	38337503
CUST_121988_PI430048170	0.00688453	0.347773	6.76411	6.23411	6.63408	P	P	P	8.07122	8.01107	8.16825	P	P	P	CUST_121988_PI430048170	0	Coding	TGGACACGGTGATGTGTCCCAACATGCCCAACAAAAGCGTCCTGCTCTACACGCTCTCCT	RefSeq	chr2	+	236569736	236582351
CUST_132670_PI430048170	0.00084926	0.499615	5.01431	5.25083	5.02258	P	P	P	6.20666	5.94152	6.14252	P	P	P	CUST_132670_PI430048170	0	Coding	CTCCCTGTAGGGCGCTTTTACTGTTATCTTAAACTGCGTGTTTATCTATATGTAAAAACT	RefSeq	chr2	+	44941897	44946077
CUST_141450_PI430048170	7.10207e-05	4.42686	10.7496	10.8848	10.7884	P	P	P	8.71909	8.73777	8.52054	P	P	P	CUST_141450_PI430048170	0	Coding	GGCTCCCGTTTAGCATTTTGTACTTAAGGAAATAAAAAACCAACAAAGGATCTCACATTT	RefSeq	chr2	-	216672104	216695549
CUST_136158_PI430048170	0.0003905	0.31565	9.19173	9.24451	9.06796	P	P	P	10.6602	10.9739	10.8494	P	P	P	CUST_136158_PI430048170	0	Coding	GGGCCTGGGAGGAAGATGTTTACATTTTTAAAGGTACACTGGTATTTATATTTCAAACAT	RefSeq	chr20	+	49982975	49988883
CUST_69699_PI430048170	0.000330884	0.448947	7.48759	7.37085	7.51938	P	P	P	8.58228	8.61624	8.64888	P	P	P	CUST_69699_PI430048170	0	Coding	ATTTCATACTTTGGTTGCATGAAGGCTGCCCCCATGAAAGAAGCAAACATCCGAGGACAA	RefSeq	chr11	-	27654894	27659649
CUST_142539_PI430048170	0.00167787	0.288286	5.48002	5.79055	5.6092	P	P	P	7.38988	7.43122	7.45809	P	P	P	CUST_142539_PI430048170	0	Coding	CTCACCAAGAGCACAACTTAAATAGGGCATTTTATAACCTGAACACAATTTATATTGGAC	RefSeq	chr1	-	89258950	89272861
CUST_142241_PI430048170	0.00502814	2.26622	5.93382	6.13972	6.40616	P	P	P	4.83376	5.28941	4.80141	P	P	P	CUST_142241_PI430048170	0	Coding	TTCTCAAAGATGCGTTTGCCTCCTGGAATCAGTATTTCCTTCCACTGTAGCTATTAGCGG	RefSeq	chr12	+	48978452	48982613
CUST_105705_PI430048170	0.00044324	0.46825	8.1419	7.95851	8.1228	P	P	P	9.05562	9.30931	9.13746	P	P	P	CUST_105705_PI430048170	0	Coding	ATTTCATCTTCTCAGATACAGCGGTGCTTCTGTTTGATTTCTGGAGTGTCCACAGTCCTG	RefSeq	chr9	+	113150957	113164142
CUST_138182_PI430048170	3.88256e-05	3.11397	9.29684	9.37678	9.44752	P	P	P	7.68606	7.75652	7.76494	P	P	P	CUST_138182_PI430048170	0	Coding	TAAACTGAGGATGGAAATGGGGACAAATGCTTGGTTTGCCCAAATATCTTAATAAAAGAC	RefSeq	chr9	+	32783498	32789201
CUST_95614_PI430048170	0.000526832	2.30487	8.01446	8.15256	8.05366	P	P	P	6.93355	6.72195	6.94396	P	P	P	CUST_95614_PI430048170	0	Coding	TTAATTCCCTTTCCTTAGAATGACCATGGTTGACACAGAGATGCCATTCTGGCCCACCAA	RefSeq	chr3	+	12288936	12434356
CUST_129036_PI430048170	0.000159846	7.10028	10.3822	10.2595	10.5925	P	P	P	7.50377	7.59552	7.66652	P	P	P	CUST_129036_PI430048170	0	Coding	TGAAACCTTGTGAGCAGAAGGCAAGAGCGGCAAGATGAGTTTTGAGCGTTGTATTCCAAA	RefSeq	chr19	-	51371619	51372706
CUST_136565_PI430048170	0.000110382	11.2204	5.65177	5.47043	5.39297	P	P	P	2.07597	2.00198	1.98376	A	A	A	CUST_136565_PI430048170	0	Coding	TATTATGCCTGAATGACTCCACTGTTTTTCTCTAATGCTTGATTTAGGTAGCCTTGTGTT	RefSeq	chr8	-	119557076	119638866
CUST_145608_PI430048170	0.00037819	4.80242	9.16987	9.35022	9.38611	P	P	P	7.05024	7.06901	7.00406	P	P	P	CUST_145608_PI430048170	0	Coding	GTCCTGTAATTGTTGCTAGACTTTATGTGTTGTACAACTAAACATTGCTGTTTGAACAGT	RefSeq	chr22	+	41976926	41998221
CUST_138292_PI430048170	0.0259028	0.491247	4.21461	3.62355	4.26553	P	A	P	4.99286	5.22822	5.03164	P	P	P	CUST_138292_PI430048170	0	Coding	GGTGGGAGGAAGCAAAAGACTCTGTACCTATTTTGTATGTGTATAATAATTTGAGATGTT	RefSeq	chr17	-	50184095	50201639
CUST_141767_PI430048170	0.000565815	3.07802	7.60431	7.74849	7.90781	P	P	P	6.21097	6.134	6.06178	P	P	P	CUST_141767_PI430048170	0	Coding	ATGGAAATTAAACAGGGACTTCAGAAAGCCGCACAGAAAGATCACCTTCCGATGGTGTGA	RefSeq	chr15	+	22786631	22829789
CUST_127912_PI430048170	0.000602747	2.86183	6.44666	6.68618	6.30093	P	P	P	5.12861	4.83373	4.93129	A	P	P	CUST_127912_PI430048170	0	Coding	CCTCCATCAGAATGGAACGAGTTTTGAGTAATCAGGAAGTATATCTATATGATCTTGATA	RefSeq	chr7	+	16753725	16784536
CUST_141481_PI430048170	0.0171552	0.250073	5.50661	5.70981	4.76212	P	P	P	7.29222	7.44964	7.39279	P	P	P	CUST_141481_PI430048170	0	Coding	CTGTCAACATCAAAGAGCACATTTACCAGTATAGCTTGCATAGTCAATATTTGGTATTTC	RefSeq	chr11	-	104994239	105023168
CUST_126729_PI430048170	0.000442456	0.338877	3.90257	3.74689	3.82197	A	A	A	5.23587	5.38214	5.5265	P	P	P	CUST_126729_PI430048170	0	Coding	CTAAAAGGACTGTTAATGCTTTTCTCAGACACATTGGCATTTTACAATTTTGCACATGGT	RefSeq	chr4	+	107931560	107953457
CUST_139533_PI430048170	0.00071774	2.07538	10.5677	10.7801	10.7566	P	P	P	9.57807	9.6966	9.67611	P	P	P	CUST_139533_PI430048170	0	Coding	CGTCACCAAAATTAACAAAACTGAGATATGTTCCCAGTTGTAGAATTACTGTTTACACAC	RefSeq	chr7	+	90154374	90164827
CUST_123106_PI430048170	0.00348403	4.27518	4.5755	4.51302	4.44395	P	P	P	2.66453	2.40111	2.1331	A	A	A	CUST_123106_PI430048170	0	Coding	CTTGGTTTGTAAATTGCCTGCATTTATTCTGTCAGCCAACATGTACAAAATGTAAGAAAG	RefSeq	chr4	-	95162504	95549210
CUST_52277_PI430048170	0.00782335	2.5856	7.05411	6.89277	7.19413	P	P	P	5.99682	5.61923	5.35681	P	P	P	CUST_52277_PI430048170	0	Coding	ACCGGATCCCCCAGATCCTCAACATGGCCTCAGAACTGGAGTTCAACTTAGAGACGATGC	RefSeq	chr1	+	43300894	43323110
CUST_142640_PI430048170	0.00328191	4.46002	8.20828	8.41172	7.95964	P	P	P	6.05033	6.07463	6.01825	P	P	P	CUST_142640_PI430048170	0	Coding	TCTGTCAGCAGGAGAGTTTTACCTATTGCATGGAAAGATGCTCATTATATATTGTGAAGT	RefSeq	chrX	-	103309345	103310955
CUST_137779_PI430048170	9.37665e-06	3.40682	10.5721	10.4293	10.5565	P	P	P	8.74028	8.68316	8.82958	P	P	P	CUST_137779_PI430048170	0	Coding	CCTGCATCAATAAAATGGGGCAGTGATGGCCTCCCACATTTGTCCCCTTCTTGGAAAAAA	RefSeq	chr19	-	7688756	7702146
CUST_140655_PI430048170	0.00636066	0.454367	8.80186	8.51835	8.78635	P	P	P	9.84269	9.85242	9.84286	P	P	P	CUST_140655_PI430048170	0	Coding	TACCTCATTCTGACACCTGCATATAGTGTGGGAAATTGCTCTGCATTTGACTTAATTAAA	RefSeq	chr22	-	31281592	31292534
CUST_107395_PI430048170	0.00040105	3.31543	7.17274	7.31353	6.92409	P	P	P	5.25096	5.54601	5.43712	P	P	P	CUST_107395_PI430048170	0	Coding	TAACACTTCTTTTTCCCATATGTCATTCATTTCTCAAGTCTAAGAGTAGCAGTTACCATC	RefSeq	chr19	-	51331540	51342124
CUST_143024_PI430048170	0.000320348	2.65396	9.71578	9.94382	9.92571	P	P	P	8.4077	8.54056	8.41978	P	P	P	CUST_143024_PI430048170	0	Coding	CTGGATTCTGTTCAACTGTAATCAATGAAAAAGATGTACGTTGTAGACAAAGTTGCAGAA	RefSeq	chr10	-	13643705	14330867
CUST_66130_PI430048170	0.0201756	2.37281	9.19032	9.66753	8.89624	P	M	P	8.48644	7.6939	7.80757	P	P	P	CUST_66130_PI430048170	0	Coding	ACTTCTCCCCGCAAACCTAGGTCAGACTTTTCCTTTCATCTTTGTGTTCATCTACTGTAA	RefSeq	chr2	+	87748090	87759475
CUST_128873_PI430048170	0.000384117	0.354182	9.14267	9.19805	9.15132	P	P	P	10.75	10.5752	10.6545	P	P	P	CUST_128873_PI430048170	0	Coding	GTTGAAAACTCAGACTGCTTTTGTGATGTTTCAAATGAATAAAACTATCCTCCCCTCGTT	RefSeq	chrX	-	120258649	120311536
CUST_108510_PI430048170	0.00452812	2.59593	6.70483	6.67752	6.17203	P	P	P	5.10759	5.36846	4.98201	P	P	P	CUST_108510_PI430048170	0	Coding	TGATGACCCATGGCGTCTAAGATCAACGTACCAATCTCAAAAATACCAGGCTGAATTCCC	RefSeq	chr19	+	54616929	54637530
CUST_141448_PI430048170	0.000980473	0.460512	15.7158	15.6098	15.688	P	P	P	16.7301	16.7065	16.925	P	P	P	CUST_141448_PI430048170	0	Coding	TCTCCTTGAAAACAGAGGGGTCTCAAGACATTCTGCCTACCTATTAGCTTTTCTTTATTT	RefSeq	chr7	-	45912244	45921272
CUST_133404_PI430048170	2.77013e-05	2.6789	11.6887	11.6597	11.5816	P	P	P	10.1408	10.2928	10.2296	P	P	P	CUST_133404_PI430048170	0	Coding	CCTGGGGCCTTGATGGTGAAAATGCACCCCAAATGAAAAATAATTATTAAAAATGATCTT	RefSeq	chr16	+	21678513	21760729
CUST_139607_PI430048170	0.0014484	2.01787	14.9335	14.9462	14.9375	P	P	P	13.8482	13.9838	13.9434	P	P	P	CUST_139607_PI430048170	0	Coding	ATTCCCACGCTACCCCCTGCCTTGGGAGGTGTGTGGAATAAATTATTTTTGTTAAGGCAA	RefSeq	chr1	+	180154832	180198034
CUST_131731_PI430048170	8.0653e-07	0.322192	6.34856	6.28433	6.3046	P	P	P	7.96484	7.9551	7.91993	P	P	P	CUST_131731_PI430048170	0	Coding	GTGGCCCGTTGAAATGTTGGTGGCACTTAATAAATATTAGTAAATCCTTCAAAGACAAAA	RefSeq	chr19	-	17351447	17377349
CUST_145320_PI430048170	0.00880771	0.384437	4.74875	5.00366	4.78879	P	P	P	6.33615	6.44238	5.8462	P	P	P	CUST_145320_PI430048170	0	Coding	TGTTCCAATCAATGCAGTTGACAATAAAGGAATGAGTATCGTCACGGAGTTGACTGCCTT	RefSeq	chr2	-	25926585	25982574
CUST_131307_PI430048170	0.00688739	18.4625	7.14234	7.07599	7.21749	P	P	P	3.40742	2.14427	2.99812	A	A	A	CUST_131307_PI430048170	0	Coding	GCTGCAAATATGCTTTCCAAGTGCTTTGCTTTCAAATTTTGTTTATGGTGCTTTTTGACA	RefSeq	chr14	+	70641786	70675360
CUST_136477_PI430048170	0.000779304	2.0163	8.75062	8.74494	8.50433	P	P	P	7.76903	7.66891	7.53036	P	P	P	CUST_136477_PI430048170	0	Coding	GGAGGAAAAAGCAAAGCAAAAGAAGCAGTGGATATTTTAAGACTAAAAAGGAAAACAAAA	RefSeq	chr16	+	29662949	29670502
CUST_134610_PI430048170	0.00863598	0.357678	4.3296	3.76657	4.10083	A	A	A	5.63517	5.49774	5.56536	P	P	P	CUST_134610_PI430048170	0	Coding	ACAGACATGGTTTGTCACTGTTGAGCTTCTGTTCCTAGAGAATCCTAGAGGCTTGATTGG	RefSeq	chr3	+	13480214	13506424
CUST_144639_PI430048170	8.8428e-07	26.2108	15.0046	14.9439	15.1671	P	P	P	10.2202	10.4306	10.3303	P	P	P	CUST_144639_PI430048170	0	Coding	CATAGCCACTAACCAACTAGTTACCTTTGGACTGCAACAAAAAATGTGAAAATGAAGATT	RefSeq	chr15	-	57953423	58065923
CUST_142540_PI430048170	0.00184748	0.492774	7.71632	7.60986	7.41416	P	P	P	8.56756	8.69878	8.54842	P	P	P	CUST_142540_PI430048170	0	Coding	CTGACTGTGTCTCATATTGGCTAGTGAGAGTGATCTGTTGGAATTGTATATCAAAATTTT	RefSeq	chr1	-	89181147	89198950
CUST_133450_PI430048170	0.000163874	0.383353	6.68951	6.55308	6.44123	P	P	P	7.91513	7.83932	8.07935	P	P	P	CUST_133450_PI430048170	0	Coding	ATGAGGGCCCCTCAGCCCCGCATTGATCTAAATAAAGGACTGCCGAGTTCCATGAAAAAA	RefSeq	chr10	-	5498694	5499570
CUST_81635_PI430048170	0.00221171	0.428206	5.4464	5.5956	5.54662	P	P	P	6.68641	6.94148	6.6148	P	P	P	CUST_81635_PI430048170	0	Coding	GGCTGCTTGATTTTGTAGAGAAATTAGAACCCATAACCATACACAGGCTATCAACATGTT	RefSeq	chrX	-	38149334	38220924
CUST_131153_PI430048170	3.32733e-06	40.2985	7.30518	7.49619	7.3125	P	P	P	1.97368	2.05632	2.09161	A	A	A	CUST_131153_PI430048170	0	Coding	AAACGTCTGTGCTCAAGGATTTATAGAAATGCTTCATTAAACTGAGTGAAACTGGTTAAG	RefSeq	chr1	+	159289713	159308224
CUST_2741_PI430048170	0.0197898	2.31715	4.78774	4.566	4.21157	P	P	P	3.71109	3.30501	2.83974	A	A	A	CUST_2741_PI430048170	0	Coding	TGCCTATTCAGAATAAATGGGTAACACTGATTACTTTTGGGAGGGGAACCAGTAGGTTGA	RefSeq	chr17	+	42851183	42858131
CUST_145729_PI430048170	0.000860646	5.47526	8.0162	8.18315	8.12732	P	P	P	5.88781	5.45743	5.59358	P	P	P	CUST_145729_PI430048170	0	Coding	CCTGGGTCTTGAGGAGTTCAATGTATGTCTATTTCTCTTGATTCACTTGTCAATAAAGTA	RefSeq	chr5	+	148202793	148215137
CUST_133358_PI430048170	0.045749	0.45724	3.58408	4.49695	3.58245	A	P	A	5.28653	5.05752	4.88155	P	P	P	CUST_133358_PI430048170	0	Coding	CTCAATTTTGGAATTTCAAACACCAGCAAAAAATTGGAAATCGAGATAGGTTGCTGACTT	RefSeq	chr1	-	153561108	153565830
CUST_133842_PI430048170	0.000946513	0.485242	9.31481	9.28362	9.14014	P	P	P	10.2783	10.3298	10.2652	P	P	P	CUST_133842_PI430048170	0	Coding	CTTGAAGGTCACATGTACCTATTGTGAAAATGTGAAGCTGTATTTCTGAAGCTGAAATAA	RefSeq	chr1	+	171841477	172412717
CUST_136525_PI430048170	0.00826487	2.2913	5.86455	5.95399	6.15065	P	P	P	5.09916	4.52286	4.71285	P	A	A	CUST_136525_PI430048170	0	Coding	CCCAGAGCAGCTCCACGTGAGAGCATTAAAGATGTAATGAAGATGTTTACATGGAAAAAA	RefSeq	chr3	-	50558024	50567792
CUST_142505_PI430048170	0.000808538	0.433409	5.3475	5.23195	5.03844	P	P	P	6.53652	6.47543	6.22244	P	P	P	CUST_142505_PI430048170	0	Coding	AGTTAGTTGATCCTGTCACAGATATAACCCTGATAACACCCCATAGATACGCGACACGTG	RefSeq	chr4	-	24806116	24980204
CUST_144503_PI430048170	0.00142999	2.88932	7.31264	7.69966	7.45766	P	P	P	5.88035	6.06801	5.94989	P	P	P	CUST_144503_PI430048170	0	Coding	TAGCTATATCCACTATGATTATAAACTGTGTCTCGACCTGTGTTATTTACATTAGCTGCT	RefSeq	chr1	-	56494746	56579584
CUST_128043_PI430048170	0.00591986	0.415253	5.72089	5.89586	5.37614	P	P	P	6.82631	7.06804	6.93965	P	P	P	CUST_128043_PI430048170	0	Coding	CAGAGTTCCAGTCATTATTGTTACATCATGTTTGCAGAAACCTTGTCTTATTTAGTGTCT	RefSeq	chr4	+	101790606	102074812
CUST_88442_PI430048170	0.00724187	0.384344	3.36203	3.97201	3.85732	A	A	A	4.98448	5.30491	5.09179	P	P	P	CUST_88442_PI430048170	0	Coding	AGGGGAGAGGTCCTTACCTCTGATCCACTTAGAGCAATAACCACTTTTTAAATGTAAAAT	RefSeq	chr1	-	32862267	32872492
CUST_129780_PI430048170	0.000156181	3.99789	5.30777	5.49723	5.40628	P	P	P	3.51945	3.45632	3.22802	A	A	A	CUST_129780_PI430048170	0	Coding	CTTAATGTCTTTGATTGCTGGACATGAAACAAACTGCCAATTAAATTTTGCGGAGACAAA	RefSeq	chr2	-	226731316	226798790
CUST_134116_PI430048170	0.000138549	0.456179	11.607	11.788	11.6816	P	P	P	12.878	12.8856	12.7089	P	P	P	CUST_134116_PI430048170	0	Coding	ACTCTGTCCCATTGTCTACTGGGAAGGTCCCAGGTCTTCACCAGTTTTACAATGAGTTAT	RefSeq	chr12	-	121020291	121039242
CUST_127783_PI430048170	0.000434508	0.455351	12.7566	12.7374	12.8306	P	P	P	13.9001	13.9166	13.9144	P	P	P	CUST_127783_PI430048170	0	Coding	CTAGGGCCGTGGCCTTTGCCGAGACTGTAGCAGAGAAAACGTATTTATTATTCCAAAAAA	RefSeq	chr1	-	998963	1000172
CUST_135445_PI430048170	2.11978e-05	2.16609	13.7274	13.6827	13.7807	P	P	P	12.6767	12.557	12.6111	P	P	P	CUST_135445_PI430048170	0	Coding	CCTCCCCTGGTCCTCCCAGTGTTTGCTGGATAATAAATGGAACTATGGCTCTACAAAAAA	RefSeq	chr9	-	34521041	34523039
CUST_131242_PI430048170	0.00394204	0.344534	4.01828	3.83239	3.445	P	A	A	5.19116	5.4814	5.27716	P	P	P	CUST_131242_PI430048170	0	Coding	TTGCCAAAAAGGAACTTTTCATGTCATGCAGTTGAGGGGACTTAGTCTCAATCCCAGGCT	RefSeq	chr11	+	289137	295688
CUST_136084_PI430048170	0.000880128	0.490241	9.7728	9.73032	9.98591	P	P	P	10.7357	10.8196	11.0176	P	P	P	CUST_136084_PI430048170	0	Coding	CGGCAGCTGTGTTTAGCCCCTCCAGATGGAAGTTTCACTTGAATGTAAAATAATAAAGTT	RefSeq	chr8	+	23528849	23572550
CUST_69740_PI430048170	0.000111852	3.65153	5.49742	5.32955	5.26858	P	P	P	3.62465	3.53281	3.32648	A	A	A	CUST_69740_PI430048170	0	Coding	AGCATAAATTTCCTGTGAATGTTCAATTACACATAATAAACATTATTGAATTGTACACAA	RefSeq	chr10	-	16823965	17129817
CUST_139845_PI430048170	0.0125675	2.02492	8.53017	8.60203	8.37409	P	P	P	7.31739	7.78687	7.30353	P	P	P	CUST_139845_PI430048170	0	Coding	ACCTTGTGTCTTGTAGGGTATGGTATGTGGGACTTCGCTGTTTTTATCTCCAATAAAAAA	RefSeq	chr12	-	117038922	117099446
CUST_90809_PI430048170	0.000723433	2.21639	8.3077	8.29117	8.28087	P	P	P	7.08419	7.21471	7.1333	P	P	P	CUST_90809_PI430048170	0	Coding	AATTGCGAATATTCTGGCCCACCAAAACCATTGCCAAAGGATGGATATGACTTAGTGCAG	RefSeq	chr18	-	23531498	23586617
CUST_141352_PI430048170	3.14965e-05	21.1692	11.7471	11.9248	11.4604	P	P	P	7.25171	7.0652	7.59124	P	P	P	CUST_141352_PI430048170	0	Coding	CCTGCATATCATTCACCCAAAACAAAGTAATAGCGCCTCTTTTATTATTTTGACTGAATG	RefSeq	chr12	+	85874294	85882992
CUST_141449_PI430048170	0.0011397	0.33303	10.4732	10.3811	10.3943	P	P	P	12.1566	11.9659	11.8719	P	P	P	CUST_141449_PI430048170	0	Coding	TGGAAGGAGACTTAGGAACCTACCAGTTGGCCATGATGTCTTTTCTTCTTTTTCTTTTTT	RefSeq	chr17	+	40443423	40457730
CUST_69663_PI430048170	2.10259e-05	0.45719	9.16789	9.15408	9.06541	P	P	P	10.301	10.2858	10.1874	P	P	P	CUST_69663_PI430048170	0	Coding	TTGCGAACGCTACGCCATGGTTTATGGATACAATGCTGCCTATAATCGCTACTTCAGGAA	RefSeq	chr12	-	14881180	14885919
CUST_130338_PI430048170	3.37603e-05	6.02422	17.0949	17.1363	16.9946	P	P	P	14.3598	14.4853	14.6019	P	P	P	CUST_130338_PI430048170	0	Coding	GTGCTTCTGAACCGCAAGGAGCAAACACTGAAATAAAATAGTTTATTTTTCACACTCAAA	RefSeq	chr20	-	38128460	38165298
CUST_131101_PI430048170	0.00444546	2.40138	4.27906	4.83625	4.56463	P	P	P	3.47817	3.40588	3.01649	A	A	A	CUST_131101_PI430048170	0	Coding	CTCAGCCACTCTGTCTGAGAGATGATTTTCTAATATTTATCCACTAATAAAGAAGAGTGT	RefSeq	chr20	+	63553019	63556682
CUST_133298_PI430048170	0.023786	0.166429	4.39283	4.58736	3.12903	P	A	A	6.69841	6.91957	6.61945	P	P	P	CUST_133298_PI430048170	0	Coding	CTGCTATTTATTCTTTATAATATCCCGTGTAGTAAATGAGAAAGAAGTGCAGAGCAGGAT	RefSeq	chr17	+	56593698	56595590
CUST_138150_PI430048170	0.00186013	0.449141	5.59628	5.93321	5.68195	P	P	P	6.78822	6.7581	7.12203	P	P	P	CUST_138150_PI430048170	0	Coding	GTGCTAGTAGAATATAAGATAAAAGAGGCTGAGAATTACCATACAAGGGTATTACAACTG	RefSeq	chr9	+	6215785	6257983
CUST_81221_PI430048170	4.38761e-05	0.436169	10.7203	10.7315	10.6116	P	P	P	11.8226	11.9726	11.858	P	P	P	CUST_81221_PI430048170	0	Coding	CCTCTGCATTTCTGGAATGTGTGTGCATCAATGATGTTTGTATATTTGAGGCATTTAAAA	RefSeq	chr9	-	114334153	114394405
CUST_129958_PI430048170	2.44557e-05	5.17527	13.4517	13.606	13.6872	P	P	P	11.0882	11.1847	11.3542	P	P	P	CUST_129958_PI430048170	0	Coding	GAGGGATTTCTCAGTGGGAAGCATTACACTTTGCTAAATCATGTATTTATTCCTGATTAA	RefSeq	chr8	-	133036727	133103066
CUST_129775_PI430048170	1.95467e-05	2.65375	16.7593	16.651	16.6722	P	P	P	15.3221	15.2514	15.2863	P	P	P	CUST_129775_PI430048170	0	Coding	CACTGTTTCTCTGCTGTTGCAAATACATGGATAACACATTTGATTCTGTGTGTTTTCATA	RefSeq	chr17_KI270909v1_alt	+	57923	59718
CUST_131884_PI430048170	0.0228396	0.466489	4.47735	3.87807	4.29202	P	A	A	5.2517	4.92633	5.72129	P	P	P	CUST_131884_PI430048170	0	Coding	CTCCTTACAAATATGATACTCTTTAGTGTTAAGCTAAGGCATTGATTCATGTATCTGTCC	RefSeq	chr15	-	65381486	65423072
CUST_88644_PI430048170	0.00152029	2.41559	8.11009	7.80693	8.19939	P	P	P	6.74871	6.97275	6.57937	P	P	P	CUST_88644_PI430048170	0	Coding	GCTGTTCTCTGTATCGTGATCTATCCTCAACAACAACAGAAAAAAGGAATAAAATATCCT	RefSeq	chr11	-	117836975	117877031
CUST_144602_PI430048170	0.00201778	2.07541	14.229	13.9566	14.1615	P	P	P	13.0301	13.0303	13.1377	P	P	P	CUST_144602_PI430048170	0	Coding	ACTGGAATCCTTTCAGCAAGACTTCTCTTTGCCTCAAATAAAAAGTGCTTTTGTGAGAAA	RefSeq	chr7	-	134442354	134459136
CUST_130455_PI430048170	0.0068379	0.407085	6.2038	5.659	6.13984	P	P	P	6.9318	7.5224	7.43018	P	P	P	CUST_130455_PI430048170	0	Coding	AGCTGAGACCGGTGGCTCTCTTCTTAAAAGCACCATATTAAAACTTGGAAAACTAAAAAA	RefSeq	chr1	+	196819730	196832189
CUST_109622_PI430048170	0.000377266	3.85027	7.7483	7.60675	7.71802	P	P	P	5.71646	5.60054	5.90815	P	P	P	CUST_109622_PI430048170	0	Coding	AGTCATCTGTATCTTCGTCTCTTTCCTCAGCTTTGACTACAAACTGGTGCAGAAGGTGTG	RefSeq	chr12	+	57216794	57226449
CUST_144414_PI430048170	7.24556e-05	28.9985	9.63804	9.82892	9.81175	P	P	P	5.14297	4.80113	4.73441	P	P	P	CUST_144414_PI430048170	0	Coding	CTGGGCCCACACTCACCTCTAGAATATTGTTTATTAGATAAAAGAAAAAGCTTTTCCTTA	RefSeq	chr2	-	26581204	26641343
CUST_129812_PI430048170	0.000683858	6.45119	10.7997	10.9372	11.1622	P	P	P	8.27238	8.34416	8.2351	P	P	P	CUST_129812_PI430048170	0	Coding	ATTTGTTTGATGGGTCCCAGGAAACACTAATAAAAACCACAGAGACCAGCCTGGAAAAAA	RefSeq	chr11	+	34632463	34663287
CUST_145440_PI430048170	0.0259244	4.27976	5.62139	5.51701	5.61835	P	P	P	2.68468	3.86042	3.66973	A	A	A	CUST_145440_PI430048170	0	Coding	TATCTTGTGAAATTTCTTTCAGGTCTCATAAAAGCGATGAAAGAGACCAGGATAACATTC	RefSeq	chr7	-	47774651	47948474
CUST_128745_PI430048170	0.000195622	2.01843	10.6788	10.6769	10.7445	P	P	P	9.66141	9.62939	9.76709	P	P	P	CUST_128745_PI430048170	0	Coding	GACCATGTCATGCAGAATTAACAAGGTAGCACCGAGCATATCAATAAATATTATTCTGAT	RefSeq	chr22	+	50170730	50180295
CUST_144706_PI430048170	0.00182119	0.466586	6.05916	5.9051	5.7372	P	P	P	7.04393	7.0611	6.90895	P	P	P	CUST_144706_PI430048170	0	Coding	GTATGCAGGCCAGGAAATGAATGTTATTGTAATAAAGTGTGATGGAAAATCCAGGTAATT	RefSeq	chrX	-	132076992	132128022
CUST_137622_PI430048170	0.015174	0.219291	4.34489	3.64277	3.37426	A	A	A	6.07387	5.96852	6.06459	P	P	P	CUST_137622_PI430048170	0	Coding	CTGGTTTCTCTTAGTTCTTCTCTAACATAGTACTTTCTTTCCAGCAAAAGCAAAATGTGT	RefSeq	chr2	-	174799313	175005253
CUST_141699_PI430048170	0.000615413	3.674	9.10034	9.02779	9.16403	P	P	P	7.28313	7.33043	7.03233	P	P	P	CUST_141699_PI430048170	0	Coding	GGAGGGTCTCTGGCTTTATTTTTCTGCTGTGCAGAATCCTATTTTATATTTTTTAAAGTC	RefSeq	chr16	-	11254416	11256182
CUST_138690_PI430048170	0.00018857	0.476319	8.65573	8.67521	8.70835	P	P	P	9.73533	9.69649	9.8154	P	P	P	CUST_138690_PI430048170	0	Coding	GAGTTACGGTCTTTCGGTTGTGTATTAGGCTACAGCTATTTATTAAATTTGTTCTTGTTC	RefSeq	chr13	-	113399609	113414393
CUST_133902_PI430048170	3.21534e-05	0.36947	6.24943	6.41383	6.38217	P	P	P	7.87722	7.75002	7.72831	P	P	P	CUST_133902_PI430048170	0	Coding	GATTGATTTGTCCTCAGTGCAAAAAGCATCTTTTGAAGAACTATTTCCAAATGTCAGCAA	RefSeq	chr5	-	131806990	131945698
CUST_135639_PI430048170	2.98644e-06	3.10455	16.1962	16.1067	16.1062	P	P	P	14.5364	14.5139	14.4564	P	P	P	CUST_135639_PI430048170	0	Coding	CTCTTTCTCTGCTGTTGCAAATACATGGATAACACCGTTAATTCCATGTGTTTTCATAAT	RefSeq	chr17_KI270909v1_alt	+	165044	167015
CUST_132107_PI430048170	3.4296e-05	7.79257	9.61746	9.70401	9.35326	P	P	P	6.66904	6.7181	6.40469	P	P	P	CUST_132107_PI430048170	0	Coding	CAAGCCTCTGTACATACAATTGGTTTAAATTATTTTTTCACTTGCCCTGGAAAGCAAACA	RefSeq	chr1	-	165400921	165445355
CUST_129141_PI430048170	4.35278e-05	0.364588	9.25398	9.08907	9.25022	P	P	P	10.7114	10.7011	10.5481	P	P	P	CUST_129141_PI430048170	0	Coding	GTGCACCAATGAGACCACGATGGGAAAGGGCCTATTTAACTCCTAATAAAAAACTGGCAT	RefSeq	chr1	-	153547332	153549258
CUST_138785_PI430048170	0.00896969	0.191502	2.15277	3.05965	2.27666	A	A	A	4.77611	4.98223	5.04675	P	P	P	CUST_138785_PI430048170	0	Coding	TTGCCAGGTAGGAAATATGTTCCATATCTTTACTTATCATTGCATTTCAGATGGGAACTA	RefSeq	chr7	-	83958342	84194901
CUST_65940_PI430048170	0.00270301	0.260717	5.91183	5.42371	5.35034	P	P	P	7.53967	7.64884	7.36876	P	P	P	CUST_65940_PI430048170	0	Coding	AAGGCATCATCCACTCAATTTTGAAGAAGTCCTGCATCGAAATTCTAGCAGCTGAACCAT	RefSeq	chr2	+	69013143	69249327
CUST_128832_PI430048170	0.000185198	3.40534	7.94372	7.90448	7.97661	P	P	P	6.06944	6.20883	6.23847	P	P	P	CUST_128832_PI430048170	0	Coding	CCAGCGCTTTTGTGTATATAAATGTTAATGATTTTTATAGGTATTTGTAACCCTGCCCAC	RefSeq	chr16	-	2852726	2858170
CUST_136120_PI430048170	0.00428906	0.361023	6.44707	6.24598	6.00748	P	P	P	7.72026	7.77593	7.64419	P	P	P	CUST_136120_PI430048170	0	Coding	CTCTGAGACAGTCTCTGTGTGGAATTTGCCTTAAACTGAAGTAAATTTGGTTCTTTTAGT	RefSeq	chr6	-	36740777	36839444
CUST_115535_PI430048170	0.00374417	2.15108	8.40204	8.46159	8.79626	P	P	P	7.31941	7.52847	7.51937	P	P	P	CUST_115535_PI430048170	0	Coding	GAAGGACTGGGTCAGAGATCTGTTGGAGAGAGAGAATAAAGAGATTATTTTTCATTATTT	RefSeq	chr2	+	100820150	100996825
CUST_121591_PI430048170	0.00531909	2.03355	7.48496	7.40255	7.78734	P	P	P	6.56575	6.43892	6.6212	P	P	P	CUST_121591_PI430048170	0	Coding	TTGCAAGGTGTCAGCCCAGAAACTGCTGAGCTTACTGGAAAAGGACGAGTTCAAGTCTGG	RefSeq	chr2	+	72887382	72892160
CUST_144658_PI430048170	4.18887e-05	2.49422	17.3374	17.4172	17.2588	P	P	P	15.9589	16.0731	16.0277	P	P	P	CUST_144658_PI430048170	0	Coding	CCTTTCCCTAAAGACCCTAAATCTGAGGAATCAACAGGGCAGCAGATCTGTATATTTTTT	RefSeq	chr15	-	89784894	89814840
CUST_136241_PI430048170	0.000239642	2.70888	9.65976	9.68576	9.86403	P	P	P	8.35976	8.304	8.23884	P	P	P	CUST_136241_PI430048170	0	Coding	GAGAAAGAACTCACTTACGAGAAGTTCGTAGAATGGACGAGGCTGGACATGATGGATGAA	RefSeq	chr6	-	2948158	2972165
CUST_130638_PI430048170	0.000206633	0.397267	9.76694	9.7629	9.86069	P	P	P	11.1313	11.2248	11.0251	P	P	P	CUST_130638_PI430048170	0	Coding	GCTTCTCTGCTCAGTGTCTACTAACGACCGACATTTGCTAATGTAAATAATAGTAAATTA	RefSeq	chr6	-	3722601	3752012
CUST_129147_PI430048170	0.00650699	0.299242	8.52486	8.18198	8.00386	P	P	P	9.94748	10.0126	10.0207	P	P	P	CUST_129147_PI430048170	0	Coding	GACTCAGACTGTTTCAGGCTCCAGGACAGGAAGTGCAGTGTAGGCAAAATTGCAAAAATT	RefSeq	chr1	+	78620381	78646145
CUST_102645_PI430048170	0.00228944	0.47581	6.91525	7.20593	6.88999	P	P	P	8.05289	8.18725	8.00103	P	P	P	CUST_102645_PI430048170	0	Coding	ATTTTTCAGCCTTGGGAAGTGGAATGAGGCATTTGTTGCTGCCAAGGAATGTCTCCAATG	RefSeq	chr3	-	36826816	36945057
CUST_135637_PI430048170	0.00132927	0.477189	6.27747	6.54372	6.27312	P	P	P	7.33109	7.46647	7.50985	P	P	P	CUST_135637_PI430048170	0	Coding	CCTGTGTAGTTTGGGTTCAGGGCTGACTTAAAATAAAGCACATCCTGCAAAGTCAAAAAA	RefSeq	chr18	-	10670246	11148762
CUST_141231_PI430048170	0.000618435	0.301672	9.45279	9.41602	9.32004	P	P	P	11.1073	10.9746	11.2806	P	P	P	CUST_141231_PI430048170	0	Coding	TAACTGGCACTTTATTTTACTTCTAACCTTGTTTCCTGACGGTGTACAGAATCAACAAAA	RefSeq	chr21	+	33070143	33072422
CUST_10100_PI430048170	0.0164861	0.283499	6.61396	6.70408	5.92532	P	P	P	8.25892	8.24304	8.3144	P	P	P	CUST_10100_PI430048170	0	Coding	TTTACACCCCAAAGAGTGTGCCCCATGGTGATGAAAATAAAGTGAACATGTTGCAAAATG	RefSeq	chrX	+	152759217	152760222
CUST_144660_PI430048170	0.00555748	0.418424	5.46056	5.24735	4.86291	P	P	P	6.72147	6.33465	6.30978	P	P	P	CUST_144660_PI430048170	0	Coding	GAGAGCCCTTCATGCATTTGCACTATTGGAAGGAGTTAGATGTTGGTACTAGATACTGAA	RefSeq	chr12	-	9752485	9760901
CUST_133568_PI430048170	1.15682e-05	6.13975	14.7022	14.8478	14.8522	P	P	P	12.0623	12.1925	12.289	P	P	P	CUST_133568_PI430048170	0	Coding	GTAAGTTGCTTCCTAACATCCTTGGACTGAGAAATTATACTTACTTCTGGCATAACTAAA	RefSeq	chr11	-	102862732	102875034
CUST_144059_PI430048170	0.00355865	2.38734	7.43269	7.20008	7.37466	P	P	P	5.81734	6.12321	6.2739	P	P	P	CUST_144059_PI430048170	0	Coding	GGAAAGGCTGTGTGGAAATTCATTGATGATACTTTAAAATGTCATCTTTGCTTGTACTAG	RefSeq	chr8	-	104379423	104467049
CUST_136124_PI430048170	0.00144924	2.53805	7.77331	7.71455	7.63628	P	P	P	6.17639	6.4671	6.4355	P	P	P	CUST_136124_PI430048170	0	Coding	CATCCTAACTTACTTCCCCAAGATATTGAGAGGTCATATCTGTTTTTCATCATTCATTTC	RefSeq	chr9	-	39072766	39288303
CUST_141235_PI430048170	0.0178327	2.10786	5.82684	5.24551	5.70562	P	P	P	4.28085	4.30916	4.92705	A	P	P	CUST_141235_PI430048170	0	Coding	TGAAAAGTCTGTTTGGGGGCATACTTTTCATATCTTATTGACTAAAGCCCTTGAGCCAGG	RefSeq	chr5	-	138869389	138875368
CUST_139472_PI430048170	0.0058649	2.01257	4.8114	4.91922	5.27637	P	P	P	4.0278	4.18309	3.78314	A	P	A	CUST_139472_PI430048170	0	Coding	CTCCCCTAACTCAATCCCTGGTACATTCCTAATAAAGCAGTTTTGAGGAAAATCAAAAAA	RefSeq	chr17	+	44847901	44850480
CUST_144360_PI430048170	0.000930361	9.27427	8.58188	8.47828	8.41901	P	P	P	5.07681	5.56071	5.15892	P	P	P	CUST_144360_PI430048170	0	Coding	GCTGTTTTTGCAGCCTGAGGAAGCATCAATAAATATTTGAGAAATGAATCCAGGAAAAAA	RefSeq	chr19	-	7728956	7732171
CUST_130188_PI430048170	0.000444612	0.476802	9.83127	9.63533	9.74839	P	P	P	10.813	10.8578	10.7546	P	P	P	CUST_130188_PI430048170	0	Coding	ACCAGTGGGCTCCTTTATGGTACTCTATGCAGTTAACATGTATCTAGCTGCATAGGGACA	RefSeq	chr10	-	103446785	103452405
CUST_106550_PI430048170	0.000483789	4.4646	7.46025	7.56196	7.33121	P	P	P	5.48549	5.30696	5.06384	P	P	P	CUST_106550_PI430048170	0	Coding	GGGCCATTTAACCTGGATGCCACCATTTTATGGGGATAATGATGCTTACCATGGTTAATG	RefSeq	chr10	-	88819901	88851975
CUST_135391_PI430048170	0.0342488	0.288344	4.0538	2.75235	3.17681	A	A	A	5.29636	5.30231	5.06912	P	P	P	CUST_135391_PI430048170	0	Coding	TCTTCTTACTTCTTCCCTTTGAGGACAAAGTTTCTCTCGAATAAAGAGACTGAAGCAAGA	RefSeq	chr12	-	108288043	108339317
CUST_137408_PI430048170	0.000904744	2.53723	8.10024	8.24076	8.18136	P	P	P	6.75767	6.72809	6.99516	P	P	P	CUST_137408_PI430048170	0	Coding	CCACTGCACCAGCAATGCTAGAAAACCAAGCCAATAAAAGTGATTTCTTTTTTCATTAAA	RefSeq	chr19	-	4502179	4517704
CUST_141792_PI430048170	0.000103611	0.449687	11.4804	11.4242	11.4298	P	P	P	12.6641	12.5427	12.5846	P	P	P	CUST_141792_PI430048170	0	Coding	TCGGGAGTTAGATGTATAGAGTGTTTGTATGTAAACATTTCTTGTAGGCATCACCATGAA	RefSeq	chr15	+	80779342	80951662
CUST_102251_PI430048170	5.29502e-05	0.428347	8.65981	8.62493	8.74698	P	P	P	9.96835	9.92125	9.80974	P	P	P	CUST_102251_PI430048170	0	Coding	AAACTCACCCTGGTGACCAGAGTACAGCAGTTGCAGGGTTTGCTTCAAAATCAATCCTTA	RefSeq	chr1	+	209756031	209782323
CUST_138100_PI430048170	0.00279927	2.30921	6.91273	7.02438	6.90744	P	P	P	5.53733	5.84156	5.8266	P	P	P	CUST_138100_PI430048170	0	Coding	TCCATAACTTGATGACTATAGATTGCACCTAGGCATTCCAATAAAAGCCAACCCAATGTG	RefSeq	chr4	+	182323983	182803024
CUST_139675_PI430048170	0.0149796	0.331044	3.68145	4.33267	3.33165	A	A	A	5.12641	5.44781	5.68528	P	P	P	CUST_139675_PI430048170	0	Coding	CTGTTCCGAAAATTTATATGGTGGAATGCGCCATGTATAAACTGTGAATTGTATTGACAA	RefSeq	chr1	+	215005541	215237093
CUST_141658_PI430048170	5.69536e-05	2.0328	11.7638	11.8963	11.8044	P	P	P	10.8056	10.745	10.8449	P	P	P	CUST_141658_PI430048170	0	Coding	CAGAAGTCTGAACAATTGGATAAATTTGACTTCCAAGACAGCTAAACTTTTCAACTGCAA	RefSeq	chr5	+	95731145	95796367
CUST_140026_PI430048170	0.0141313	6.7651	8.43148	8.46951	8.39952	P	P	P	5.89251	4.91703	5.99388	P	P	P	CUST_140026_PI430048170	0	Coding	TTGGGCCAACTATTTAGTAAGCCCGGATAGACTTATTGCCAAAAACAAAAAATAGCTTTC	RefSeq	chr2	+	46297401	46386703
CUST_133787_PI430048170	0.000172257	2.62491	11.8286	11.9251	11.9434	P	P	P	10.4811	10.4142	10.6199	P	P	P	CUST_133787_PI430048170	0	Coding	TGTAGAGCAGTGGTGTCTCCAATGAACTTGTTTCCTGGTTTTGCATCTTGTGAAATGTTT	RefSeq	chr9	-	81583682	81689535
CUST_135149_PI430048170	0.00997671	3.80535	5.21184	5.33069	4.93408	P	P	P	2.73371	3.69012	3.13578	A	A	A	CUST_135149_PI430048170	0	Coding	TTGCATGGTTTGGGTAAAAGCTAGCCTACATACAAAGGAATATGAAGACTGTGGAAGAAA	RefSeq	chrX	+	46573686	46598496
CUST_138639_PI430048170	0.00547959	0.467538	4.74246	4.59252	4.43896	P	A	A	5.8934	5.40737	5.73786	P	P	P	CUST_138639_PI430048170	0	Coding	TAAAATTGGGTTCTTACTGCATACGCTGCTTGCTGGTTTCTAAATAAAATTGGGTTCTTA	RefSeq	chr17_KI270907v1_alt	-	69149	71433
CUST_140046_PI430048170	0.000532804	2.68824	11.3235	11.582	11.6071	P	P	P	9.98433	10.1765	10.0821	P	P	P	CUST_140046_PI430048170	0	Coding	GCTCTAGTACCATGCTTAGTGCAAATGATTATTTCTATGTACAACTGATGCTTGTTCTTA	RefSeq	chr10	+	87659718	87747705
CUST_133601_PI430048170	0.00152313	2.17654	7.03306	7.2407	6.87353	P	P	P	5.89535	6.08107	5.81535	P	P	P	CUST_133601_PI430048170	0	Coding	ATTTTCCAGTCATTGGATCGTGTTTTCTTTTGTCCATTATTGTACTGTGCTGTACCACAT	RefSeq	chr13	-	39342891	39603219
CUST_133061_PI430048170	0.00310445	2.57081	8.76862	8.88149	8.67662	P	P	P	7.52541	7.54191	7.14645	P	P	P	CUST_133061_PI430048170	0	Coding	CAGCTGCTGTAACGGAGCCACCTCCAACTCTAACAATAAACCAAGTTCATTGCAGATAGT	RefSeq	chr15	+	43517607	43531620
CUST_141457_PI430048170	0.00027546	40.898	10.3748	10.4834	10.435	P	P	P	4.81576	5.20434	5.18133	P	P	P	CUST_141457_PI430048170	0	Coding	AAACCCATGTGGTGATGATGTGTATATATATGTGAGGATGTATCGGGAAGATTTCTAAAT	RefSeq	chr1	-	47216289	47232335
CUST_92165_PI430048170	0.0171836	4.3283	5.7148	5.78061	5.71319	P	P	P	3.53006	3.07435	4.08578	A	A	A	CUST_92165_PI430048170	0	Coding	GAGTGAGTTTGACATCTTCATCAACTACATAGAAGCCTACATGACAATGAAGATACGAAA	RefSeq	chr1	-	206767602	206772494
CUST_132551_PI430048170	7.48423e-05	0.463994	8.60535	8.49718	8.62427	P	P	P	9.65352	9.73291	9.66579	P	P	P	CUST_132551_PI430048170	0	Coding	GCCACAGTCCCCTAGAGAGATTAACATTGACAGTTCGACAAGAGAGACTATCATCAGGAA	RefSeq	chr1	+	192636137	192660310
CUST_106947_PI430048170	2.30199e-05	8.8828	16.2751	16.323	16.5068	P	P	P	13.2951	13.2071	13.1568	P	P	P	CUST_106947_PI430048170	0	Coding	CCTGGACTGAAGTTCGCATTGAACTCTACAACATTCTGTGGGATATATTGTTCAAAAAGA	RefSeq	chr8	-	81478496	81483238
CUST_137451_PI430048170	0.0023476	0.190488	3.95466	3.54692	3.66937	A	A	A	6.10632	6.14469	6.12718	P	P	P	CUST_137451_PI430048170	0	Coding	TTCCATAATTGCTTTTGCTCAGTAACTGTGTCATGAATTGCAAGAGTTTCCACAAACACT	RefSeq	chr22	+	38957521	38963183
CUST_100045_PI430048170	2.57305e-05	3.32342	12.0073	12.168	11.9954	P	P	P	10.2138	10.3979	10.3609	P	P	P	CUST_100045_PI430048170	0	Coding	AAATTGTAACCTGAAGCACATCGATGAAGTTATCTATCCGTGCCCTGTGGAGCCAAAAAA	RefSeq	chr12	+	29149002	29335616
CUST_137020_PI430048170	0.000370994	0.454338	10.2272	10.2022	10.3171	P	P	P	11.4061	11.3691	11.3881	P	P	P	CUST_137020_PI430048170	0	Coding	GACAGCCATCTCCAGAAACCTGACTTAAGAGAGTAAGATGCAAATCGTGCCTGTAAAAAA	RefSeq	chr21	-	44226826	44241004
CUST_134413_PI430048170	0.0168929	6.5921	6.98638	7.29648	7.18741	P	P	P	3.53852	4.55041	4.91363	A	P	A	CUST_134413_PI430048170	0	Coding	CTGCTGTAGAGCTGAAGCTGAACATGTGTTTGCTAAATAAAGATTCCCATTCCTAGCGCA	RefSeq	chr2	+	238100309	238133287
CUST_92158_PI430048170	0.0335124	0.485913	3.44081	3.76977	4.33285	A	A	A	4.95468	4.63095	5.17404	P	P	P	CUST_92158_PI430048170	0	Coding	TCTTTGGTCAACAGCCAGAACTTAAAATCTGCTGGAATAGGGTCAGAGACCATTTCAGCT	RefSeq	chr8	+	28701472	28753690
CUST_137336_PI430048170	7.78207e-05	26.141	6.69285	6.67405	6.87467	P	P	P	2.00971	2.05165	2.06356	A	A	A	CUST_137336_PI430048170	0	Coding	CTCAGTTAAATCTTTGAAGAATATTTGTAGTTATCTTAGAAGATAGCATGGGAGGTGAGG	RefSeq	chr8	-	41261956	41309471
CUST_136479_PI430048170	0.00302689	2.24381	7.76916	7.6913	7.75217	P	P	P	6.47995	6.48608	6.73497	P	P	P	CUST_136479_PI430048170	0	Coding	GATGCGAATTAGTAAAAGCTAAATTCAAAAGTAGAATGGGCATCTCCAAAGAGTACGATA	RefSeq	chr17	+	3636467	3663103
CUST_138398_PI430048170	7.88268e-06	4.87861	8.13935	8.17538	8.07191	P	P	P	5.92734	5.82531	5.77215	P	P	P	CUST_138398_PI430048170	0	Coding	AATCCAGTGTTTGTTGGGAAAGGAGGGATCAAAAACCTCTATAGTAGCCACTAGGGCAAA	RefSeq	chr1	-	175156986	175193093
CUST_140032_PI430048170	0.000565372	0.233556	4.54568	4.29569	4.80335	P	A	P	6.55101	6.55635	6.85498	P	P	P	CUST_140032_PI430048170	0	Coding	GGGCCAGAGAGCATGCACACGGTGTCCTGGTTAAATAAAGTCATCCCAACATTCAAAAAA	RefSeq	chr1	-	203216078	203229732
CUST_127176_PI430048170	0.000159366	0.479589	7.49944	7.50846	7.34046	P	P	P	8.48841	8.61186	8.42848	P	P	P	CUST_127176_PI430048170	0	Coding	ACACAGACAGGATAGTTTTTATGCTGAAGTTTTTGGCCAGCTTTAGTTTGAGGACTCCTT	RefSeq	chr5	-	39105251	39219578
CUST_100811_PI430048170	0.013152	3.86386	6.30777	6.3131	5.81569	P	P	P	4.42223	3.48347	4.52565	P	A	A	CUST_100811_PI430048170	0	Coding	CCTCTTTTCAAGTGACATCTCAAAATGTTGGACAACTTACTGTTTATCTACATGGAAATC	RefSeq	chr17	+	3636467	3663103
CUST_127464_PI430048170	0.00178561	0.351166	8.79486	8.69874	9.00386	P	P	P	10.3779	10.3718	10.2926	P	P	P	CUST_127464_PI430048170	0	Coding	TCAGCCACTGGTACTACGAGAATGTTTGTATTACCCACATTTGAAATGATTTGCTATGAT	RefSeq	chr5	+	54455600	54456384
CUST_141051_PI430048170	0.0179893	2.81153	9.26675	9.23416	8.64533	P	P	P	7.61236	7.58183	7.55798	P	P	P	CUST_141051_PI430048170	0	Coding	AATCTGTTTCCTACCTGTTCAGCCATGTTCCTTTATAACAGAATAACTTCTAGGTTATGC	RefSeq	chr7	-	18026775	18027863
CUST_127337_PI430048170	0.000296252	2.45346	9.71584	9.84449	9.94671	P	P	P	8.38007	8.59961	8.63891	P	P	P	CUST_127337_PI430048170	0	Coding	GTAGGTGATGGTATGATATCAAACTATTTTGCAGTTGTAAATAGGGGACAGATGGAAAAT	RefSeq	chr11	-	11270873	11622014
CUST_145113_PI430048170	0.0258782	0.482255	6.83096	7.42443	7.50483	P	P	P	8.21608	8.3009	8.47641	P	P	P	CUST_145113_PI430048170	0	Coding	CAAAATGTACTCCTTTCACAGTGTTCTCCTCTTCTGAACTGTGCAGTTATCTATTAAATT	RefSeq	chr4	-	104468305	104494901
CUST_140644_PI430048170	0.00382867	0.327904	3.69829	3.2823	3.72791	A	A	A	5.29272	5.14408	5.13364	P	P	P	CUST_140644_PI430048170	0	Coding	TTCTCTTAAATAATCAGGTGCTTTGTAACCAAGCACATCGGAACCAGAGGGTGGAGGTTG	RefSeq	chr17	-	78423696	78577394
CUST_130531_PI430048170	0.00842431	0.381862	4.83118	5.33602	5.05584	P	P	P	6.23095	6.23432	6.87077	P	P	P	CUST_130531_PI430048170	0	Coding	GCCAATTGAAATCAGACATATGCGATCTTGGGTTTTTGCATGGAAATTAATGTAATGCTT	RefSeq	chr3	-	192796815	192918161
CUST_131727_PI430048170	0.00188836	0.25379	9.59422	9.41032	9.71965	P	P	P	11.3642	11.3721	11.8774	P	P	P	CUST_131727_PI430048170	0	Coding	GGGTTGTGTATGCGAATGTTTCAGTGCCTCAGACAAATGTGTATTTAACTTATGTAAAAG	RefSeq	chr1	-	186671811	186680427
CUST_74698_PI430048170	0.000158695	0.325541	5.7407	5.92896	5.71385	P	P	P	7.40327	7.56244	7.26982	P	P	P	CUST_74698_PI430048170	0	Coding	ATCTGCATCAGGTACAGGTCCAAGAATGACAGCTGCCTACATCTGAAACATGGTGGAAAA	RefSeq	chr4	-	108047544	108168956
CUST_143861_PI430048170	3.22869e-05	0.438892	12.4932	12.5501	12.5555	P	P	P	13.7779	13.6656	13.7181	P	P	P	CUST_143861_PI430048170	0	Coding	TCAGGAAGAGCCTCCCTTTCTTTGCGTCTCCCTTTCTTTAATTAACATTTTCAAAAGTAA	RefSeq	chr1	-	230837118	230869589
CUST_137396_PI430048170	7.39733e-05	3.979	10.8628	11.0447	10.8187	P	P	P	8.7983	9.08129	8.86404	P	P	P	CUST_137396_PI430048170	0	Coding	AGGGCCTGGCCCAGTGGATTTCATGGTGATCATTAAAAAAGAAAAATCGCAACCAAAAAA	RefSeq	chr17_KI270857v1_alt	+	827290	836298
CUST_138497_PI430048170	0.00133579	6.77094	7.37332	7.46573	7.78164	P	P	P	4.33737	4.84934	5.0896	P	P	P	CUST_138497_PI430048170	0	Coding	AGAGAGTGAAGAATGCAGTTAAATACCTGCAAAGCCTTGAGAGGTCTTGAAGCCTCCTCA	RefSeq	chr16	+	57404766	57416062
CUST_137208_PI430048170	0.000509454	0.4713	9.7288	9.99856	9.85597	P	P	P	10.8526	11.0706	10.92	P	P	P	CUST_137208_PI430048170	0	Coding	GTAGTCCTGAGTAGGTGCATTTCTGTCTGTCTCAATAAATTTTACTTTGTCTGCAAAAAA	RefSeq	chr5	-	136975297	137499329
CUST_140475_PI430048170	2.65826e-05	0.479115	6.00444	5.95899	5.89205	P	P	P	6.99142	7.08259	6.9657	P	P	P	CUST_140475_PI430048170	0	Coding	GAGGAATTTCTCGTACCCCTACTGCATGGTATCGATTTTTAATAAATTGTTGCAAATTTG	RefSeq	chr9	-	98288081	98709197
CUST_126343_PI430048170	0.000217306	0.498896	13.1401	13.2012	13.2597	P	P	P	14.174	14.2191	14.2195	P	P	P	CUST_126343_PI430048170	0	Coding	CCCAGCGAACCCGCGTGCAACCTGTCCCGACTCTAGCCGCCTCTTCAGCTCGCCATGGAT	RefSeq	chr16	+	56608565	56609497
CUST_145114_PI430048170	0.0251823	2.25437	6.88937	7.09545	6.92622	P	P	P	5.3298	5.92553	6.04872	P	P	P	CUST_145114_PI430048170	0	Coding	GGCCTGTGATTATCTTGGGAAGCAGAGTGATTCATGCTAGAAAACATTTAATATTGATTT	RefSeq	chr8	+	18391244	18401213
CUST_145004_PI430048170	0.00322694	0.453572	3.70421	3.61652	3.91282	A	A	A	4.86014	4.94385	4.86608	P	P	P	CUST_145004_PI430048170	0	Coding	CATTGGCCCTGACAAAAAGGTGCTACGGTAGTGATGAAATTATAAGTAGATTTGTAGTTT	RefSeq	chr17	+	69414696	69542329
CUST_143378_PI430048170	0.000997685	0.450486	5.67454	5.82756	5.49225	P	P	P	6.64874	6.96234	6.83692	P	P	P	CUST_143378_PI430048170	0	Coding	CATAGTTAAAGATCTCCAACTTTGGAAAATATACATGATGTGAAACTGGGGTGCTATGTT	RefSeq	chrX	+	16946690	17153280
CUST_139657_PI430048170	0.000167296	4.81432	9.93725	9.83642	9.58445	P	P	P	7.40795	7.6395	7.52188	P	P	P	CUST_139657_PI430048170	0	Coding	CGTTTTGAGGAGAAATTTGATAATGACACTGTTTCCTGATAATAAAGGAACTGCATCAGA	RefSeq	chr12	+	57460150	57472264
CUST_101843_PI430048170	0.0247149	0.448948	6.653	6.47213	6.29057	P	P	P	8.05244	7.42948	7.30749	P	P	P	CUST_101843_PI430048170	0	Coding	ATATTGCCCTGGGAATGGAGTATCTGAGCAACAGGAATTTTCTTCATCGAGATTTAGCTG	RefSeq	chr2	+	111898613	112029368
CUST_107875_PI430048170	0.00511113	2.0622	9.76902	9.79473	10.1909	P	P	P	8.76419	8.82271	9.05806	P	P	P	CUST_107875_PI430048170	0	Coding	TCACTGTCTGGGGAATTCCTGGACACAAAGGACAGACAGGTGGAAGAGGACAGGCAGATG	RefSeq	chr19_KI270938v1_alt	-	191260	217825
CUST_133098_PI430048170	0.00197756	0.496313	6.45671	6.59046	6.69888	P	P	P	7.39042	7.65492	7.72204	P	P	P	CUST_133098_PI430048170	0	Coding	AAGTTGTCAACACTGCGTTCCAACACACGGAAAGAAAAAGCTCTCTGGGTGGACTTGAAA	RefSeq	chr1	+	117001749	117036551
CUST_136347_PI430048170	0.010463	9.17432	7.63067	7.65776	7.60538	P	P	P	4.98194	4.26	3.8153	P	A	A	CUST_136347_PI430048170	0	Coding	CCTCTCGATCTGTATATCCTCCAGTCCAAGATTAAAGAGGCGGACTGTGGCCTGAAAAAA	RefSeq	chr22	-	24219653	24245142
CUST_139306_PI430048170	0.0496934	2.07931	6.5946	6.48201	6.32263	P	P	P	4.88279	5.85327	5.34507	P	P	P	CUST_139306_PI430048170	0	Coding	CTGCAGTTCTGCGCTTTTTACCAGTGAAAAAATGTAATTATTTTCCCCTCTTAAGGATTA	RefSeq	chr4	-	83292460	83335153
CUST_98744_PI430048170	0.000564495	2.54472	11.9428	12.0624	12.2249	P	P	P	10.7397	10.8082	10.6492	P	P	P	CUST_98744_PI430048170	0	Coding	CATAGTGTTGTATGTTCCATTGCTAGCTGTCCTGCTGTTTAACACAGTGTTGTATTTTTT	RefSeq	chr4	-	56647987	56681706
CUST_129206_PI430048170	0.00304067	0.491601	8.73984	8.8217	8.47263	P	P	P	9.61727	9.69443	9.81175	P	P	P	CUST_129206_PI430048170	0	Coding	AACAAATGGTGTATTGCTTTTCATACAAGTGTTTTCACAAAAGCCATTTGCCTAGGCAGC	RefSeq	chr20	-	7977352	8019829
CUST_134091_PI430048170	0.00314071	0.40772	9.98309	9.82693	9.62149	P	P	P	11.0429	11.1658	11.1258	P	P	P	CUST_134091_PI430048170	0	Coding	GGAATGGTTTCTATGGCCAAAGTTTGGTTTTCTCAACACTGTCTAAATTTGGATTAAAAC	RefSeq	chr19	-	48837096	48868627
CUST_137078_PI430048170	2.03533e-05	2.91292	11.5368	11.517	11.6318	P	P	P	10.0374	9.93161	10.0875	P	P	P	CUST_137078_PI430048170	0	Coding	CCCCTCCACTGTCACATTGTAACTGAACTTCAGGATAATAAAGTGTTTGCCTCCAAAAAA	RefSeq	chr17	+	40015360	40017813
CUST_61274_PI430048170	0.0062645	0.326864	12.5828	12.5036	12.1401	P	P	P	14.0608	14.001	14.0413	P	P	P	CUST_61274_PI430048170	0	Coding	CCTGGGGTGAAATATACCAAATTCTGCATCTCCAGAGGAAAATAAGAAATAAAGATGAAT	RefSeq	chr14_KI270847v1_alt	+	1225376	1231261
CUST_131139_PI430048170	0.0153235	0.206744	3.05186	2.05503	2.10453	A	A	A	4.72147	4.88283	4.65118	P	P	P	CUST_131139_PI430048170	0	Coding	GGGATGTAAGTTTGTGTAAATTAATGGTTTATTCTTTGCAAATAAAACGCTTTCCCCGTC	RefSeq	chrX	+	69616066	70039471
CUST_102733_PI430048170	0.00158263	2.97928	5.57223	5.36102	5.54636	P	P	P	3.73802	3.83186	4.15926	A	A	A	CUST_102733_PI430048170	0	Coding	ATATCATGCCTCTTCTGGAAGAAACGGACTGCACAGAGGAAGGATTGAGCAATTTAGCCT	RefSeq	chr10	-	49154723	49188400
CUST_142243_PI430048170	0.000110685	0.42396	6.63736	6.45914	6.62199	P	P	P	7.87979	7.8578	7.69457	P	P	P	CUST_142243_PI430048170	0	Coding	ACCGAAATTTCCTACCAACCTGCTGTATCCAAAGTTTTGTAAAAAGTTGTAGAAGTTGTT	RefSeq	chr17_KI270908v1_alt	-	1281919	1338200
CUST_126923_PI430048170	0.000297451	2.23936	13.0962	13.0482	13.2531	P	P	P	11.9495	11.9191	12.0447	P	P	P	CUST_126923_PI430048170	0	Coding	TGTCTAGAAGGAATGTATTTGTTGCTAAATTTCGTAGCACTGTTTACAGTTTTCCTCCAT	RefSeq	chr22	+	32800815	32863041
CUST_119740_PI430048170	0.0118666	2.08464	6.72182	6.62949	6.53082	P	P	P	5.38826	5.41323	5.85767	P	P	P	CUST_119740_PI430048170	0	Coding	TATCAACACTGTTACTTTCGTACATTGGCTGGTAACAGTTCATGTTTGCTTCATAAATGA	RefSeq	chr12	-	88492792	88580473
CUST_27014_PI430048170	0.00170576	4.58664	8.30372	8.32472	8.29436	P	P	P	5.91461	6.19122	6.20654	P	P	P	CUST_27014_PI430048170	0	Coding	TCCCCAGGTGTTTCATTTGGTTTATCAGTGTTTAATTTGATGAATGCCATCATGGGAAGT	RefSeq	chr14	+	60981113	61083733
CUST_129103_PI430048170	0.00031339	2.02176	11.3209	11.3091	11.4158	P	P	P	10.3116	10.3349	10.3546	P	P	P	CUST_129103_PI430048170	0	Coding	TCTATTTTTCAATGGTCAGTGTCCAGGCTGGGACACAGAACTTATGAACTTTTGCTACAG	RefSeq	chr7	-	87402044	87475703
CUST_144274_PI430048170	0.00303133	3.57586	7.32844	7.20774	7.36749	P	P	P	5.36696	5.25206	5.73034	P	P	P	CUST_144274_PI430048170	0	Coding	GACTTGGTCTTCAACCACCATTACCCCTCTAACTTTGCACAAATAAACCTGTGTAGAAAC	RefSeq	chr9	+	34458751	34520989
CUST_128952_PI430048170	5.12405e-06	14.6269	5.99054	5.8889	5.81309	P	P	P	1.97401	2.03989	2.07079	A	A	A	CUST_128952_PI430048170	0	Coding	GAAATAGACCCCTCAAAATAGCGTCTTTCAGATCTTTTTGAATGAATCCACAAGATGAAA	RefSeq	chr19	+	38264457	38292614
CUST_131405_PI430048170	0.00140889	0.499639	10.8358	10.7376	10.7268	P	P	P	11.6585	11.7323	11.9038	P	P	P	CUST_131405_PI430048170	0	Coding	CGTGATGGTGTTGATTTCTTTCAATGATGCTTACCATCTATTTTAGCCACTGAGCCTTTT	RefSeq	chr12	-	89588048	89656067
CUST_136214_PI430048170	1.6564e-06	19.4438	10.4729	10.4663	10.6407	P	P	P	6.18393	6.23696	6.31897	P	P	P	CUST_136214_PI430048170	0	Coding	CAACTGCTTTGTGCTGATATCAGAACAGCAGAAATTAAATGTGAAATGTTTCTGATGACT	RefSeq	chr15	+	58138208	58185911
CUST_140620_PI430048170	0.00333839	0.431087	4.37632	4.42473	4.7962	P	A	P	5.83033	5.60516	5.82969	P	P	P	CUST_140620_PI430048170	0	Coding	AGTCCTACTTGAGGCTGCAATCACACTGAGGAACTCACAATTCCAAACATACAAGAGGCT	RefSeq	chr19_KI270932v1_alt	-	2176	18971
CUST_116823_PI430048170	0.000684174	0.481607	6.23489	6.08561	6.11944	P	P	P	7.19753	7.32524	7.07262	P	P	P	CUST_116823_PI430048170	0	Coding	ACAGACATTAGCATGTCAGACTTCGAGAACTCCAGGGAATTTGGAGCCAATGACAACATG	RefSeq	chr1	-	206928521	206946466
CUST_144498_PI430048170	0.00569793	6.02353	8.20265	7.96215	8.36515	P	P	P	5.19965	5.28613	6.11438	P	P	P	CUST_144498_PI430048170	0	Coding	GGCCTTTTTCACTTAGAAGCTGCACATTATGGAGCATTAAACACTTTTGTCATAGAAAAA	RefSeq	chr22	-	37490361	37519203
CUST_49997_PI430048170	4.81634e-05	2.03437	6.66286	6.55012	6.53744	P	P	P	5.59274	5.59481	5.48998	P	P	P	CUST_49997_PI430048170	0	Coding	AAGAAACACAAACCACAGATCCTCATGATGGGAAATGTGTCCTTCTCATGTCCACAGCCA	RefSeq	chr9	-	39072766	39288303
CUST_54402_PI430048170	3.12403e-05	5.45843	9.09084	9.09609	9.3418	P	P	P	6.84109	6.61437	6.73343	P	P	P	CUST_54402_PI430048170	0	Coding	GACTCCTGTGCAACTTTCCCAATGTGGCCTAAAAATGCAACTTCTTTTTATTTTCTTTTG	RefSeq	chr1	+	100719639	100739046
CUST_97141_PI430048170	0.00215515	0.453229	6.09112	6.06462	6.02465	P	P	P	7.08468	7.18562	7.32573	P	P	P	CUST_97141_PI430048170	0	Coding	TATTATCTGATCATTCCAAACCAACTGCTGAAACGGTAGCACCTGACAACACTGCAATCC	RefSeq	chr4	-	87473329	87529503
CUST_136243_PI430048170	7.18563e-07	47.945	13.3137	13.3256	13.5263	P	P	P	7.73169	7.72764	7.95454	P	P	P	CUST_136243_PI430048170	0	Coding	CCCACATATAAATGTACTTTTCCTTCCAGAAAAATTTCCCTTGAGGAAAAATGTCCAAGA	RefSeq	chr18	-	63637258	63644319
CUST_144813_PI430048170	2.85422e-05	0.313427	7.21928	7.04182	7.05515	P	P	P	8.85514	8.80072	8.68333	P	P	P	CUST_144813_PI430048170	0	Coding	TTTGGCAGTTGTCTGCATTAACCTGTTCATACACCCATTTTGTCCCTTTATTGAAAAAAT	RefSeq	chr2	-	60457193	60553498
CUST_132616_PI430048170	0.000972474	0.331296	3.88627	4.0801	4.27111	A	A	P	5.45255	5.91818	5.63529	P	P	P	CUST_132616_PI430048170	0	Coding	CTCACGTACTCAATTATTCAAACAGGACTTATTGGGATACAGCAGTGAATTAAGCTATTA	RefSeq	chr1	+	85580760	85583965
CUST_65984_PI430048170	0.00172228	2.47826	6.47625	6.73292	6.75138	P	P	P	5.27966	5.37827	5.38821	P	P	P	CUST_65984_PI430048170	0	Coding	AGCTGAAAAATTGTAGAGTGCCCATGGGGTAGAAGTAGAATCCTTTTATACTTTGGTTCC	RefSeq	chr2	-	72942035	73071836
CUST_145163_PI430048170	0.00145651	0.434868	9.70478	9.60209	9.72494	P	P	P	10.8846	10.7236	11.0159	P	P	P	CUST_145163_PI430048170	0	Coding	CAAGCTAGGGCAGAAGAGGGGTGTCAAGCTCCTCAATAAACTTGTCTCCACTTCAAAAAA	RefSeq	chr6_GL000255v2_alt	+	4471559	4473245
CUST_135467_PI430048170	0.0118589	0.204873	4.10751	2.91458	3.77018	P	A	A	6.08639	5.64767	6.11806	P	P	P	CUST_135467_PI430048170	0	Coding	TGACTTCTCTGATCTGTCTTGGTCGTTTGTGTTATAAAACCAAAGTTCTCTACAGACTTT	RefSeq	chr5	-	37812676	37835827
CUST_94583_PI430048170	8.86688e-06	0.492713	11.4543	11.3901	11.4302	P	P	P	12.4944	12.4246	12.4186	P	P	P	CUST_94583_PI430048170	0	Coding	CAGCAAATATGGTCTTGCTGCATTCAGGGCTTTTTTAAAGTCGGAATTCTGTGAAGAAAA	RefSeq	chr1	+	192809038	192812277
CUST_80292_PI430048170	6.50215e-05	4.6399	9.18435	9.31937	9.15967	P	P	P	6.87937	6.98716	7.14711	P	P	P	CUST_80292_PI430048170	0	Coding	ATTTCTCTTAGCACTGGTCGAGAGAGTTACATCCCTGGAATATGTGTGGCCAGAGTTTAC	RefSeq	chr8	-	133036727	133103066
CUST_140474_PI430048170	0.00654613	0.436272	8.26473	8.37852	7.84007	P	P	P	9.1891	9.49274	9.4281	P	P	P	CUST_140474_PI430048170	0	Coding	GGTCAGGAAGAGTGGGAGAAAGAAATTCCTCTTTACGTAGATACTTTTTAGCTTTATTTT	RefSeq	chr4	+	87650301	87664360
CUST_111368_PI430048170	0.000639737	0.493294	7.75794	7.8475	7.68424	P	P	P	8.63847	8.83544	8.86831	P	P	P	CUST_111368_PI430048170	0	Coding	GAGTTTTGGTTTACACATCAAGAAACAGACACACATACCTAGGAAAGATTTACACAATAG	RefSeq	chr5	-	39105251	39219578
CUST_80757_PI430048170	0.00398328	3.50637	6.54835	6.50525	6.62188	P	P	P	4.47208	4.78782	4.94817	P	P	P	CUST_80757_PI430048170	0	Coding	TTCAATTTCGAACGTGGAACAGAGCAGGACATTTGCTTTTCGGCGAACTTCAACGTGGTT	RefSeq	chr9	-	41891889	42129504
CUST_138122_PI430048170	0.00186047	0.401685	4.78171	5.20182	4.87632	P	A	A	6.43237	6.24197	6.15323	P	P	P	CUST_138122_PI430048170	0	Coding	GTCTCTTAGAATTTATTTCCCACTGACACAAACAAGCCATTTTGTCTGCTTGTATAACCC	RefSeq	chr11	-	105041325	105045324
CUST_134437_PI430048170	0.00359774	2.29284	6.46662	6.64616	6.88192	P	P	P	5.26901	5.36844	5.75019	P	P	P	CUST_134437_PI430048170	0	Coding	GTAATGGATTGCCGTTTGTACCTGTATCAGTATTGCTGTGTAAAAATTCTGTATCAGAAT	RefSeq	chr3	-	71771654	71785206
CUST_132360_PI430048170	0.0046567	2.86153	12.2555	12.1012	12.5965	P	P	P	10.7391	10.7852	10.9179	P	P	P	CUST_132360_PI430048170	0	Coding	TCCTCAACTGCCCCAAATCTCTTAATAGCTTCTAGTGCTGCTACAATCTAAGTCAGGTCA	RefSeq	chr1	-	167541013	167553819
CUST_141657_PI430048170	0.00199169	0.483699	10.7128	10.5362	10.5778	P	P	P	11.6546	11.6449	11.6766	P	P	P	CUST_141657_PI430048170	0	Coding	GCGGGAGACAAAAACCACACCTCTTTTTATATAAGGTTTCATATTTAATTTGGTCATGGA	RefSeq	chr8	+	22999578	23020197
CUST_139323_PI430048170	0.00233348	0.456365	6.60932	6.77917	6.8487	P	P	P	7.88169	7.91311	7.84726	P	P	P	CUST_139323_PI430048170	0	Coding	TGTGGGTGGGGGACTAACTGCGCAATGTAGTTAGGTGCTCAATAAACGGAGTTGCCGCTG	RefSeq	chr16	+	566994	569495
CUST_144309_PI430048170	0.0178316	2.02485	4.19986	4.80123	4.66897	P	P	P	3.38632	3.6616	3.62033	A	A	A	CUST_144309_PI430048170	0	Coding	TCATCCGATTCCCCTCTATCAGTCACTGCCAGTTAATAAACCTTTGCAAACGTTAAAAAA	RefSeq	chrX	-	48186219	48196763
CUST_144678_PI430048170	0.00195163	2.20357	10.2748	10.2199	10.5871	P	P	P	9.34146	9.07015	9.26511	P	P	P	CUST_144678_PI430048170	0	Coding	AATAAAACATACAGGAGTCTGTCTCTGCTATGGAATGCCCCATGGGGCATCTCTTGTGTA	RefSeq	chr6_KI270758v1_alt	-	9686	14891
CUST_132719_PI430048170	0.00692652	2.11552	8.84265	9.00613	8.49129	P	P	P	7.88689	7.80253	7.41126	P	P	P	CUST_132719_PI430048170	0	Coding	GGGTGTGATTTTTATACTGCTGCTGCTTGTCACAATTATTATAACTTCTCTGTAATTTCC	RefSeq	chr2	+	166888486	167259751
CUST_138033_PI430048170	0.00168995	0.476677	6.22745	5.9806	5.88879	P	P	P	6.97846	7.13307	7.20449	P	P	P	CUST_138033_PI430048170	0	Coding	CATATGTTTATCTCACACACATTATGAGCTTGAATTCTTAATTCATCCTAGCAAATTCTA	RefSeq	chr18	+	58671385	58750139
CUST_123162_PI430048170	0.0406635	0.4555	4.44121	4.74278	3.84331	P	P	A	5.3965	5.58456	5.58121	P	P	P	CUST_123162_PI430048170	0	Coding	TACATTTCACCAGAAATTGCCACTCGAAGTGCACATGGCCTTGAATCTGATGTTTGGTCC	RefSeq	chr4	+	127880860	127899222
CUST_116891_PI430048170	2.98161e-05	0.486307	10.8006	10.6873	10.7871	P	P	P	11.8457	11.8152	11.7346	P	P	P	CUST_116891_PI430048170	0	Coding	CCCAAAGGACTCAGAACTTTCTCTCCATACCTCCTTTTACTCTTTTCTTTCTGTGTAATG	RefSeq	chr1	+	182789448	182830384
CUST_129476_PI430048170	5.57584e-06	0.479198	9.36507	9.3404	9.30497	P	P	P	10.3897	10.3639	10.4404	P	P	P	CUST_129476_PI430048170	0	Coding	CAGGAGATTTTGGTTCACAGTAACCCAGCTCTCTTTCATCTAAGAACTTTAGATGAGAAA	RefSeq	chr4	-	83090057	83109859
CUST_144368_PI430048170	0.00675247	2.92999	6.00152	6.18192	6.2891	P	P	P	4.73851	4.20492	4.81749	P	A	P	CUST_144368_PI430048170	0	Coding	ATGTTTAACACCAGGGAGCTTGGAAAACAATAAACATCTGTGTGTGCAGCAGCCAAAAAA	RefSeq	chr14	+	21030185	21032173
CUST_134697_PI430048170	0.0122894	0.399458	5.26523	5.19711	4.61686	P	P	P	6.19772	6.46012	6.461	P	P	P	CUST_134697_PI430048170	0	Coding	CTCAAGACTTCCAGAGCCTCAAATGAGAAAATGTCTTTATTAAATGTAGAAAGTGATCCA	RefSeq	chr10	+	119207684	119455619
CUST_130658_PI430048170	0.00692773	0.0952925	5.22684	4.73591	4.15101	P	P	A	8.08104	8.15149	8.24753	P	P	P	CUST_130658_PI430048170	0	Coding	GGACTCACTTCTTGAAGATATGCTTGTTGCTTTACAACATATGTAAGCTATTCTTTAGCA	RefSeq	chr2	-	229023972	229271341
CUST_131929_PI430048170	0.000373064	4.52989	7.79215	7.84272	7.77924	P	P	P	5.58621	5.5318	5.74947	P	P	P	CUST_131929_PI430048170	0	Coding	GGTCACAACTATTCATGCTTCCTGTGATTTCATCCAACTACTTACCTTGCCTACGATATC	RefSeq	chr12	+	54854514	54858390
CUST_107697_PI430048170	0.00385993	2.07092	9.55117	9.64487	9.91803	P	P	P	8.59961	8.6155	8.76773	P	P	P	CUST_107697_PI430048170	0	Coding	AACTTCTCAGGTGCTGCCGTGAAGAACACACAGCCTGAGGACGGGGTGGAAATGGACACT	RefSeq	chr19_KI270938v1_alt	+	645384	652924
CUST_98223_PI430048170	0.000948169	0.469973	11.3943	11.4201	11.4373	P	P	P	12.5882	12.4987	12.4287	P	P	P	CUST_98223_PI430048170	0	Coding	AGGAAGCCCCTTCCCTGACTCCTGGCCCACAGGCCAGGCCTAAAAAAAACTCGTGGCTTC	RefSeq	chr14	+	104924815	104933236
CUST_140716_PI430048170	0.00329438	2.25588	13.409	13.475	13.475	P	P	P	12.105	12.3616	12.3577	P	P	P	CUST_140716_PI430048170	0	Coding	GGGACAAAGAAAGCATCTCGTAGGTGTGTCTACTGGGTTTTAACTTATTTTTCTTTAATA	RefSeq	chr18	-	23531498	23586617
CUST_141670_PI430048170	0.00269707	15.3646	9.89042	9.66371	10.0748	P	P	P	5.42171	5.71101	6.48391	P	P	P	CUST_141670_PI430048170	0	Coding	CCTTTAGCTTTCTAAGCTTTCTTACAATGTGGACTGATTACTGTAACATTTCACGTGTAA	RefSeq	chr11	-	35251204	35419558
CUST_133711_PI430048170	0.000125905	0.362526	6.32106	6.47287	6.526	P	P	P	7.87257	7.86161	7.98195	P	P	P	CUST_133711_PI430048170	0	Coding	AGGATAGAAAGCTGTTTCCCACCTGTTTGCTTTTACCATTAAAAGGGAAACGTGCCTCTG	RefSeq	chr12	-	122714755	122716892
CUST_141245_PI430048170	0.000110615	2.07884	9.58381	9.55009	9.68818	P	P	P	8.50612	8.49493	8.65193	P	P	P	CUST_141245_PI430048170	0	Coding	CAGGTTCACATAATAACCCCATTTGAATCCAAATTTGTGTATATTTTCTTATGCCAGCAG	RefSeq	chr12	+	100593617	100628288
CUST_135004_PI430048170	0.00207433	2.62127	13.7065	13.775	14.0787	P	P	P	12.3704	12.4858	12.5549	P	P	P	CUST_135004_PI430048170	0	Coding	ATTATTATCTCTTTCCAGCCTCATTCAGCTATTCTTACTGACATACCAGTCTTTAGCTGG	RefSeq	chr1	+	161706971	161714352
CUST_135179_PI430048170	6.49397e-05	3.33901	10.2409	10.3299	10.3362	P	P	P	8.46235	8.57441	8.64792	P	P	P	CUST_135179_PI430048170	0	Coding	CTTGTACAGAGGATTTTTCACTATGTGCCTAGCTTGGTGTCCATTCAGCTAAAATTGAAA	RefSeq	chr4	+	128809918	128875224
CUST_74336_PI430048170	0.00118407	0.416951	4.40995	4.74376	4.61947	P	P	A	5.74918	5.92196	5.90161	P	P	P	CUST_74336_PI430048170	0	Coding	ATTTTACCTACCAGGGCTCAGATACTGACATCTTTGCATTTGGAAACCCCCTGAACACAG	RefSeq	chr4	+	47485392	47593486
CUST_75467_PI430048170	0.000745119	2.14362	7.39265	7.39582	7.49399	P	P	P	6.41752	6.36211	6.19588	P	P	P	CUST_75467_PI430048170	0	Coding	CGATGGTTACATTGAATACTACATATGTCGAGGGAATGCAGAAAGAGTTAAGGAAGGCAG	RefSeq	chr5	-	55424841	55535078
CUST_143603_PI430048170	6.04622e-05	0.252767	6.28754	6.41891	6.15274	P	P	P	8.35597	8.16511	8.29619	P	P	P	CUST_143603_PI430048170	0	Coding	GAGTAATTCTAATCTCTTCTGTGTTTTCCTTGCCTTAACCACAAATTGTGGTGCTTTTTG	RefSeq	chr4	+	123396794	123403760
CUST_71180_PI430048170	0.00570481	2.22588	8.38993	8.37154	8.54551	P	P	P	7.43788	7.01256	7.36499	P	P	P	CUST_71180_PI430048170	0	Coding	ATGGTGTGATTGGCTCCATCCCTCCAGGCTCTCATTGTGGAAAGACCTGTCGGCACAGAC	RefSeq	chr20	-	38210504	38260772
CUST_105464_PI430048170	0.00020825	0.455308	6.41582	6.44637	6.57732	P	P	P	7.63879	7.56137	7.6482	P	P	P	CUST_105464_PI430048170	0	Coding	TATAAGCTGAGACCGGTGGCTCTCTTCTTAAAAGCACCATATTAAATCCTGGAAAACTAA	RefSeq	chr1	+	196651877	196747504
CUST_133644_PI430048170	0.0181135	0.48844	3.75617	4.1674	4.28973	A	A	P	5.12098	5.05274	5.18997	P	P	P	CUST_133644_PI430048170	0	Coding	GTCGGATGTTAAGATATTATATTTCAGTACTAGGAGCTTCTTTGCAGTCATTAACATGAC	RefSeq	chr11	+	100992079	100993935
CUST_76867_PI430048170	0.0015479	0.430179	4.4128	4.44154	4.12382	P	P	A	5.31475	5.70629	5.60111	P	P	P	CUST_76867_PI430048170	0	Coding	CAGGGCAGGTATAAACATCAAACATAGTGACATTGTCAAAACCTCTTCCATTTGAACATT	RefSeq	chr6	-	11713654	11779047
CUST_132613_PI430048170	0.00126653	0.293181	6.58906	6.58737	6.22018	P	P	P	7.99282	8.53371	8.15646	P	P	P	CUST_132613_PI430048170	0	Coding	GCTATGTGGTTCAGTTAATCAGTGTGCCAAGATTCTAATAAAGTTGACCTTGGGTTCTGT	RefSeq	chr14	-	94442463	94452785
CUST_136503_PI430048170	0.02441	2.91233	10.264	10.5194	9.615	P	P	P	8.73463	8.6755	8.49427	P	P	P	CUST_136503_PI430048170	0	Coding	GGCAACCACAGGTTTAAATGAAGACAAGCTGAAACAACACAAAACTGTTTTTATCTAAGA	RefSeq	chrX	-	52862528	52868088
CUST_139687_PI430048170	0.0299801	0.302681	3.64353	3.80164	2.5571	A	A	A	4.83218	5.386	5.18981	P	P	P	CUST_139687_PI430048170	0	Coding	CTACCACCTTTGCAATTGTCACTTATCTTTCACTCCCTGAATAAAGTATCTATGCATATA	RefSeq	chr1	-	153056119	153057512
CUST_140465_PI430048170	0.00282888	2.18369	15.7427	15.8642	15.5688	P	P	P	14.5448	14.6352	14.6288	P	P	P	CUST_140465_PI430048170	0	Coding	GGAGTTAATTAAGAGAATGACCAAGCTCAGTTCAATGAGCAAATCTCCATACTGTTTCTT	RefSeq	chr8	+	81280482	81284777
CUST_68791_PI430048170	0.00324392	2.3025	6.98525	6.60331	6.59256	P	P	P	5.25249	5.71857	5.59663	P	P	P	CUST_68791_PI430048170	0	Coding	GTTTTCTAAAACAATAGAGAAGGAAATTTCACCGGAAATTAGGAGTTTGAGCCCAGAATA	RefSeq	chr17	+	47323960	47441311
CUST_122357_PI430048170	0.000121141	2.25426	9.55588	9.54792	9.66184	P	P	P	8.40251	8.32994	8.5122	P	P	P	CUST_122357_PI430048170	0	Coding	ACACGAAGCCTACGGAGAGTGCTACAAGGTGAGCTGCCTGGAAATCCCTGGGCCCTCTGG	RefSeq	chr21	+	46098118	46129805
CUST_130272_PI430048170	0.000461598	0.395451	5.21485	5.46749	5.18958	P	P	P	6.44709	6.71486	6.72509	P	P	P	CUST_130272_PI430048170	0	Coding	GTATTTTCCCCAAATGGTGATGATGAGCAGTGCTTTGCATGAAACTAGATTTTATCAATT	RefSeq	chr4	+	72031803	72148201
CUST_133916_PI430048170	0.0113141	0.465428	5.20367	4.71443	4.87935	P	P	P	5.84288	5.83451	6.39855	P	P	P	CUST_133916_PI430048170	0	Coding	CCCGAGCAAAGTCTAAAGTTTACAGTAAATAAATTGTTTGACCATGCCTTCATTGCAAAA	RefSeq	chr5	+	148826592	148828634
CUST_127398_PI430048170	0.00485693	2.56304	4.80286	5.19611	4.82182	P	P	P	3.622	3.85649	3.23742	A	A	A	CUST_127398_PI430048170	0	Coding	GCCAATGATACATTGCACTAAACTGATGGAAGAAGTTATCCAAAGTACTGTATAACATCT	RefSeq	chr4	+	105895439	105971671
CUST_142058_PI430048170	0.00243964	0.39247	4.62926	4.66935	4.20593	P	P	A	5.70448	6.09389	5.76727	P	P	P	CUST_142058_PI430048170	0	Coding	GTTAATCTTGGTGCTCTATGGTGCATTAGCAGAGATATGAACAATTAAATGAAGACAAAG	RefSeq	chr2	+	216081865	216102783
CUST_140619_PI430048170	7.31111e-05	0.439971	7.76943	7.81818	7.72945	P	P	P	8.8773	9.01838	8.97272	P	P	P	CUST_140619_PI430048170	0	Coding	TCCTTAAGGGACAACATCCTTAAGTCAAAAGAGAGAAGAGGCACCACTAAAAGATCGCAG	RefSeq	chr3	-	172505507	172523507
CUST_80291_PI430048170	4.22801e-05	5.08972	10.5416	10.6018	10.6272	P	P	P	8.1448	8.25647	8.32231	P	P	P	CUST_80291_PI430048170	0	Coding	AGAAGCCACATGGAGACTCAAATTCGCATCTTCTCTATCCACATCATGACCAAAGGAACC	RefSeq	chr8	-	133036727	133103066
CUST_142832_PI430048170	0.0027617	2.01675	6.49982	6.63851	6.24775	P	P	P	5.44634	5.61715	5.29531	P	P	P	CUST_142832_PI430048170	0	Coding	TTTGCCGGCCTATGTGCTTTAACCTTAAGCTGATACTTTCCTTTAGGTGTCACTCTTGTT	RefSeq	chrX	-	103273689	103276869
CUST_133459_PI430048170	0.00473419	0.431315	11.4933	11.3869	11.1861	P	P	P	12.5678	12.5985	12.5558	P	P	P	CUST_133459_PI430048170	0	Coding	TTTCTAGCTGAGGGAAACTGTATTTTTCTTTCCCCAAAGAGGAATGTAATGTAAAGTGAA	RefSeq	chr2	+	6877664	6898232
CUST_145765_PI430048170	0.00405435	0.498445	7.09978	6.93792	6.98764	P	P	P	7.80304	8.07521	8.14336	P	P	P	CUST_145765_PI430048170	0	Coding	TAATATATTAATATATATCTGCTGTCCAGACAGCCTGTATCTTGGGGGACAGGGCTGGCC	RefSeq	chr8	-	143915146	143950876
CUST_132610_PI430048170	0.00748405	0.480228	4.70786	5.26489	4.98635	P	P	P	6.20883	6.14009	5.80732	P	P	P	CUST_132610_PI430048170	0	Coding	CCCCACCGTAGTATTTATAGTTAAATTAAGGGTGACAGTACAATAAAGTGATGGCGATGT	RefSeq	chr14	-	94768222	94770162
CUST_130505_PI430048170	0.000526957	0.283468	5.7204	5.5777	5.29314	P	P	P	7.18342	7.40767	7.4729	P	P	P	CUST_130505_PI430048170	0	Coding	GACGTGAAGCCATTTCCCATCATTCAACAGCCAGTTACAATTTTCTGTTTAATTAAATTC	RefSeq	chr18	-	58481249	58628957
CUST_126633_PI430048170	0.000169896	6.57323	8.00143	8.19534	8.10844	P	P	P	5.19651	5.3792	5.56297	P	P	P	CUST_126633_PI430048170	0	Coding	GTGCGACAGAATGCAGTTAGAATCAGTTCATATCACCATTAAAATCATCCATTCAGAAAC	RefSeq	chr9	+	76441665	76507416
CUST_138911_PI430048170	0.000100518	0.323667	9.03161	8.91863	8.97747	P	P	P	10.6212	10.4939	10.6902	P	P	P	CUST_138911_PI430048170	0	Coding	CCACTATAAGTCTAATGTTCTGACTCTCTCCTGGTGCTCAATAAATATCTAATCATAACA	RefSeq	chrX	-	66021737	66040125
CUST_140941_PI430048170	0.00619755	0.497517	11.5575	11.5654	11.9939	P	P	P	12.4837	12.8184	12.8528	P	P	P	CUST_140941_PI430048170	0	Coding	AAGAGGAGGAGCTGACACATTTCACTTGGCTGCGTCTTAATAAACATGAATGCAAGCATT	RefSeq	chr15_KI270905v1_alt	+	4856252	4911692
CUST_135328_PI430048170	0.00491757	7.40842	7.40959	7.39745	7.55843	P	P	P	4.70036	4.05905	4.83212	P	A	A	CUST_135328_PI430048170	0	Coding	CTTGGTTCACATTTTGGAAATCAGAGATTACAGATTACATGGCCATAGCTTATCTGTGTT	RefSeq	chr14	+	103928479	104052667
CUST_138915_PI430048170	0.00480578	0.47335	4.79379	5.10255	4.62499	P	P	P	5.67489	6.10796	5.98302	P	P	P	CUST_138915_PI430048170	0	Coding	CCGATCCCTGAGGGCGGTGAGGGGGAATATCAATAATTAAAGTCTGTGGGTACCAAAAAA	RefSeq	chr11	-	124747473	124752213
CUST_125580_PI430048170	0.00154851	2.17241	7.67164	7.68133	7.84601	P	P	P	6.64372	6.60525	6.59844	P	P	P	CUST_125580_PI430048170	0	Coding	CTTAAAATCTGAATGGATGGAACTTAAAACTACTTTGTTGAAACATCAACCTGGGCAGAA	RefSeq	chr8	+	135457464	135647609
CUST_130345_PI430048170	0.00215329	3.8169	5.19055	5.84273	5.62029	P	P	P	3.37103	4.00618	3.46935	A	A	A	CUST_130345_PI430048170	0	Coding	ACAGGATCTTTATTGGTGACCTTTTGTAAGACATTAGTTTGAGGTACTACCTATGTACTT	RefSeq	chr1	+	160115729	160143584
CUST_138783_PI430048170	0.00553133	2.01307	9.41191	9.27453	9.41646	P	P	P	8.21166	8.26704	8.57353	P	P	P	CUST_138783_PI430048170	0	Coding	GTTCCCTTTATTTCACATAAGCCCAAACTGATAGACAGTAACGGTGTTTAGTTTTATACT	RefSeq	chr7	-	80742537	80919351
CUST_144695_PI430048170	0.000173413	0.275894	4.27344	4.33456	4.2993	P	A	P	6.21653	6.19758	6.06245	P	P	P	CUST_144695_PI430048170	0	Coding	CAGCATGTATTATGCACTTCATTTCTCTACTGTGTGGAGAAAGCAATAAACATTATGAGA	RefSeq	chr6	+	125749585	125761269
CUST_128078_PI430048170	2.04111e-05	2.71577	12.9123	12.9697	12.9927	P	P	P	11.5328	11.4461	11.5701	P	P	P	CUST_128078_PI430048170	0	Coding	TCTGCTAATGAAAAGGGTTCTTTCTCTTGGGGGAAATGTGTGTGTCAGTTCTGTCAGCTG	RefSeq	chr12	+	10212889	10223125
CUST_134034_PI430048170	0.0454851	0.399004	3.72918	4.6163	4.76166	A	P	P	5.79685	5.84192	5.63641	P	P	P	CUST_134034_PI430048170	0	Coding	GAATCCGTATTGAATTTGTGTGGTATGTCACTCAGAAAGAATCGTAATGGGTATATTGAT	RefSeq	chr11	-	49146634	49208670
CUST_143780_PI430048170	0.000109824	0.319811	6.60337	6.55508	6.37435	P	P	P	8.20722	7.99917	8.2577	P	P	P	CUST_143780_PI430048170	0	Coding	CTAGGATTGATAGCAATTAGCTTTGATGAACCCATCCCAGGAAAAATAAAAACAGACAAA	RefSeq	chrX	-	153861513	153886174
CUST_90433_PI430048170	0.00198103	2.08883	11.8006	11.7608	12.0848	P	P	P	10.8853	10.6967	10.8899	P	P	P	CUST_90433_PI430048170	0	Coding	TTTCATGTCATCCTGTTGGCACTGATGAAGAACCCTTACAGTTCAGGGTTCCTGGAACTT	RefSeq	chr2	-	215360455	215436068
CUST_140358_PI430048170	0.00036075	0.445039	9.11873	9.17855	9.07667	P	P	P	10.2919	10.3056	10.2822	P	P	P	CUST_140358_PI430048170	0	Coding	ACCTGATTTTGTATCCCCCTGTAGCAGCATTACTGAAATACATAGGCTTATATACAATGC	RefSeq	chr12	-	14881180	14885919
CUST_135313_PI430048170	0.00114682	2.11171	6.00553	6.23816	6.25203	P	P	P	5.08687	4.91695	5.25046	P	A	P	CUST_135313_PI430048170	0	Coding	AATCTTGACTGAATGGAGAAAGTTTCTGTGCTACCCCTACAAACCCATGCCTCACTGACA	RefSeq	chr5	+	148312426	148315918
CUST_141017_PI430048170	0.000588975	3.83529	9.06007	8.98126	8.88585	P	P	P	6.83745	7.05682	7.19757	P	P	P	CUST_141017_PI430048170	0	Coding	TTACACATCAAGCGATGAAACTGGAAAACTACAAGCCACGAATGAATGAATTAGGAAAGA	RefSeq	chr19	+	54616929	54637530
CUST_145156_PI430048170	0.00425344	0.381947	5.22092	4.84358	4.96848	P	P	P	6.46244	6.37698	6.38359	P	P	P	CUST_145156_PI430048170	0	Coding	ATCTTCTGCAAAAGGTTAACCGCTGGAGTGATGCGAGATTAAACAGAGGTGATAAAAATA	RefSeq	chr7	+	2679521	2715436
CUST_81085_PI430048170	0.00372538	2.00692	7.71261	7.7571	7.40432	P	P	P	6.8213	6.40034	6.63176	P	P	P	CUST_81085_PI430048170	0	Coding	CAGAAATTCAGGAAGGGGAAAGTGTTCCGTGAGCCTCTGTTTCTTGATCTTCCCAAATCT	RefSeq	chr9	-	97029676	97039310
CUST_127390_PI430048170	0.00120461	2.03308	6.28577	6.34771	6.15587	P	P	P	5.06768	5.28536	5.35647	P	P	P	CUST_127390_PI430048170	0	Coding	GTTTAAAAAACAGGTGAGGCAAGTGAGTGATTTATTGTTCCTGAGGAAGTATATCTGATT	RefSeq	chr4	+	41359606	41700044
CUST_90363_PI430048170	0.0169743	0.486656	5.90773	5.62529	5.42578	P	P	P	6.71748	6.6923	6.70692	P	P	P	CUST_90363_PI430048170	0	Coding	GTTTGACTGTGTCAAAAGCTGTGAGCAGCAAAATATAATCCATATGACCTTTTCTCTTGC	RefSeq	chrX	+	16946690	17153280
CUST_140171_PI430048170	0.0034421	4.23952	14.2738	14.1797	14.2793	P	P	P	12.0619	11.9455	12.4305	P	P	P	CUST_140171_PI430048170	0	Coding	CTACATTTCTTGCAAAGTACATTCCTTTCTGTGGTATTTTGTCCTGTAACTGAAGTATAG	RefSeq	chr21	+	34073522	34106262
CUST_93896_PI430048170	1.98509e-05	2.5856	7.83052	7.73217	7.71632	P	P	P	6.41605	6.30593	6.44453	P	P	P	CUST_93896_PI430048170	0	Coding	TTCTCAAACGAGAGTCAGCCTTTAACGAATGACCATGGTTGACACAGAGATGCCATTCTG	RefSeq	chr3	+	12288936	12434356
CUST_141518_PI430048170	0.000105966	2.95309	9.92469	10.1359	9.96656	P	P	P	8.51872	8.45378	8.37306	P	P	P	CUST_141518_PI430048170	0	Coding	CAGTTGACTGTGTAGCTCTTGCCTGGCATTAAAGCATGTTTTTGGTTTAACATGAAAAAA	RefSeq	chr8	-	101686541	102124907
CUST_136799_PI430048170	0.000409455	0.441466	6.1871	6.4368	6.28073	P	P	P	7.4551	7.41855	7.5762	P	P	P	CUST_136799_PI430048170	0	Coding	CAACTGTAAACATCTGTCCATTGGTGTAGCTTTACAAACCATTCACTGATTTTGTGTAAT	RefSeq	chrX	-	132626009	132961395
CUST_131571_PI430048170	0.0004789	2.52308	12.0584	12.1717	12.1218	P	P	P	10.6805	10.9088	10.7497	P	P	P	CUST_131571_PI430048170	0	Coding	ATCTACGGCTGAAATATAATATGCGTGGACAAGCTTTTGCTGAAGTGTAGTGTGTCCTTT	RefSeq	chrX	-	78271471	78327691
CUST_128805_PI430048170	4.13164e-06	0.216867	6.79259	6.77441	6.66637	P	P	P	8.86778	8.95411	9.02571	P	P	P	CUST_128805_PI430048170	0	Coding	CACAAATGCCTTCTATGTTGTTTGCTCTGTAGACATGAAAATAAACAATATCTCTCGATG	RefSeq	chr4	+	87832968	87846816
CUST_128874_PI430048170	0.0049875	0.370487	4.8527	5.02113	5.25568	P	P	P	6.51026	6.43688	6.50726	P	P	P	CUST_128874_PI430048170	0	Coding	CCTCCTAGGCTTATCCCTAAAAATGCTCGCTCAGAGAATTAATTATAAACTTGTTTTGTT	RefSeq	chr4	-	53460269	53591586
CUST_128511_PI430048170	0.00053295	2.52684	8.21322	8.28157	8.27015	P	P	P	6.95976	6.98323	6.8044	P	P	P	CUST_128511_PI430048170	0	Coding	CTTTTGACAGCTTCATTTTATTTTTGACGTCACTTTTTGGCCATGTAAACTATTTGTGGC	RefSeq	chr8	-	20246164	20255292
CUST_123032_PI430048170	0.000898788	0.325862	3.28527	3.38859	3.26766	A	A	A	5.10158	4.87742	4.80138	P	P	P	CUST_123032_PI430048170	0	Coding	GGGCGCGCCCTGGACCGGCACGGGGTACCCAGCAAGGGGCGCATCCGCAGGCGTGCCTCC	RefSeq	chr4	+	47031277	47426430
CUST_141348_PI430048170	0.000335365	0.401288	6.14426	6.09644	5.8772	P	P	P	7.24503	7.37734	7.45354	P	P	P	CUST_141348_PI430048170	0	Coding	CCAGTACAAGCATATATATTGTGCCTCTTACAGCCTTTGGAATACATTGTTTCCATTTTT	RefSeq	chr6	+	17393504	17557792
CUST_69811_PI430048170	0.000545163	0.497694	5.69358	5.62932	5.73159	P	P	P	6.57612	6.74353	6.75004	P	P	P	CUST_69811_PI430048170	0	Coding	CAAAATGTAGCTTTTGGGGAGGGAGGGGAAATGTAATACTGGAATAATTTGTAAATGATT	RefSeq	chr1	+	85580760	85583965
CUST_133892_PI430048170	0.00143896	2.57997	7.64589	7.62423	7.60388	P	P	P	6.13903	6.27645	6.34894	P	P	P	CUST_133892_PI430048170	0	Coding	GCAGATGACGTGAAATTGTGATGTTTGTTACAGAGCTTTTATGTTTAAAGACTTCAATGG	RefSeq	chr7	-	4799108	4883704
CUST_142661_PI430048170	0.0040702	6.32899	5.3466	5.51279	5.26707	P	P	P	3.05525	2.26065	2.72751	A	A	A	CUST_142661_PI430048170	0	Coding	CCTTCTGTGTGTTCAATTTGAAAGCCTCATTGTTAATTAAAGTTGTGGATTATGCCTCTA	RefSeq	chr8	-	123680793	123737407
CUST_145348_PI430048170	1.81841e-05	22.9516	9.47874	9.81653	9.69868	P	P	P	5.05385	5.39378	4.96903	P	P	P	CUST_145348_PI430048170	0	Coding	CAGTCATGGCCAAATGTTCAATATGAGTCTCAATAAACTGAATTTTTCTTGCGAATGTTG	RefSeq	chrX	-	115003974	115017644
CUST_127160_PI430048170	0.00429551	0.239466	4.00298	3.92214	4.56215	A	A	A	6.33873	6.31407	6.09605	P	P	P	CUST_127160_PI430048170	0	Coding	CCCTCATACAGGGGAAAGCAACCTGGTCTAGCAAATTGAAAATAAAGATGATAAAACTCT	RefSeq	chr19	+	35449714	35451767
CUST_142496_PI430048170	0.000566949	0.32021	6.34709	6.68395	6.35589	P	P	P	8.03284	8.25322	8.04497	P	P	P	CUST_142496_PI430048170	0	Coding	TGGCGTAGTTTCAATATCTGTGTGTCTTTTCATGAGTGGCTGTTACTTGTGAAGAATTGA	RefSeq	chr9	-	36833274	37034479
CUST_129050_PI430048170	0.000809571	0.238375	4.67151	4.17879	4.39134	P	A	P	6.34464	6.50871	6.62342	P	P	P	CUST_129050_PI430048170	0	Coding	TGACTGTTTCCAGAGTGCTTATAATATACATAACTCCCTGGAAATAACTGAGCACTTTGA	RefSeq	chr2	-	156324431	156332775
CUST_145707_PI430048170	0.000154525	2.14064	5.84794	5.67902	5.79849	P	P	P	4.71291	4.6136	4.70786	P	P	P	CUST_145707_PI430048170	0	Coding	GTTGTGATGATGGAAGCAGTAAATCAAAATTATGGAAATTTGCACTGTTGAAAAGCATGC	RefSeq	chr10	-	21513479	21525682
CUST_58098_PI430048170	0.00239184	2.16973	9.63828	9.66643	9.63398	P	P	P	8.40648	8.56375	8.60842	P	P	P	CUST_58098_PI430048170	0	Coding	CAAGGGTACAGTTCGTACATTTCTTTCATGAAGAAGAACCAAAACATCGTCTAAACTTTA	RefSeq	chr11	+	102317449	102339403
CUST_104762_PI430048170	0.00102433	0.431757	10.1059	10.1222	10.1845	P	P	P	11.4699	11.2508	11.3196	P	P	P	CUST_104762_PI430048170	0	Coding	GGGTACATTACAGCTTGGGTTTTCCAACTGACTTAGGATTTCTGACTTTTTATTAATTTC	RefSeq	chr1	+	209756031	209782323
CUST_138471_PI430048170	0.00730915	6.03129	7.69933	7.829	7.82924	P	P	P	5.51007	4.67843	5.27391	P	P	P	CUST_138471_PI430048170	0	Coding	CCCCTTGTGTTCTATTGGTTCATTGTTAATAAATATCAAATGAGGTCACGCTCCTTAAAA	RefSeq	chr5	+	150189956	150211072
CUST_135254_PI430048170	0.000334364	0.402393	6.85306	7.13598	6.98883	P	P	P	8.19549	8.32771	8.40106	P	P	P	CUST_135254_PI430048170	0	Coding	ATCAGCTTGAGAAAGCAACACAATTTCAAATCCTATCTTCTAGATGCAAGCAGTGTTAAA	RefSeq	chr8	+	86098909	86154225
CUST_142381_PI430048170	1.20752e-05	0.20936	6.00353	5.80606	5.91217	P	P	P	8.04643	8.18561	8.25643	P	P	P	CUST_142381_PI430048170	0	Coding	TCAGTGTTGTACATAGCATAAAAACTCTGCAGAGAAGTATTCCCAATAAGGAAATAGCAT	RefSeq	chr15	+	39581078	39598921
CUST_129450_PI430048170	0.000172463	0.420592	6.83908	6.63178	6.65151	P	P	P	7.88052	8.0541	7.94005	P	P	P	CUST_129450_PI430048170	0	Coding	TGTTTGAAGCTTGAATGTCCTGCTCAAAATCTCAAAACACGAGCCTTGGAATTCAAAAAA	RefSeq	chr19	-	18058994	18087003
CUST_122789_PI430048170	0.0039775	2.79274	9.75367	9.79958	9.75419	P	P	P	8.16439	8.48348	8.19294	P	P	P	CUST_122789_PI430048170	0	Coding	GTGGCTCCTATTATGTACAATTTTAGTGCTAAGTACTGTGTTAATGATGGCTATCAAACA	RefSeq	chr3	+	131381764	131388830
CUST_139383_PI430048170	0.000968694	0.350993	8.62752	8.70911	8.75337	P	P	P	10.2148	10.3476	10.0462	P	P	P	CUST_139383_PI430048170	0	Coding	TATAAGAGGATGAAGTGATATGGTGAGCAGCGGACTTCAAAAACTGTCAAAGAATCAATC	RefSeq	chr12	-	8058322	8066359
CUST_140503_PI430048170	0.00039367	2.4764	8.98649	9.11416	9.26934	P	P	P	7.8056	7.66968	7.96838	P	P	P	CUST_140503_PI430048170	0	Coding	CCACATATTTCAGTGAGGGTAAGTATTTTCCTGTTGTCAAGAATAGCATTGTAAAAGCAT	RefSeq	chr13	-	20187464	20192975
CUST_132359_PI430048170	0.0130819	12.2378	6.5787	6.71225	6.78522	P	P	P	2.05666	3.4603	3.35396	A	A	A	CUST_132359_PI430048170	0	Coding	TTGATGGTCTCCATTCAGGCAAGTGTGTTTCAGCAAATCTCTAGAAATTTACATTGATTA	RefSeq	chr2	-	101348353	101387503
CUST_141891_PI430048170	1.37825e-05	0.443695	9.597	9.54611	9.66023	P	P	P	10.7966	10.7175	10.8069	P	P	P	CUST_141891_PI430048170	0	Coding	GCTTGGAGATAGAAAGGAATTCAACAATATATCAAATACTTTCCTTCCCACCTTTTTCCT	RefSeq	chr1	-	221701419	221742176
CUST_62853_PI430048170	5.52142e-05	4.25832	8.58228	8.73407	8.66054	P	P	P	6.69418	6.4559	6.54991	P	P	P	CUST_62853_PI430048170	0	Coding	ATTGTTTTACTTGTTAACTTGTTCTTGTGCCCCTGGGCACTTGGCCTTTGTCTGCTCTCA	RefSeq	chr17_KI270857v1_alt	+	827290	836298
CUST_62835_PI430048170	8.21511e-05	2.40566	16.8091	16.6886	16.6493	P	P	P	15.5094	15.4365	15.4047	P	P	P	CUST_62835_PI430048170	0	Coding	TGTCACTGTTTCTCTGCTGTTGCAAATACATGGATAACACATTTGATTCTGTGTGTTTTC	RefSeq	chr17_KI270909v1_alt	+	57923	59718
CUST_133503_PI430048170	0.00390542	2.13421	6.19049	6.11082	5.80476	P	P	P	4.85737	4.75294	5.20333	P	P	P	CUST_133503_PI430048170	0	Coding	GGCAGCTTTTGAAATTTCTGAGGCTATGATTACATACTCCTCATACTAAAGATTTCTTAG	RefSeq	chr12	+	104303731	104305204
CUST_66109_PI430048170	0.00134853	0.20552	11.3329	11.3034	11.3498	P	P	P	13.7422	13.4297	13.645	P	P	P	CUST_66109_PI430048170	0	Coding	ATACCTTCTACAGGTCCCCTCTGAGCCCTCTCACCTTGTCCTGTGGAAGAAGCACAGGCT	RefSeq	chr2	+	85694290	85698851
CUST_144137_PI430048170	0.00762518	2.86407	5.43923	5.55478	5.94204	P	P	P	3.65178	4.30362	4.37232	A	A	A	CUST_144137_PI430048170	0	Coding	TGAAGAAACGAGTGCTCTGAAGAGCCAGTTACCCTGTGTTGGCTGCAATAAAGGTCATTA	RefSeq	chr14	+	21042225	21044233
CUST_134373_PI430048170	0.000979054	0.18819	8.28695	8.18427	8.26506	P	P	P	10.4657	10.64	10.8378	P	P	P	CUST_134373_PI430048170	0	Coding	TGCTATGGCCTCATCATCAAGACTTTCAATCCTATCCCAAGTGAAATAAATGGAATGAAA	RefSeq	chr2	+	101991843	102028422
CUST_127033_PI430048170	4.80878e-05	2.67537	9.47249	9.49117	9.64678	P	P	P	8.05324	8.21529	8.08393	P	P	P	CUST_127033_PI430048170	0	Coding	GCAGTGGCTCCTATTATGTACAATTTTAGTGCTAAGTACTGTGTTAATGATGGCTATCAA	RefSeq	chr3	+	131381764	131388830
CUST_144404_PI430048170	0.00225801	2.21387	6.89422	7.07448	6.93246	P	P	P	5.84506	5.62007	5.97999	P	P	P	CUST_144404_PI430048170	0	Coding	GAGGGTGTGCTTTACTTTTTGATAAAGAGAAAGATGTTTACTCATAAACCCTTCAAAAGG	RefSeq	chr14	+	75578596	75648169
CUST_134797_PI430048170	0.00129413	0.475809	5.94623	5.913	5.71701	P	P	P	6.97738	6.94978	6.87212	P	P	P	CUST_134797_PI430048170	0	Coding	ATTCCTACAGCCATTTTTCACTCCCAACAGCTGTTTTTATTTTACCTCTTTGGCCTAAAG	RefSeq	chr5	+	77210880	77428255
CUST_137267_PI430048170	0.000688979	0.471555	7.07399	7.00391	6.98364	P	P	P	8.05754	8.22086	8.03077	P	P	P	CUST_137267_PI430048170	0	Coding	CAGCTTTATGAAGCCAACTCTGAACACGCTGGTTATCTAAATGAGAAGCAGAGAAATAAA	RefSeq	chr4	-	87473329	87529503
CUST_30901_PI430048170	0.023619	2.05617	6.95656	7.08772	7.0337	P	P	P	5.74038	5.83008	6.32073	P	P	P	CUST_30901_PI430048170	0	Coding	CCGCTGTCAAGCCGCATAACAGACCAATTTTTATTCCACGAGGAGGAGTACCTGGAAATT	RefSeq	chr17	+	68259181	68420859
CUST_144537_PI430048170	0.00458169	0.463287	9.08393	8.99996	9.00561	P	P	P	10.2808	10.1663	9.95524	P	P	P	CUST_144537_PI430048170	0	Coding	AAGCTGCTCCACCCCCAGATTGCAATGCTACCAATAAAGCCGCCTGGTGTTTACAACTAA	RefSeq	chr9	-	34689569	34691277
CUST_140062_PI430048170	0.000364061	2.67149	10.1736	10.2922	10.0916	P	P	P	8.72143	8.64268	8.93178	P	P	P	CUST_140062_PI430048170	0	Coding	GAACCAGTCTGTAAGATTTTTGTTAGCAGAAGAATTTTACCTATTGCATGGAAAGATGCT	RefSeq	chrX	-	103062652	103064240
CUST_137119_PI430048170	0.000123703	8.44396	5.63644	6.07836	6.09912	P	P	P	3.14656	2.73104	2.70425	A	A	A	CUST_137119_PI430048170	0	Coding	GTTGAGTGAAGCGTATTTGAAGTAACTGAGAATTACCATGTACATCATATTTGGGATAAC	RefSeq	chr4	-	47935976	47981533
CUST_133862_PI430048170	0.000689767	76.9093	8.80528	9.5728	9.35515	P	P	P	3.04851	2.89218	3.09364	A	A	A	CUST_133862_PI430048170	0	Coding	TCAGTAATAAAACATCTTTCCAGTCCTTGGTCAGTTTGGTTGTGTAAGAGAATGTTGAAT	RefSeq	chr8	-	66176376	66178611
CUST_128531_PI430048170	0.0124611	2.78623	5.93858	5.73336	5.65538	P	P	P	3.82674	4.47343	4.51047	A	A	A	CUST_128531_PI430048170	0	Coding	GCTCTACTACAGTAAATGACTGTAAAATTGTCAGTGGCTTACAACAACGTATCTTTTTCG	RefSeq	chr1	-	94529175	94541857
CUST_135193_PI430048170	0.00124697	4.54709	8.28112	8.0259	8.36994	P	P	P	6.08953	5.99615	6.0566	P	P	P	CUST_135193_PI430048170	0	Coding	ATGGCACTTTGGTGGGGTTGGAAACAAAGTCGACATTAAAGGTCATTTCTCCTGAAAAAA	RefSeq	chr5	+	159916732	159973010
CUST_142732_PI430048170	0.00488881	0.460654	6.9035	6.83281	6.89306	P	P	P	7.98352	8.15267	7.83095	P	P	P	CUST_142732_PI430048170	0	Coding	AAATTGAATTCTACTATTTATGTGATCCTTTTGGAGTCAGACAGATGTGGTTGCATCCTA	RefSeq	chr1	-	161189747	161199055
CUST_135232_PI430048170	0.000195058	0.324483	10.7816	10.899	10.9025	P	P	P	12.4713	12.4747	12.5114	P	P	P	CUST_135232_PI430048170	0	Coding	CTCTGCAGGAATGCAGGGAGGGCCGGGCTCCGCCCCAGGGTTATTTCTAAGTTGAAAAAA	RefSeq	chr7	+	74773961	74789376
CUST_135381_PI430048170	0.00103867	0.455363	10.4861	10.5576	10.2975	P	P	P	11.5079	11.6131	11.6342	P	P	P	CUST_135381_PI430048170	0	Coding	ATTTGCTGTCTTTTTGTATCTAAAGTCTTCCTATTGTACTGCACAAACCATGGATTGTAC	RefSeq	chr17	+	70169534	70180042
CUST_85637_PI430048170	0.00124735	0.392045	6.54319	6.26498	6.51278	P	P	P	7.84678	7.81913	7.72055	P	P	P	CUST_85637_PI430048170	0	Coding	AAGTTGAGCCACCTTTGGAAGACGCACGGGTGGAGTTTGCCAGAAGAAAGGCTGTGCCAG	RefSeq	chr21	-	44226826	44241004
CUST_139667_PI430048170	0.000159071	3.27918	10.085	10.1232	10.1695	P	P	P	8.4095	8.41961	8.40988	P	P	P	CUST_139667_PI430048170	0	Coding	GGGAGGTGCTGCCCTTAACCATGACACCATTGTAAGAGCTGTCCACATTTGTATGTTGTG	RefSeq	chr19	+	38319843	38329009
CUST_101840_PI430048170	0.000429109	2.16561	11.4655	11.4405	11.6624	P	P	P	10.5232	10.2651	10.4344	P	P	P	CUST_101840_PI430048170	0	Coding	TTAATTTATTTTCCAGGCACCACTGTAGTTTAGTGATCCCCAGTGTCCCCCTTCCCTATG	RefSeq	chr2	+	72917474	72934891
CUST_137605_PI430048170	0.0018527	8.32205	6.56099	6.07624	6.87261	P	P	P	2.89569	3.38135	3.97009	A	A	A	CUST_137605_PI430048170	0	Coding	AACCACTTCATTCTTGAAAGCTGTGGCCAGCTTGTTATTTATAACAACCTAAATTTGGTT	RefSeq	chr1	-	206767602	206772494
CUST_130562_PI430048170	0.000322104	4.38082	7.04821	6.98155	7.12148	P	P	P	4.77514	5.0788	4.89069	P	P	P	CUST_130562_PI430048170	0	Coding	GTGTACAATGTAAGGGTTTTAGGGAGCAACAGTATTTAACTGGAAGAAAGAATTGCATAT	RefSeq	chr14	-	88614829	88792752
CUST_103539_PI430048170	1.28945e-06	0.354323	6.66666	6.66262	6.73436	P	P	P	8.20101	8.14172	8.21165	P	P	P	CUST_103539_PI430048170	0	Coding	AGAAAAGCCTGCAAGAAAATAGGTCTAGTGAAGACACCCAGGATGAGAAGATTGCATCGT	RefSeq	chr5	-	131806990	131945698
CUST_135074_PI430048170	0.000583363	0.325492	7.14145	7.33759	6.92028	P	P	P	8.57825	8.76947	8.91946	P	P	P	CUST_135074_PI430048170	0	Coding	CTTATCACTGTATACCACTGGAGTTTTCTGGTTATCTCTCGTATAGCAAAATCTAACTGA	RefSeq	chr7	-	141927356	141946983
CUST_65198_PI430048170	0.00433972	2.43641	5.61964	5.66438	6.05882	P	P	P	4.47121	4.63742	4.41202	P	P	A	CUST_65198_PI430048170	0	Coding	ATATAGGGAAAACAAATCAGCATCCTGGGTTAGACGGATACAAGAGCCTGGGAAGAATGG	RefSeq	chr19_KI270938v1_alt	+	555577	570141
CUST_52542_PI430048170	0.00110575	2.39003	11.7364	11.5932	11.8795	P	P	P	10.463	10.4282	10.5579	P	P	P	CUST_52542_PI430048170	0	Coding	TCACCATGCAAATAACATGCCCAGCAAAAACTTGCTTTATGGGTCTGCCTGGAGAAAAAA	RefSeq	chr20	-	51003655	51023138
CUST_135561_PI430048170	4.95382e-05	9.15815	9.21411	9.44231	9.28495	P	P	P	6.27573	6.14925	5.91828	P	P	P	CUST_135561_PI430048170	0	Coding	CCAAATTGCAGATTATTCTGCAGAGAGGGAATTGCATGTTTGTGTTGTATATTTAGTATG	RefSeq	chr6	-	75084325	75205907
CUST_76133_PI430048170	0.0009733	2.23558	7.47235	7.24124	7.35613	P	P	P	6.38359	6.09315	6.1009	P	P	P	CUST_76133_PI430048170	0	Coding	TTTCCTAGACCCCAAAGAGGTGAATTGCATTTAAATACAGTCTGCCTCCACTGAGGGCAT	RefSeq	chr5	+	145936562	146063316
CUST_92472_PI430048170	0.000142653	0.467725	9.19891	9.34801	9.21566	P	P	P	10.3848	10.425	10.2397	P	P	P	CUST_92472_PI430048170	0	Coding	TGCACAGGCTTCAGCAAAAATGTTGCAGGAAATGCAAAGAAAGAATGAGCAGATGATGGA	RefSeq	chr1	-	89052303	89065360
CUST_141273_PI430048170	0.000216802	0.313602	11.8395	11.6181	11.6326	P	P	P	13.3339	13.3339	13.4491	P	P	P	CUST_141273_PI430048170	0	Coding	CAACATTTTACCCACACACAGATAAAGTTTTCCCTTGAGGAAACAACAGCTTTAAAAGAA	RefSeq	chr17	-	40553769	40561013
CUST_142909_PI430048170	0.0124814	0.476131	4.58656	4.23918	3.96282	P	A	A	5.16457	5.39931	5.48555	P	P	P	CUST_142909_PI430048170	0	Coding	CCTCAACCACCTATTCATTGACTTCTTTTGTGTTAGAGTGAATAAAATTTTGTTCATGCC	RefSeq	chr3	-	112815708	112845950
CUST_145573_PI430048170	0.00190287	0.084063	4.59945	4.67239	5.18123	P	A	P	8.43204	8.34483	8.46285	P	P	P	CUST_145573_PI430048170	0	Coding	ATAAAGTGTCAAGCAAGATTTTAGCCGCAGCTGCTTCTTCTTTGGTGGATTTGAGGGGTG	RefSeq	chr2	+	85694290	85698851
CUST_138488_PI430048170	0.00933045	5.29717	5.28198	5.1425	4.94863	P	P	P	2.68894	3.17366	2.12799	A	A	A	CUST_138488_PI430048170	0	Coding	GTTGCTAAATATGTTATTGTGGAAAGATGAATGCAATAGTAGGACTGCTGACATTTTGCA	RefSeq	chr17	+	34356451	34358610
CUST_137318_PI430048170	0.0142192	2.95225	6.02259	6.12358	6.20427	P	P	P	4.6312	4.83828	4.10643	P	P	A	CUST_137318_PI430048170	0	Coding	AAAGCGATTTGAGATGCCAATACCTGTGAATACCTGTTAATAAAGAGCTGTTAAATAGAC	RefSeq	chr2	+	132416573	132646596
CUST_136763_PI430048170	0.000161445	3.14771	11.3486	11.3079	11.5592	P	P	P	9.65152	9.79452	9.81418	P	P	P	CUST_136763_PI430048170	0	Coding	CTGTATGCCTTGCTTCTACCATGAGCAGAGACAATTAAAATCTTTATTCCAGTGAAAAAA	RefSeq	chr1	+	153678687	153693992
CUST_99568_PI430048170	0.0236226	0.442011	4.09337	4.7408	4.72524	P	P	P	5.68493	5.65264	5.83799	P	P	P	CUST_99568_PI430048170	0	Coding	AGTGAAATGACCCGCGAAGAGATCAATGCGCTAGTGCAGGAGCTCGGCTTCTACCGCAAG	RefSeq	chr22	-	31104776	31107565
CUST_145746_PI430048170	0.00013291	3.06622	9.26769	9.53786	9.44093	P	P	P	7.68212	7.84403	7.8764	P	P	P	CUST_145746_PI430048170	0	Coding	TTCCCTTTTCTCTGTATTGGTCAGTGTAGTTGATGTAAAACCGTTTTGTGGATGGAAAAT	RefSeq	chr18	-	45983535	46072284
CUST_111715_PI430048170	0.000470241	0.492746	9.55681	9.62264	9.67721	P	P	P	10.6916	10.7048	10.5187	P	P	P	CUST_111715_PI430048170	0	Coding	ATCCACAGCATCCGGGACCTCCAGCGACTCCTGGAGATAGACTCCGTAGGGAGTGAGGAT	RefSeq	chr7	-	497259	519844
CUST_52649_PI430048170	0.0274595	2.11951	6.19081	6.17068	6.14426	P	P	P	4.76131	5.41114	5.00685	P	P	P	CUST_52649_PI430048170	0	Coding	AGTAATCTTGACTGAATGGAGAAAGTTTCTGTGCTACCCCTACAAACCCATGCCTCACTG	RefSeq	chr5	+	148312426	148315918
CUST_141712_PI430048170	0.000456008	2.10336	10.3964	10.4113	10.5722	P	P	P	9.23849	9.45799	9.46086	P	P	P	CUST_141712_PI430048170	0	Coding	CAGGAACTTGTATAGTTCAGCTTCCAACACTTTGGAACAGATTAAAAAGGGAATCTTTTA	RefSeq	chr16	-	20858073	20900239
CUST_138992_PI430048170	0.000510728	2.79499	7.48173	7.3981	7.47422	P	P	P	5.89218	5.90907	6.09669	P	P	P	CUST_138992_PI430048170	0	Coding	TGCTTAGTCCTTTAGTTGGGAAACAGAATCAGGGCATAGAGCAGAAGAGAGCTTGACACT	RefSeq	chr9	-	15170843	15307360
CUST_137931_PI430048170	0.00636891	2.1453	9.11262	9.00193	9.19514	P	P	P	7.87203	7.8489	8.2547	P	P	P	CUST_137931_PI430048170	0	Coding	CGTGTGGATGTCGGTAACAGTTGTATAAAATAAATTCTATTTATCGCTATTGTACCCAGA	RefSeq	chr1	-	21596214	21669363
CUST_138088_PI430048170	0.000947532	2.43841	9.76763	9.66886	9.88382	P	P	P	8.37511	8.39282	8.68164	P	P	P	CUST_138088_PI430048170	0	Coding	AATGGCACATGCTTCCACTCCATCCATACTGGCATCCTCAAATAAACAGATATGTATACA	RefSeq	chr17	-	3565445	3592877
CUST_142940_PI430048170	1.90868e-05	0.384035	10.7954	10.7186	10.8595	P	P	P	12.1427	12.2543	12.1184	P	P	P	CUST_142940_PI430048170	0	Coding	TTGTGTACTGTTGCTTGGATGCGGCACAGTGGTTGGTAATGGAATAAAGGATGCATGGAT	RefSeq	chr15	+	80695310	80755621
CUST_133858_PI430048170	0.0021541	3.23095	10.0349	10.2064	9.92836	P	P	P	8.17284	8.65812	8.22592	P	P	P	CUST_133858_PI430048170	0	Coding	CCTCTGTCTAGCATGCCAACAAGAATGCATTGATATTGTGAACATTTGTGATATATGTAT	RefSeq	chrX	+	38561477	38688918
CUST_119419_PI430048170	0.00071563	0.494373	4.40344	4.67802	4.53245	P	P	A	5.57119	5.44234	5.65458	P	P	P	CUST_119419_PI430048170	0	Coding	AGAAAAGCTTCGTGGACTCGACCAGAGAAGCAAGAGCTCTGGATGGGCACATGGTGGTGC	RefSeq	chr11	+	112961246	113278436
CUST_142068_PI430048170	0.000776968	0.410442	6.59801	6.7663	6.4681	P	P	P	7.81007	7.91161	7.97571	P	P	P	CUST_142068_PI430048170	0	Coding	GCTTGAAACCAAAGCTTCAGATAAACTTGCAAGATAAGACAACTTTAAGAAACCAGTGTT	RefSeq	chr2	-	191029575	191151260
CUST_131486_PI430048170	0.000130928	0.490451	8.55747	8.41444	8.48788	P	P	P	9.47561	9.61508	9.4506	P	P	P	CUST_131486_PI430048170	0	Coding	TCCCCTCAGGACTGCAACAGGCTTGTGCAACAATAAATGTTGGCTTGGATTGGCAAAAAA	RefSeq	chr3	+	42489298	42537573
CUST_127615_PI430048170	0.000637704	0.344342	6.591	6.73083	6.57051	P	P	P	8.21726	8.29393	7.98284	P	P	P	CUST_127615_PI430048170	0	Coding	GGCCTCAAAGCAACCATGGCCTACTTAAAAACCAAACCAAAAATAAAGAGTTTAGTTGAG	RefSeq	chr11	+	61102457	61127851
CUST_141079_PI430048170	0.000235588	3.11617	9.57953	9.55204	9.61809	P	P	P	7.87427	8.04041	7.91109	P	P	P	CUST_141079_PI430048170	0	Coding	CTTCCAAAACCTGCTTCCTTCAGTTTGTAAAGTCGGTGATTATATTTTTGGGGGCTTTCC	RefSeq	chr22	-	39223679	39244952
CUST_1204_PI430048170	8.4732e-05	2.54836	11.5088	11.4346	11.6121	P	P	P	10.2091	10.1044	10.1967	P	P	P	CUST_1204_PI430048170	0	Coding	CCCTGGGGCCTTGATGGTGAAAATGCACCCCAAATGAAAAATAATTATTAAAAATGATCT	RefSeq	chr16	+	21678513	21760729
CUST_61423_PI430048170	0.000980623	5.55443	7.32638	7.38305	7.63781	P	P	P	4.77469	4.79212	5.31198	P	P	P	CUST_61423_PI430048170	0	Coding	TCTTTTCTCTTTGGGTGATAGTCAGAGAGTGGTGTTTTTGTTCAGGTGGGAAGGATTGGA	RefSeq	chr14	+	103928479	104052667
CUST_50149_PI430048170	0.0217537	3.16534	6.12154	5.92361	6.23926	P	P	P	4.72423	4.63585	3.78081	P	P	A	CUST_50149_PI430048170	0	Coding	TAATGCAGTGGTTTCTCTGGTCACTCACGGTCCAGCACTAGCACGCAGCAGTCGGGGAAA	RefSeq	chr6	-	167975923	167976939
CUST_127968_PI430048170	0.000802412	2.0616	10.3323	10.4144	10.5099	P	P	P	9.21592	9.46042	9.44184	P	P	P	CUST_127968_PI430048170	0	Coding	CCTCGGCATGTACTGTAGTCACTCAGTATTTGTATATGTTGCTAGAATTTAGATTGTAAA	RefSeq	chr3	-	98795969	98901689
CUST_135911_PI430048170	0.00152548	0.488173	6.53399	6.64178	6.30943	P	P	P	7.61852	7.62429	7.34887	P	P	P	CUST_135911_PI430048170	0	Coding	CAGAAATACATTAAGTGGGCTGGTCTCATGTAGTCCCCACATCATTGCAAATTACAAACC	RefSeq	chr19	+	14583083	14611144
CUST_137537_PI430048170	0.00128141	0.0710469	3.68409	3.17125	3.13461	A	A	A	7.10267	7.24967	7.14667	P	P	P	CUST_137537_PI430048170	0	Coding	ACTGCCTTTATTGTCCTTTTTGATACGAAGATGTGCTTTTTCTAGATGGAAAAGATGTGT	RefSeq	chr6_KI270798v1_alt	-	9443	17847
CUST_131762_PI430048170	0.00769621	0.498242	8.51313	8.29725	8.10074	P	P	P	9.29336	9.39911	9.25971	P	P	P	CUST_131762_PI430048170	0	Coding	GGGGAGAGTGGTGACTCCATTGACCCAGCTTTTCATTAAAGGATAACACACTGCAAAAAA	RefSeq	chr3	-	48403853	48429463
CUST_145541_PI430048170	0.000837575	2.46905	10.0373	10.1355	10.2514	P	P	P	8.69191	8.78723	9.02095	P	P	P	CUST_145541_PI430048170	0	Coding	CCAAGAATATATGCTACAGATATAAGACAGACATGGTTTGGTCCTATATTTCTAGTCATG	RefSeq	chr13	-	28300345	28495128
CUST_140518_PI430048170	0.00995468	7.14422	6.59232	6.68584	6.49132	P	P	P	3.12714	3.70846	4.22498	A	A	A	CUST_140518_PI430048170	0	Coding	CTGTGCCATACACTAAAAAACAACTGTTGCCTTCATACTATATTTGTTAGAGCAGAATAC	RefSeq	chr20	+	13995499	16053196
CUST_133860_PI430048170	2.10296e-06	3.19185	5.9651	5.9125	5.96743	P	P	P	4.31582	4.22902	4.27636	P	A	A	CUST_133860_PI430048170	0	Coding	GACCCAAACATGCTTTTAAATGTCTCATGCCAAGGCACTGAATTAAGACTTCTTAATGTT	RefSeq	chr1	-	115048010	115089500
CUST_132876_PI430048170	0.00486589	0.493768	6.76618	6.71962	6.42819	P	P	P	7.58841	7.73414	7.66475	P	P	P	CUST_132876_PI430048170	0	Coding	GCAGAGCATGAAGAATCAGTGGAAATATTAAGTGTTAAAATGTGATGTTTTCTTTCCTGC	RefSeq	chr3	-	57197915	57200252
CUST_141000_PI430048170	0.000606891	0.452263	8.74534	8.66086	8.81126	P	P	P	9.92231	9.98386	9.73836	P	P	P	CUST_141000_PI430048170	0	Coding	AGAAAAGAAAGCTACAGAAGAAACTGGGGCTCCTCCAGGGTGGCAGCAACAATAAATAGA	RefSeq	chr16	-	28537340	28539174
CUST_137513_PI430048170	1.97937e-05	0.359078	9.68469	9.71535	9.6226	P	P	P	11.1263	11.229	11.0985	P	P	P	CUST_137513_PI430048170	0	Coding	GATGTCTCCTTCCGCAGATTCATTTCTTTGTACTTAATAAACTTTAGTAAGTGGAAATGC	RefSeq	chr7	+	29806553	29917066
CUST_137614_PI430048170	0.000101377	79.0954	8.64101	8.59338	8.73994	P	P	P	2.25734	2.18129	2.58959	A	A	A	CUST_137614_PI430048170	0	Coding	CTGAAGATGCTTTTTGGAAAGCTCTGAATCTATACCTAATGCTCTTAATTATTGGCTTGT	RefSeq	chr18	+	63587299	63599199
CUST_94976_PI430048170	0.0401796	3.50585	5.11539	5.03788	4.93189	P	P	P	3.86881	2.47358	2.96372	A	A	A	CUST_94976_PI430048170	0	Coding	AGCATTCAGAGGGACATTGAATACTTTGTGAATCAACGCAAAACTGGACAGATTCCACCA	RefSeq	chr18	-	45983535	46072284
CUST_140938_PI430048170	0.00224431	2.42556	10.6937	10.7434	11.0541	P	P	P	9.47518	9.53479	9.66666	P	P	P	CUST_140938_PI430048170	0	Coding	GGCTGTGGCATTGTTGATGCTCACATATGATAAAAAAGTGTCCTATAATTCTATTGAAAG	RefSeq	chr2	-	223596939	223602499
CUST_127609_PI430048170	1.57832e-05	2.06287	11.4234	11.404	11.4972	P	P	P	10.4501	10.3443	10.396	P	P	P	CUST_127609_PI430048170	0	Coding	GACCAGGAAATCACTTGTATTTTGTTAGCCAATAAATTCCTAGCCAGTGTTGAATGAAAA	RefSeq	chr1	-	111483347	111504121
CUST_139765_PI430048170	4.06759e-06	0.140456	2.11219	2.09967	2.04267	A	A	A	4.88501	4.87298	4.99002	P	P	P	CUST_139765_PI430048170	0	Coding	ACTACCTATGCAACACTGTGTATTAGGTTTATCATCCTCATGTATTTTTATGTGACCTGT	RefSeq	chr4	+	87799549	87812449
CUST_54163_PI430048170	7.07343e-05	0.413589	7.56648	7.49112	7.37838	P	P	P	8.6537	8.8116	8.79297	P	P	P	CUST_54163_PI430048170	0	Coding	CTGGCATTCAAGTCATGGCTAGTCTGTGTATTTAATAAATGTGTGTTATTTATGTCGTGT	RefSeq	chr1	-	71005853	71047808
CUST_126888_PI430048170	0.0012965	2.28819	13.9567	14.008	14.2283	P	P	P	12.7999	12.8887	12.9333	P	P	P	CUST_126888_PI430048170	0	Coding	GTACCATGAGGGTTGCTATTTGTTGTTTTTAACAACTAATCAAGAGTGAGTGAACAACTA	RefSeq	chr8	+	19939070	19967259
CUST_129085_PI430048170	0.0126565	0.261839	2.31823	3.26793	3.43348	A	A	A	5.29479	4.44868	5.17015	P	P	P	CUST_129085_PI430048170	0	Coding	GATGCCTGTTATTTCACATCACTGTCTTTTTGTGTATCATAGTCTGCACCTTACAAATAT	RefSeq	chr5	-	142592177	142686495
CUST_135501_PI430048170	0.00383642	2.29786	12.0972	12.0462	12.346	P	P	P	10.9368	10.9523	11.0163	P	P	P	CUST_135501_PI430048170	0	Coding	TAGAAGGGACCCTCCTGTGGTCTTTGTCTTGATTTTTCTTAATAAACGGTGCTATCCCCG	RefSeq	chr1	-	21822231	21937297
CUST_127995_PI430048170	0.000732136	7.00073	6.57804	6.04184	6.56069	P	P	P	3.5138	3.50093	3.78647	A	A	A	CUST_127995_PI430048170	0	Coding	ATGGACTATCCATTAGAGCAACTTTCTGGGGCCTAATAAAACTGATGTGAAACTAAAAAA	RefSeq	chr19	-	51379908	51387956
CUST_137895_PI430048170	0.000451396	3.88176	7.69534	7.8762	7.59669	P	P	P	5.57267	5.99623	5.71044	P	P	P	CUST_137895_PI430048170	0	Coding	GGGGAGAATCAAAGCTTTCATTTCAGAAATGTTGCGTGGAAAAGTATCTGTAATTAAAGT	RefSeq	chr18	+	10454627	10488701
CUST_144571_PI430048170	0.000223604	2.2111	5.40758	5.2286	5.26785	P	P	P	4.05331	4.27906	4.13445	A	P	A	CUST_144571_PI430048170	0	Coding	CAGTGAATTCTACACCAACAGGTTAAAACCATGAAAATAAAATCAACCTGAATCGAAAGG	RefSeq	chrX	-	146814103	146814731
CUST_125019_PI430048170	0.00350262	0.463618	6.57288	6.38579	6.61724	P	P	P	7.65701	7.63153	7.62445	P	P	P	CUST_125019_PI430048170	0	Coding	ACATCCTGGAGCACCGGCTGCAAGTTGCCAGCGTCGCCAAGGAGAGTATCCCGCTGTTCA	RefSeq	chr7	-	100200654	100272232
CUST_80004_PI430048170	0.000474654	7.61858	16.3309	16.296	16.0983	P	P	P	13.2939	13.3247	13.3285	P	P	P	CUST_80004_PI430048170	0	Coding	GGACTGAAGTTCGCATTGAACTCTACAACATTCTGTGGGATATATTGTTCAAAAAGATAT	RefSeq	chr8	-	81478496	81483238
CUST_71309_PI430048170	0.000274149	0.492749	4.94124	4.74963	4.91732	P	P	P	5.93585	5.80218	5.93674	P	P	P	CUST_71309_PI430048170	0	Coding	CAATGACCAGCAGTTGGTATGAAGAACCTTTGACATTTTGTAAAAGGCCATTTCTTGGGA	RefSeq	chr20	-	47657405	47786616
CUST_145038_PI430048170	4.36161e-07	14.3449	6.20638	6.31245	6.34122	P	P	P	2.47779	2.35405	2.50001	A	A	A	CUST_145038_PI430048170	0	Coding	TTCTTGTCCTTGCTTTATAATGCATATGTGCTTAGAAATAAACAGGTTTCACGTGGACTC	RefSeq	chr6	+	168017872	168045089
CUST_139401_PI430048170	0.00584342	0.373418	4.70657	4.0144	4.40273	P	A	P	5.63212	5.653	6.1279	P	P	P	CUST_139401_PI430048170	0	Coding	GGTTCACATCTTGTTTCCTATAGAAATGTCCTGTATTCTGGGATCAATTTCCAAATGCTT	RefSeq	chr22	-	32190434	32203477
CUST_127882_PI430048170	0.00193566	0.333423	5.92191	6.04775	5.63741	P	P	P	7.5028	7.52477	7.35762	P	P	P	CUST_127882_PI430048170	0	Coding	GTCCAGAATGCCTGCAAATTGCTGTAATTTTATACCATGTTCTAACCAATAAACAGAACT	RefSeq	chr5	+	170504035	170736632
CUST_79677_PI430048170	0.00878862	2.94214	5.21023	5.9508	5.49528	P	P	P	4.35183	4.08457	3.53013	A	A	A	CUST_79677_PI430048170	0	Coding	TTGTGAAGACAAGCTAGACGGCAGATGAAAGTTCTTGGCACAGAGTGAACACTTGATAAA	RefSeq	chr8	+	27311481	27459391
CUST_140377_PI430048170	0.00272413	2.81219	6.59173	6.15164	6.05367	P	P	P	4.84347	4.55327	4.95468	P	P	P	CUST_140377_PI430048170	0	Coding	ATTTCAGTGGACATCTGGACATATTTATGGACTTTGAGTATCTAGCAAGTAGAAAGGAAA	RefSeq	chr15	-	45482480	45522804
CUST_92548_PI430048170	0.00105187	4.15983	8.1563	8.45032	8.51372	P	P	P	6.25291	6.04308	6.61956	P	P	P	CUST_92548_PI430048170	0	Coding	AAGGGGGTCTAAGGTCTATCAAGTCAATCATTTCTCACTGTGTACATAATGCTTAATTTC	RefSeq	chr3	+	155080289	155183729
CUST_108749_PI430048170	0.000206969	0.468296	8.84612	8.85742	8.97236	P	P	P	9.91215	10.0992	9.94444	P	P	P	CUST_108749_PI430048170	0	Coding	AGTGCCCTCTGGTGGCAGTCATCAAAATCGCTTCTAGACTTGTTTTTATTTTTAAATAAA	RefSeq	chr6	-	154154482	154330081
CUST_132162_PI430048170	0.000143393	3.44233	7.53981	7.49438	7.72077	P	P	P	5.97366	5.7488	5.67542	P	P	P	CUST_132162_PI430048170	0	Coding	GATACTCATAAGCAATTTTCTGTGTGTAGGATAAAATAAACCATCTTGTATGGGATCTGC	RefSeq	chr10	-	49154723	49188400
CUST_53542_PI430048170	0.00883251	15.0214	6.51439	7.07861	6.55833	P	P	P	2.0994	3.65598	2.15942	A	A	A	CUST_53542_PI430048170	0	Coding	GAGAATTTTTACGCAAGAAGAGCCAAATTGACTCTCTAAATCTGGTGTATGGGTATTAAA	RefSeq	chr1	+	20070207	20091901
CUST_106529_PI430048170	0.00169443	0.426745	8.88448	9.03781	8.64026	P	P	P	10.1809	10.1446	9.9386	P	P	P	CUST_106529_PI430048170	0	Coding	TAAAGCTGCTCCACCCCCAGATTGCAATGCTACCAATAAAGCCGCCTGGTGTTTACAACT	RefSeq	chr9	-	34689569	34691277
CUST_131901_PI430048170	0.000201299	0.465557	10.3228	10.4424	10.2466	P	P	P	11.5085	11.4943	11.3169	P	P	P	CUST_131901_PI430048170	0	Coding	CAATCCTGATTATGTGAAAATATGGTTGCTGTTTAAGTGATGCTGAATTTGCTGTGTGTT	RefSeq	chr15	-	51723063	51738123
CUST_113652_PI430048170	1.08135e-06	22.6715	9.61101	9.43252	9.63481	P	P	P	4.9646	5.14305	5.06508	P	P	P	CUST_113652_PI430048170	0	Coding	TTTGAAAAAAAGAAAAGAACGTGCAAAAGAACACAACCTAAAAGTGGCTTCAGAGGAAAA	RefSeq	chr9	-	38571363	38620363
CUST_69807_PI430048170	0.00153759	0.30538	7.7617	7.7733	7.47922	P	P	P	9.38825	9.33731	9.43959	P	P	P	CUST_69807_PI430048170	0	Coding	CACTGATGACACAACAGAAAAGAAACTGTAGACCTTGGGACAATCAACATTTAAATAAAC	RefSeq	chr1	-	89258950	89272861
CUST_139121_PI430048170	0.0170588	0.449044	7.27109	7.38899	6.81136	P	P	P	8.24399	8.38391	8.3669	P	P	P	CUST_139121_PI430048170	0	Coding	GTTAGAGACATGAAATGTACTAGAGGAGCCCTTTTCCAATGGAAATATTATATACCACAT	RefSeq	chr4	+	67558727	67606898
CUST_94199_PI430048170	0.00371142	2.21458	7.43628	7.49253	7.5114	P	P	P	6.15427	6.43022	6.40011	P	P	P	CUST_94199_PI430048170	0	Coding	AGTAAGACAACTATTAGAGACCATGGCGAGGAATGAAGTGATTGCTGACATTAATTGCAA	RefSeq	chr18	-	24162045	24397869
CUST_142917_PI430048170	0.000183211	3.20718	8.8305	8.90785	8.84114	P	P	P	7.1629	7.08956	7.27805	P	P	P	CUST_142917_PI430048170	0	Coding	CTGCAGAAGCTAATACAAGGGACACTGGTCTTTTGACAAAATAAACTTGTGTAAATTTTG	RefSeq	chr2	+	56184122	56386174
CUST_144867_PI430048170	0.000120372	2.93244	11.3898	11.4892	11.609	P	P	P	9.92765	9.81882	10.0815	P	P	P	CUST_144867_PI430048170	0	Coding	GCTGAAGTGTTCATAAGATAACAATAGGCTTGAATCTCCAATTCAAATGAATGTCAAAGC	RefSeq	chr16	+	85899167	85922605
CUST_133686_PI430048170	0.000498951	2.58201	6.52567	6.61579	6.49879	P	P	P	5.1799	5.16868	5.18872	P	P	P	CUST_133686_PI430048170	0	Coding	TGACTCAAGATTCCAAGGAGTTCTGCTCATTCTAATGATGGCCCATTCTACTTGCTCTGG	RefSeq	chr15	+	43692885	43699222
CUST_56942_PI430048170	2.4512e-05	2.95572	8.72255	8.60578	8.57952	P	P	P	6.99492	7.05235	7.16864	P	P	P	CUST_56942_PI430048170	0	Coding	CAAAATTCTGTTTCGTGTGGACAGTAAGCAGATGAACTTGCTTGCTGTTCTCGAAGTGAG	RefSeq	chr10	-	124007665	124093607
CUST_111925_PI430048170	0.00238373	0.447573	6.66655	6.43257	6.77855	P	P	P	7.82922	7.6951	7.84924	P	P	P	CUST_111925_PI430048170	0	Coding	AGGTGGTGTTTCCCTACACAAGCAAGAGCTGCATGCGGGCCGTGCTGGAATACCTCTACA	RefSeq	chr8	+	22999578	23020197
CUST_143010_PI430048170	0.000110615	10.1196	10.2362	10.1473	10.3171	P	P	P	7.07153	6.87372	6.72167	P	P	P	CUST_143010_PI430048170	0	Coding	CCTGGAGATTCTGAAGTGCCTTTGCTGTGGTTTTCAAAATAATAAAGATTTGTATTCAAC	RefSeq	chr10	-	47467993	47484158
CUST_143346_PI430048170	0.0122158	3.04467	7.01444	7.11314	6.24633	P	P	P	5.50419	4.73079	5.35503	P	P	P	CUST_143346_PI430048170	0	Coding	TGACAATTTCGTGAAGCTCATTTCATGGTACGACAACGAATATGGCTACAGTCACCGGGT	RefSeq	chr19	+	35533411	35545319
CUST_140744_PI430048170	0.000204795	2.35935	13.9757	14.1366	14.1962	P	P	P	12.7312	12.8989	12.9622	P	P	P	CUST_140744_PI430048170	0	Coding	CCCCAAACCATAAAACCCTATACAAGTTGTTCTAGTAACAATACATGAGAAAGATGTCTA	RefSeq	chr9	+	73151730	73170394
CUST_90835_PI430048170	0.00807276	0.459418	4.3427	3.9466	3.79854	P	A	A	5.29993	5.32907	4.82884	P	P	P	CUST_90835_PI430048170	0	Coding	TATTGTCGGCTTTCGCCAAATCACAAAGTCCTGCATTACGGAGACTTAGAAGAGAGTCCT	RefSeq	chr7	-	36852905	37353668
CUST_137688_PI430048170	0.0155257	0.191905	4.56796	4.50419	5.61892	P	A	A	7.31477	7.23193	7.55763	P	P	P	CUST_137688_PI430048170	0	Coding	CATCTTTCATACCATATCACACTACTACCACTTTTTGAAGAATCATCAAAGAGCAATGCA	RefSeq	chr4	+	69995930	70002456
CUST_138403_PI430048170	0.00127028	2.93022	7.47093	7.57184	7.53302	P	P	P	5.97959	5.81631	6.11339	P	P	P	CUST_138403_PI430048170	0	Coding	AGCTATTCCCTCCAGCATCTGGTTCTGTACAAAAATTAAATGCTTATTTGTTTAAGTCTC	RefSeq	chr22	-	37469062	37486440
CUST_99370_PI430048170	0.000161481	0.295431	9.51992	9.36507	9.39659	P	P	P	11.1046	11.1077	11.3386	P	P	P	CUST_99370_PI430048170	0	Coding	CTGGCACTTTATTTTACTTCTAACCTTGTTTCCTGACGGTGTACAGAATCAACAAAATAA	RefSeq	chr21	+	33070143	33072422
CUST_130388_PI430048170	0.0111062	3.14284	10.6278	10.7106	10.1376	P	P	P	8.83994	8.89935	8.84344	P	P	P	CUST_130388_PI430048170	0	Coding	GACTAAGGCTGGTATTCTAGAACACGCCTTTCACTGATTGTGTTAAATAAAAGAGAAAGA	RefSeq	chr9	+	135343248	135346558
CUST_128583_PI430048170	0.000218107	0.233814	12.7341	12.5114	12.6861	P	P	P	14.7719	14.5379	14.898	P	P	P	CUST_128583_PI430048170	0	Coding	TTCGACCAATTCAACCCTTTGCCCCACCTTTATTAAAATCTTAAACAACGGGTCAAAAAA	RefSeq	chr5	-	140631727	140633701
CUST_144627_PI430048170	0.00468494	0.212022	3.1264	2.72596	3.39385	A	A	A	4.73161	5.66877	5.47665	P	P	P	CUST_144627_PI430048170	0	Coding	CAGACTACAGTGGATGTATTTTAGGCTGTATACATATTTAGCTCTTTTTGGTAAATAGGG	RefSeq	chr4	-	24998848	25030792
CUST_135913_PI430048170	1.27986e-05	0.313751	14.1515	14.1345	14.0048	P	P	P	15.801	15.6898	15.818	P	P	P	CUST_135913_PI430048170	0	Coding	TTTATACCCACACACCTGTCTACAGTGTCATTCAATAAAGTGCACGTGCTTGTGAAAAAA	RefSeq	chr11	+	313990	315272
CUST_127007_PI430048170	4.14898e-05	0.459514	11.5017	11.6248	11.6186	P	P	P	12.6551	12.6972	12.7597	P	P	P	CUST_127007_PI430048170	0	Coding	CGCCTTGCTCTTGAAAGTGCAGTATTTTTCTACATCATGTCAAGAATGATTCAATGTAAA	RefSeq	chr8	+	24384284	24406013
CUST_129462_PI430048170	0.00081641	0.440091	6.79364	6.52112	6.53482	P	P	P	7.95679	7.62968	7.81361	P	P	P	CUST_129462_PI430048170	0	Coding	AGGAGATTCCCTGTCCTTGATTTTTGGAGACACAATGGTATAGGGTTGTTTATGAAATAT	RefSeq	chr6	+	12290295	12297194
CUST_61273_PI430048170	1.77929e-05	0.323672	10.241	10.2427	10.1016	P	P	P	11.9173	11.7563	11.7934	P	P	P	CUST_61273_PI430048170	0	Coding	TTTTGCCCCTGGCAGGATTGCTACAGTTGTGATTGGAGGAGTGTGGCTGTGCCCATGGTG	RefSeq	chr14_KI270847v1_alt	+	1225376	1231261
CUST_144725_PI430048170	0.000139943	5.13207	8.71286	8.70206	8.91521	P	P	P	6.46645	6.43071	6.36257	P	P	P	CUST_144725_PI430048170	0	Coding	TCTCAGTGTGGAGGAACTGGCTGCACGTGGGACCTGAAGGTGCCCTCTGTGTTTATGTTG	RefSeq	chr2	+	26692712	26731198
CUST_103545_PI430048170	0.000704717	0.470494	9.10419	9.24948	9.37097	P	P	P	10.2368	10.3613	10.3972	P	P	P	CUST_103545_PI430048170	0	Coding	AACATGACTATCCAGGCTTGGGCAAGTGGAACAAGAAACTCCTTTACGAGAAGATGAAGG	RefSeq	chr15_KI270905v1_alt	+	4856252	4911692
CUST_132534_PI430048170	0.000332729	5.88977	9.35159	9.69963	9.69963	P	P	P	6.80725	6.91453	7.32784	P	P	P	CUST_132534_PI430048170	0	Coding	GGCAACAAAACTTGTGGTCTTTACTTTTGAATAGCTACCCAAGAAAAGGTTTTAAAGGTA	RefSeq	chr7	-	77193370	77199833
CUST_118450_PI430048170	0.0082474	2.22564	7.56323	7.64071	7.68653	P	P	P	6.34336	6.72346	6.32791	P	P	P	CUST_118450_PI430048170	0	Coding	CTTAGTAGAGGCACTAACCATGTGACCCAAGGCAAAAGTGCTTAAGAAAAAGTGCTTTCT	RefSeq	chr1	-	111722063	111739424
CUST_92702_PI430048170	0.00939298	2.05554	6.50865	6.55885	6.67665	P	P	P	5.28145	5.74947	5.5619	P	P	P	CUST_92702_PI430048170	0	Coding	AATCTTCCTGAGTAATTAAATGGACCAACAATGAGCCTTTGCAAAATTTTCAAGCGGAAA	RefSeq	chr1	+	70411217	70439851
CUST_131812_PI430048170	0.0016113	3.1621	9.63989	9.77276	9.964	P	P	P	8.11365	8.10328	8.19385	P	P	P	CUST_131812_PI430048170	0	Coding	CCTTTTAGACATTCGTCAGCCTCTTCTAATAAACCTTTGTACTATGTAAACATCAGGAAA	RefSeq	chr2	-	223975047	224039319
CUST_130255_PI430048170	0.00118478	0.492281	12.1312	12.0711	11.8596	P	P	P	13.0132	13.143	12.9819	P	P	P	CUST_130255_PI430048170	0	Coding	CCCGAGGACCGTCCATGGACCTTATTTTTATATGAGATTAATAAAGATGTTTGCAAAAAA	RefSeq	chr17	+	45221924	45247316
CUST_141740_PI430048170	0.00192994	3.04316	11.2002	11.3405	11.591	P	P	P	9.70789	9.76788	9.86244	P	P	P	CUST_141740_PI430048170	0	Coding	GTCACTATTTTGTAATAAATGTGGCTGGAGCTGATCCAGCTGTCTCTGACCTACAAAAAA	RefSeq	chr1_GL383518v1_alt	+	91992	96858
CUST_65017_PI430048170	0.00014055	0.356425	8.29899	8.36681	8.17884	P	P	P	9.71703	9.77899	9.81805	P	P	P	CUST_65017_PI430048170	0	Coding	TGCGAGTCACTCTGCTACAATCCAGCTTCTAATCCGCCCAAAAGCGGCAGCCAATCGGAG	RefSeq	chr19	-	48837096	48868627
CUST_101425_PI430048170	8.99035e-05	0.324591	9.08386	9.25055	9.2376	P	P	P	10.8117	10.9359	10.6897	P	P	P	CUST_101425_PI430048170	0	Coding	TTGCCCAAAACTGTCATCCTAACGTTTGTCATTCCAGTTTGAGTTAATGTGCTGAGCATT	RefSeq	chr4	-	108047544	108168956
CUST_130836_PI430048170	4.78032e-05	2.1344	10.0637	10.201	10.1775	P	P	P	9.0451	8.99082	9.12534	P	P	P	CUST_130836_PI430048170	0	Coding	GTAGCTGCCAGTCCGTGATTTTAATTGCTGTCTTGAAGTTAACAAGTGTTATAATGAAAT	RefSeq	chr18	-	24162045	24397869
CUST_144671_PI430048170	0.0012689	2.17233	12.0437	12.1201	12.3812	P	P	P	10.914	11.0832	11.1981	P	P	P	CUST_144671_PI430048170	0	Coding	ATCATTTGTTGGAATGAATTAAATAAACCCTTCCTGGGGCATCTGGCGAATCCCAAAAAA	RefSeq	chr20	-	23045632	23049664
CUST_129575_PI430048170	0.000144635	5.2336	9.32461	9.46576	9.34323	P	P	P	6.81892	7.03905	7.10133	P	P	P	CUST_129575_PI430048170	0	Coding	CCGGTGACCCTATCATTTTCCAAATAATTGTTGCTAGTACTTAGTTAATTAGACCCATTT	RefSeq	chr3	+	189171973	189323482
CUST_62852_PI430048170	3.71814e-06	4.06295	10.7028	10.804	10.6782	P	P	P	8.68404	8.7655	8.66909	P	P	P	CUST_62852_PI430048170	0	Coding	AACACCAGGGCCTGGCCCAGTGGATTTCATGGTGATCATTAAAAAAGAAAAATCGCAACC	RefSeq	chr17_KI270857v1_alt	+	827290	836298
CUST_129150_PI430048170	0.0120718	0.478811	10.8078	10.6867	11.1702	P	P	P	11.8985	12.0483	11.9462	P	P	P	CUST_129150_PI430048170	0	Coding	TTTCACCCCAGAGGACACAGGCAGCTTCCAAAATATATTTATCTTCTTCACGGGAAAAAA	RefSeq	chr15	-	88898682	88913432
CUST_131253_PI430048170	0.000607245	0.493464	9.05712	9.2006	8.98102	P	P	P	10.0604	10.2444	9.98718	P	P	P	CUST_131253_PI430048170	0	Coding	TCCTCCCTCTCGCAACCGACCAAAATTTTGACAACGATGATGTTCACCAGAAGGAAAAAA	RefSeq	chr11	+	35618186	35620873
CUST_136286_PI430048170	6.62534e-06	4.35179	11.7439	11.7427	11.8744	P	P	P	9.58322	9.65668	9.75504	P	P	P	CUST_136286_PI430048170	0	Coding	CTTTGGCTATTATGAAAGAGGTTAGTGTGTTCCCTGCAATAAACTTGTTCCTGAGAAAAA	RefSeq	chr15	-	74179465	74202879
CUST_129681_PI430048170	0.00293848	7.4666	5.2523	5.81877	5.77561	P	P	P	2.774	3.15439	2.09005	A	A	A	CUST_129681_PI430048170	0	Coding	TAACCCTAGATAGAATCTAATGAACTCAGAGGCTTAGCTCGCCTCTTTAGGGTCCATGGT	RefSeq	chr6	+	42155405	42180056
CUST_144851_PI430048170	0.000242719	6.80665	7.70745	7.89333	7.55518	P	P	P	4.87628	4.97576	5.01932	P	P	P	CUST_144851_PI430048170	0	Coding	GATAATGTACCCAAATACTATGGCCAGATAATAAATTGTGCTGCAAACAACATGTCTTGT	RefSeq	chr10	+	88880186	88923502
CUST_131365_PI430048170	0.000131993	2.95416	9.80794	9.70836	9.97301	P	P	P	8.26585	8.13778	8.39816	P	P	P	CUST_131365_PI430048170	0	Coding	CGGGACCAACTCTTTGTATAACCTACCTGAATGTATTAAAAACTAATTTTGGAGAAGCAA	RefSeq	chr11	-	76657523	76670000
CUST_134165_PI430048170	0.00466883	0.192448	3.71328	3.03503	3.20625	A	A	A	5.67749	5.66199	5.83018	P	P	P	CUST_134165_PI430048170	0	Coding	GTACAGTCTGTAGTTAGGAGGTATAGCCTATAGCTTATGTTAAATGGTTGAAATGGTTCT	RefSeq	chr6	-	24804280	24911170
CUST_135478_PI430048170	0.0100911	0.428131	5.77701	5.85595	5.74363	P	P	P	6.89631	7.28168	6.83023	P	P	P	CUST_135478_PI430048170	0	Coding	GGGAGAGAAATGTCCAAAAGAGATCTGCTGATCTGCTGAGAGTTTCAAACAAACAAAAAA	RefSeq	chr11	+	36296174	36465204
CUST_135492_PI430048170	0.00515342	2.3768	9.64227	9.6551	9.72951	P	P	P	8.21994	8.44071	8.59616	P	P	P	CUST_135492_PI430048170	0	Coding	GTGATGTGTATGTGTATATACTGTATGTGTACTTTTTAAAATAGGTGTATGTCCCAACCC	RefSeq	chr12	-	88492792	88580473
CUST_130269_PI430048170	0.000109061	6.43974	5.47515	5.07304	5.37452	P	P	P	2.77604	2.36626	2.71611	A	A	A	CUST_130269_PI430048170	0	Coding	GGGTCATATAGTCTTGTAGAAGCACAGAAGTCAAAAGTGTAGCTAATGCTTGATATGTTC	RefSeq	chr1	+	100719639	100739046
CUST_140525_PI430048170	0.01707	0.497458	7.71465	7.59473	7.2194	P	P	P	8.56847	8.55835	8.46681	P	P	P	CUST_140525_PI430048170	0	Coding	CAGCAGATACTTTGTCAGCAATACTAAGGGAAGAAACAAAGTTGAACCGTTTCTTTAATA	RefSeq	chr3	-	119524292	119559634
CUST_130410_PI430048170	0.0119703	0.380941	3.78961	4.20011	3.39434	A	A	A	5.04873	4.90504	5.61747	P	P	P	CUST_130410_PI430048170	0	Coding	GAAGGACCAATGAATGTTAATTGAAATATGAAAGCTGAAATGCAACAAACAACTTCCGCT	RefSeq	chr1	+	158831377	158849480
CUST_136316_PI430048170	0.000139875	0.408276	7.09563	6.97094	7.16911	P	P	P	8.44665	8.34433	8.32581	P	P	P	CUST_136316_PI430048170	0	Coding	GAAGCCTCTGTACCCAACCCTGACCTATGTGGACCAGTCCCATAAACATTCAATAAATGT	RefSeq	chr1	+	52633393	52657065
CUST_135634_PI430048170	0.000510332	2.75353	7.06944	7.30443	7.28992	P	P	P	5.57995	5.93516	5.75479	P	P	P	CUST_135634_PI430048170	0	Coding	TGTGGCATCAGATAAAAACGTGGGAGTTTTTCCATATAATTCCCAGCCTTACTTATAAAT	RefSeq	chr2	+	237487218	237555318
CUST_136718_PI430048170	0.000937655	2.36452	6.91461	6.66811	6.80375	P	P	P	5.35369	5.69127	5.60642	P	P	P	CUST_136718_PI430048170	0	Coding	GTTGTGGACCCAGGAAATTTTCCATAAGTCTTGCTTGATAACAATGTGATTGTACAAAAT	RefSeq	chr6	+	56954974	57027344
CUST_79650_PI430048170	0.00875531	0.478042	5.83146	5.84065	5.35337	P	P	P	6.70648	6.6218	6.92597	P	P	P	CUST_79650_PI430048170	0	Coding	CTGGAACGACTGTGGGTCTTGCATTTATGTCTACAATGTGTTCTCCTTATTCTGTTGGCG	RefSeq	chr8	+	24294039	24359018
CUST_143511_PI430048170	0.000147335	4.98264	7.14211	6.93025	7.20286	P	P	P	4.81512	4.69377	4.82588	P	P	P	CUST_143511_PI430048170	0	Coding	TGGCTATCATGGTTGTGTTAATCGATTGTGGGGATGAAATGTCATTGTGTATGGAAGGCG	RefSeq	chr1	+	43269993	43274002
CUST_131934_PI430048170	3.92411e-05	2.73414	8.1601	8.19887	8.29964	P	P	P	6.765	6.67857	6.85971	P	P	P	CUST_131934_PI430048170	0	Coding	GACTTTGTTTATTTAAAGTTTCTTGCTGTGAAAAAGAACTCCCTACCTGTGAGTTCCTTT	RefSeq	chr8	-	74234703	74321327
CUST_128763_PI430048170	0.0156741	0.474517	6.40779	6.30258	5.74687	P	P	P	7.08191	7.07978	7.55222	P	P	P	CUST_128763_PI430048170	0	Coding	TGAGGCAGCCAGCAGATCTCAGCAGCCCAGTCCAAATAAACTCCCTGTCAGCAGCAAAAA	RefSeq	chr12	+	6772503	6778455
CUST_142895_PI430048170	0.00271901	0.34406	7.58564	7.55303	7.32388	P	P	P	9.04195	9.02165	9.03052	P	P	P	CUST_142895_PI430048170	0	Coding	GACACCCAAGCAGAGCAATCAGTTAGTGAATTGAATGGAAATAAACGCTTTAGTTATAAT	RefSeq	chr1	+	22710837	22921500
CUST_132205_PI430048170	0.00748379	0.488582	5.46986	5.06862	5.30621	P	P	P	6.50546	6.41625	6.00271	P	P	P	CUST_132205_PI430048170	0	Coding	GCTGTTCTGCTCATATATGAATTTTTAATGCAGCAATGTTGACTTTGTTTCATACTGCCA	RefSeq	chr12	-	70638072	70920804
CUST_141255_PI430048170	0.00111617	5.94256	9.51747	9.50447	9.54876	P	P	P	6.76009	7.06673	7.01278	P	P	P	CUST_141255_PI430048170	0	Coding	CTGTGAATGAGAAAGTATTTGTCTCTCCAACTTGAAAATGCACTGTATTTCCTGTGATAT	RefSeq	chr6	-	118959828	119078647
CUST_132050_PI430048170	0.00153679	4.78591	7.32193	7.21388	7.45056	P	P	P	4.81738	4.99277	5.3563	P	P	P	CUST_132050_PI430048170	0	Coding	TACTGATGTTCCTAGTGAAAGAGGCAGCTTGAAACTGAGATGTGAACACATCAGCTTGCC	RefSeq	chr2	-	161992244	162074542
CUST_127455_PI430048170	0.000611796	0.493731	7.18332	7.10032	7.25919	P	P	P	8.19177	8.17505	8.23434	P	P	P	CUST_127455_PI430048170	0	Coding	TCTCAGAACTCTGCATCCTGCGGAACTGTTTTAATTACAATTATACTAACAATACACATG	RefSeq	chrX	-	78656068	78659328
CUST_142436_PI430048170	0.00807826	2.3232	10.0985	10.0955	10.4599	P	P	P	8.98487	8.99259	9.0583	P	P	P	CUST_142436_PI430048170	0	Coding	AGATGAAGTAAATGCAGTGTTCTACTGCCTGATGTGAAAGAGAGCTATGTATGATAATTA	RefSeq	chr5	+	612289	653551
CUST_131744_PI430048170	0.0361869	2.55253	5.6517	4.59543	4.76083	P	P	P	4.10279	3.28631	3.68367	A	A	A	CUST_131744_PI430048170	0	Coding	ACCTCACAGTACTGGTTAATTAAACTTTATTGCTCACTGTCCACTTTTGTGCTGAAAAAA	RefSeq	chr14	+	95686416	95692643
CUST_140693_PI430048170	2.32842e-06	0.276543	8.11166	8.17572	8.22094	P	P	P	10.0869	10.0108	9.97359	P	P	P	CUST_140693_PI430048170	0	Coding	TTTCAGAGCCAGATCATTTCTTGGAAAGTGTAGGCTTACCTCAAATAAATGGCTAACTTA	RefSeq	chr7	+	22727146	22732002
CUST_130319_PI430048170	0.00413068	0.47107	8.94764	8.98617	9.03233	P	P	P	10.021	10.241	9.94683	P	P	P	CUST_130319_PI430048170	0	Coding	GCCCTCTGGTGGCAGTCATCAAAATCGCTTCTAGACTTGTTTTTATTTTTAAATAAAAGA	RefSeq	chr6	-	154154482	154330081
CUST_133580_PI430048170	0.0119867	2.61516	8.05388	8.18863	7.57906	P	P	P	6.50337	6.68735	6.53164	P	P	P	CUST_133580_PI430048170	0	Coding	CTGTTTATCACTCCAGTGATTTTGAGTTTGCAGTTTCACAATCAGTTCTTCATTTCATGA	RefSeq	chrX	-	34627063	34657288
CUST_136341_PI430048170	0.00209422	0.393751	6.41088	6.67968	6.61737	P	P	P	7.94106	7.93944	7.87386	P	P	P	CUST_136341_PI430048170	0	Coding	TCACGGAGAAGGCAGCCTACATAGGCACCTCCAACTGGTCGGAGGATTACTTCAGCAGCA	RefSeq	chr14	+	104924815	104933236
CUST_134144_PI430048170	0.00215815	0.48424	4.69554	4.78567	4.60773	A	P	P	5.75135	5.7486	5.73304	P	P	P	CUST_134144_PI430048170	0	Coding	ACTGAGAATAGACTAGCATTTGTGGGGCACTCAATAAATTTAAATTCATGGTGACAGTGA	RefSeq	chrX	-	112630650	112680147
CUST_133705_PI430048170	0.00262253	2.3753	7.20253	7.03759	6.96137	P	P	P	5.5663	5.88694	5.98243	P	P	P	CUST_133705_PI430048170	0	Coding	CTGTCAGTGGTTTCCTCATTTTGCCATGCTTTGTAAAAATAAAAAGAATGATCAAGTAGG	RefSeq	chr4	-	119494394	119628826
CUST_119489_PI430048170	0.000204449	4.65514	7.23495	7.57841	7.52014	P	P	P	5.16028	5.4638	5.0425	P	P	P	CUST_119489_PI430048170	0	Coding	TCTGCCATAGAGCAGGACATCTTGGTGAAGGGGACCATCCTGAAGTACAGCGGCTCCATC	RefSeq	chr11	-	130404922	130428644
CUST_106222_PI430048170	0.000649548	2.16288	5.73698	5.68712	5.46056	P	P	P	4.46403	4.42423	4.66102	A	A	A	CUST_106222_PI430048170	0	Coding	AATGACCAACATGTATTAAGATGGACACCTACTCTACGAAACACGAAGTTCTATGGTCTC	RefSeq	chr3	+	183253243	183273391
CUST_127100_PI430048170	0.00370497	5.27352	8.05467	7.99752	8.06062	P	P	P	5.36609	5.59343	5.90646	P	P	P	CUST_127100_PI430048170	0	Coding	CTTCTAGCATTTCTTCCAATTATTACAGTCCTTCAAGATTCCATTTCTTAACAGTCTCCA	RefSeq	chr1	+	43337803	43354464
CUST_143829_PI430048170	1.14679e-05	0.382666	7.52939	7.49141	7.57086	P	P	P	8.91253	8.86132	8.97422	P	P	P	CUST_143829_PI430048170	0	Coding	CCCATCCTTATTAGCTCTACTGGAATTTTCATACACGTAAATGCAGAAGTTACTAAGTAT	RefSeq	chr10	+	43077068	43130349
CUST_133695_PI430048170	0.0102783	2.57445	4.87617	4.89791	4.81365	P	P	P	3.71956	3.5294	3.20033	A	A	A	CUST_133695_PI430048170	0	Coding	ACTGCGGATCCCAAACTGTTCCCTTTTTCATTTCTTGAAATGTTACCACTACAGACATTT	RefSeq	chr5	-	38474962	38556646
CUST_142744_PI430048170	0.00914409	0.452641	9.83183	9.98093	9.47078	P	P	P	10.8933	11.0294	10.8308	P	P	P	CUST_142744_PI430048170	0	Coding	GCCACTGTGCTGAATTCTGCAATGTTTTCCTTTGTCATCATTGTATATATGTGTGTTTAA	RefSeq	chr7	+	24284187	24291865
CUST_144417_PI430048170	0.0022694	2.0758	8.23146	8.57102	8.27788	P	P	P	7.20208	7.29723	7.43455	P	P	P	CUST_144417_PI430048170	0	Coding	TTACCTTTAACGTGAACTCACAGGCGGATTAAAGTGAAATAAAACCTACCATTTGAGTTA	RefSeq	chr5	-	135444213	135447348
CUST_128434_PI430048170	0.00814297	11.1189	8.74498	8.44344	8.51928	P	P	P	4.62585	4.60746	5.75027	P	P	P	CUST_128434_PI430048170	0	Coding	TTCTCAGGCTCCCATGAGAAAACAATCTATACTTATCTTCCGTGAATAAACAAGTGTCAC	RefSeq	chr17_KI270857v1_alt	-	89487	103423
CUST_134654_PI430048170	0.00372294	0.437704	5.8256	5.7304	5.37766	P	P	P	6.74556	6.78862	6.99988	P	P	P	CUST_134654_PI430048170	0	Coding	CCACCTTTCCTCAGACTATTTTTCAGCCTTCTGGCATCAGCAAACCTTATAAAATTTTTT	RefSeq	chr19_KI270890v1_alt	-	81937	92852
CUST_130206_PI430048170	0.000396221	3.8984	6.09852	5.69115	5.79349	P	P	P	3.881	4.05804	3.77273	A	A	A	CUST_130206_PI430048170	0	Coding	TAGAGAACATGGTGCTTAGGGTCTGAGACCTTTTGAAAGGTCTGAGAACTCTTTAAAAAA	RefSeq	chr5	-	39284275	39364553
CUST_143984_PI430048170	0.00246521	0.493096	9.08281	9.45948	9.23505	P	P	P	10.2016	10.4326	10.2165	P	P	P	CUST_143984_PI430048170	0	Coding	AGCCAGAGGCTGGGTTCATTTGTGTAACGACAATAAACGGTACTTGTCATTTCGGGCAAA	RefSeq	chr2	-	20200796	20225433
CUST_131404_PI430048170	0.0139177	2.4939	5.76336	5.50559	5.44732	P	P	P	3.98779	4.02602	4.66314	A	A	P	CUST_131404_PI430048170	0	Coding	GGATTTGTCTGCCTTTTCAACACTATACTGAGCAATAACAATAAATGCACACGTGGAAAT	RefSeq	chr3	-	10324022	10505584
CUST_142190_PI430048170	0.00189685	2.87817	9.48472	9.41424	9.40398	P	P	P	7.73941	8.04845	7.92433	P	P	P	CUST_142190_PI430048170	0	Coding	GGAAAATAAACTATCAGCTTGGATGGTCACTTGAATAGAAGATGGTTATACACAGTGTTA	RefSeq	chr3	+	183253243	183273391
CUST_137832_PI430048170	0.000791549	0.403247	9.54769	9.71292	9.48961	P	P	P	10.9461	10.8871	10.8557	P	P	P	CUST_137832_PI430048170	0	Coding	ACTAACTACTCTGGCGTCAATGGATATTCTGTATAATACTATCAAGTCCCTTTTCTCTTG	RefSeq	chr13	-	99254712	99258428
CUST_136160_PI430048170	0.00148437	3.73451	13.0438	13.0941	13.3256	P	P	P	11.2588	11.2286	11.2886	P	P	P	CUST_136160_PI430048170	0	Coding	GCACTCAGCTTCCCAGGCAATAACAGCCGTGGGGTAATAAATGGTCTCTGCACACCTGCA	RefSeq	chr16	-	88677681	88686474
CUST_140705_PI430048170	0.000471938	0.324046	6.96698	6.95776	6.9976	P	P	P	8.50713	8.61599	8.67188	P	P	P	CUST_140705_PI430048170	0	Coding	ACCTCAGCTTTTTCCCTCACTTGCATCAATAAAGCTTCTGTGTTTGGAACAGCTAAAAAA	RefSeq	chr9	+	114323022	114326479
CUST_74481_PI430048170	0.0487701	2.78082	9.89877	9.89907	8.87799	P	P	P	8.08034	8.08469	8.29319	P	P	P	CUST_74481_PI430048170	0	Coding	AGATGAATCATTGATTGAATAGTTATAAAGATGTTATAGTAAATTTATTTTATTTTAGAT	RefSeq	chr4	+	73740505	73743716
CUST_131525_PI430048170	0.000824541	2.5922	11.1886	11.2631	11.3038	P	P	P	9.90436	9.7283	9.99054	P	P	P	CUST_131525_PI430048170	0	Coding	AATATTTAACATAATTAAAGATGGACCCATAAGAGTGACGCCTGTGGAGCGCGTGCTCTT	RefSeq	chr10	-	124007665	124093607
CUST_126951_PI430048170	0.000516031	3.86211	10.448	10.5836	10.6752	P	P	P	8.64355	8.58415	8.63912	P	P	P	CUST_126951_PI430048170	0	Coding	GAGCTGGCTGCTGAGGTGACCACAGCCTTCTCCTAATAAAGCTGTAAGTATTTAAAACCT	RefSeq	chr11	+	130448973	130476644
CUST_127186_PI430048170	0.000918799	3.7613	10.4667	10.0808	10.4555	P	P	P	8.46195	8.3053	8.52565	P	P	P	CUST_127186_PI430048170	0	Coding	CCACAGCTCCTATAGGCATTTTAGAGATCTTGGATTTTTATGTACAGTCTTAGTCATTTT	RefSeq	chr3	-	27715948	27722715
CUST_109256_PI430048170	0.00749771	0.472125	5.46785	5.01691	5.3119	P	P	P	6.44386	6.36471	6.26664	P	P	P	CUST_109256_PI430048170	0	Coding	AACTTCCGCTTCCTGTCACTTTTCTTCAAGAGCAAGGATGTGATGATTTTCAACGGCCTG	RefSeq	chr10	-	103446785	103452405
CUST_91166_PI430048170	0.0106592	23.7759	7.58411	7.56004	7.57801	P	P	P	2.57471	2.12251	3.7795	A	A	A	CUST_91166_PI430048170	0	Coding	AGCAATAATTACCTGACCAAGGAGGAGTGCCTCAAGAAATGTGCCACTGTCACAGAGAAT	RefSeq	chr19	+	38264457	38292614
CUST_134906_PI430048170	0.0402082	2.5419	4.91842	5.08988	5.37485	P	P	P	3.66805	3.14115	4.32811	A	A	A	CUST_134906_PI430048170	0	Coding	GGAATGAATACTTCAGATGCTTTCAGGAGTGACACAAGAACACAATGATTTTTGCTTATA	RefSeq	chrX	+	11293412	11300761
CUST_143873_PI430048170	0.00867218	6.57914	4.31165	5.21827	4.66273	P	P	P	1.99769	2.06321	2.12227	A	A	A	CUST_143873_PI430048170	0	Coding	AATACTTTGTTTTGGTACATTTGGTTGTGCTTGTGGGGAAAATAAAAACGCAGAGATCCT	RefSeq	chr6	+	98834703	98838790
CUST_131828_PI430048170	0.00143984	0.451317	6.1009	6.43538	6.11946	P	P	P	7.21537	7.50239	7.39199	P	P	P	CUST_131828_PI430048170	0	Coding	CAGTCTGACAAAAGTCTATGGTTCCTAAATATGACATCAGTGTTGCCAATAAAATGTTTC	RefSeq	chr7	+	95772505	96098424
CUST_131778_PI430048170	0.0012522	2.35118	11.5313	11.4522	11.8009	P	P	P	10.3935	10.2348	10.4696	P	P	P	CUST_131778_PI430048170	0	Coding	TTCTTTTCACCATGCAAATAACATGCCCAGCAAAAACTTGCTTTATGGGTCTGCCTGGAG	RefSeq	chr20	-	51003655	51023138
CUST_135593_PI430048170	6.09293e-06	0.292276	6.89081	6.75313	6.84707	P	P	P	8.57492	8.56553	8.6752	P	P	P	CUST_135593_PI430048170	0	Coding	CCTCCTTGTGTAAGACAGTAACTTTACACTTCAGACAGATTTTCTGTGTTATGAAATGTT	RefSeq	chr6	+	12012490	12164999
CUST_133712_PI430048170	0.000407083	0.436381	7.82643	7.62765	7.83618	P	P	P	8.84169	8.91973	9.11357	P	P	P	CUST_133712_PI430048170	0	Coding	CCTGGTTCCTTCGCTTGTGTTTCTGTACTTACCAAAAATCTACCATTTCAATAAATTTTG	RefSeq	chr12	-	122701292	122703357
CUST_145610_PI430048170	0.00200955	0.391614	8.77636	8.68457	8.48898	P	P	P	9.97982	10.0585	9.98243	P	P	P	CUST_145610_PI430048170	0	Coding	CCAGATGTGAAAGAAGCTGCCTGTTTACTGATCCATTGAATAAACCCATTTTAATAGAAA	RefSeq	chr1	+	239629072	239909417
CUST_128407_PI430048170	0.000406275	0.456782	7.19868	7.30736	7.11374	P	P	P	8.28636	8.38334	8.34624	P	P	P	CUST_128407_PI430048170	0	Coding	GCCCTCCTGAAACTTACACACAAAACGTTAAGTGATGAACATTAAATAGCAAAGAAAGAA	RefSeq	chr17	+	49495292	49515020
CUST_127454_PI430048170	0.00434938	0.282834	3.62919	3.26216	3.86456	A	A	A	5.47474	5.29647	5.50466	P	P	P	CUST_127454_PI430048170	0	Coding	GGTAGACAGTATATAACTAACAACCAAAGACTACATATTGTCACTGACACACACGTTATA	RefSeq	chr4	-	76001341	76007523
CUST_143131_PI430048170	6.33743e-05	4.22401	9.04344	8.95545	8.82227	P	P	P	6.8412	6.72481	7.01317	P	P	P	CUST_143131_PI430048170	0	Coding	GCAAGAGAATTCAACCTCAAGAAACCCTTGAATTAGGACATCCCATATAGACAGATTTTT	RefSeq	chr12	-	27081056	27082522
CUST_134246_PI430048170	0.0471344	2.63744	8.33965	8.61466	7.60284	P	P	P	6.83061	6.84387	6.86381	P	P	P	CUST_134246_PI430048170	0	Coding	TGTGGAATAGCTCAAAATGTCCATTCTGTTTTAAGTAACAGAATTGATAACTGAGCAAGG	RefSeq	chr13	+	25096137	25098566
CUST_142779_PI430048170	0.00327435	2.59438	10.3785	9.84987	10.1721	P	P	P	8.60555	8.59631	9.06864	P	P	P	CUST_142779_PI430048170	0	Coding	AGGGGTGCAGCAAGTGCTTTCTATGCGTTTCTTCATTAAAACATTAGGCTAATACAGGCA	RefSeq	chr1	+	201190824	201228952
CUST_90487_PI430048170	0.000128876	0.385491	11.4315	11.2319	11.4227	P	P	P	12.8024	12.6464	12.7671	P	P	P	CUST_90487_PI430048170	0	Coding	AATGTGGAGCTCAAATATGCCTTATTTTGCACAAAAGACTGCCAAGGACATGACCAGCAG	RefSeq	chr7	-	45912244	45921272
CUST_141473_PI430048170	5.04906e-05	2.28424	7.91098	7.95109	7.81108	P	P	P	6.71325	6.64518	6.74146	P	P	P	CUST_141473_PI430048170	0	Coding	CCAAAGGTTGAAGTTCTGCTGTTTTGTTATAATGCCTGATACACATCTTGAATAAAGTCT	RefSeq	chr2	-	86213996	86337654
CUST_132899_PI430048170	8.17973e-05	2.19901	9.05844	9.02355	9.19007	P	P	P	7.97877	8.01689	7.86707	P	P	P	CUST_132899_PI430048170	0	Coding	TATTCTCCTGGTTACTTTCCCCCTTAGAGTTCCAGATGTACATGGTATATTTTGAAGTAG	RefSeq	chr2	+	28981297	29052230
CUST_104076_PI430048170	0.000587673	2.7082	8.13012	8.26511	8.14376	P	P	P	6.62956	6.90123	6.68559	P	P	P	CUST_104076_PI430048170	0	Coding	TAAGCCAACACCAGTTCTATCTGGACAGAAAGCAGAGTAAGTCCAAAATCCATGCAGCAC	RefSeq	chr10	-	13643705	14330867
CUST_55421_PI430048170	0.00788564	2.2709	7.99195	7.61144	8.15336	P	P	P	6.56688	6.53922	7.08516	P	P	P	CUST_55421_PI430048170	0	Coding	AGTCAAGAAAATGAGATGTTTTCCATCAGAGACAGTGCACACAGGCGGTTTCTGCTATTC	RefSeq	chr1	+	206897442	206904139
CUST_131016_PI430048170	0.000963117	0.467133	4.41896	4.37214	4.1416	P	P	A	5.31381	5.59139	5.31896	P	P	P	CUST_131016_PI430048170	0	Coding	TTTTGTTACTGTAATTCTGTTCACTAGAATAAAATGCAGAGCCACACCTGGTGAGGGCAC	RefSeq	chr12	-	7470815	7503818
CUST_128697_PI430048170	0.00478113	3.21514	6.07675	5.86799	6.01418	P	P	P	4.56184	3.98204	4.31038	P	A	A	CUST_128697_PI430048170	0	Coding	CACTCCTTTCTGACCAAGCAACGCTAACTTTTGTACAGATCGATTTGATAAAATTAAACA	RefSeq	chr16	+	981807	986979
CUST_63999_PI430048170	0.00680492	2.63137	9.19007	8.943	9.16879	P	P	P	7.35713	7.75024	7.957	P	P	P	CUST_63999_PI430048170	0	Coding	GTTGGTTCCTTTTTCTTATTGGTTGAAAATTACCTGGTAGTGATCAGAAAACTTAGATGC	RefSeq	chr18	+	58044377	58401540
CUST_131366_PI430048170	0.000809525	0.452053	9.68497	9.97477	9.73263	P	P	P	11.0021	11.0581	10.7696	P	P	P	CUST_131366_PI430048170	0	Coding	GGAGATAATTCCTACGGGGAATTCTTAAAACTGTGCTCAACTATTAAAATGAATGAGCTT	RefSeq	chrX	+	37780016	37813461

## Sheet: lncRNA
ProbeName	pvalues	foldchange	M2_1_NS	M2_2_NS	M2_3_NS	M2_1_flags	M2_2_flags	M2_3_flags	M0_1_NS	M0_2_NS	M0_3_NS	M0_1_flags	M0_2_flags	M0_3_flags	ProbeName.1	ControlType	Type	ProbeSeq	Source	chr	strand	start	end
CUST_125404_PI430048170	0.0175666	6.06894	8.72441	8.42423	8.4972	P	P	P	5.2259	6.59936	5.68506	P	P	P	CUST_125404_PI430048170	0	Noncoding	GCAGAACACGACTTAAAAGTGGCTTCAGAGGAAAAGCAAGAAAGGCTTGAAAGATGTGAA	NONCODE	chr8	+	43251710	43251858
CUST_126571_PI430048170	0.018587	2.23252	6.71943	6.96158	6.37572	P	P	P	5.48468	5.55786	5.59516	P	P	P	CUST_126571_PI430048170	0	Noncoding	ACTGGGCCAAATCTACATGGTCTGTTTGTGCAGAAGACAGGTCAAGCTGTTGAATTTTTT	NONCODE	chr12	+	87746566	87746683
CUST_107902_PI430048170	0.0112739	2.32589	8.80166	8.8888	8.24657	P	P	P	7.19374	7.58509	7.55323	P	P	P	CUST_107902_PI430048170	0	Noncoding	GGTGATTCTGATATCATTAGAGGCATGCCAAACAGATTGGTGAAAAGTAAATGATGCAAA	lncipedia	chr12	-	14356841	14357151
CUST_106314_PI430048170	0.0118698	0.487562	5.43007	5.66891	5.04553	P	P	P	6.16653	6.59246	6.52639	P	P	P	CUST_106314_PI430048170	0	Noncoding	TTTGGGAGGACGTTCCTTGTATTTCCATTTGCAAAGAGAAATAAATAATTGTCAGAGTTC	lncipedia	chr4	-	39028374	39032720
CUST_108818_PI430048170	0.0171164	2.1533	12.5943	12.5281	12.0764	P	P	P	11.3591	11.2316	11.3381	P	P	P	CUST_108818_PI430048170	0	Noncoding	AGAGTGACTTTATGGCTGTCCACCACCTTACCACACATTTGAAGAGCCAACCTACATTAA	lncipedia	chr9	+	5096665	5098193
CUST_60987_PI430048170	0.0244538	2.72987	7.50281	6.70635	6.48804	P	P	P	5.07094	5.66438	5.7346	P	P	P	CUST_60987_PI430048170	0	Noncoding	GGGGTAAATTATTTCACTTTGAGCTTCCTAGTTAACCAAAGAAGTCAAGGCAAAAAAGAA	lncipedia	chr14	-	59672667	59675172
CUST_69598_PI430048170	0.00267517	2.30225	9.18132	9.25551	8.95918	P	P	P	7.98655	7.88276	7.93191	P	P	P	CUST_69598_PI430048170	0	Noncoding	GAAATGCTGCAGCTATACCCAGACCTTTTATAGGCCATTTCCAGCAGTTTAAAAGGTTTC	lncipedia	chr14	+	49600411	49607509
CUST_100211_PI430048170	0.0109268	5.14656	5.02857	4.95776	4.71663	P	P	P	3.09678	2.12707	2.19093	A	A	A	CUST_100211_PI430048170	0	Noncoding	TACAGAGTGGGTTGGCATTTCATGGCACATAATTATTATTCCTCATTTCTGCGTTACTAA	lncipedia	chr18	-	63642896	63644255
CUST_97764_PI430048170	0.0136659	2.8873	4.82665	5.3793	4.59766	P	P	P	3.59082	3.27475	3.4466	A	A	A	CUST_97764_PI430048170	0	Noncoding	AGACCCTAAGTGGAATAAAATGTCAGTAGCAGTCTAGGAGCATATATTTATTGGAATAGA	RefSeq	chr8	-	129216466	129241240
CUST_60955_PI430048170	0.00462509	8.49639	6.04547	6.42819	6.33065	P	P	P	3.64198	3.15865	2.57735	A	A	A	CUST_60955_PI430048170	0	Noncoding	TCCTTTTGAATCATAAGCACTTTTGTTAAATACCTCAAATCTTTCGAGAACAGCAAGGAG	RefSeq	chr14	-	55781134	55796674
CUST_69679_PI430048170	0.0312951	2.38598	8.14645	8.3393	7.483	P	P	P	6.93029	6.77687	6.6126	P	P	P	CUST_69679_PI430048170	0	Noncoding	GATCCTTGAACAGAAAGCCAATTCTTGCCAAGTGGGAAAGGGAAAGGGAAAATATAAGGA	lncipedia	chr11	-	93052394	93052827
CUST_121748_PI430048170	2.09975e-05	4.28232	8.52614	8.7534	8.64571	P	P	P	6.4677	6.51259	6.65225	P	P	P	CUST_121748_PI430048170	0	Noncoding	ATAACGCTGTTATTGACGAGATCACACCCAAGCTGATCAGAGATCTGCCCAATTCTTGCA	NONCODE	chr2	-	129990455	130028412
CUST_118757_PI430048170	0.010811	2.30488	12.8837	12.8341	12.3891	P	P	P	11.6132	11.4824	11.4411	P	P	P	CUST_118757_PI430048170	0	Noncoding	AAAGCGCAGCAAAACAATGTGGAACGCAACGTTGAAACTTTTTCTGGTGTCTACATGAAG	RefSeq	chr1	+	240007523	240013260
CUST_125670_PI430048170	0.00113761	44.4798	9.12109	8.79693	9.10047	P	P	P	3.57667	2.92278	3.93968	A	A	A	CUST_125670_PI430048170	0	Noncoding	TTCATTGATGCACTTGTGCTGAGCAAGCTTATCTGATCTCCTGGGATCTCTACTAGGATG	ENSEMBL_GENCODE	chr9	+	33603340	33605293
CUST_76403_PI430048170	0.0136262	2.84663	4.62788	5.04995	5.55675	P	P	P	3.9337	3.56967	3.27853	A	A	A	CUST_76403_PI430048170	0	Noncoding	GCTGCTGGCAAAAACCCAGTGTGAGGACCTCCTCATGGAATACCTGTAAAGTATTCTTTA	lncipedia	chr5	+	180823101	180823965
CUST_111088_PI430048170	0.0279604	2.81991	10.1612	10.1256	9.34165	P	P	P	8.48794	8.47363	8.31196	P	P	P	CUST_111088_PI430048170	0	Noncoding	GGTTTAGCCTTACTAGTTACAGTCTCCAACACCTTTGGCCTAGATTATGTACAAACCTAA	lncipedia	chr3	-	106895728	106896408
CUST_80712_PI430048170	0.000375001	4.83139	8.07726	7.81278	7.85273	P	P	P	5.37786	5.81699	5.70952	P	A	P	CUST_80712_PI430048170	0	Noncoding	TTTGCTATGTTGAGCACTTGCTCCCGTCTACTTTCTTTTGTAGAATCCACTGCACCAAGG	lncipedia	chr9	-	38543252	38577156
CUST_54165_PI430048170	0.0114779	2.49056	10.4784	10.4812	9.8652	P	P	P	9.13784	9.01236	8.78623	P	P	P	CUST_54165_PI430048170	0	Noncoding	TAACCATACTCTATTCTACAACCCTCCATGAACCTGCTTCCAATTGGCTATTATGATGAA	lncipedia	chr1	-	71367053	71367303
CUST_123663_PI430048170	0.000605172	0.23036	2.53854	3.01422	3.01942	A	A	A	5.06341	5.15711	4.721	P	P	P	CUST_123663_PI430048170	0	Noncoding	ATATTCTGGATTTTCTCCATCAGTCTAGGACTGAAGACACCGATCTCTGGTGTCGGTTGA	NONCODE	chr5	-	160486768	160486929
CUST_53678_PI430048170	0.0381202	4.61498	7.79606	8.12212	6.72643	P	P	P	5.46875	5.45895	5.43314	P	P	P	CUST_53678_PI430048170	0	Noncoding	ACAATCCATCCAAGTTTTACTCAGTGAATGTGGATTATAGCAAACTGAAGAAAGAAGGTC	lncipedia	chr1	+	28109738	28110298
CUST_124780_PI430048170	0.000106702	0.47516	12.5184	12.51	12.3618	P	P	P	13.6323	13.4834	13.4957	P	P	P	CUST_124780_PI430048170	0	Noncoding	ATCATGACCATTCTGCTCACCATCATCATCCTAGTGTTGATCTTCCAAGTCTGTCGATAG	NONCODE	chr6_GL000256v2_alt	-	1056955	1057375
CUST_63728_PI430048170	0.00198349	2.08498	11.2824	11.076	11.2868	P	P	P	10.1955	10.1147	10.1636	P	P	P	CUST_63728_PI430048170	0	Noncoding	AGAACTTCAAGGTCTTTGACTTTGAACTGAGCAGCCAGGATATGACCTCCTTACTCAGCT	lncipedia	chr18	+	8545634	8546817
CUST_29906_PI430048170	0.00253516	3.74002	5.37356	4.82923	5.18784	P	P	P	2.79591	3.38166	3.46785	A	A	A	CUST_29906_PI430048170	0	Noncoding	AGAAAATCATGACGTTACATGTCTATACAAGATTTAGAAAGCTCCAGACGAGACTAGTAG	ENSEMBL_GENCODE	chr17	-	3601761	3602272
CUST_5134_PI430048170	6.47636e-09	0.462473	12.6587	12.6456	12.6454	P	P	P	13.7582	13.7716	13.7575	P	P	P	CUST_5134_PI430048170	0	Noncoding	ATTCACCTACTCCCTGAAGTCTAGGGACAGGAAGATGGTTGGAGACCTGACTGGGGCCCA	RefSeq	chr6_GL000251v2_alt	-	1234649	1234992
CUST_61272_PI430048170	1.59012e-05	0.340571	9.93372	9.94876	9.80818	P	P	P	11.5391	11.4146	11.3988	P	P	P	CUST_61272_PI430048170	0	Noncoding	ATTGCTACAGTTGTGATTGGAGGAGGTGAGTCTTGTGGCTGTGCCCATGGTGCTCAGTGC	lncipedia	chr14	+	94110737	94115839
CUST_69780_PI430048170	0.0381389	3.05922	9.20743	9.39047	8.31405	P	P	P	7.49996	7.49267	7.28115	P	P	P	CUST_69780_PI430048170	0	Noncoding	ACTGCTAACAGCAAAAGGGGTTATGAATTACGTTACTTCCAAATTAACCAGAACAAACAA	lncipedia	chr1	-	185171334	185171710
CUST_92271_PI430048170	0.0293312	3.30951	11.8058	11.7352	10.8489	P	P	P	9.76015	9.90059	9.7248	P	P	P	CUST_92271_PI430048170	0	Noncoding	ATGGACTTCATGTTATTATTGGATCAACAATTCTCACCATCTGCCTTCTCTGCCAATTAA	lncipedia	chr9	-	82427349	82428025
CUST_58678_PI430048170	0.0280752	2.34141	9.80725	9.91166	9.22234	P	P	P	8.45344	8.50595	8.38822	P	P	P	CUST_58678_PI430048170	0	Noncoding	CTTCCAGAATATGGAGGCACCAAAGTAGATGACAAGGATTAGTTCTCATTTAGAGATGGT	lncipedia	chr12	+	10770304	10770605
CUST_5399_PI430048170	0.00102905	2.1273	6.25648	6.50347	6.54433	P	P	P	5.21767	5.51997	5.29886	P	P	P	CUST_5399_PI430048170	0	Noncoding	TTTATTTCTCTGTGGCACTCACTGCTTCTGGAGGGGAGACTGTTAATAAAAGATTTGGGA	RefSeq	chr19	+	11296138	11315969
CUST_44570_PI430048170	0.0197843	0.373406	4.96487	5.61537	5.78553	P	P	P	6.749	6.97513	7.01422	P	P	P	CUST_44570_PI430048170	0	Noncoding	ACTGAGGTGCTGCTACCACAAACATGAGGAAACTTCTGTTAGGAGTTCAACCTTCAGAGA	lncipedia	chr6	+	14661329	14665134
CUST_98131_PI430048170	0.0114506	2.36401	6.30653	6.4817	5.78654	P	P	P	4.80948	5.24345	4.84354	P	P	P	CUST_98131_PI430048170	0	Noncoding	CTGAGATTCCAGAATCCCCAGTTATACCTGAAATTGCACTGGAACTTCCTAGATTGTTAA	lncipedia	chr12	-	117245550	117246164
CUST_70578_PI430048170	0.00913901	2.16764	6.77486	6.7161	6.69267	P	P	P	5.5747	5.40764	5.82357	P	P	P	CUST_70578_PI430048170	0	Noncoding	GAGCGTGGAGAAATTTGGAAACACCTATTTCTTAACTCAAATAAAGTCCAGTTTGTACCT	lncipedia	chr2	+	219461239	219466861
CUST_4427_PI430048170	0.000298311	4.03313	5.87156	5.95893	5.92867	P	P	P	3.77956	4.01127	3.92455	A	A	A	CUST_4427_PI430048170	0	Noncoding	CCATTATAACAAAAGAGTAGCCAAAATGCTGTGGCATTCTTAGAAATGAAGAAAGAACTG	RefSeq	chr6	-	167994186	167997077
CUST_84920_PI430048170	0.0317033	3.22462	4.79917	5.01287	5.7193	P	P	P	4.13926	2.68782	3.44889	A	A	A	CUST_84920_PI430048170	0	Noncoding	TTTATGACTGGGTTTAGATAACTGGGCTTCTGCTACATACCTCTGTTCCAGTGTCTGGGT	lncipedia	chr3	+	171875969	171876249
CUST_33034_PI430048170	0.00452982	0.353969	4.94776	4.41446	4.75446	P	A	P	6.09396	6.24254	6.31587	P	P	P	CUST_33034_PI430048170	0	Noncoding	CTGAAATGAAGCAGATTCACTCAATCCGCACAAACTCTCAGAAAAGTGCATCTGGAAAAA	ENSEMBL_GENCODE	chr20	+	7069614	7146656
CUST_53982_PI430048170	0.0143138	2.70145	5.93391	6.17959	5.4762	P	P	P	4.61357	4.73823	3.88448	P	P	A	CUST_53982_PI430048170	0	Noncoding	CTCTTTGGACCACAGTTGAAAAATGAAACCAGCTGGTATCTCAGGCATCATTGGCCTTGA	lncipedia	chr1	+	47550195	47550753
CUST_75402_PI430048170	0.00341978	2.37933	9.77713	9.71468	9.62959	P	P	P	8.33957	8.33643	8.67124	P	P	P	CUST_75402_PI430048170	0	Noncoding	CCAGTCTGCTCAATATTGAATGATCTGTAACAACCCTGTAAGAACAGAACAGTATTTTCC	lncipedia	chr5	-	39387696	39388857
CUST_114253_PI430048170	0.0236677	2.18032	9.40775	9.84224	9.03827	P	P	P	8.5777	8.27274	8.14123	P	P	P	CUST_114253_PI430048170	0	Noncoding	CATGGACCACAAAGAATCAGGATGAAAACACACAGGAGGGAAGATCCTGGGAATTTTTTC	lncipedia	chr6	+	121381471	121381860
CUST_91760_PI430048170	0.00218483	2.03197	5.91818	5.92641	5.59824	P	P	P	4.95937	4.63805	4.78243	P	P	A	CUST_91760_PI430048170	0	Noncoding	AATGATGATACATTTAAATGACTTGGATGTTTTATAGGTTGGCACTCATCATGAGCCCCT	lncipedia	chr16	-	21425054	21448567
CUST_62131_PI430048170	2.52115e-05	2.1481	7.13421	7.11516	7.02193	P	P	P	6.0235	5.93558	6.00405	P	P	P	CUST_62131_PI430048170	0	Noncoding	AAAGAAGGTGGGATTTGATTCCTGGCTGCAAATCTTCACTCTGTCACCTGCTATCTGTGT	RefSeq	chr15	+	72782834	72798199
CUST_125858_PI430048170	0.00072408	0.479179	5.42396	5.22262	5.34066	P	P	P	6.38182	6.53157	6.25135	P	P	P	CUST_125858_PI430048170	0	Noncoding	AGAAGATGAAGATGACCCTGAGCTTGTCATGTTCACTGTTAATTGTTCTACTAACACCCT	RefSeq	chr9	-	130577349	130579494
CUST_117863_PI430048170	0.000927095	0.440018	4.06027	3.9337	3.7495	A	A	A	5.04338	5.04969	5.21374	P	P	P	CUST_117863_PI430048170	0	Noncoding	TGTTGTGGTTATTCATCCAGCATGTGTTGAGGAAGAAAAGTCAGAAGACCAGGACCTCCA	lncipedia	chrX	-	154032433	154040103
CUST_19138_PI430048170	0.0243968	2.14905	6.87545	6.96176	7.57726	P	P	P	6.23542	6.0721	5.87972	P	P	P	CUST_19138_PI430048170	0	Noncoding	CCAAACATTCCTCACATGCTCCTCCACAATGCTAGTTAATGCAGCAAGAATAGTCTTATA	RefSeq	chr6	+	137665645	137674554
CUST_102682_PI430048170	0.0106669	2.57063	6.48263	7.20366	6.98342	P	P	P	5.78399	5.42525	5.43578	P	P	P	CUST_102682_PI430048170	0	Noncoding	AAACAGAAAATTTTGGGGTGCCATCTATGTCTCTGTAACAGGAACAGTTCAGCAGGCTGA	lncipedia	chr1	+	234284971	234285541
CUST_97981_PI430048170	0.000136398	0.200303	2.94914	2.99994	2.71573	A	A	A	5.35625	5.27666	4.98016	P	P	P	CUST_97981_PI430048170	0	Noncoding	GAATTATGTTGTTGTGAACCTAAAGCTGCTCCAGGAAAGTCTATCGAAAAGTTAAAAACA	lncipedia	chr10	+	29947615	29951683
CUST_107543_PI430048170	9.96105e-07	0.312553	8.86388	8.91253	8.8305	P	P	P	10.5061	10.5895	10.5448	P	P	P	CUST_107543_PI430048170	0	Noncoding	AACACATCCAAGCTTAAGACGGTGAGGTCAGCTTCACATTCTCAGGAACTCTCCTTCTTT	lncipedia	chr14	+	94110735	94112194
CUST_70711_PI430048170	0.0212248	3.28358	6.4203	6.52462	5.45291	P	P	P	4.84973	4.32477	4.21625	A	A	A	CUST_70711_PI430048170	0	Noncoding	AGATGACAAGGATTATTTCTTATTTAGAGACGATGGTGCATTCTTGGGAAGTATGTAGAC	lncipedia	chr2	-	234455156	234455783
CUST_103773_PI430048170	0.0200084	2.97117	7.48389	7.62266	7.4639	P	P	P	5.53188	6.38444	5.81228	P	P	P	CUST_103773_PI430048170	0	Noncoding	GTGGAGGAATAGTAAGAAAATTCTTAGTGCTGGCTTAGCTTCATTGATCCAAAAACATAA	lncipedia	chr2	+	130681227	130691691
CUST_92054_PI430048170	0.00144773	2.08731	6.72585	6.43729	6.59364	P	P	P	5.36593	5.48804	5.71087	P	P	P	CUST_92054_PI430048170	0	Noncoding	TATAATACTGTTCTACTTATGACAAGATCCTTCAGGAAGAAGACCCTGGCGAAAATTACC	lncipedia	chr10	-	62793940	62795572
CUST_69777_PI430048170	0.0418938	2.79	9.04908	9.25262	8.22825	P	P	P	7.3246	7.51023	7.43775	P	P	P	CUST_69777_PI430048170	0	Noncoding	ATCCCTGAACAGAAAGCCAAATCTCACCAGGCAGGAAAGGAAAAGGGCAAATACAAGGAA	lncipedia	chr1	+	173351688	173352004
CUST_98654_PI430048170	0.0124126	2.05155	7.99847	7.98495	7.54646	P	P	P	6.88226	6.86401	6.71161	P	P	P	CUST_98654_PI430048170	0	Noncoding	CAAAGAGAAAGAGAAGAGGCACTGATATATGTTCTCCAGGCCTTTTAGAGAACATGGAAT	lncipedia	chr3	+	66637148	66637412
CUST_118451_PI430048170	0.00394042	3.25033	5.61912	5.50232	5.67391	P	P	P	4.17065	3.66558	3.81511	A	A	A	CUST_118451_PI430048170	0	Noncoding	CCCTATTGAAAAAGAAATGGGAAAGGGGTGGATGTGTCAATAAACACAACATTGAAGGCA	RefSeq	chr1	+	111739840	111747798
CUST_58736_PI430048170	0.000959848	2.28055	11.8302	11.9165	11.862	P	P	P	10.5575	10.6972	10.7787	P	P	P	CUST_58736_PI430048170	0	Noncoding	GTAACATTCACACAACACCTCACTTTTGAATCTATAAAAGAATTGCACGTATGAGAAACC	RefSeq	chr12	+	16347777	16364410
CUST_56789_PI430048170	0.015964	2.04507	6.90442	7.03886	6.52074	P	P	P	5.89523	5.73828	5.77808	P	P	P	CUST_56789_PI430048170	0	Noncoding	AAATGACATTACTGAAAAGCAGGAAGCCCAGGCACACAAAGAGAACCAGTGATGTGAAGA	lncipedia	chr10	-	102085475	102085730
CUST_112075_PI430048170	0.00244557	2.43748	6.21541	6.18445	6.28313	P	P	P	5.10175	4.91928	4.79052	P	P	P	CUST_112075_PI430048170	0	Noncoding	CCCCTGGGACCATTTCTTGTGTACTGCAATATGACAGATATTAGAAATGAACACTGCTTG	lncipedia	-	-	-	-
CUST_109157_PI430048170	0.00386484	2.54358	6.22548	5.89699	5.95485	P	P	P	4.34678	4.84971	4.80991	P	P	A	CUST_109157_PI430048170	0	Noncoding	ATCCAATCATAGCCAGGAGAAATTTAAAGGACCAGAGAGAGGACAGACATCCTTCCTGGA	lncipedia	chr10	-	13692168	13707757
CUST_120410_PI430048170	0.00116798	0.345083	5.67699	5.554	5.28428	P	P	P	6.94876	7.16503	7.02552	P	P	P	CUST_120410_PI430048170	0	Noncoding	TGCAAGATGGTTGAAAGTCCTGGGTAAACCTTAACCATGATAATAAAAATGTGGTAAGTT	RefSeq	chr15	+	35546194	35859001
CUST_70607_PI430048170	3.39506e-05	3.28309	15.207	15.2226	15.2721	P	P	P	13.4505	13.5221	13.5817	P	P	P	CUST_70607_PI430048170	0	Noncoding	AAAGTCTTGATAGCAAGCGTTATTTTGGTGGTAGAAACGGTGAAATCTCTAGCCTCTTTG	lncipedia	chr2	-	223975152	223982780
CUST_54628_PI430048170	0.0163636	3.20789	11.6342	11.6157	10.9135	P	P	P	9.81158	9.63648	9.77464	P	P	P	CUST_54628_PI430048170	0	Noncoding	TGTGAGCCCAGGGATTTATTTTCCTTTTTACAGTAGGAGGCCTAACTGGCATTGTATTGG	lncipedia	chr1_KI270706v1_random	-	126047	127098
CUST_65775_PI430048170	0.00935996	2.83564	7.20184	7.24702	6.52419	P	P	P	5.75927	5.25179	5.51349	P	P	P	CUST_65775_PI430048170	0	Noncoding	TCATCTTCCTCTTCACTGTGGGTAGTCTAACCGGCATTGTACTAGCAAACTCATCATTAG	lncipedia	chr2	-	50588689	50589415
CUST_75154_PI430048170	0.000190765	3.32016	9.71769	9.533	9.80804	P	P	P	7.89193	7.92577	8.05553	P	P	P	CUST_75154_PI430048170	0	Noncoding	ACCACCTGTAGGGACAGACCTTGGGTGTGAGCCTCAGGCGCGTTTAAAATGAGGGAAGCA	RefSeq	chr5	+	473235	480891
CUST_101590_PI430048170	0.00680527	2.18975	10.4634	10.4144	10.0314	P	P	P	9.28044	9.07803	9.18887	P	P	P	CUST_101590_PI430048170	0	Noncoding	ATCTATTGTGAATGCGCTGGTTGGCTGGGTTCAGTAATAAATATGTGAGACCTTTCATTT	lncipedia	chr21	-	17500476	17512529
CUST_121101_PI430048170	5.21489e-05	0.485688	8.84475	8.91693	8.98534	P	P	P	9.95414	10.016	9.90377	P	P	P	CUST_121101_PI430048170	0	Noncoding	AAATGCAAAGTGCAAGTGCACCTTTTGCAAGAGCTGCAGCTCCTGCTGCCCTGTAGGCTG	NONCODE	chr18	+	68527969	68528123
CUST_56824_PI430048170	0.0104667	2.12912	6.47529	6.62567	6.06597	P	P	P	5.44465	5.1461	5.34596	P	P	A	CUST_56824_PI430048170	0	Noncoding	TCTCTAGCAGTGACCACTACTATTACAGCCCATGCTGAGACAAAGCAGCTGAGATAAATG	lncipedia	chr10	+	109534654	109534990
CUST_35879_PI430048170	0.00380151	2.3279	8.16622	8.19998	7.73263	P	P	P	6.99804	6.87328	6.58534	P	P	P	CUST_35879_PI430048170	0	Noncoding	AAGAGTATCTTCTTGCTTTCATGGGACTGCTGCTGCCATGATTGAATGAGGAATACAGGA	ENSEMBL_GENCODE	chr10	-	76835377	76835502
CUST_115115_PI430048170	0.00919037	2.05182	5.5184	5.65756	5.3115	P	P	P	4.26716	4.29949	4.77338	P	P	P	CUST_115115_PI430048170	0	Noncoding	TGGATCACAAGAACTAATCTTTCATGATTTGGAAACCGGAAGGAAAGAAGCACTTTTGTA	RefSeq	chr3	-	40173146	40309698
CUST_82400_PI430048170	6.60277e-05	4.17417	5.10304	5.24946	4.94837	P	P	P	2.94255	3.18778	2.98985	A	A	A	CUST_82400_PI430048170	0	Noncoding	CAGTTCCACAGAGATTCCTAAATTCCCATTTTACCTGAAGCTGCACTAGAACTGCTGATG	lncipedia	chrY	-	21631682	21632015
CUST_68215_PI430048170	0.0153131	4.86805	6.43491	6.28793	6.47976	P	P	P	3.49156	4.58956	4.07318	A	P	A	CUST_68215_PI430048170	0	Noncoding	GAGGGAGGGGCATTTCTAATCACACTGAAATGCAGTGGAAACATTTAGTCTAATAAAATG	lncipedia	chr10	-	20813739	20815825
CUST_27507_PI430048170	0.0078059	2.39044	8.33626	8.30509	8.71047	P	P	P	7.26839	7.18051	7.16516	P	P	P	CUST_27507_PI430048170	0	Noncoding	AGGAAGCTACCCCCAATAAACTGTGCCTGCTCAGAGCCCCAGGTACACCCATTCTTGGGA	ENSEMBL_GENCODE	chr14	-	105599904	105600209
CUST_116508_PI430048170	0.00542554	2.01795	11.7622	11.7945	11.4413	P	P	P	10.7571	10.6087	10.6142	P	P	P	CUST_116508_PI430048170	0	Noncoding	ATCTAGTTAACCTTTTTGAAGGCACAATCCTGTGTGTTATCCATGCCAAAAGTGTGACAA	lncipedia	chr11	-	89498747	89499198
CUST_68704_PI430048170	0.028117	3.44269	8.3189	8.42462	7.34511	P	P	P	6.47589	6.36468	6.09542	P	P	P	CUST_68704_PI430048170	0	Noncoding	CAAGCAACAACAATCATAATAGCTGATAGTAGGATATTTCTGAGTGACCAGACAAAGGAG	lncipedia	chr1	+	23410831	23412146
CUST_116032_PI430048170	0.000846663	0.441445	9.87608	9.90182	9.69314	P	P	P	10.9555	11.0526	11.0092	P	P	P	CUST_116032_PI430048170	0	Noncoding	TATCCAGATTTGCCCCAGGATCCTGCAGCTCCTGAAAGGCAAGCTGGTGGTGGGTCATGA	lncipedia	chr15	+	88647819	88652186
CUST_26682_PI430048170	0.00289005	0.410824	4.91262	5.03529	5.14631	P	P	P	6.53229	6.29651	6.09129	P	P	P	CUST_26682_PI430048170	0	Noncoding	TTCCTGCCTTTCTATCAGCATCAGATGGCTAGCGATGGATGGCTGTAAGATTGATGTAAT	ENSEMBL_GENCODE	chr14	-	22418355	22432739
CUST_99510_PI430048170	0.0473722	2.21113	11.0165	11.1735	10.3574	P	P	P	9.7226	9.75085	9.762	P	P	P	CUST_99510_PI430048170	0	Noncoding	AGATCCACTACCAGAATAAGAAAGCTAATGAGGCTACAGAAACAGGCCGAAAAGAACGTG	lncipedia	chr22	-	30653876	30654814
CUST_82410_PI430048170	0.000731106	3.32365	5.89664	6.07603	5.67221	P	P	P	4.39976	4.10593	3.92954	P	A	A	CUST_82410_PI430048170	0	Noncoding	ATTCAGGAAGGCTCCCTATAGACATGCTTCAATCTAGTGACAAAGTTGAAATTTGAACAG	lncipedia	chrY	-	22580988	22614081
CUST_6144_PI430048170	0.0443418	2.8646	4.58979	5.37247	4.82993	P	P	P	2.56059	4.04062	3.38404	A	A	A	CUST_6144_PI430048170	0	Noncoding	GCTTCAACACTTAATTCTAGATTTCCCAGATGAACTGAAGTGTATTGCTGTATCTTGTAA	RefSeq	chr18	+	14179096	14227050
CUST_65520_PI430048170	0.0212908	7.61796	5.79662	6.51479	6.34078	P	P	P	3.83549	3.54323	2.00219	A	A	A	CUST_65520_PI430048170	0	Noncoding	GAAGTCATCCTGGACATCACTGGTCCCAGTTAATCACTCACTTATCTTTGCCATCCTTGA	ENSEMBL_GENCODE	chr2	-	23018125	23090837
CUST_70737_PI430048170	0.00152217	2.21217	8.57381	8.50021	8.79768	P	P	P	7.27776	7.48965	7.65958	P	P	P	CUST_70737_PI430048170	0	Noncoding	AACATGATTCAGGCGGCTCCTTTTGGATTTTACACTGTCAGGGTGTGTGTGTTTCAGATC	lncipedia	chr2	-	237545443	237551301
CUST_24557_PI430048170	0.00600183	2.01909	7.31694	7.28158	7.36202	P	P	P	6.23927	6.1763	6.48608	P	P	P	CUST_24557_PI430048170	0	Noncoding	GGGAAGCACTTTATATATACTCTTGTATTTGATGATCACAGCCATCCTGTAAAATGAGTA	ENSEMBL_GENCODE	chr11	-	128614340	128615236
CUST_58437_PI430048170	0.000341593	0.181912	2.66452	2.79383	2.53999	A	A	A	4.87877	5.3191	5.15389	P	P	P	CUST_58437_PI430048170	0	Noncoding	ATATATTTAGGTACAATGGAGTTTTCTTTTCCCAAACGGGAAGAACACAGCACACCCGGC	lncipedia	chr11	+	132332243	132335653
CUST_104663_PI430048170	0.0207161	2.16601	14.4207	14.3954	13.8888	P	P	P	13.1408	13.1978	13.0785	P	P	P	CUST_104663_PI430048170	0	Noncoding	CAACAAATTTTGGTTTTCTACTGTTACGTGAGAACATTAGCAACACATCATTGTGTAAGG	lncipedia	chr5	+	15451995	15452553
CUST_58750_PI430048170	0.0397322	2.5193	5.70539	5.86278	4.78316	P	P	P	4.01442	4.60045	3.83998	A	A	A	CUST_58750_PI430048170	0	Noncoding	TATGGACAACTGAGAAGGTGTCAGAACAAGGTTTAATAGAAATCCTTTAAAAAGTAAGCC	lncipedia	chr12	+	19413152	19413461
CUST_59839_PI430048170	0.0112189	6.70114	5.43342	5.50828	5.3983	P	P	P	2.02633	2.91591	2.98438	A	A	A	CUST_59839_PI430048170	0	Noncoding	TAAAATGAAACAATTGCTCAACTGATCTGGGATCTCTACTAAGATGTTGGCAGCCCAGCC	RefSeq	chr13_KI270840v1_alt	-	39749	41749
CUST_108937_PI430048170	0.0141025	2.27765	5.5436	5.05809	5.77407	P	P	P	4.44388	3.90972	4.48143	P	A	A	CUST_108937_PI430048170	0	Noncoding	ATAGGGAAATAACACCAATTCACCGAGACTTATTAAGTATTCTCTTATAGGTAGGTCCCT	lncipedia	chr15	-	37087711	37098109
CUST_105378_PI430048170	0.0440381	2.17297	8.43183	8.60148	7.8194	P	P	P	7.19769	7.2375	7.16911	P	P	P	CUST_105378_PI430048170	0	Noncoding	GCAAAGCCAAGTCTTGACAAGTTGGAAAAGAGACAGGCAAATATAAGGAAGAACTTATTG	lncipedia	chr15	+	94273495	94274005
CUST_90914_PI430048170	0.018669	2.1519	6.51167	6.41825	5.81474	P	P	P	5.43246	5.14355	4.89575	P	P	P	CUST_90914_PI430048170	0	Noncoding	TACCACTACTTGAGGGGTTGTTGACTACCACCTGCTTGGGAAAAGAAGTACCAGCTAAAA	lncipedia	chr19	+	18040392	18041056
CUST_76889_PI430048170	0.000822084	0.402187	5.70227	5.78272	5.44841	P	P	P	6.77825	7.13844	6.95714	P	P	P	CUST_76889_PI430048170	0	Noncoding	TTGAAGAGTTAAGAGACTCTGAATAATTGGCAGGGGAAGCTGGGATGGAGAACAAAGTAG	lncipedia	chr6	+	14661327	14665220
CUST_77415_PI430048170	0.0493654	0.471777	4.35498	3.57969	4.6163	P	A	P	5.57316	4.85347	5.4656	P	P	P	CUST_77415_PI430048170	0	Noncoding	CACTACGTGGACAGAGTTACCATGCATGTGCTTAGGTAAGATAAACTAATATTTAACATA	lncipedia	chr6	-	71401064	71476824
CUST_97329_PI430048170	0.00128114	2.1739	9.42385	9.38571	9.20187	P	P	P	8.24681	8.16527	8.24661	P	P	P	CUST_97329_PI430048170	0	Noncoding	GCTCGCATCACCAAGCTAAAAAAGGCGAAGGCTAAAGAACTTGCGACTAAACTGGGTTAA	lncipedia	chr20	-	4590992	4591300
CUST_115478_PI430048170	0.00892147	2.0316	7.01321	6.9269	6.56206	P	P	P	5.94064	5.78325	5.74127	P	P	P	CUST_115478_PI430048170	0	Noncoding	CTTGCCTTACTAGTTTCAGTCTCCAACATATACAGCCTAGATTATGTACAAAATCTAAGT	lncipedia	chr2	-	143098122	143098417
CUST_62415_PI430048170	0.00581769	5.35583	6.68247	6.97278	6.09757	P	P	P	3.57899	4.76117	4.03102	A	P	A	CUST_62415_PI430048170	0	Noncoding	GTTCTTGTGTAATGAAGTCAATGCTGTCAGGCCAAGAAATGAAATAATTGCTTACCTTAA	RefSeq	chr15	-	90346530	90349447
CUST_54429_PI430048170	0.0284903	2.16953	5.71499	5.516	5.00124	P	P	P	4.51434	3.77324	4.55701	P	A	A	CUST_54429_PI430048170	0	Noncoding	GCAACAGGGAAGGATATTCCCAATGAAATGAACTTCAGTTTTAGATTAACGAATGTCATT	lncipedia	chr1	+	103926566	103927806
CUST_35317_PI430048170	0.00054298	2.06317	11.7902	11.7852	11.5699	P	P	P	10.6322	10.7731	10.6107	P	P	P	CUST_35317_PI430048170	0	Noncoding	CTACACAACACTCCCGCCTCAGCTAGAGCTTTGCTTTACCTTGGTGCAATTTTTGGAAAA	ENSEMBL_GENCODE	chr9	+	33868540	33868665
CUST_59864_PI430048170	0.0456106	2.00992	8.4562	8.39582	7.70129	P	P	P	7.16402	7.10413	7.36521	P	P	P	CUST_59864_PI430048170	0	Noncoding	AAAGACTCTGAATTTCAACCACAAAGTTGGGAGAGATTTTTGCCACAATTCAAACATACA	lncipedia	chr13	-	20070249	20072136
CUST_94386_PI430048170	0.00470248	2.09863	9.08151	9.12084	8.794	P	P	P	7.87178	8.00026	7.93465	P	P	P	CUST_94386_PI430048170	0	Noncoding	ATTATATGACTGGAGTTTAAGATTTGTGGAAGGAGAACTTTCAAAAGCCAGGAAATGTGA	RefSeq	chr16	-	59754140	59755191
CUST_100612_PI430048170	0.000610482	16.8597	6.49656	6.16089	6.47479	P	P	P	2.06673	2.03098	2.72219	A	A	A	CUST_100612_PI430048170	0	Noncoding	TACAAAACCACTCTGGATGTCATGAGGACTTTGAGAAGCTCTTGCAGTTCTTGAAGAGGG	lncipedia	chr9	-	32724143	32735753
CUST_66864_PI430048170	0.0312042	2.18643	10.7039	10.7975	10.133	P	P	P	9.50875	9.41685	9.40614	P	P	P	CUST_66864_PI430048170	0	Noncoding	ATTTCTCTGTAGAAGGTCAGTTGGAATTTAGAGCATTGCTACTCATCCCTCAACGGGCTC	lncipedia	chr2	-	173575109	173576341
CUST_61065_PI430048170	0.00514654	3.55077	5.07137	4.79732	5.02681	P	P	P	3.25318	2.71893	3.37335	A	A	A	CUST_61065_PI430048170	0	Noncoding	TTTCAGGAAAGAGAAAATTATTCCTATCATCGGGGTTTTTGAAGAACATGAAATGACTGG	ENSEMBL_GENCODE	chr14	+	70810330	70815403
CUST_125964_PI430048170	0.0285324	2.59751	10.0908	10.1659	9.43583	P	P	P	8.5587	8.54626	8.56156	P	P	P	CUST_125964_PI430048170	0	Noncoding	GGCTGTCACTCTCATGACATCATAAATGACATCAACAGTGATGCAGTGCAATACCCAGCT	NONCODE	chrX	+	16803232	16803353
CUST_54278_PI430048170	0.00868038	0.425364	4.51436	4.8521	5.10707	P	P	P	5.91774	6.16495	6.13847	P	P	P	CUST_54278_PI430048170	0	Noncoding	GATATACAATTCCAACAGATCACTCTCACTAGCCAATATGAGACACAGTCAGTTTCCCTA	lncipedia	chr1	+	89181497	89181711
CUST_57961_PI430048170	0.0295395	2.85732	10.0989	10.126	9.24363	P	P	P	8.42747	8.44854	8.19666	P	P	P	CUST_57961_PI430048170	0	Noncoding	GTAACCACACTTTATTCCATAACCTTCATGTGAATCGGCCTCCAACTAGCTATGAAAGTG	lncipedia	chr11	+	80957316	80957634
CUST_57899_PI430048170	0.0203556	2.05387	8.90138	8.92816	8.41432	P	P	P	7.7218	7.8032	7.65565	P	P	P	CUST_57899_PI430048170	0	Noncoding	ACATTAAGAAGAAGGCAGAAAGGGCAGACTTGATAGCTTATCTCAAAAAAGCTACTAATG	lncipedia	chr11	+	74482249	74482542
CUST_112132_PI430048170	9.34928e-05	16.6113	8.52968	8.30518	8.46521	P	P	P	4.55096	4.43835	4.12456	P	A	A	CUST_112132_PI430048170	0	Noncoding	TCCCACCATGCAAATATTGAAGCACTAAACGAGGAGGGAAACACTCCACTTTTGTTTGCT	RefSeq	chr9	+	92809610	92838457
CUST_11329_PI430048170	0.000866311	2.53487	9.51787	9.35964	9.36532	P	P	P	7.88263	8.17342	8.14905	P	P	P	CUST_11329_PI430048170	0	Noncoding	CTGACTCCAAAATCCTCTTTCTTTCCTGTTATCCTGCTGAAGTGCCGATTTCAAATGAAG	ENSEMBL_GENCODE	chr1	-	111599865	111608324
CUST_101853_PI430048170	0.00386068	8.83757	8.04071	8.00554	7.94257	P	P	P	5.11467	4.94333	4.41259	P	P	A	CUST_101853_PI430048170	0	Noncoding	AAGAAACCCTCTCTGAGTTCTTGGGCACGTTCATCTTGATTAGCAGGTTTGCATTTGCTT	lncipedia	chr15	+	58138262	58146895
CUST_68070_PI430048170	0.00388433	2.03981	5.70032	5.52655	5.85199	P	P	P	4.89247	4.6349	4.45008	P	P	A	CUST_68070_PI430048170	0	Noncoding	CTGCCCTGAAAGGGGCTGAAATGAAGCCATTAAGACCGAAGTGTACTTTTTAAAACTCCA	ENSEMBL_GENCODE	chr8	+	80541300	80543104
CUST_34529_PI430048170	5.19658e-05	3.01429	6.50941	6.67591	6.62709	P	P	P	4.95271	4.94613	5.13508	P	P	P	CUST_34529_PI430048170	0	Noncoding	GTGCTAAAATGCTAGGTGTTATATTAATAAATATTTTCTCTGCTGTTGCAACCCCTCTCA	ENSEMBL_GENCODE	chr22	+	32836706	32865634
CUST_64572_PI430048170	0.00583666	2.2851	8.7748	8.72314	8.37603	P	P	P	7.40207	7.5315	7.39102	P	P	P	CUST_64572_PI430048170	0	Noncoding	CAGCAAGCTACAACTGCATCATTTCCTGTTTGTTCCAAAATGAATAAAGGTGATTCTTAT	lncipedia	chr19	+	22362588	22362825
CUST_89733_PI430048170	0.0136354	4.48593	6.13769	6.09574	5.33814	P	P	P	4.20548	2.86526	3.83017	A	A	A	CUST_89733_PI430048170	0	Noncoding	AAGAGTTACTTACATGTGCCTATCTGGCATAGAGATCAGGTGAGAGCGTGTGAAAACATC	lncipedia	chr4	-	173633727	173634371
CUST_16905_PI430048170	0.000237662	2.63455	6.18148	6.32127	6.43125	P	P	P	4.8057	4.858	5.07418	A	P	P	CUST_16905_PI430048170	0	Noncoding	ACTTGAAGGACTCCAGGCGCTTCCGCATGGTCCTGTGGAAGATTTCCCGGTCCTGTTTCT	RefSeq	chr5	+	473235	480891
CUST_69488_PI430048170	0.0299633	2.147	9.00126	9.05723	8.37884	P	P	P	7.63132	7.85852	7.72443	P	P	P	CUST_69488_PI430048170	0	Noncoding	ACGAGGAAGTTCATGACCTACCAACTACTTCAGAGGAAACAAATGGGCATCAGTGTCCTT	lncipedia	chr18	+	26098838	26099226
CUST_55454_PI430048170	0.0060347	2.50382	4.43659	5.03056	4.93763	P	P	P	3.50593	3.7032	3.25658	A	A	A	CUST_55454_PI430048170	0	Noncoding	GATTTCTTAATATAGCCATCTCTTGCAGGAGGACTAGACATGCTCATTCTCAACCACATC	lncipedia	chr1	+	209706427	209720796
CUST_97587_PI430048170	0.00629859	3.06738	5.43952	5.20378	5.91518	P	P	P	3.93655	4.11317	3.72455	A	A	A	CUST_97587_PI430048170	0	Noncoding	AGAGCCTAACTCCTTATTCAAGTATTTCCTTGCTCCTGGATGTGGAAAAATTGCTTAAAT	RefSeq	chr6	+	75383185	75458899
CUST_96807_PI430048170	0.00420589	0.446882	4.33751	3.85553	4.09264	A	A	A	5.27711	5.00391	5.49016	P	P	P	CUST_96807_PI430048170	0	Noncoding	TGGAATAGATTATTTACTCACGGCCTTCAGAAGAAATCAATCCTGATGACACAGTGATTT	lncipedia	chr9	+	73452714	73455047
CUST_120780_PI430048170	0.000722151	0.384605	5.66636	5.36323	5.50586	P	P	P	6.95517	6.92545	6.80189	P	P	P	CUST_120780_PI430048170	0	Noncoding	TGTACCTTCAGGAGCTAGACATGAGTGATTTTGAGGAACAGTTCAAGACCAAGTCCCAAG	NONCODE	chr17	+	45243068	45243167
CUST_24318_PI430048170	0.000655298	2.21652	7.23618	7.15154	7.3252	P	P	P	6.11701	6.09921	6.05637	P	P	P	CUST_24318_PI430048170	0	Noncoding	ATATGATGGCTCTCTGCACCAAATTCCTCCAAACTATTATAATATGTATTGTCTGTAGTG	RefSeq	chr11	+	95230185	95234404
CUST_59346_PI430048170	0.000209359	0.472312	7.34547	7.37315	7.5401	P	P	P	8.45244	8.4372	8.61649	P	P	P	CUST_59346_PI430048170	0	Noncoding	AATGAAAGACTTAAGAATACATCTGACCCAGGCAGCCTGGGTTCAACTCTCCATGTGAGA	ENSEMBL_GENCODE	chr12	+	90293318	90300340
CUST_97819_PI430048170	0.00145237	2.92564	5.98662	6.44877	6.384	P	P	P	4.65444	4.59614	4.9405	P	P	P	CUST_97819_PI430048170	0	Noncoding	CTGGATTCCCTTATCATAAAGCATCTTACAGTAACCTCAGAAATGCAGAAGTTACTTGTA	RefSeq	chr4	+	12223450	12251285
CUST_41689_PI430048170	0.00146868	2.12442	6.32552	6.53535	6.56743	P	P	P	5.52251	5.44984	5.18509	P	P	P	CUST_41689_PI430048170	0	Noncoding	TGTTCTCGAGGAACTACTGTCGTCTAGAGAAGGAATAAAGCAAGTCTAGTGTCAAGCAGC	lncipedia	chr3	-	196636528	196639627
CUST_90507_PI430048170	0.0165134	2.53955	12.5678	12.5508	11.9175	P	P	P	10.8899	11.1539	11.0366	P	P	P	CUST_90507_PI430048170	0	Noncoding	TGGTTACCTATGTACACATTACCACTTTCAAAAATCTACAGTCAGTATGGATGAGAACTA	lncipedia	chr8	+	94565035	94565715
CUST_116853_PI430048170	0.0164276	2.43159	4.69841	5.13189	5.35868	P	P	P	3.9026	3.80738	3.70225	A	A	A	CUST_116853_PI430048170	0	Noncoding	TTCTTAATATAGCCATCTCTTGCAGGAGGACTAGACATGCTCATTCTCAACCACATCACC	lncipedia	chr1	+	209706427	209720796
CUST_92426_PI430048170	0.0100736	0.458933	5.18991	4.61542	4.89118	P	P	P	5.88598	6.10019	6.12661	P	P	P	CUST_92426_PI430048170	0	Noncoding	CTGGTCTTTTGTTTGTGGAGAAAGAGAATCGGTTGTTATCATTTTAAAATCAGGACGTTT	lncipedia	chr19	+	3452640	3454350
CUST_104610_PI430048170	0.00342078	16.0127	7.6541	7.35482	7.47882	P	P	P	3.0867	3.15994	4.0451	A	A	A	CUST_104610_PI430048170	0	Noncoding	TTCAAAAGGTAGGACACCTGAGTGAACTTTGTAGAGTTTATGAGCAGTTCAAATTTACTA	lncipedia	chr9	+	33533441	33539558
CUST_20586_PI430048170	0.00428536	2.31885	5.60046	5.78283	5.91232	P	P	P	4.24578	4.68043	4.70183	A	P	A	CUST_20586_PI430048170	0	Noncoding	AGACCTTTGTTCAGGGACTCAAGTGGGAGGTTGAGCAATAAGCAAGCTTTCTTGCTTAGA	ENSEMBL_GENCODE	chr8	+	17905756	17907887
CUST_27693_PI430048170	0.00102168	0.355068	5.57284	5.48608	5.4234	P	P	P	6.87686	7.17061	6.90149	P	P	P	CUST_27693_PI430048170	0	Noncoding	GCAAGATGGTTGAAAGTCCTGGGTAAACCTTAACCATGATAATAAAAATGTGGTAAGTTA	RefSeq	chr15	+	35546194	35859001
CUST_61649_PI430048170	0.0105594	2.82958	6.69438	6.76204	6.68513	P	P	P	4.88241	5.25153	5.4507	P	P	P	CUST_61649_PI430048170	0	Noncoding	TCCTGCATCCCATTCTTCTACGGAGGAGACAAGAAAAAGATCAAGATCATCAGTATCTAA	lncipedia	chr15	-	28842234	28848582
CUST_96848_PI430048170	0.00841002	2.10983	7.95663	7.94256	7.9722	P	P	P	6.68042	7.02856	6.90975	P	P	P	CUST_96848_PI430048170	0	Noncoding	GTGAGAAAGAAACATGCCTGAGAGTCTAATGGATTACTCAAGTCTGTGCTGCCAAGGAAG	lncipedia	chr8	+	131053598	131129898
CUST_120779_PI430048170	0.00448498	0.391489	6.49257	6.50963	6.48744	P	P	P	7.7961	8.02168	7.71288	P	P	P	CUST_120779_PI430048170	0	Noncoding	ATCACCGGCACTGTCTTCACAGAGCTCAATGATGAGAAGGTGCTGCAGGTGAGTGGCCCT	NONCODE	chr17	+	45242416	45242515
CUST_57614_PI430048170	0.000856891	0.425649	8.17289	8.03851	7.93666	P	P	P	9.27245	9.24108	9.33933	P	P	P	CUST_57614_PI430048170	0	Noncoding	GAGATGATGGGCTTGCTGACTTCTAGGTTAGTTGGTAGAGATGCATTAACCTATTCTCAT	lncipedia	chr11	-	61964837	61967613
CUST_39024_PI430048170	0.000307693	8.86431	5.3119	5.19929	4.9948	P	P	P	1.96826	2.04054	2.06902	A	A	A	CUST_39024_PI430048170	0	Noncoding	TGAATCAATACAGAGTCAAGATTGCAGTCTGCATGAGATAGAGTCCTAGCGGGGAAGAAG	lncipedia	chr14	+	70681636	70700123
CUST_35059_PI430048170	0.00659036	0.438672	6.15703	5.92726	5.66876	P	P	P	7.04432	7.07833	7.23095	P	P	P	CUST_35059_PI430048170	0	Noncoding	TCACAACTCTGTAAAAATGTATGCATGCACACAGACAAGAACTAAAGTGGAACCCCACAC	RefSeq	chrX	-	134543376	134546630
CUST_54617_PI430048170	0.00277183	4.06466	6.30788	5.86397	6.17146	P	P	P	4.04967	4.16039	4.09681	A	A	A	CUST_54617_PI430048170	0	Noncoding	CGTAAGAATTCCTACTTCAAACCTCAGACTTCAAATAACTGCCAGAACTACTTGACTGAT	RefSeq	chr4_GL000008v2_random	-	161986	178171
CUST_45862_PI430048170	0.00404308	2.19262	6.91792	6.60464	6.79132	P	P	P	5.36324	5.83194	5.69835	P	P	P	CUST_45862_PI430048170	0	Noncoding	TCAGTAGTTAAGATTTCGGTGGTCTGGGGGTGAATTCCAGGTAGCAAGAGAAGAGTCTAA	lncipedia	chr1	+	89633071	89764518
CUST_103043_PI430048170	0.000534863	2.20187	5.52321	5.59456	5.73111	P	P	P	4.35874	4.43605	4.63179	A	P	P	CUST_103043_PI430048170	0	Noncoding	CGGACCACTAATCAGGATCATGTGTTTCAGATTTCACTTGACCAATAAATCAATTTCAAT	lncipedia	chr12	+	53728855	53731224
CUST_97004_PI430048170	9.39868e-06	0.425787	13.1738	13.0807	13.0967	P	P	P	14.3782	14.3081	14.3612	P	P	P	CUST_97004_PI430048170	0	Noncoding	TTCATAGCATTTGCTTATTCCGTGAAGTCTAGGGACAGGAAGATGGTTGGTGACCTGACT	lncipedia	chr6	-	34576257	34576656
CUST_107578_PI430048170	0.0112036	2.28574	6.61727	6.62558	7.20965	P	P	P	5.88234	5.48917	5.55469	P	P	P	CUST_107578_PI430048170	0	Noncoding	TCGCTGCTGAAGGCTGTGGTGGACCCGGCTGGATTGCGGATTCTGGGCTAGATCGCAGAT	lncipedia	chr9	-	62444255	62444634
CUST_61958_PI430048170	0.033767	4.48764	5.12627	5.63534	5.60409	P	P	P	2.18289	3.85155	3.42248	A	A	A	CUST_61958_PI430048170	0	Noncoding	TCTCAACTATCTTCACCTTACACCAATTACCGCCCTAATTGAAAACAAATTACTCAAATG	lncipedia	chr15	+	58154959	58156061
CUST_10363_PI430048170	0.0115865	0.435612	5.99609	5.71828	5.48195	P	P	P	6.98397	6.97338	6.87934	P	P	P	CUST_10363_PI430048170	0	Noncoding	TCACTGCCTCCTTGATGAGGACCAAGGGTCAATAAATGTTTGCTGAATTCCTTTGCCTCT	ENSEMBL_GENCODE	chr1	-	995966	998051
CUST_80721_PI430048170	0.0233436	2.65715	4.5286	4.85834	4.65881	P	P	P	3.09723	2.82976	3.74869	A	A	A	CUST_80721_PI430048170	0	Noncoding	CAACAGACACAGGTTTTCATATACATTCCATGTTATTCTGAATTACTGATGGGTTCACTG	lncipedia	chr9	-	39173793	39174513
CUST_11002_PI430048170	0.00832086	3.31056	5.32226	5.48366	5.39642	P	P	P	3.33193	3.63549	3.9843	A	A	A	CUST_11002_PI430048170	0	Noncoding	GCATTAGGTGCTCAATAATTGTTATCTATCCCTTTGGCTTAGTAAAAACCATTGTCAAAG	ENSEMBL_GENCODE	chr1	+	70445071	70445536
CUST_92064_PI430048170	0.00112212	0.270729	3.89771	4.30494	4.44158	P	A	P	6.37448	5.8386	6.09028	P	P	P	CUST_92064_PI430048170	0	Noncoding	GATGTCATTGAATCCTTTTCAAAGTGCAGTATGAAAACAAAGGGAAAAACACTGAAGCAC	lncipedia	chr15	+	39595679	39597832
CUST_45265_PI430048170	8.18554e-05	2.34802	7.69222	7.73039	7.74175	P	P	P	6.42657	6.50964	6.53215	P	P	P	CUST_45265_PI430048170	0	Noncoding	GAGCCTGAAGGGACCATATAATATGAAAAACGCTGAGAGGTTTTATTAGCCAATAAAAAA	lncipedia	chr6	-	45555842	45576771
CUST_122356_PI430048170	0.0143144	3.28564	9.36877	9.50361	8.67506	P	P	P	7.43706	7.68455	7.3883	P	P	P	CUST_122356_PI430048170	0	Noncoding	ATTCAGGATACTTACAGAAGCAGAGGCTGACGCTCACCTTGTCATTCTAGCAGAAACTAA	NONCODE	chr21	-	46072084	46072248
CUST_125335_PI430048170	0.00025761	2.59534	10.7313	10.7309	10.9737	P	P	P	9.40558	9.31933	9.58431	P	P	P	CUST_125335_PI430048170	0	Noncoding	CCACCTGATTAATGGGCCCTTTATCTTTGGTGTCCCCTAGGAGTGTCCAGTTGTTTTATT	NONCODE	chr8	+	17569140	17570516
CUST_26950_PI430048170	8.87079e-06	4.3088	6.86727	7.03908	6.98723	P	P	P	4.84648	4.77124	4.95351	P	P	P	CUST_26950_PI430048170	0	Noncoding	GTTAAATACCTCAAATCTTTCGAGAACAGCAAGGAGCAAAATAAACTTAACTTCTCTGAG	RefSeq	chr14	-	55781134	55796674
CUST_27411_PI430048170	0.000145666	4.71366	6.84345	7.02241	7.02632	P	P	P	4.71249	4.69832	4.77705	P	P	P	CUST_27411_PI430048170	0	Noncoding	TGGTCAAGTCAGTGTTCAAACTATCTCCTGCTCTTTCAAGGGGATCTGGGGCTCTAGAAG	RefSeq	chr14	+	100894769	100906968
CUST_39372_PI430048170	0.000507855	3.65918	8.37474	7.95389	8.33238	P	P	P	6.12445	6.4102	6.51957	P	P	P	CUST_39372_PI430048170	0	Noncoding	GTCTGCTATAAAGGAAAATTTGAAGACTTGGCAAACTCAGGCAAAAGACCCATTATGAAA	lncipedia	chr12	+	27702337	27702906
CUST_35291_PI430048170	0.00245902	2.12963	12.5253	12.5111	12.4383	P	P	P	11.276	11.5457	11.3695	P	P	P	CUST_35291_PI430048170	0	Noncoding	GTACACAACACACCTACATCAACTACAGCTTTGCTTTACTTTGGTGCAATTTTTGGAAAA	ENSEMBL_GENCODE	chr11	+	122451474	122451599
CUST_42450_PI430048170	0.00239449	2.09604	8.38136	8.43667	8.34331	P	P	P	7.24634	7.47065	7.23013	P	P	P	CUST_42450_PI430048170	0	Noncoding	CATGCCTGAGAGTCTAATGGATTACTCAAGTCTGTGCTGCCAAGGAAGAACAGAATCTTT	lncipedia	chr8	+	131053598	131129898
CUST_80191_PI430048170	0.00659672	0.451411	3.64506	3.92039	3.8325	A	A	A	4.73926	5.23281	4.83297	P	P	P	CUST_80191_PI430048170	0	Noncoding	TGTAATTCAGAGGAGTGAGAAAGGTTCTCAGAAGGAAAAACACCCATGAGGCTCCATCAC	lncipedia	chr8	-	114791652	114791929
CUST_80162_PI430048170	0.0460387	2.53598	5.08086	4.77667	5.06143	P	P	P	2.8967	4.06182	3.71964	A	A	A	CUST_80162_PI430048170	0	Noncoding	TATGCTGATATAATATGGGAACTAGGTTAACCCTGTTACTTTCTGGGAACATATGATCAT	lncipedia	chr8	-	104429146	104444368
CUST_114762_PI430048170	0.00560642	5.30135	12.5257	12.5695	11.9256	P	P	P	10.0525	9.90724	9.92246	P	P	P	CUST_114762_PI430048170	0	Noncoding	ATTCATGGTAGACTGTGTCATGAACAATGTCACCTGTTCTCAGATCTATAAAAAAGTAGA	lncipedia	chr4	+	159026138	159026527
CUST_111313_PI430048170	0.00127705	4.85855	6.07439	6.24302	5.58084	P	P	P	3.63376	4.05383	3.36307	A	A	A	CUST_111313_PI430048170	0	Noncoding	CACCTGTCCACCATTCAGAGCACAGACTTAATAGTGGTATTTTAGGATGGAAAAGTCAAG	lncipedia	chr4	+	157815009	157815480
CUST_111038_PI430048170	0.0205957	2.68176	9.07828	9.28332	8.51098	P	P	P	7.61935	7.63832	7.44358	P	P	P	CUST_111038_PI430048170	0	Noncoding	AGCTATCAGGATCTACAACAATGACAGATATGATGAGATCTGCACTGCTGGGGAGGCAAT	lncipedia	chr3	-	42051180	42051694
CUST_98764_PI430048170	0.0277999	2.52571	8.10632	8.02476	7.35351	P	P	P	6.53879	6.60604	6.43602	P	P	P	CUST_98764_PI430048170	0	Noncoding	TCATGCCAAATTCCAAAGCAACCTTACCGCTAAAGCTATTGGACACAGAGTCCGAGTGAT	lncipedia	chr4	+	94369832	94370163
CUST_103941_PI430048170	0.0125074	2.40411	10.4337	10.5674	10.0342	P	P	P	9.02102	9.14054	9.12602	P	P	P	CUST_103941_PI430048170	0	Noncoding	GCATCTAAGATGTGTTACCAGACCTACAGAGCTCATGGTTAGATTAAGCCATACGTGAGC	lncipedia	chr18	+	62415677	62416227
CUST_79370_PI430048170	0.028912	2.25778	6.91655	7.11943	6.23754	P	P	P	5.65895	5.91423	5.23572	P	P	P	CUST_79370_PI430048170	0	Noncoding	AACAGATACGGTTTCATCAACAGGAACGTCACCAAGGAAGATGTGTGTTCATCAGACTGC	lncipedia	chr7	+	152128878	152129686
CUST_90733_PI430048170	0.000219689	22.0783	6.74431	6.39016	6.61464	P	P	P	2.18093	2.11387	2.08082	A	A	A	CUST_90733_PI430048170	0	Noncoding	TCATGTTCTGGGAGGGCTAAGGCATCAACCTTACCCTGTAGGAATTCTAGTGACTATGTT	RefSeq	chr9	-	38540566	38545372
CUST_16904_PI430048170	8.39674e-05	3.44227	10.8575	10.6416	10.8832	P	P	P	8.88843	8.98601	9.15695	P	P	P	CUST_16904_PI430048170	0	Noncoding	TCCAGAGGGTGGCTCAGGACACGCCTAACGGAATTAGAGTATTCGCTGGTTATCCAGATC	RefSeq	chr5	+	473235	480891
CUST_61879_PI430048170	0.016485	2.14132	7.12128	7.31637	6.69401	P	P	P	5.8124	6.05592	6.02409	P	P	P	CUST_61879_PI430048170	0	Noncoding	TACATAAAGAGTCTTCAACTTAAATGACTTATCAAGCATAAATATTAAAATACTGGATGT	ENSEMBL_GENCODE	chr15	+	50355467	50372202
CUST_52460_PI430048170	0.000726725	0.445477	4.46974	4.61439	4.29831	P	P	P	5.61298	5.75972	5.51628	P	P	P	CUST_52460_PI430048170	0	Noncoding	TTCTAACGACTACAAGCTCAGCTTTGGAGCCGGAACCACAGTAACTGTAAGAGCAATATC	lncipedia	chr14	+	21998032	22547546
CUST_71619_PI430048170	0.000687233	0.442338	4.73875	4.95327	4.99975	P	P	P	6.08496	5.98911	6.15638	P	P	P	CUST_71619_PI430048170	0	Noncoding	AGTGAGATGAGCCCGAACTCTTTTCTCACCAGTATGATCTTATTATCTGGAAAAATACTT	lncipedia	chr21	-	17817720	17819362
CUST_105929_PI430048170	0.0305974	3.94851	4.9128	5.26406	5.13807	P	P	P	2.60695	2.5729	3.83159	A	A	A	CUST_105929_PI430048170	0	Noncoding	ATCAAAGATTTCAAGAACATTCAGCGCCCAGGGTCAAGTTTAACTCCAGCTCTGGATCAG	lncipedia	chr11	+	126776276	126842236
CUST_10604_PI430048170	0.000859481	2.23276	6.15056	5.90213	5.88029	P	P	P	4.63237	4.87962	4.94217	P	P	P	CUST_10604_PI430048170	0	Noncoding	ACTAGGATCTCGTTCAAGGCTGGTCCACCTCACACGAATCCTACCCCATGGGCGCTGGGA	ENSEMBL_GENCODE	chr1	+	24066774	24083565
CUST_116990_PI430048170	0.0125558	2.21542	10.8195	10.9378	10.3782	P	P	P	9.80594	9.70571	9.15912	P	P	P	CUST_116990_PI430048170	0	Noncoding	AAGAGAATGGGTCTCAAAATTCAAATTTTCTTGGGTGAAAAATACATCTGCAGGTTTCAG	lncipedia	chr1	-	52189915	52190309
CUST_48401_PI430048170	0.000137325	0.182468	4.66009	4.55951	4.54593	P	A	P	7.03801	7.05693	7.03607	P	P	P	CUST_48401_PI430048170	0	Noncoding	CTGCAGACCCTAGTTTTAGAGTTTCACTTCTTAAAGACCTTCATCCTTATTAAAATGGTA	RefSeq	chr12	-	68431841	68451484
CUST_58375_PI430048170	0.00171685	0.428445	9.88657	10.0069	9.79876	P	P	P	11.1397	11.1294	11.0989	P	P	P	CUST_58375_PI430048170	0	Noncoding	TGTATTTAAACGTGTATAGCTTAACCTGGATTAAACACGAGCAAGCGCGCGGGGTCCTTT	lncipedia	chr11	-	125445749	125451520
CUST_69593_PI430048170	0.0417875	2.29068	10.3948	10.4612	9.69225	P	P	P	9.00351	9.05965	9.01519	P	P	P	CUST_69593_PI430048170	0	Noncoding	CTTGTAAGACATGGTCTGTATGAGAAGAAAAAGAACTCAAGAAAGCAACAAGAGGGACAC	lncipedia	chr14	-	81332960	81333361
CUST_82340_PI430048170	0.00829128	2.02215	12.4137	12.4546	12.1101	P	P	P	11.3301	11.3572	11.2658	P	P	P	CUST_82340_PI430048170	0	Noncoding	TAAATTCCCATTTTACCTGAAGCTGCACTAGAACTGCTGATGGCTGTGAACTTTCTAGAT	lncipedia	chrY	+	9230914	9231247
CUST_68290_PI430048170	0.00549277	2.41794	6.53298	6.09922	6.65106	P	P	P	5.26412	4.95501	5.27686	P	P	P	CUST_68290_PI430048170	0	Noncoding	ACTTATAATACTGTTCTACTTATGACAAGATCCTTCAGGAAGAAGACCCTGGCGAAAATT	lncipedia	chr10	-	62793943	62795543
CUST_63111_PI430048170	0.00706287	2.45661	5.62441	5.05256	5.36696	P	P	P	3.69973	4.07813	4.3579	A	A	A	CUST_63111_PI430048170	0	Noncoding	CCAGATTTGAAACATCAATAATCTTTTGTGGAGAAGAAAAGTCCTCTGATTTTTCAGGAG	lncipedia	chr17	+	47323960	47342027
CUST_102111_PI430048170	3.11797e-06	8.59663	8.91325	9.0531	8.84977	P	P	P	5.8369	5.93332	5.73535	P	P	P	CUST_102111_PI430048170	0	Noncoding	GAGCCTGGCACCTTTATGTCAACATTTTTGATTCTAGCTACCTGTATTATTTCACCTAGC	lncipedia	chr12	-	10159667	10160561
CUST_80297_PI430048170	0.0245739	2.70169	5.20412	5.54448	4.93911	P	P	P	3.19602	4.29448	3.75351	A	A	A	CUST_80297_PI430048170	0	Noncoding	CTACAATCTAGATCAGAGCAGCAAGATGGCAACATAGAAAGATTGTGCCGTAATAGCTGC	lncipedia	chr8	-	133072907	133076127
CUST_51561_PI430048170	0.00452071	2.0963	6.0626	5.6621	6.08338	P	P	P	4.6828	5.00122	4.93896	P	P	P	CUST_51561_PI430048170	0	Noncoding	ACTAGCGGTTGTTGGTGAGGTTCTTCAGGCTGCAGATGGAGACATGGGAAGGGCTGGACT	RefSeq	chr20	+	4193089	4195953
CUST_31151_PI430048170	0.000553673	0.423641	4.67496	4.71807	4.43966	P	P	P	6.02534	5.76732	5.75616	P	P	P	CUST_31151_PI430048170	0	Noncoding	GCACCATTCTTACTGCTTTTCTGTAAATTCGGCTAAAATAAAGACGAGGGATAAAAGGCA	ENSEMBL_GENCODE	chr17	-	81697025	81697714
CUST_116147_PI430048170	0.000420763	0.431173	6.35682	6.48509	6.41572	P	P	P	7.61586	7.75262	7.52375	P	P	P	CUST_116147_PI430048170	0	Noncoding	ATACACCATTAAGGAAGAAAAGTCGACATTCCCCTTTTCAGCCTCCAACACTGGAGTTGG	lncipedia	chr14	+	92577294	92586580
CUST_110983_PI430048170	0.0341412	2.14311	6.02168	6.25943	5.37818	P	P	P	5.08389	4.41574	4.91688	A	A	A	CUST_110983_PI430048170	0	Noncoding	ACATGATCAAGGGGAAAACTGGAGATTCTCAAGACCTTCAATATCAAAAACAAACAGGAA	lncipedia	chr22	-	44413484	44414814
CUST_100471_PI430048170	0.0338991	2.22	4.78006	5.16483	4.78383	P	P	P	3.26983	4.22832	3.65019	A	A	A	CUST_100471_PI430048170	0	Noncoding	GTTTCTAAAAGGCAACAGGTGGATCAACTGCCTAGGATGCAAGAGAATCTAGTGAAAACG	lncipedia	chr13	-	36248601	36297832
CUST_52044_PI430048170	0.00701674	2.81544	9.95507	10.0481	9.46559	P	P	P	8.48687	8.33028	8.22443	P	P	P	CUST_52044_PI430048170	0	Noncoding	AGGGATTTCAATCACATCAGTGTAGATTCAGTCTTCTTGGAAAGAAAGAAAAGAGGCTCC	lncipedia	chr14	+	35262461	35263036
CUST_71305_PI430048170	0.0135255	2.06556	7.07743	7.14218	6.62267	P	P	P	5.77847	6.00254	5.96525	P	P	P	CUST_71305_PI430048170	0	Noncoding	TCAGACCCATGGAATTATGGGCATAGTTCATGCCAAATTCTGAAACAATCTTCCTGCTAA	lncipedia	chr20	-	47478213	47479010
CUST_126145_PI430048170	0.00327333	0.499867	8.28967	8.05771	8.12169	P	P	P	9.07676	9.006	9.37102	P	P	P	CUST_126145_PI430048170	0	Noncoding	TTGCAGTGTGCCTAGATTTTCCTCCAAGGACAAAAATGTGAATAAAGCAATATTTTAGCC	ENSEMBL_GENCODE	chrX	-	134544426	134545738
CUST_47046_PI430048170	0.0347218	0.447459	4.07369	3.57882	4.5428	P	A	A	5.04538	5.32881	5.43339	P	P	P	CUST_47046_PI430048170	0	Noncoding	CAAGTTCTGGACTGCCGTCAAGTTAGTCAAGTTTTAAAAATATGGATGACGATATGACCA	lncipedia	chr13	-	110956510	110971588
CUST_36038_PI430048170	0.016386	2.05056	5.88628	6.04858	5.7042	P	P	P	5.04222	4.99239	4.44415	P	P	A	CUST_36038_PI430048170	0	Noncoding	ATTAAGAAGAATGAAGGCAGATGTGACTGGGGCCAAAGATCTCAGTGCACATTCCTGACA	RefSeq	chr8	+	134598070	134600689
CUST_56188_PI430048170	3.28889e-05	0.438969	6.28862	6.37405	6.4325	P	P	P	7.60779	7.57392	7.47735	P	P	P	CUST_56188_PI430048170	0	Noncoding	TTGTGGATAGGAACATTGGATTGTCTTGACTGCCACTGGTGACATGCCAACTTACCAGAT	lncipedia	chr10	+	35196398	35211865
CUST_28514_PI430048170	0.00604284	0.471875	4.27446	4.19314	4.26309	P	A	A	5.47851	5.1329	5.35028	P	P	P	CUST_28514_PI430048170	0	Noncoding	CTCTGTACTTCGCTTGTCAGTTATCTTTGTTCCTTTTAAATAAAGGGCTTTTAAATGGAC	ENSEMBL_GENCODE	chr15	+	96342953	96345651
CUST_18403_PI430048170	0.00398537	2.75186	6.33192	6.49627	6.2819	P	P	P	5.05497	4.60205	5.03675	P	P	P	CUST_18403_PI430048170	0	Noncoding	ATCAAATGGCAGTTCTCGAGAATCGACGAGGAACTTAAATCTGGACTCAGGGTTTCAGTG	ENSEMBL_GENCODE	chr6	+	16761912	16762618
CUST_96799_PI430048170	0.0313786	2.80389	6.71662	6.85449	5.82009	P	P	P	5.1251	4.73881	5.22229	P	P	P	CUST_96799_PI430048170	0	Noncoding	CCTGGAACAAAAATGATCTTTGCTGGCATTAAGAAGAAGGCAGAAAGAAAAATGATAGCT	lncipedia	chr9	+	94038029	94038345
CUST_95918_PI430048170	0.030939	2.02458	9.16934	9.16019	8.60931	P	P	P	7.9389	7.98745	8.02629	P	P	P	CUST_95918_PI430048170	0	Noncoding	GCATAGTGAAAATAGCACTTTCAATGAGATTGTCAACATTGCCTGACAGATGCTGCACCC	lncipedia	chr8	-	105737279	105737765
CUST_50783_PI430048170	0.0128273	7.14295	4.69293	5.8868	4.93343	P	P	P	2.54318	2.23812	2.49473	A	A	A	CUST_50783_PI430048170	0	Noncoding	GGAGACTTCACAGAAATGGCAGAAGCTAGTTGAAGTCTACAAATTACCTAATGGAACAGG	RefSeq	chr10	+	61452638	61493431
CUST_2112_PI430048170	0.00258548	4.37808	6.57909	6.41329	6.61115	P	P	P	4.07105	4.63045	4.46325	A	P	A	CUST_2112_PI430048170	0	Noncoding	TCCAGAGACCCATTAGTGCCAAAGGCAAATGAAAACACACCCTGTGAAAATGTCAAAAAA	RefSeq	chr16	-	975760	981318
CUST_119975_PI430048170	5.62843e-05	2.44978	14.7566	14.8398	14.8453	P	P	P	13.5439	13.5226	13.4986	P	P	P	CUST_119975_PI430048170	0	Noncoding	ATTGAAAGATGGGAAATTAGTGGTGGAGTGTGTCATGAACCATGACATAGTAATCCAACA	lncipedia	chr13	-	73093625	73100948
CUST_44571_PI430048170	0.0036928	2.86719	4.51692	4.73986	4.41681	P	P	P	3.06244	3.03944	3.03181	A	A	A	CUST_44571_PI430048170	0	Noncoding	TGGATGCCTGAAGGGATGGGTGTCCCGTTTCTGAAACCCACAGAGCAGCCTTGATTGGGA	ENSEMBL_GENCODE	chr5	-	179377531	179378761
CUST_97572_PI430048170	6.7774e-05	3.40975	13.9021	13.7315	13.968	P	P	P	12.0649	11.9869	12.2392	P	P	P	CUST_97572_PI430048170	0	Noncoding	CCAGGGCAAATTGTATGTGCTCCTTACTGGGTTTATTATAAGTGTCACATGTTTTTTATA	RefSeq	chr5	+	473235	480891
CUST_95162_PI430048170	0.00233423	2.89998	7.59864	7.43421	7.53574	P	P	P	6.0425	5.74635	6.14707	P	P	P	CUST_95162_PI430048170	0	Noncoding	TAAAACTCCATTGGCCTCATGTCCAGAACTGAATCAGCATCTTCTGTATGACCTTTGTCC	ENSEMBL_GENCODE	chr5	+	477245	478651
CUST_80714_PI430048170	0.0034767	19.4479	7.09903	6.82411	6.95323	P	P	P	3.22863	2.41495	2.18289	A	A	A	CUST_80714_PI430048170	0	Noncoding	ATGAGTTGACATGCAAGCAGATTATGGTGACGGGCTTTAAGAAAGAGCATCAGAAGGTGG	lncipedia	chr9	-	38566259	38568009
CUST_47052_PI430048170	0.0182997	2.19398	8.21663	8.19269	7.64199	P	P	P	6.84906	6.82763	7.03468	P	P	P	CUST_47052_PI430048170	0	Noncoding	GGCACGAAAGTAGTTCTAGATGACAAGGATTAGAATTATTTCTTATTTAGAGATGGTGAC	lncipedia	chr8	+	102451762	102452483
CUST_107262_PI430048170	0.00391114	9.36925	5.76429	5.87637	5.72913	P	P	P	2.37179	2.22098	2.98089	A	A	A	CUST_107262_PI430048170	0	Noncoding	ACTGAGGAAACTTGTTACTGGGTGTGCAGATCATGATTCTGGAAGGAGGTGGTGTAATGA	lncipedia	chr11	+	34621092	34646551
CUST_99360_PI430048170	0.000703626	4.97231	6.87523	6.40559	6.64547	P	P	P	4.02442	4.2888	4.64237	A	A	A	CUST_99360_PI430048170	0	Noncoding	CAGATGCAGCATTTCTTGCAACAAGAGATACTACTTTTTCAAAAAGTCACTGAGGAATTG	lncipedia	chr4	-	49233288	49233965
CUST_109194_PI430048170	0.000124978	4.64692	5.52425	5.80076	5.89014	P	P	P	3.33329	3.57729	3.66073	A	A	A	CUST_109194_PI430048170	0	Noncoding	AACACAGTCACAAATGCCATCACCCATGCAGCAAAAAGTCTGGACAAACTTGGACAGTGA	lncipedia	chr10	+	46370363	46373557
CUST_13087_PI430048170	0.00632131	2.17492	5.69878	5.87557	5.33327	P	P	P	4.74321	4.52711	4.29085	P	P	A	CUST_13087_PI430048170	0	Noncoding	ACAAGGCTGAAGCAGGATCATTAAATCATAAACCTGGAGCACCTGGATAGTGAGTAGAGT	ENSEMBL_GENCODE	chr2	-	70059653	70063987
CUST_66517_PI430048170	0.00100821	2.06665	5.26886	5.27269	5.00631	P	P	P	4.26643	4.06319	4.08337	A	A	A	CUST_66517_PI430048170	0	Noncoding	GGTTTCACATTTTATGTTCTTTTTCCTGTGCAGGCTGGGAAAGGGTTTCTTCTGTCCATA	lncipedia	chr2	-	130034787	130035436
CUST_61381_PI430048170	0.0315428	2.38928	10.9061	11.0153	10.287	P	P	P	9.54502	9.52651	9.46729	P	P	P	CUST_61381_PI430048170	0	Noncoding	ACAAATTCTACTCAGTGAATGTGGATTACAGTAAACTGAAGAAAGAAGGTCCAGATTTCT	lncipedia	chr14	-	101969363	101969601
CUST_56489_PI430048170	2.36779e-05	3.06963	8.47024	8.30573	8.33886	P	P	P	6.71302	6.69088	6.85638	P	P	P	CUST_56489_PI430048170	0	Noncoding	GCTAGCAAAGAAGGGCTTTATTGTGTGGCCACATAGATTTTGGTATAAAGTGGGAACATC	lncipedia	chr10	+	73735440	73737780
CUST_79906_PI430048170	0.0174473	3.04751	9.12263	9.20015	8.39266	P	P	P	7.46506	7.37213	7.16838	P	P	P	CUST_79906_PI430048170	0	Noncoding	TATGATTCTGTGAAAGATTTTGAGGAGGTGAAGGAGGCTGGTACCTTTCAGAGTGCAAAG	lncipedia	chr8	+	64331926	64332152
CUST_73039_PI430048170	0.00208645	3.05859	6.16473	6.32183	5.87949	P	P	P	4.6167	4.71952	4.16812	P	P	A	CUST_73039_PI430048170	0	Noncoding	CAAGGGTTTTGGCCTTCCAACTATTTTTGTGTGTGTGTGAATATGACAGCACTGTGCACC	lncipedia	chr3	+	50612327	50614117
CUST_106807_PI430048170	0.0300683	2.51874	10.0856	10.1401	9.39068	P	P	P	8.62752	8.60445	8.49664	P	P	P	CUST_106807_PI430048170	0	Noncoding	GGAAAATGATCAGAAAAAGGAAGCCAAAAAGAGAGGTACCTGGGTTCAACTCAAGTGCCA	lncipedia	chrX	+	101339916	101340934
CUST_103350_PI430048170	0.0371074	2.50927	10.8378	10.828	10.0649	P	P	P	9.28517	9.31977	9.27091	P	P	P	CUST_103350_PI430048170	0	Noncoding	AATGACTATATGGCTGTCCACCAACCCATCACACATTCGAAGAACCAACCTACATGAAGA	lncipedia	chr2	+	130273907	130275449
CUST_66701_PI430048170	0.0172054	2.01347	7.9167	7.98508	7.97062	P	P	P	7.17316	6.67986	6.94924	P	P	P	CUST_66701_PI430048170	0	Noncoding	ATCTGCCTCTTCCTACATGTTGGCCGAGGCTTATACTATGGATCATTTATATTCCTAGAA	lncipedia	chr2	+	155314065	155314368
CUST_69060_PI430048170	0.00323616	0.379614	9.2425	9.2101	9.23297	P	P	P	10.7237	10.6843	10.4557	P	P	P	CUST_69060_PI430048170	0	Noncoding	TCTCTTTGCCATGAAGGAGGATAATGAGAAGGTGCCTACTTTGCTAACGGACTACATTTT	lncipedia	chr11	-	125445749	125451520
CUST_121247_PI430048170	0.000884336	2.60795	5.32439	5.30739	4.97879	P	P	P	3.94458	3.60938	3.91046	A	A	A	CUST_121247_PI430048170	0	Noncoding	AAAGCTTTCAACTGGTCCTCAAACCTTATGGAACATAGAGAATTCATACTGAGAGAACCT	NONCODE	chr19	-	21973465	21973659
CUST_70515_PI430048170	0.00235203	2.28548	8.36835	8.3894	8.08821	P	P	P	7.01491	7.15621	7.11288	P	P	P	CUST_70515_PI430048170	0	Noncoding	TTTCTCACTCACCCACCTGTTTCCTAAACAGATCAGTGCATTGTTGATGACATCACTTAC	lncipedia	chr2	-	215419288	215421270
CUST_113570_PI430048170	0.0220236	2.53001	5.15984	5.23007	4.58021	P	P	P	4.16994	3.49919	3.18783	A	A	A	CUST_113570_PI430048170	0	Noncoding	GAAATCACCTATGGTTTAAGCCCAAAGAACCAGTTGACTACAGATCTTGTGCTTATGACT	lncipedia	chr9	+	98890589	98891937
CUST_119582_PI430048170	0.00336273	11.7602	6.60627	6.49055	6.71502	P	P	P	2.51621	3.11049	3.39317	A	A	A	CUST_119582_PI430048170	0	Noncoding	TTCTAAAGCTACCCGGCAAGAACAGTTCCACCTAAGTATGAAACTGAGATCCTGTCTCAA	lncipedia	chr12	-	27535339	27552773
CUST_20740_PI430048170	0.0162878	2.42815	4.20112	4.65545	4.7696	P	P	P	3.34008	3.25891	3.24616	A	A	A	CUST_20740_PI430048170	0	Noncoding	GTGACAGAGTTTGCATAGAGATGGCCTTCTTGAGCAAAGGTAGTGACTCCTACATTTTTT	ENSEMBL_GENCODE	chr8	-	37405439	37406724
CUST_101785_PI430048170	1.04263e-06	8.61016	5.16964	5.11263	5.20836	P	P	P	1.98378	2.07215	2.11509	A	A	A	CUST_101785_PI430048170	0	Noncoding	ATGAGTTGACATGCAAGCAGGTGATGGTGACAGGCTTTAAGAAAGAGCATCAGAAAGCTG	lncipedia	chr2	-	94786687	94787261
CUST_80534_PI430048170	0.00269313	2.7006	8.0651	8.1178	7.90329	P	P	P	6.33009	6.77865	6.65002	P	P	P	CUST_80534_PI430048170	0	Noncoding	CCGTAGTATCACAGAATATGCTGCATTTAGATACAGGTTTAATTTGCCAGATTTTCTCAA	lncipedia	chr9	-	15163623	15166033
CUST_72781_PI430048170	0.00520852	2.24074	6.69889	6.22018	6.60532	P	P	P	5.04163	5.49094	5.49755	A	P	P	CUST_72781_PI430048170	0	Noncoding	GGTCCTGAAGAAAACATAGAGAAGCCTGACAGATTATATATATTCACAGCTTTGACTTAA	lncipedia	chr3	-	28132868	28133078
CUST_114277_PI430048170	0.00957627	2.45742	9.16329	9.1057	8.55146	P	P	P	7.86313	7.50492	7.61258	P	P	P	CUST_114277_PI430048170	0	Noncoding	GTAAGCATGGTCATGGAAGATAAATTTGGGTTTGAAATTCCTGGTATAGATATGGAAAAG	lncipedia	chr6	+	70734502	70734962
CUST_122118_PI430048170	3.62174e-05	4.20962	12.5687	12.4458	12.7048	P	P	P	10.4676	10.399	10.6331	P	P	P	CUST_122118_PI430048170	0	Noncoding	CTGTGTTCCTGGAGCATTTGTTGACCGCCAACTGACAACATGCTAGGTAGTGACCTAACC	NONCODE	chr20	-	38138044	38138128
CUST_36994_PI430048170	0.0461671	2.03839	5.23384	5.3211	5.43513	P	P	P	4.1854	4.73289	3.85925	A	P	A	CUST_36994_PI430048170	0	Noncoding	TTCATGTTTTGAAGTGTTCTAAATGGTTCAAAACGTGAGGCGCTGCTATACCCCCTCGTG	RefSeq	chrX	-	134546613	134546711
CUST_67403_PI430048170	0.0287711	2.51032	12.352	12.3766	11.6718	P	P	P	10.7871	10.8883	10.8439	P	P	P	CUST_67403_PI430048170	0	Noncoding	AAACATGTAACAATTATGCCAAAAGACATTCAGCTACCTTGCCGCATATATGGAGCACAT	lncipedia	chr17	+	60315833	60316215
CUST_111223_PI430048170	0.0231671	2.69276	10.6533	10.6339	9.93453	P	P	P	9.0618	9.06846	8.90774	P	P	P	CUST_111223_PI430048170	0	Noncoding	GGCCTTTCCTTACTAGTTTCAATCTCCAGTACGTATGGCCTAGATTATGTACAAAATCTG	lncipedia	chr4	-	25719754	25720030
CUST_31459_PI430048170	0.0126267	2.45451	7.03754	6.89942	6.90761	P	P	P	5.29386	5.74995	5.85872	P	P	P	CUST_31459_PI430048170	0	Noncoding	GGCGGTGATGGGTGACCTTGTTGATTCTTATCAGTTAGACAATAAAGGGTCCACATGTTA	ENSEMBL_GENCODE	chr18	-	24159509	24162211
CUST_76261_PI430048170	0.00801552	2.22445	7.674	7.52319	7.1463	P	P	P	6.3018	6.17611	6.44273	P	P	P	CUST_76261_PI430048170	0	Noncoding	CTCAGAGGAGGAGTATTCCACCAAAGAAGAGAAATATGAAAAGGAGATGAAACTGCTGGA	lncipedia	chr5	-	163709209	163709514
CUST_19760_PI430048170	0.00401469	0.489612	6.6741	6.67212	6.48613	P	P	P	7.42487	7.65563	7.82319	P	P	P	CUST_19760_PI430048170	0	Noncoding	TTACAGAGACTTGCTTGTTTTGCTTCCTCTTTTCACAACAAGAAGACAGACATCATTAAT	ENSEMBL_GENCODE	chr7	-	46688940	46759844
CUST_59951_PI430048170	0.00084112	2.0866	11.4573	11.4264	11.6971	P	P	P	10.3804	10.4303	10.5935	P	P	P	CUST_59951_PI430048170	0	Noncoding	GAGATATACTGTACTCATTGGGGGCCTTGGGGGTACTGCTGTTCTTATGTGGGATTTTAA	lncipedia	chr13	-	28385623	28385989
CUST_92_PI430057613	0.0175571	2.95007	4.24275	4.6752	4.65271	P	P	P	3.49651	2.56375	2.67936	A	A	A	CUST_92_PI430057613	0	Noncoding	TCTCCAGTGTGCTGATCTTCTGACATTCAGGTCTTCCAGTGTCTGCAATATCCAGGTATT	lncRNAdb	chrX	NA	140783163	140784664
CUST_15520_PI430048170	0.0452909	0.475142	4.17798	3.24342	4.08323	P	A	A	4.82888	4.62225	5.34525	P	P	P	CUST_15520_PI430048170	0	Noncoding	AATCCAATTCATTTGATAACTACAATTACCAAATCTGGGCATTGCTGACTACACAGTTCA	ENSEMBL_GENCODE	chr3	+	180414174	180422506
CUST_1597_PI430048170	2.77073e-05	0.185606	5.17222	4.92603	5.14482	P	P	P	7.39917	7.46283	7.66859	P	P	P	CUST_1597_PI430048170	0	Noncoding	CCTGTCTTCAAAGTCCTTTGGCAAGGAAGTTTTCTGTTATGAATAAATTAGTATCACAAG	RefSeq	chr6	+	136629113	136648198
CUST_53326_PI430048170	0.0120829	2.01991	5.71713	5.93411	5.64423	P	P	P	4.43513	4.76202	5.01378	A	P	P	CUST_53326_PI430048170	0	Noncoding	TCAGAAAGATGAAACTAAAGAATGCGAAGCAACCAGCACGTGAAGAAAAGCGGGTTTCGG	RefSeq	chr1	-	2350414	2352661
CUST_17941_PI430048170	0.0136523	2.1747	7.01087	6.88936	6.9103	P	P	P	5.76127	5.55726	6.08324	P	P	P	CUST_17941_PI430048170	0	Noncoding	GTACGTGCATTTGACCTATATTGCTATGTCTTTAATAAAAGCATCTGAGGAATAGTTCCT	ENSEMBL_GENCODE	chr5	+	142165767	142168387
CUST_103671_PI430048170	0.0126809	2.01649	6.04025	5.8896	5.59706	P	P	P	5.03226	4.4604	4.96819	P	P	P	CUST_103671_PI430048170	0	Noncoding	TCACAGACTCCTATTTGAAGTATTTGACGAAAATAGACTGGTAAGTGGATGCCTGTATTT	lncipedia	chr18	+	58221535	58252074
CUST_114899_PI430048170	0.0122279	2.32872	6.97305	7.07013	6.94098	P	P	P	5.44644	5.87553	5.95651	P	P	P	CUST_114899_PI430048170	0	Noncoding	TATGGATGATCTCCCCAGCGGCTGGTGTCTGGAGGCCTCCTCAGTGGAGGATCAGCAGCA	lncipedia	chr4	+	7075626	7077090
CUST_24320_PI430048170	0.00112587	2.34702	7.87623	7.68997	7.80173	P	P	P	6.57966	6.53419	6.56726	P	P	P	CUST_24320_PI430048170	0	Noncoding	GGCTCTCTGCACCAAATTCCTCCAAACTATTATAATATGTATTGTCTGTAGTGCTATTTA	RefSeq	chr11	+	95230185	95234404
CUST_36730_PI430048170	0.0381639	2.02594	5.47665	5.40168	5.28523	P	P	P	4.00408	4.22007	4.7767	A	P	P	CUST_36730_PI430048170	0	Noncoding	TCGTGGTTCCTGGGAGGTGTGATATCGTGGTTCCTGGGAGGTGTGATATCGTGGTTCCTG	ENSEMBL_GENCODE	chr9	-	134849813	134849960
CUST_102755_PI430048170	0.0155125	2.3015	6.68652	6.73693	6.68455	P	P	P	5.5477	5.18329	5.71921	P	P	P	CUST_102755_PI430048170	0	Noncoding	GGCATACATTCCACTGTTTATCATGCTTTGGATATTGCCAACAAGATTGGGATCATCTAA	lncipedia	chr17	-	14947740	14948198
CUST_10932_PI430048170	0.00550028	2.62066	7.50708	7.30854	7.49559	P	P	P	5.91471	5.84316	6.34043	P	P	P	CUST_10932_PI430048170	0	Noncoding	ACTCAATGCAACTATAACAATGAGGGAAATGTCTTGGCAGCTCTTGAAATCCATGGAAGA	ENSEMBL_GENCODE	chr1	-	59054397	59056049
CUST_22108_PI430048170	0.000274121	33.4101	7.46067	7.24384	7.52603	P	P	P	2.04616	2.69553	2.23812	A	A	A	CUST_22108_PI430048170	0	Noncoding	ATTCTGGGAGACAGCATGTGGTGGAATTCTTATTGAAGAACCAGGCAAATATACATGCCG	ENSEMBL_GENCODE	chr9	-	97200475	97238700
CUST_25273_PI430048170	9.74647e-05	0.366598	6.35074	6.5752	6.46746	P	P	P	7.85179	8.00961	7.87893	P	P	P	CUST_25273_PI430048170	0	Noncoding	CTCTTGAGAGTAATAAACTCAGCCAAGTCCTACTACTTGAGCCCATATTTAAATGCAGAA	ENSEMBL_GENCODE	chr12	+	65559591	65560889
CUST_24901_PI430048170	0.00015462	2.11506	7.56605	7.42519	7.55569	P	P	P	6.37687	6.37885	6.54667	P	P	P	CUST_24901_PI430048170	0	Noncoding	GGCCTTGTAGTTGTCCTTCATTAGAAGCTGGCATGAAAGAGTGTTTAATAAAATGGAGTA	ENSEMBL_GENCODE	chr12	+	27700066	27700574
CUST_95685_PI430048170	0.0184833	2.94566	10.6063	10.7217	9.97446	P	P	P	8.96461	8.95674	8.80594	P	P	P	CUST_95685_PI430048170	0	Noncoding	GGTTATTTAGAACTTCTTCATATGCTTGAATCTCCAGAGCCTCGCTGTACTAAGGTTGAC	lncipedia	chr4	+	102896724	102898237
CUST_81177_PI430048170	0.00515142	2.61992	8.71094	8.68787	8.13979	P	P	P	7.42188	7.06437	6.90312	P	P	P	CUST_81177_PI430048170	0	Noncoding	AAAGAGGTTTCTACTGGTACTACAACAAGTACATCGACGTGAAGAAAGGGTGTCTCAGGG	lncipedia	chr9	+	108836332	108836597
CUST_97917_PI430048170	0.0373942	2.00205	10.0898	10.2073	9.55655	P	P	P	8.97508	9.02466	8.92744	P	P	P	CUST_97917_PI430048170	0	Noncoding	AAATATGACAGGATAAATTCTACCTTGAACCGTATCTGAAAGCGGTTACTTGGGAGAGAA	lncipedia	chr1	-	162541331	162541628
CUST_113328_PI430048170	0.0231292	2.5591	7.42379	7.54304	6.77763	P	P	P	5.78411	6.01715	5.97673	P	P	P	CUST_113328_PI430048170	0	Noncoding	ACAGTTCACAGTAAAGTAGTCAGGAATTGATCTTGTGAACCCCACAGGGACCAAAAACCC	lncipedia	chr16	-	7126292	7126639
CUST_106970_PI430048170	0.00039148	2.53709	5.7096	5.64311	5.89905	P	P	P	4.38473	4.49957	4.34585	P	P	A	CUST_106970_PI430048170	0	Noncoding	TTAAATACACGGTGCAAGATAACCAGTAAAGGCGCGTTCCTTCTGAAAATTGAGGCCGGT	lncipedia	chr4	+	145482812	145514493
CUST_77884_PI430048170	0.0162378	2.96805	12.4925	12.4873	11.867	P	P	P	10.7966	10.7211	10.7039	P	P	P	CUST_77884_PI430048170	0	Noncoding	TTGCTGTAGCCCTTATTCTAGCCTATGTCTTTACACTCCTAGTAAGCCTCTGCCTACATG	lncipedia	chr6	+	153666626	153667318
CUST_114133_PI430048170	0.0132496	2.39634	11.689	11.7008	11.1487	P	P	P	10.3969	10.1947	10.2218	P	P	P	CUST_114133_PI430048170	0	Noncoding	GACGGTGTGTTTCTTTATTTTGAAGGTAATGCAGGGGTCATAATAAAAAACAAAGACGAG	lncipedia	chr7	+	26276194	26276606
CUST_45913_PI430048170	0.000385073	4.19641	7.59813	7.68728	7.73008	P	P	P	5.51725	5.50262	5.77472	P	P	P	CUST_45913_PI430048170	0	Noncoding	CGTTTCTTTAGTCAAATCTCCTTTTCTATAAAATGGAGACGGCTTTCATATGTTTGGGAA	ENSEMBL_GENCODE	chr6	-	167992822	167997077
CUST_53633_PI430048170	0.00473968	2.1974	8.63793	8.6359	8.19722	P	P	P	7.49219	7.42866	7.16549	P	P	P	CUST_53633_PI430048170	0	Noncoding	CTGGACATCTGGGTGAAGTTTTAATATGGTATAAAAATGTCCTTTATAGTAGAGGTATGG	lncipedia	chr1	+	25887359	25887610
CUST_53191_PI430048170	0.000101904	2.82236	8.36802	8.26725	8.29619	P	P	P	6.83419	6.80872	6.79949	P	P	P	CUST_53191_PI430048170	0	Noncoding	CTTCCTCCTCTCTTTAACACCAACTTACAACCAAAACGTCTACATCTGTTTTAAAAAGAT	RefSeq	chr16	+	88731179	88741425
CUST_44275_PI430048170	0.00102285	0.231554	4.71807	5.11057	4.85727	P	P	P	7.05557	7.05887	6.92709	P	P	P	CUST_44275_PI430048170	0	Noncoding	GAGCTGCAGACCCTAGTTTTAGAGTTTCACTTCTTAAAGACCTTCATCCTTATTAAAATG	RefSeq	chr12	-	68431841	68451484
CUST_118579_PI430048170	0.0162646	2.74228	5.19491	5.77435	5.64281	P	P	P	4.5813	3.62483	3.93176	A	A	A	CUST_118579_PI430048170	0	Noncoding	CTCAAGGTTACTCTGAAGTGGAGGGAAGGAAGCCGTTTTAATTTTGATAAAATAAACTTT	ENSEMBL_GENCODE	chr1	-	170460453	170517706
CUST_27095_PI430048170	0.00127441	4.45292	5.38632	4.7741	4.82825	P	P	P	3.15647	2.68457	2.71632	A	A	A	CUST_27095_PI430048170	0	Noncoding	TTCCTATCATCGGGGTTTTTGAAGAACATGAAATGACTGGGAAAATAATCATGTTAAGTG	ENSEMBL_GENCODE	chr14	+	70810330	70815403
CUST_12235_PI430048170	0.00306367	2.35392	6.97651	7.08428	7.08064	P	P	P	5.6075	5.88507	5.9259	P	P	P	CUST_12235_PI430048170	0	Noncoding	TTTCCTCCCCAAATCCAGGTGTCAAATTTCTTCACAAGATACATAAATTGCAAATTCCAA	ENSEMBL_GENCODE	chr1	+	243135898	243140588
CUST_39765_PI430048170	0.0133383	0.369529	5.56907	5.03826	5.58082	P	P	P	6.82255	6.83206	6.90446	P	P	P	CUST_39765_PI430048170	0	Noncoding	GATTTGAAGAGTTAAGAGACTCTGAATAATTGGCAGGGGAAGCTGGGATGGAGAACAAAG	lncipedia	chr6	+	14661327	14665220
CUST_19758_PI430048170	0.0109212	0.495918	8.02367	7.86412	7.83607	P	P	P	8.76212	8.76615	9.19421	P	P	P	CUST_19758_PI430048170	0	Noncoding	GCTCTTTATGGAGGTGTTTGGAAATCTTGAAATTCTTAAGGTTGCTTTGACCTTCTTAGA	ENSEMBL_GENCODE	chr7	-	46673785	46759851
CUST_104022_PI430048170	4.99356e-05	31.5837	8.06734	7.65473	8.07215	P	P	P	2.90557	2.8597	3.11144	A	A	A	CUST_104022_PI430048170	0	Noncoding	TAAGGCATCAACCTTACCCTGTAGGAATTCTAGTGACTATGTTGCCACCATCTTGGAGCT	RefSeq	chr9	-	38540566	38545372
CUST_123109_PI430048170	0.0344447	2.66652	8.95132	9.02796	8.15074	P	P	P	7.40856	7.40171	7.21903	P	P	P	CUST_123109_PI430048170	0	Noncoding	AAGAAGGGTATAGAGCCTGGGATGTCTGAACCAATCGTTTTGAGCCTGCTTTGGAGATAA	NONCODE	chr4	-	98713803	98713971
CUST_74298_PI430048170	0.0114071	2.31527	10.7196	10.7612	10.3326	P	P	P	9.39026	9.38128	9.44493	P	P	P	CUST_74298_PI430048170	0	Noncoding	CTACGAGATTCACTAAACTAACAGTTCCACTGAAATTTCTGAATTCCCAATTGCACTTGA	lncipedia	chr4	+	39932453	39933561
CUST_113483_PI430048170	0.0211361	2.30351	5.5658	5.46969	4.83824	P	P	P	4.5523	3.82039	3.87074	A	A	A	CUST_113483_PI430048170	0	Noncoding	CTCAAATTTGGAGAAACAGAGTTAATTTGGGCAAATCTACAAGTTCTGTTTTCGTTCCTA	lncipedia	chrX	-	53158825	53176631
CUST_65657_PI430048170	0.0169006	2.46467	8.6935	8.69357	8.14136	P	P	P	7.26917	7.26469	7.15471	P	P	P	CUST_65657_PI430048170	0	Noncoding	GCCCTTCAAATTATCTTCTGCATGAGGTGGAAAGAAGAAAAGGCCACCCACTTTGTAGAA	lncipedia	chr2	+	38231567	38232317
CUST_70720_PI430048170	0.000539708	2.04302	7.37561	7.21963	7.43274	P	P	P	6.17018	6.3351	6.42728	P	P	P	CUST_70720_PI430048170	0	Noncoding	GAAGTGTTCAGTTAAGTTTAAGTCTCAGTGATAAGTTTTCAGGCATTCACATGTGTTAGT	lncipedia	chr2	+	236007567	236010115
CUST_94427_PI430048170	0.0425759	4.82847	5.53317	5.23878	5.46089	P	P	P	3.9002	2.00783	2.92224	A	A	A	CUST_94427_PI430048170	0	Noncoding	TAGATGCCTTCCACACTGTCTGTGAGGTCTTTGCCAATCAGTCCAGGCAGGACCTGGACC	lncipedia	chr21	-	13905959	13906488
CUST_112332_PI430048170	0.00808866	3.7703	7.74804	7.89451	7.19967	P	P	P	5.60987	5.82183	5.74736	P	P	P	CUST_112332_PI430048170	0	Noncoding	ATTCAGGCAGGTGATGAATGGTTTTCAATACCAGAAGCACAGGAACGGGAAACAGTTCCA	RefSeq	chr10	-	47580670	47583419
CUST_97675_PI430048170	0.0176872	3.80136	6.31236	6.24584	6.1245	P	P	P	3.67413	4.52624	4.54939	A	A	A	CUST_97675_PI430048170	0	Noncoding	TTCATCATAAAGGATATGGAGCAAAATTAGAGGAGGCACGAGAAGGAAAGCCGGTGATGA	RefSeq	chr3	-	72035518	72100455
CUST_120126_PI430048170	0.000362644	2.14815	5.92293	5.95318	5.98215	P	P	P	4.76409	4.89607	4.88573	A	P	A	CUST_120126_PI430048170	0	Noncoding	AACCAGAAGTACATTTACGGTCTGTCAGTAAAGAAAACAAAAACTGCCTGTTGGTAAAAA	RefSeq	chr14	-	32075418	32076699
CUST_9798_PI430048170	0.00438904	2.3319	7.77178	7.38868	7.55859	P	P	P	6.43357	6.3162	6.32746	P	P	P	CUST_9798_PI430048170	0	Noncoding	TGTAGACTTTTGATATGAGAAATTGGTTTCAAAATCAGGAGTCGGGGCTTTACTGCTTTT	RefSeq	chr15	-	36972820	36972901
CUST_78153_PI430048170	0.0277614	2.13015	6.8394	7.27002	6.59892	P	P	P	5.89268	5.86666	5.75384	P	P	P	CUST_78153_PI430048170	0	Noncoding	GCAAAAATGCAAGCAACTGTAGAAAAAGAGACTTCTCTTCCCAAAGTGGAAGCCAAATTT	lncipedia	chr7	-	11257680	11258535
CUST_18306_PI430048170	0.000912158	6.46922	5.07654	4.93398	5.02176	P	P	P	2.54429	2.26553	2.11151	A	A	A	CUST_18306_PI430048170	0	Noncoding	GGAAAATGGTTTAAGGCCAAGGAAATACCTAGAAAACGGAAAGTCTTGAAACCAGAGCCG	ENSEMBL_GENCODE	chr6	-	2989726	2999134
CUST_81943_PI430048170	0.0140859	2.44044	6.61543	6.56994	6.00347	P	P	P	5.23141	4.98272	5.17824	P	P	P	CUST_81943_PI430048170	0	Noncoding	ATTACTATCCAGGAGTTGTTCAGGTGTATTTCAGAGCAGTTCACAGCCATGTTTAGGTGC	lncipedia	chrX	+	94319037	94320025
CUST_33912_PI430048170	3.89004e-05	2.04202	6.15855	6.27949	6.25831	P	P	P	5.17481	5.16979	5.26272	P	P	P	CUST_33912_PI430048170	0	Noncoding	GGCTTCTCGAGGGGTAAAAAATTACCCAGTGGGTATTTGAAGGAGAAAGTAAATAAAAGA	ENSEMBL_GENCODE	chr21	-	33967101	33968573
CUST_52516_PI430048170	0.0100688	0.454745	4.83396	5.15773	4.54924	P	P	P	5.8756	6.17725	5.94543	P	P	P	CUST_52516_PI430048170	0	Noncoding	AATCTCACTACCCAGAGAGAAGCAATGTTGACATATTTCTCTTCCTCAATGCATATTTAT	lncipedia	chr15	-	85314666	85315516
CUST_126521_PI430048170	0.041689	2.05122	4.95153	5.21387	5.23483	P	P	P	3.5872	4.48662	4.09588	A	P	A	CUST_126521_PI430048170	0	Noncoding	AACTACTCAACTATCAATAAACCTAGGAATGGCCATCCCACTATGGGCAGGGGAAGTAGT	NONCODE	chr17	-	18986147	18986334
CUST_67091_PI430048170	3.30034e-05	3.15959	8.67012	8.66809	8.83726	P	P	P	7.05284	7.1467	6.99947	P	P	P	CUST_67091_PI430048170	0	Noncoding	CAGAGATGACAAGGTTTCTCAGAGAATGCGTGAGTAACTGGAATGGCTTTTCCTGATGAC	ENSEMBL_GENCODE	chr11	+	17380649	17383531
CUST_20784_PI430048170	0.00294484	7.64984	5.00682	5.1406	4.59465	P	P	P	2.02473	1.99322	1.97168	A	A	A	CUST_20784_PI430048170	0	Noncoding	ACAAGTGACTTCACTTTTGAGCATCGGTTGAACCAGATTTAACGTCTCTTCCAGTTCTAA	ENSEMBL_GENCODE	chr8	-	41275115	41277003
CUST_115414_PI430048170	0.0202461	2.50105	12.1038	12.216	11.5936	P	P	P	10.6751	10.704	10.639	P	P	P	CUST_115414_PI430048170	0	Noncoding	CAAATGTGTAACAATTATGCCAAAAGACATCCATGCTGCATTCATGGAGAACTTGCTTGA	lncipedia	chr2	-	208466237	208466626
CUST_21807_PI430048170	0.00118178	24.1823	8.24294	7.77237	8.17749	P	P	P	2.80285	3.62806	3.8277	A	A	A	CUST_21807_PI430048170	0	Noncoding	AATTTCTGGCTGGGAAGTGCTTCCAGGGTTTCATATGTGTTATGGAGATGCTTCCTCTCT	ENSEMBL_GENCODE	chr9	-	66047084	66051775
CUST_49882_PI430048170	8.87063e-06	0.359463	7.61721	7.60037	7.71954	P	P	P	9.06919	9.18841	9.1081	P	P	P	CUST_49882_PI430048170	0	Noncoding	CCCAACCCCTTGTTTCTATACATTCTATGTTGTCTTTTAAAAAGTGTGCTTAACATTGAC	lncipedia	chr2	-	60452153	60460455
CUST_31764_PI430048170	0.00328936	0.462918	7.22378	7.50406	7.24911	P	P	P	8.38383	8.48093	8.46086	P	P	P	CUST_31764_PI430048170	0	Noncoding	GCACGAAAAGTGTAAGAATTGACATAGTAAATATGCAGGCACTCATTGATCACTTAAGAA	ENSEMBL_GENCODE	chr18	-	68753179	68754583
CUST_113954_PI430048170	0.00130036	0.36003	6.17582	6.37714	5.9588	P	P	P	7.62826	7.5415	7.78319	P	P	P	CUST_113954_PI430048170	0	Noncoding	TTGGTTTGCTTCAAAAGACCAAACCTGAGATTGCTGGGTTCACCCTGGAATAGCTCAAAC	lncipedia	chr7	-	141931507	141946887
CUST_31849_PI430048170	0.00386597	0.408135	3.70334	3.29952	3.3406	A	A	A	4.71224	4.67952	4.85908	P	P	P	CUST_31849_PI430048170	0	Noncoding	CACTGTTAGTTCTAGCCAATAGCTTCATAACTTACTACAAGGTAAGTCTACAAATTCTTG	ENSEMBL_GENCODE	chr18	-	77002849	77006846
CUST_55004_PI430048170	0.0296961	2.66998	4.83887	4.81501	4.66166	P	P	P	3.1038	2.95169	3.84876	A	A	A	CUST_55004_PI430048170	0	Noncoding	TAAAGCTGATTATCTCTGGCCATTCCTTAAGGAAACAGGCACTGTCTTAAATCGTGGTTT	lncipedia	chr1	+	161592149	161605662
CUST_39123_PI430048170	0.029618	2.16079	6.7994	6.92955	7.57686	P	P	P	5.88466	5.65619	6.43977	P	P	P	CUST_39123_PI430048170	0	Noncoding	TTCATCCACTCACAGGTCACTCCCTTCTTAGCTGGAACCTGGACCCTGGCTCAACTTGAA	lncipedia	chr17	+	36659519	36683611
CUST_76903_PI430048170	0.000689147	2.64439	7.10211	6.7325	6.92582	P	P	P	5.65538	5.52705	5.37965	P	P	P	CUST_76903_PI430048170	0	Noncoding	TGAGAATCAATGTTTTAGCTGTCCCATAGTCTGACGTCTGTTTCCGACCGCTTTTGAGCT	lncipedia	chr6	-	16739601	16761463
CUST_98173_PI430048170	0.000171737	2.83313	9.11624	9.19657	8.92933	P	P	P	7.66502	7.4617	7.61346	P	P	P	CUST_98173_PI430048170	0	Noncoding	TGACTTCTTGGAGAGCCACTTCCTAGATGAGGAAGTGAAACTCATTAAGATGGGTGACCA	lncipedia	chr13	-	97986949	97987216
CUST_122193_PI430048170	0.0288596	2.04021	5.40148	5.09372	5.31348	P	P	P	4.04903	4.65496	3.92597	A	P	A	CUST_122193_PI430048170	0	Noncoding	GGGGAATTTTCCATGAGCCTAGTATAGATCTAAATCTTAGCAATCTGTTTTCTTACAGTA	lncipedia	chr21	+	13062940	13067865
CUST_67887_PI430048170	0.0453605	0.21034	3.14699	2.71893	4.38815	A	A	P	4.71988	5.45414	6.68331	P	P	P	CUST_67887_PI430048170	0	Noncoding	GGCGGGGTTGAAAAATAGACTCTTAGATTTAAATATACGGTTTTGGTGGGTTTGGTTGTT	lncipedia	chr20	-	18589320	18589874
CUST_12198_PI430048170	0.0133635	0.413816	4.55405	4.61176	3.97246	P	P	A	5.55383	5.84244	5.62735	P	P	P	CUST_12198_PI430048170	0	Noncoding	TTTTCATCCAGAAGTTCTTAGATGATGTGTTCCAATCACTTTATAGAGTGGCTTCTTCTT	ENSEMBL_GENCODE	chr1	+	238276037	238287016
CUST_120099_PI430048170	0.0118052	0.44636	4.52471	4.12702	4.73751	P	A	P	5.69734	5.74427	5.49141	P	P	P	CUST_120099_PI430048170	0	Noncoding	TAACGACTACAAGCTCAGCTTTGGAGCCGGAACCACAGTAACTGTAAGAGCAAATATCCA	NONCODE	chr14	+	22524327	22547549
CUST_124793_PI430048170	0.014753	2.03194	7.43584	7.46475	7.02225	P	P	P	6.35194	6.22665	6.31383	P	P	P	CUST_124793_PI430048170	0	Noncoding	GGCTATCTACTGAAGTCCTCTCCAAAGTGAAATTTATTCAAAAGAAGAAATTAGTAGGGA	lncipedia	chr6	+	30031712	30033003
CUST_15430_PI430048170	0.00114189	0.320551	5.38479	4.87962	5.08991	P	P	P	6.75537	6.56096	6.97698	P	P	P	CUST_15430_PI430048170	0	Noncoding	ATCCAGTGTATGTTCTTAAGTCCTGGTGCTAGATGCAAATTAAAGATGAGTAATGCAAAT	ENSEMBL_GENCODE	chr3	-	166569693	166570763
CUST_24886_PI430048170	0.00107882	7.63045	7.16867	6.82796	7.30512	P	P	P	3.68893	4.30047	4.4508	A	A	A	CUST_24886_PI430048170	0	Noncoding	GGGCCTGAAATTCACCATTCACACCATCAAACTGGACTAACAGGAAAGAAGATTATGTAA	ENSEMBL_GENCODE	chr12	-	26231394	26271920
CUST_114976_PI430048170	0.0124988	2.23239	10.3182	10.3142	9.75849	P	P	P	8.95321	9.16425	8.84806	P	P	P	CUST_114976_PI430048170	0	Noncoding	ATCTTACTGTGCTGAGATTGCTCAACATGCTTCTCCAAGAACGGTTAAAGCCACTGTGGA	lncipedia	chr3	+	150150537	150150944
CUST_98584_PI430048170	0.0217073	2.497	10.9543	11.0446	10.4137	P	P	P	9.51041	9.53833	9.47959	P	P	P	CUST_98584_PI430048170	0	Noncoding	CTTATTGAGGAGCAGAAAATTGTTGTCAAAAGTGTTGAAGGAACAAGCACAGAGGCAGAA	lncipedia	chr21	-	35472094	35472432
CUST_110783_PI430048170	0.0453041	2.53423	10.4519	10.5519	9.60625	P	P	P	8.94777	9.00482	8.79796	P	P	P	CUST_110783_PI430048170	0	Noncoding	GAAGATGATGAGAATGATGATGCCTATACCAAGAAGCAGAAGACCAACAAGGATGACTAG	lncipedia	chr20	+	18011954	18012284
CUST_89720_PI430048170	0.0419211	2.26875	5.73013	5.03158	4.96713	P	P	P	4.0748	4.08635	4.15072	A	A	A	CUST_89720_PI430048170	0	Noncoding	TAGGGATGCTGATAAGGACCTTTGCAGCTCTGATATGTGTACTGAATGCTTCATGTGCTG	lncipedia	chr4	+	145484512	145514703
CUST_88449_PI430048170	0.000102187	2.26406	8.61117	8.53611	8.69111	P	P	P	7.33988	7.42891	7.53071	P	P	P	CUST_88449_PI430048170	0	Noncoding	GCTTCAATTCCTTAGAAGAAAGAAAGAGATGACTCCTGCTTCATAGTCCAGGAAAATCCC	ENSEMBL_GENCODE	chr1	-	42841898	42846387
CUST_38317_PI430048170	0.00643512	0.496831	4.81922	4.76202	5.08534	P	P	P	5.92024	5.85274	5.94068	P	P	P	CUST_38317_PI430048170	0	Noncoding	AGCGGCTCTGGGCAGGAATCCAACAAATAAATAAAACGTCTAAGACGGCGTGACAACAAT	ENSEMBL_GENCODE	chr17	-	36932109	36936622
CUST_21293_PI430048170	0.00113028	3.09453	9.38715	9.29199	9.32898	P	P	P	7.66699	7.57708	7.86165	P	P	P	CUST_21293_PI430048170	0	Noncoding	CCCTTGCAAATGGAAGTGATGACAGACCCAATACTTTGTGTAAAAATATTTTGCTATTTC	ENSEMBL_GENCODE	chr8	-	103481266	103481619
CUST_96634_PI430048170	0.0110061	2.21829	5.74672	5.82081	5.94173	P	P	P	4.68264	4.9422	4.39035	P	P	A	CUST_96634_PI430048170	0	Noncoding	AGTAACTTGGATCTTAATTTTGAGATCAGCTTTGGGGGAATTCCGACACCCGGAAGATCG	RefSeq	chr9	+	67059459	67294592
CUST_14595_PI430048170	0.00335222	0.432351	6.71937	6.72413	6.71595	P	P	P	7.79818	8.04071	7.9395	P	P	P	CUST_14595_PI430048170	0	Noncoding	TGCCTGAGCCTCTGTTTCTTAGGTTTCTAAATAGACAGCCAAATGTAATTCTGAATCAAT	ENSEMBL_GENCODE	chr3	-	16687986	16697479
CUST_125771_PI430048170	0.00280143	0.349998	4.07351	4.28494	3.72581	A	A	A	5.60711	5.78844	5.23227	P	P	P	CUST_125771_PI430048170	0	Noncoding	GTCTAGAGGGTGAGGTATGTCATTTACATGAAGGTTAAGAATAAAACAGAAAGTGCCTCT	lncipedia	chr9	+	95018890	95022280
CUST_14653_PI430048170	0.000956444	2.01485	5.64227	5.40586	5.37791	P	P	P	4.30993	4.5136	4.57243	P	P	A	CUST_14653_PI430048170	0	Noncoding	AAAGTGTTTGGTGATGGAAAGAACACCAGTGGAAAACGGCAAATAACAGTATTTCCAACT	ENSEMBL_GENCODE	chr3	+	27712910	27714005
CUST_116535_PI430048170	4.33935e-05	0.485409	14.5658	14.522	14.4479	P	P	P	15.5856	15.5094	15.5703	P	P	P	CUST_116535_PI430048170	0	Noncoding	TTGGGCATCCTCACGACCATTCTGCTCATCGTCATCCCAGTGTTGATCATCCAAGCCCAT	lncipedia	chr11	-	69303411	69303807
CUST_76645_PI430048170	0.000761398	2.68861	4.75841	4.97676	4.78479	P	P	P	3.50871	3.52033	3.1977	A	A	A	CUST_76645_PI430048170	0	Noncoding	CAGGTATAGAAATAAGTTTTGTAATCATTGTACTGTTTGAAAGTCTTAGGAGAGGCTAGC	lncipedia	chr6	-	2965453	2967178
CUST_105164_PI430048170	0.000596358	4.11186	5.65554	5.55743	5.27561	P	P	P	3.52019	3.51965	3.34913	A	A	A	CUST_105164_PI430048170	0	Noncoding	TATTCTCCAAACACCCATAAGAATTCCTATTTCAAGCCCACAGACTTCAAATAACTTCAA	RefSeq	chr2	-	94760927	94857075
CUST_47942_PI430048170	0.00204879	2.31883	6.97993	6.84661	6.80083	P	P	P	5.55983	5.54208	5.86757	P	P	P	CUST_47942_PI430048170	0	Noncoding	TGGGTATGTGTGACATCAACAAGAAGCAGCAGACAAAACAAAATATTTTCACAAACATTC	RefSeq	chr21	+	34180676	34183245
CUST_117495_PI430048170	0.0115461	2.17115	10.4762	10.6955	10.2367	P	P	P	9.39004	9.38846	9.30941	P	P	P	CUST_117495_PI430048170	0	Noncoding	TAACCATCTTGTCAAGACCCAAACCAGAGTTTCTGTATAGAGGATCCAGGCTCCAACTGT	lncipedia	chr16	-	57332378	57332599
CUST_27695_PI430048170	1.55206e-05	0.389277	6.70879	6.65794	6.73814	P	P	P	8.05857	8.08605	8.04447	P	P	P	CUST_27695_PI430048170	0	Noncoding	AACAAAGTGCCAATTCTGGTCTAATCATGTATGGAACCAAATATGTTGATGAGTCCTAAG	RefSeq	chr15	+	35546194	35859001
CUST_67249_PI430048170	0.0280208	2.0182	5.10489	5.82469	5.53283	P	P	P	4.04588	4.74337	4.63061	A	P	P	CUST_67249_PI430048170	0	Noncoding	CATTTCAGACCCTGAAAAATCCCTGAAAATTGAATTCTCAATAGATAATGCAACTCCACA	RefSeq	chr13	-	92701388	92719955
CUST_79189_PI430048170	3.10693e-05	4.26466	8.30577	8.14813	8.12617	P	P	P	6.09704	6.16513	6.04482	P	P	P	CUST_79189_PI430048170	0	Noncoding	TTCTATTTTCCTTGGTTGCTTGGTAATCCCCCACTGTTACTGCTGAGGTTCTTTCAGATG	lncipedia	chr7	+	134986554	134995550
CUST_111997_PI430048170	0.00666062	4.18772	6.82239	6.88447	6.85705	P	P	P	4.89733	4.98823	4.4181	A	A	A	CUST_111997_PI430048170	0	Noncoding	GAACGAGGTACTCTAGAAACCTGGCTGTTGCATTATTAAATATTTTGTGTATAGTTTCGG	lncipedia	chr8	-	101788633	101790934
CUST_38288_PI430048170	0.00249196	3.16651	6.59267	6.50003	6.03142	P	P	P	4.86604	4.80288	4.50108	P	P	A	CUST_38288_PI430048170	0	Noncoding	GTCTTGTTTGTTGACATGCCAAATTAACATAGTTCCATCTGGAAATGAGCATTTGAAATG	lncipedia	chr12	+	19306777	19528436
CUST_55272_PI430048170	0.00154811	0.455677	8.28743	8.31175	8.13039	P	P	P	9.40595	9.36021	9.37139	P	P	P	CUST_55272_PI430048170	0	Noncoding	TAGCACTCAATTCTGCCAACTCCTTTTAGACAAATTTGCCAAGACAATTAGGTATTTTCA	lncipedia	chr1	+	192575762	192577276
CUST_55762_PI430048170	0.00502824	0.400183	5.4939	5.01202	5.33364	P	P	P	6.57956	6.53196	6.72562	P	P	P	CUST_55762_PI430048170	0	Noncoding	CTCAGAGGACTGTGGATTGAATGAACTGTATCCATCCCCATCATGATGTACAGAACCAAG	lncipedia	chr1	+	239408219	239546612
CUST_119877_PI430048170	0.00230977	2.17328	7.50839	7.44715	7.60255	P	P	P	6.2216	6.4068	6.55509	P	P	P	CUST_119877_PI430048170	0	Noncoding	GCTTGCATTTGGGAAGGGAATGGAGAAAGGAAAGAACCAATAAAGCTTTCAAAGTTCAAG	lncipedia	chr13	-	28374520	28385750
CUST_118814_PI430048170	0.0152886	4.02256	4.79196	4.78357	4.88677	P	P	P	3.17797	2.85305	2.2669	A	A	A	CUST_118814_PI430048170	0	Noncoding	TAAATTTCCTGTGAATGTTCAATTACACATAATAAACATTATTGAATTGTACACAAAAAA	NONCODE	chr10	-	16823966	16824361
CUST_55275_PI430048170	0.00330361	0.466039	6.36151	6.44293	6.09908	P	P	P	7.49583	7.38606	7.34369	P	P	P	CUST_55275_PI430048170	0	Noncoding	GTGCCAACATAAGCCTTTTGCCTACTGGTATCTTAGTCTTTAAAAAGCTAAATTTTGAGA	lncipedia	chr1	+	192809038	192810899
CUST_70723_PI430048170	5.50925e-06	0.259895	7.71527	7.68413	7.76785	P	P	P	9.59848	9.67842	9.72093	P	P	P	CUST_70723_PI430048170	0	Noncoding	GAGAAGGTATTATGATTTCTAATCAGGCCCAGAACAGGCCAAGTATAGGCTTTCTGAATG	lncipedia	chr2	+	236569824	236571618
CUST_70739_PI430048170	0.000255306	2.9448	12.2832	12.3735	12.5394	P	P	P	10.6705	10.8541	10.9909	P	P	P	CUST_70739_PI430048170	0	Noncoding	AAAGGTAAAGATGATGATTCTTTTGATCGGAAATCAGTGTACCGAGGCTCGCTGACACAG	lncipedia	chr2	+	237552026	237553811
CUST_113809_PI430048170	0.00961167	2.55545	8.3396	8.32395	7.79862	P	P	P	6.84237	6.92236	6.68994	P	P	P	CUST_113809_PI430048170	0	Noncoding	CAAGCTCTGTGGGGCTTTCAAGAGGTTCTCAAACAGTGCAGACTTGCAAACAGATAGGCC	lncipedia	chr8	-	54191581	54192035
CUST_111853_PI430048170	0.000405387	2.13614	9.4207	9.19979	9.20681	P	P	P	8.08872	8.1786	8.27972	P	P	P	CUST_111853_PI430048170	0	Noncoding	TCTATTCCTCATAAGAAAACCAATAGCATAGACCTGGAAAATAGCTCTCTGGTCAAAAAA	lncipedia	chr7	+	106882163	106882936
CUST_114705_PI430048170	0.0176773	2.38821	11.1608	11.2361	10.6745	P	P	P	9.73722	9.79261	9.83392	P	P	P	CUST_114705_PI430048170	0	Noncoding	TGTCAGAGTAGCCAATGTCTCTTGGTCCTATACAAAAGCAAGAAGGAAAGACCAAGATCA	lncipedia	chr5	-	13250234	13250662
CUST_77725_PI430048170	5.22912e-05	3.72246	11.035	10.8884	11.0977	P	P	P	9.10797	9.04646	9.18266	P	P	P	CUST_77725_PI430048170	0	Noncoding	CTCAATACTCTTCCTCTTCCTGTAACAGAATATTTACAGACGTGCTTAGACAAATGTTGA	lncipedia	chr6	-	131825980	131828413
CUST_104932_PI430048170	0.000373768	2.98123	8.41093	8.10172	8.33674	P	P	P	6.59724	6.80078	6.73398	P	P	P	CUST_104932_PI430048170	0	Noncoding	GCAAAGAAGGGCTTTATTGTGTGGCCACATAGATTTTGGTATAAAGTGGGAACATCTAAA	lncipedia	chr10	+	73735440	73737780
CUST_66446_PI430048170	0.0368526	2.03508	12.3182	12.3014	11.7089	P	P	P	11.1493	11.0955	11.0868	P	P	P	CUST_66446_PI430048170	0	Noncoding	GAAAAAACTTCCTACCACTTACACTAGCATTCTACATATATCTCAATGCCTGTCCTAATT	lncipedia	chr2	+	117023917	117024867
CUST_117433_PI430048170	0.0473366	2.95148	8.82008	8.69128	7.68948	P	P	P	6.81503	6.85561	7.07382	P	P	P	CUST_117433_PI430048170	0	Noncoding	AAGTGTATGGTAAAGCAGACATGAATACATTCCCTAACTTCAAATTTGAAGATCCCAAAC	lncipedia	chr8	+	98633546	98633865
CUST_104426_PI430048170	0.00185675	2.1753	8.32071	8.35848	8.32654	P	P	P	7.1607	7.14822	7.3265	P	P	P	CUST_104426_PI430048170	0	Noncoding	TGCCTGAGAGTCTAATGGATTACTCAAGTCTGTGCTGCCAAGGAAGAACAGAATCTTTAG	lncipedia	chr8	+	131053598	131129898
CUST_114230_PI430048170	0.000201231	7.34277	5.40906	5.04523	4.85908	P	P	P	2.51687	2.05466	2.12371	A	A	A	CUST_114230_PI430048170	0	Noncoding	ATGATCAGGCTTGTGTCCACAAAAGGGAAGATGTATGTCTTCTTTAATGATGAAAGCAAG	lncipedia	chr6	+	137746938	137747288
CUST_7499_PI430048170	0.00113989	2.85871	8.15035	8.16145	7.84102	P	P	P	6.54734	6.44803	6.62809	P	P	P	CUST_7499_PI430048170	0	Noncoding	CCACTGAAAGGGTGCAATACAGATGTCTTGAAATGTGTGTTGAATGGATGAATATATAAA	RefSeq	chr1	+	121519111	121571888
CUST_111350_PI430048170	0.0430641	2.25243	10.2539	10.2872	9.53201	P	P	P	8.93751	8.85676	8.88154	P	P	P	CUST_111350_PI430048170	0	Noncoding	TTAAAGACATCAACCTATGTGTTATCCATGCCAGGCGTGTCACAGTTATGCCCAGAGACA	lncipedia	chr5	-	17625550	17625959
CUST_80711_PI430048170	1.84738e-05	36.8986	9.7212	9.36787	9.81251	P	P	P	4.12694	4.66699	4.47737	A	A	A	CUST_80711_PI430048170	0	Noncoding	TTCATTGATGCACTTGTGCCGAGCAAGCTTATCTGATCTTCTGGGATCTCTACTAGGATG	ENSEMBL_GENCODE	chr9	-	38540567	38542765
CUST_122195_PI430048170	0.0191295	2.03395	5.65834	5.12506	5.47072	P	P	P	4.35747	4.39539	4.47557	P	P	A	CUST_122195_PI430048170	0	Noncoding	TAAAATGAAACAATTGCTCAACTGATCTCCTGGGATCTCTACTAAGATGTTGGCAGCCCG	RefSeq	chr18	+	14337422	14342524
CUST_26953_PI430048170	0.000433363	4.25376	5.95071	6.25922	5.93002	P	P	P	3.86175	4.04671	3.98328	A	A	A	CUST_26953_PI430048170	0	Noncoding	GGACTGCAATTCACAAGAACAGTATATCCTGGTGATTCCTCAGAACAGAACAGACTCAAA	RefSeq	chr14	-	55781134	55796674
CUST_96677_PI430048170	0.000505985	2.32632	8.0419	7.7912	7.77277	P	P	P	6.49678	6.74274	6.71578	P	P	P	CUST_96677_PI430048170	0	Noncoding	GGACTGATCAAAAGAGATGTGAAGCTGGCCACGTTTATTGAAAAAGCAGCTTCTTCTGTG	lncipedia	chr17	-	3619255	3619913
CUST_77783_PI430048170	0.0084066	0.375494	3.78189	3.14155	3.46705	A	A	A	4.74686	4.96427	4.97802	P	P	P	CUST_77783_PI430048170	0	Noncoding	GGAAACACACAGCACCATCTGTGAATGATTCTTGCCTCACTGAACCAGAATCTAGTAAGA	lncipedia	chr6	-	137892230	137892468
CUST_57274_PI430048170	0.00267102	2.25612	10.4554	10.5641	10.1976	P	P	P	9.30992	9.2704	9.1335	P	P	P	CUST_57274_PI430048170	0	Noncoding	CAAGGAGCAGAAAATCATTGTGAAAGTGTTGAAAGCACAAGCAGGGAGTCAGAAAGCTAA	lncipedia	chr11	-	17137975	17138265
CUST_98856_PI430048170	0.0473584	2.32861	8.87311	8.89287	8.08576	P	P	P	7.42261	7.44209	7.46523	P	P	P	CUST_98856_PI430048170	0	Noncoding	GATGACAAGATATGGACAACTAAGTGAGAAGGTATCACAACTAGGTTTAATAGAAATCCT	lncipedia	chr5	+	76280955	76281267
CUST_48_PI430057613	0.00119238	0.379928	6.2695	5.96819	6.09845	P	P	P	7.54336	7.55488	7.43964	P	P	P	CUST_48_PI430057613	0	Noncoding	AAGAAGTTTTTAGTAAACTGTAGCTGGTATCAGGGATCAGATCAGCGGACACGCCCATTC	lncRNAdb	chr8	NA	14307165	140635615
CUST_64541_PI430048170	0.019972	2.12103	11.9213	12.0336	11.4542	P	P	P	10.8256	10.7386	10.6482	P	P	P	CUST_64541_PI430048170	0	Noncoding	AGACGATGTGTGTAACATTCACCTGGCTGTAAACTTCCTGATGTCACTGCTCACGGAAAA	lncipedia	chr19	+	19768730	19768989
CUST_104396_PI430048170	0.0348826	6.785	6.36217	6.29221	6.47261	P	P	P	4.37825	3.43251	2.3703	A	A	A	CUST_104396_PI430048170	0	Noncoding	ATTCCTACTTCAAACCCCCAGACCTCAAATAACTGCAAGAACTACTTGACTGAGGTTCGT	lncipedia	chr13	-	18816717	18871967
CUST_66605_PI430048170	0.0249	4.39835	4.63375	4.78528	6.05894	P	P	P	2.60259	3.6687	3.04971	A	A	A	CUST_66605_PI430048170	0	Noncoding	TTGCCATTTGATCTTCAAACACTGATTTCACGTTTCTTTTTCAGCACACCAAATGAAAAG	lncipedia	chr2	-	135907243	135914866
CUST_101390_PI430048170	0.00841299	2.40703	5.20468	4.83352	4.63609	P	P	P	3.57412	3.29789	3.97745	A	A	A	CUST_101390_PI430048170	0	Noncoding	CAGGGTTAAAAAGCATCTTTTATCAGAAAACTCTTATGATATTGTCTACCAATGGGTCAG	lncipedia	chr15	+	45430610	45431325
CUST_69492_PI430048170	0.0019048	6.20673	6.21753	5.89373	6.21422	P	P	P	3.42542	3.08163	3.84008	A	A	A	CUST_69492_PI430048170	0	Noncoding	TGAGGGCACATCTCAACACAGCTCACTGATCAGACTCAGCAATTCCATTCTGCATCTTTT	lncipedia	chr18	+	14252040	14253257
CUST_62246_PI430048170	0.0151526	3.23584	8.31995	8.35821	7.60896	P	P	P	6.30325	6.53952	6.46768	P	P	P	CUST_62246_PI430048170	0	Noncoding	GAGATGCCAATTCAAGTCCAAACCTTTATTTGCCAAGTTTTCTTAGAATGACTTTTACCA	lncipedia	chr15	+	78734160	78736819
CUST_22602_PI430048170	0.00443091	2.97768	7.12685	7.00003	6.77458	P	P	P	5.04856	5.38268	5.69702	P	P	P	CUST_22602_PI430048170	0	Noncoding	GAATCGGTTGTTCTAGAACTAAAGAAGGGAAATGACAATCCGTCTCTTTAGACCTTAGAG	ENSEMBL_GENCODE	chr10	+	13682521	13684874
CUST_89066_PI430048170	0.00629765	2.61314	6.76482	6.58497	6.77182	P	P	P	5.34367	5.01688	5.5603	P	P	P	CUST_89066_PI430048170	0	Noncoding	TGCAGTTAAATCTTCAACAACCTTCTGCAGCAGCGTGATGTCTCTGCTTTTATGTCTCTG	ENSEMBL_GENCODE	chr18	+	24402153	24402714
CUST_116055_PI430048170	9.76725e-07	6.60417	4.85422	4.72193	4.80268	P	P	P	1.99923	2.13351	2.07589	A	A	A	CUST_116055_PI430048170	0	Noncoding	GAATTTTCACTTTGGAAATTAACTGCTTTGGACCAGGAAGAAGCGCTGAGCCTAGAAAGG	lncipedia	chr15	+	72786499	72792897
CUST_25448_PI430048170	0.00468208	0.396128	5.9094	5.76613	5.79988	P	P	P	6.98916	7.06613	7.39839	P	P	P	CUST_25448_PI430048170	0	Noncoding	CCACTGAAGTCTTCAGCAAAATCAGAATAATGAACATGTGTCAATCCCAAAAACTTCTAT	ENSEMBL_GENCODE	chr12	+	90293323	90296247
CUST_39031_PI430048170	0.000993361	7.4026	10.6893	10.7904	10.8244	P	P	P	7.60483	8.03831	7.96413	P	P	P	CUST_39031_PI430048170	0	Noncoding	CCCAAAGTAATGCTGCTAACCTACTATCTGTCAGTTTCCTCAGTGCTTTGAAGATTTTTC	ENSEMBL_GENCODE	chr4	-	128567972	128570531
CUST_80212_PI430048170	0.0316698	3.37056	7.25639	7.18072	6.25472	P	P	P	5.1429	5.31226	5.16973	P	P	P	CUST_80212_PI430048170	0	Noncoding	AATTCTATTTGGGCAAGAGATGTACTATGTATACAAAGCAAAGAACAACACAGTGACTCC	lncipedia	chr8	-	121380136	121380465
CUST_93724_PI430048170	0.0197836	0.483809	4.29664	4.85263	4.6176	P	P	A	5.59973	5.68326	5.67814	P	P	P	CUST_93724_PI430048170	0	Noncoding	GAGGTTTCACTTCTTGTCCACACAAGACTTTAATAAAATGTGGCATCTAACTGAATAAAG	ENSEMBL_GENCODE	chr22	-	45604432	45605621
CUST_76904_PI430048170	0.0088164	2.12884	8.69686	8.71387	8.68466	P	P	P	7.3905	7.68788	7.72429	P	P	P	CUST_76904_PI430048170	0	Noncoding	GTCTGTGATTTCATAGTACCCACCTCTGAAATAAGACTCTGTCTACAATTAAAAACAAAG	ENSEMBL_GENCODE	chr6	+	16764346	16766883
CUST_47749_PI430048170	6.16846e-06	4.29972	9.20206	9.30178	9.36583	P	P	P	7.18365	7.10485	7.2685	P	P	P	CUST_47749_PI430048170	0	Noncoding	ATCATTCGTTTTCCTGAGGTGTCTCCAACAAATCCTGGCTGGATGCACTGTATGTGTTAT	RefSeq	chr18	-	56083355	56137536
CUST_115517_PI430048170	2.05907e-05	9.45683	5.55567	5.47455	5.29725	P	P	P	2.14557	2.16978	2.29549	A	A	A	CUST_115517_PI430048170	0	Noncoding	TGCAGAATGAAACCTGTTTTTCATCCAGAAGCACTGCTGACTGTTTGGTGGTTGCTGTTG	RefSeq	chr2	-	94755325	94761184
CUST_104717_PI430048170	0.00163486	0.419843	3.81859	4.11881	4.23056	A	A	A	5.12965	5.46164	5.34428	P	P	P	CUST_104717_PI430048170	0	Noncoding	GGTTTGGATACATCCCTATCCTTTTTAGCAATCAGTTTGAAAATCTGTAGAAACTTAGAC	lncipedia	chr2	+	169808476	169810602
CUST_118399_PI430048170	0.00449873	2.43884	5.65075	5.15985	5.65563	P	P	P	4.04984	4.14788	4.43551	A	P	A	CUST_118399_PI430048170	0	Noncoding	GGGTGAACTGTATTCATCCAAGGCAGGAAAAGATTACCATACAAAATAAACTTTATAGGA	lncipedia	chr1	+	89763544	89769903
CUST_66184_PI430048170	8.18556e-08	14.5706	6.13918	6.03805	6.08981	P	P	P	2.27544	2.17221	2.22434	A	A	A	CUST_66184_PI430048170	0	Noncoding	ACATCTCAACACAGCTGACTGATCAGACTCAGCAATTCCATTCTGCATCTTTTCTGATCA	lncipedia	chr2	-	94787723	94788654
CUST_20422_PI430048170	0.000154779	2.6912	9.7552	9.58331	9.61477	P	P	P	8.23169	8.17324	8.26788	P	P	P	CUST_20422_PI430048170	0	Noncoding	CGTGTGAGCAAGTCAAATTTCTGATGTTTCCCTGGATGACAAGATGTTTTCTTTATTAAA	ENSEMBL_GENCODE	chr7	+	157868538	157869154
CUST_118359_PI430048170	0.00182626	0.372092	7.095	7.1578	7.18152	P	P	P	8.63387	8.39757	8.66829	P	P	P	CUST_118359_PI430048170	0	Noncoding	CTGCCTTTCTGCCAGGATCACATCACTGGAAGCTCCATGACTCTCTTTTTGTAAAAGAAA	RefSeq	chr1	-	70852352	71047808
CUST_61692_PI430048170	5.06304e-05	2.0527	5.42708	5.31	5.39275	P	P	P	4.41956	4.28831	4.30841	A	A	A	CUST_61692_PI430048170	0	Noncoding	GATTGTGGACAAGTGATGGCGCTTTTTGTAAAATTGTGTATGTGTTTACCTCAAGTAGTG	lncipedia	chr15	+	32669878	32671699
CUST_71775_PI430048170	0.000500213	2.23781	6.6368	6.3753	6.41144	P	P	P	5.19138	5.40083	5.35101	P	P	P	CUST_71775_PI430048170	0	Noncoding	TGGGGTCCAGGTAAGAAAACTCTTTAAGCATGATTTTCCCATCTGTTTAATTTCTTATGC	lncipedia	chr21	+	34180721	34298830
CUST_66522_PI430048170	0.00417396	3.31694	5.64083	5.57075	5.34023	P	P	P	3.96685	3.39287	3.94902	A	A	A	CUST_66522_PI430048170	0	Noncoding	AAGACCTGGTTTCACATTTTATGTTCTTTTTCCTGTGCAGGCTGGGAAAGGGTTTCTTCT	lncipedia	chr2	-	130034787	130035436
CUST_110044_PI430048170	0.0232821	2.0356	11.9746	12.0369	11.495	P	P	P	10.9038	10.802	10.7798	P	P	P	CUST_110044_PI430048170	0	Noncoding	ATGATCAGAAAAAGAAGGAAGCCAAATAGAAAGGTACCTGGGTTCAACAGAAGCACCAGC	lncipedia	chr15	-	78863246	78863729
CUST_67316_PI430048170	0.00113326	2.39881	8.62985	8.48866	8.36201	P	P	P	7.25281	7.27994	7.17106	P	P	P	CUST_67316_PI430048170	0	Noncoding	GATACAAGCAATACAAGTACTAAGGTTTCATCTTTTGGAGTTAGAAAAGGTAAGCAGGAA	lncipedia	chr15	-	37094515	37096191
CUST_66085_PI430048170	0.0153844	2.87506	11.0827	11.0831	10.4865	P	P	P	9.389	9.43772	9.33086	P	P	P	CUST_66085_PI430048170	0	Noncoding	ATGTTGTAGCCCACTTCCACTACGTCTTATTAATAGGAGCCATATTCACTATTATAGGGG	lncipedia	chr2	-	85068808	85069031
CUST_94656_PI430048170	0.0343537	2.65229	8.09587	8.27237	7.37512	P	P	P	6.65089	6.5441	6.4678	P	P	P	CUST_94656_PI430048170	0	Noncoding	CAGAAACTTTTTGGATACTATCTATGTCTCTGAAAAAGGAATAGTTCAGCAGTCTGATGA	lncipedia	chr11	+	41538433	41538986
CUST_74055_PI430048170	0.00641752	2.05576	11.2309	11.3395	11.5138	P	P	P	10.5836	10.1006	10.2522	P	P	P	CUST_74055_PI430048170	0	Noncoding	ATCCAACAAGCGTCTCTTGCTCTCCTGCTTCCTTCTGTCTCTTTGCCCCCTCAGATCCTG	lncipedia	chr4	+	932486	948510
CUST_3375_PI430048170	0.00186146	2.10516	6.28453	6.60883	6.59151	P	P	P	5.24213	5.59574	5.42609	P	P	P	CUST_3375_PI430048170	0	Noncoding	CTGGGGACTGCATGTATCCCACAGGATGTTAAAAAATTGAGAAAATGTTATTTCATGATC	RefSeq	chr6	-	13469269	13472063
CUST_18649_PI430048170	0.000297022	2.41496	11.1128	11.0562	11.0993	P	P	P	9.87911	9.73204	9.83781	P	P	P	CUST_18649_PI430048170	0	Noncoding	TGTCTGTCTTCCCCAGCGCTCACGGGGAAAAATTAAAAATACGAACTAAAAAATTCAAAA	ENSEMBL_GENCODE	chr6	-	45421079	45422005
CUST_76902_PI430048170	0.0119674	3.17969	6.97425	6.50569	6.77905	P	P	P	4.62438	4.94999	5.55721	P	P	P	CUST_76902_PI430048170	0	Noncoding	TGTGTCCATTAACACCCAAAGATAACCAGTGTTGTTTAGTAGTTCTTTGCGTATTTTCTT	lncipedia	chr6	-	16666967	16761456
CUST_78855_PI430048170	0.00933454	2.39099	7.74444	7.87103	7.34263	P	P	P	6.32525	6.51883	6.38546	P	P	P	CUST_78855_PI430048170	0	Noncoding	ATCAGGATCAATTATAACGACAGATATGATGAGATTCCCCATCACTGGGGAGGCAACGTC	lncipedia	chr7	-	97200707	97201483
CUST_103027_PI430048170	0.000949446	2.25854	5.87331	5.95665	5.63091	P	P	P	4.59932	4.5531	4.79063	P	P	P	CUST_103027_PI430048170	0	Noncoding	AGAGGAAGAAGTACGACATCCCCAAATACCTGTGCTGTAAGATCAGTTTTGAGCTGATGC	lncipedia	chr2	+	177177694	177178255
CUST_123454_PI430048170	0.0120455	2.34111	4.13452	4.76292	4.26643	P	P	P	3.12188	3.05945	3.36155	A	A	A	CUST_123454_PI430048170	0	Noncoding	GGAGCTCTTGTGTGGGTTTAAAGCTATGAAGTGTATTCACATTGTGAAGTTTTAATTATC	lncipedia	chr5	+	58857301	58859392
CUST_45185_PI430048170	0.00199892	2.42857	7.91598	8.19048	8.16811	P	P	P	7.0103	6.56696	6.83859	P	P	P	CUST_45185_PI430048170	0	Noncoding	TGGATGGCTGAGTTTTGGATGACTGACAGCCCCAGATCCTGCTCCAGGTTCCTTCCTCAG	ENSEMBL_GENCODE	chr12	-	7129079	7130252
CUST_11112_PI430048170	0.00145324	2.29698	9.02885	9.06407	8.85332	P	P	P	7.82339	7.93269	7.57701	P	P	P	CUST_11112_PI430048170	0	Noncoding	AGAGGCAGGGGCCAATAAATAAATTAAGGCGGGATATTTGGAGTTATTTGGTTGTAATAA	ENSEMBL_GENCODE	chr1	-	89820174	89820868
CUST_33827_PI430048170	0.00379211	2.27824	7.57142	7.5356	7.53575	P	P	P	6.39659	6.20134	6.46833	P	P	P	CUST_33827_PI430048170	0	Noncoding	GTGCAAGGCAACACATACATTTGGTCTGTGTATATACTTTGGTCTATGTATTCTGTTATT	RefSeq	chr21	+	28013362	28023209
CUST_120262_PI430048170	0.000796292	0.321051	9.11878	9.09465	8.86958	P	P	P	10.7198	10.6733	10.6184	P	P	P	CUST_120262_PI430048170	0	Noncoding	TTCACATTCTCAGGAACTCTCCTTCTTTGGCAGGATTGCTACAGTTGTGATTGGAGGAGT	lncipedia	chr14	+	94110732	94115942
CUST_107343_PI430048170	0.00166736	0.206462	4.8331	4.4498	4.33629	P	A	A	6.72903	6.83484	6.92494	P	P	P	CUST_107343_PI430048170	0	Noncoding	AATAGACTTCTACCTTGATGGAATGGGTTGGACTAACGAGGAACCACCATTACTCCAAGG	lncipedia	chr18	+	58653442	58668184
CUST_120261_PI430048170	0.000189874	0.307617	9.02967	9.06273	8.91415	P	P	P	10.6757	10.7312	10.7057	P	P	P	CUST_120261_PI430048170	0	Noncoding	TCAGCTTCACATTCTCAGGAACTCTCCTTCTTTGGCAGGATTGCTACAGTTGTGATTGGA	lncipedia	chr14	+	94110737	94115839
CUST_24887_PI430048170	0.00553387	2.4738	7.64552	7.42766	7.95718	P	P	P	6.2426	6.49005	6.41595	P	P	P	CUST_24887_PI430048170	0	Noncoding	TGATTTAAATGTGGTGTGTTGCTATGGTTCCCAGCCTTCTTGAAAGTCACAGACATGGTG	ENSEMBL_GENCODE	chr12	-	26273329	26273900
CUST_117866_PI430048170	0.0211109	2.91888	9.56	9.62218	8.9138	P	P	P	7.81847	7.88193	7.85928	P	P	P	CUST_117866_PI430048170	0	Noncoding	AATTCCCATTTCACCTGAAATGACACTAGAACTGCTGAGGCTGTGAACTTCCTAGATTGT	lncipedia	chrX	-	155978991	155979325
CUST_61720_PI430048170	0.000156312	0.440986	5.95886	5.99833	5.87942	P	P	P	7.11472	7.22434	7.03754	P	P	P	CUST_61720_PI430048170	0	Noncoding	TGAAGTTTGACGGGCTGCCATGTGCTAGACTACCTAAGATACTCTTAACTGAACCATAAA	ENSEMBL_GENCODE	chr15	+	36046082	36049529
CUST_31256_PI430048170	0.000388494	0.458147	8.12851	8.14576	8.01191	P	P	P	9.14836	9.35262	9.15784	P	P	P	CUST_31256_PI430048170	0	Noncoding	GACGGGGCAAACAGATTCTTGATATCATTTAGACACTCAATTTTGAACTTCTCTGGTTTC	ENSEMBL_GENCODE	chr18	+	2920966	2921685
CUST_94716_PI430048170	0.000126174	0.439819	6.73277	6.85594	6.65601	P	P	P	7.92171	8.01977	7.86091	P	P	P	CUST_94716_PI430048170	0	Noncoding	GAATTTTAGGTGGTTAAATAAACTTGGATCGGCTGTAATCCATCAGGAATCCACTACAAA	lncipedia	chr6	-	154199828	154214313
CUST_50952_PI430048170	0.0221127	3.08428	8.44665	8.43507	8.2657	P	P	P	6.31679	7.23925	6.55948	P	P	P	CUST_50952_PI430048170	0	Noncoding	GGCCCAGAAGGTGGCCCACAAACCAATGTTAATTCTATGCATTGTCAAATCTTTGCTCTT	lncipedia	chr4	-	17630923	17632439
CUST_16913_PI430048170	1.84635e-05	2.89876	8.27369	8.28322	8.40466	P	P	P	6.73429	6.83918	6.78361	P	P	P	CUST_16913_PI430048170	0	Noncoding	TGAGATGAAAGAGGTGATGAGTTTGCGGCAATGTAGGAATGAAATACATCGGCCACAGGA	ENSEMBL_GENCODE	chr5	+	675826	676616
CUST_27410_PI430048170	0.0152055	4.89763	5.9183	5.92872	6.32497	P	P	P	3.12148	4.38771	3.52593	A	A	A	CUST_27410_PI430048170	0	Noncoding	TTACAGTTGGCTTGGTCAAGTCAGTGTTCAAACTATCTCCTGCTCTTTCAAGGGGATCTG	ENSEMBL_GENCODE	chr14	+	100906044	100907101
CUST_93430_PI430048170	0.00437481	4.33649	6.57355	6.38479	6.32121	P	P	P	3.91854	4.31279	4.62507	A	A	P	CUST_93430_PI430048170	0	Noncoding	GGAGTGAATGATATTGCTGTCATTTCTCAGCAAATCATAGTGATAAAAAATGTGGCAGTT	lncipedia	chr14	+	61019535	61031039
CUST_126038_PI430048170	0.000212157	2.51144	10.4088	10.5535	10.6486	P	P	P	9.11827	9.27874	9.23375	P	P	P	CUST_126038_PI430048170	0	Noncoding	TGCCAGTGGCCTGTACCATATTATGGAAAACTGTTAACTGCTTAATTGGGTAATTTTCAA	lncipedia	chrX	+	65075843	65409107
CUST_35321_PI430048170	0.000518476	2.51615	11.6578	11.5459	11.3796	P	P	P	10.1544	10.2937	10.1505	P	P	A	CUST_35321_PI430048170	0	Noncoding	CTACACAACACACCCACCTCAACTAGAGCTTTGCTTTAGCTTGGTGTAATTTTTGGAAAA	ENSEMBL_GENCODE	chr9	+	33174170	33174295
CUST_115448_PI430048170	0.0055259	2.1801	8.74796	8.48575	8.54808	P	P	P	7.19333	7.49964	7.68653	P	P	P	CUST_115448_PI430048170	0	Noncoding	CATACTGCTTTAATCGTGGCCAAGGCATCTAGTCTTGTTGAAATATTAAAATCAGTGATT	lncipedia	chr2	-	160275398	160277372
CUST_59410_PI430048170	0.00147192	0.457864	5.68247	5.65065	5.4906	P	P	P	6.7226	6.90354	6.56605	P	P	P	CUST_59410_PI430048170	0	Noncoding	ATGTCTAAATTGTTTAATTTGAACAGTGCGTTCAGACGCAAGACAAATTCGCGCTTGCAT	RefSeq	chr12	-	98512972	98516226
CUST_42661_PI430048170	0.000729533	2.49784	8.76491	8.90812	9.09474	P	P	P	7.58315	7.72174	7.51193	P	P	P	CUST_42661_PI430048170	0	Noncoding	ATGTAACTGCACATAGAAGCCAGTCCTGAAAAGAAGCAAGCCGGCTGAAGTTATCTGCAA	ENSEMBL_GENCODE	chr15	+	38004746	38025018
CUST_59748_PI430048170	0.0177989	0.413217	2.92419	3.27313	3.6468	A	A	A	4.32392	4.27673	5.02973	P	P	P	CUST_59748_PI430048170	0	Noncoding	TTACCCACATTTGGATCTACGGACCTGCAAGGATGAAAAGAATATGTCTAAGATCCGGCC	lncipedia	chr12	+	126145505	126171665
CUST_75299_PI430048170	0.029524	0.365868	4.42516	3.63154	3.5997	P	A	A	5.44552	5.3455	5.3748	P	P	P	CUST_75299_PI430048170	0	Noncoding	AGAGAACCAGAAGGGTCATCCCATGCCTTAGTAGTAGAGCTAAACTATCCCAGAATAGAG	lncipedia	chr5	+	14620019	14621313
CUST_68099_PI430048170	0.00198826	2.10862	10.5162	10.5877	10.7331	P	P	P	9.57252	9.51249	9.53096	P	P	P	CUST_68099_PI430048170	0	Noncoding	AATATGGCCCGAGCAGTGTTTGGTAAGTAATTGGAGGTGGGTGTACTTACTTTGTTTTTT	lncipedia	chr8	+	73976218	73979021
CUST_56841_PI430048170	0.0282294	2.32516	8.65103	8.93019	8.1578	P	P	P	7.47691	7.42261	7.28357	P	P	P	CUST_56841_PI430048170	0	Noncoding	AAGAAAAATGCCAGGAACAGATTGCCCAGAGATGCAGACTGTCCTTTCTGCAAGCTTCTA	lncipedia	chr10	-	111498190	111498941
CUST_43218_PI430048170	0.000350234	2.31523	10.9727	10.9233	10.8173	P	P	P	9.56165	9.70658	9.80567	P	P	P	CUST_43218_PI430048170	0	Noncoding	CTTGCCATTTAGCCACTGTTACTGATAATTTGGATGGAAAAGAAAAATAAATTATATCAC	ENSEMBL_GENCODE	chr12	-	25944857	25958578
CUST_124122_PI430048170	0.0211067	3.11644	9.91107	10.1124	9.26323	P	P	P	8.22679	8.20485	8.05895	P	P	P	CUST_124122_PI430048170	0	Noncoding	TGGAATACAAGGTTGCAACTTTTTCTGGTATCTATAAGAAGCTCATTGGAAAGGATGTTA	NONCODE	chr6	-	63612760	63612903
CUST_71380_PI430048170	0.00143444	0.374222	3.71394	3.39736	3.82371	A	A	A	5.20361	5.09023	4.91376	P	P	P	CUST_71380_PI430048170	0	Noncoding	AACAGGAGATGTTTGGTAAATGTGCAGTCACGTTCATGACTCTTCAAATTTCTTTTGAAA	lncipedia	chr20	+	53846713	53852443
CUST_98207_PI430048170	0.0276651	2.35829	11.6875	11.7585	11.0593	P	P	P	10.3657	10.3162	10.2024	P	P	P	CUST_98207_PI430048170	0	Noncoding	GTCATCACAGCAGTGACTTGATTCAGTTTCATTCAGCTCTGTATGGACTCCTAGTCCATA	lncipedia	chr14	-	67652299	67652614
CUST_22498_PI430048170	0.000463641	0.42775	10.113	9.9328	10.2218	P	P	P	11.2097	11.4303	11.3093	P	P	P	CUST_22498_PI430048170	0	Noncoding	TGAGCCTGGCCATTACATTCAGTTCTGCTGTCTTTAAAATAAAAACCCTGGATTAAGTCA	ENSEMBL_GENCODE	chr10	-	4201141	4243912
CUST_24897_PI430048170	0.000215093	16.3894	6.80315	6.72829	6.70211	P	P	P	2.90006	2.59125	2.61947	A	A	A	CUST_24897_PI430048170	0	Noncoding	ATCTTCATTCTAAAGCTACCCGGCAAGAACAGTTCCACCTAAGTATGAAACTGAGTCCTG	ENSEMBL_GENCODE	chr12	-	27547050	27552773
CUST_58789_PI430048170	0.00258827	2.72256	6.85668	6.73537	6.3763	P	P	P	4.92365	5.22785	5.4722	P	P	P	CUST_58789_PI430048170	0	Noncoding	TTACTGATAATTTGGATGGAAAAGAAAAATAAATTATATCACCTCTCATCTTCAGTGTAT	lncipedia	chr12	-	25944843	25958563
CUST_11110_PI430048170	0.0211514	3.3562	5.73885	5.46311	5.89938	P	P	P	3.23406	4.28642	4.16326	A	A	A	CUST_11110_PI430048170	0	Noncoding	GACATTACTGATCAACACATCCTGTTTAGCAGTAGTGACAGAACATTGTGCATTAAAAAT	ENSEMBL_GENCODE	chr1	+	89629725	89676386
CUST_25301_PI430048170	0.0137423	0.223787	2.7811	2.61687	3.86448	A	A	A	4.88715	5.54334	5.55415	P	P	P	CUST_25301_PI430048170	0	Noncoding	TCATCTAAGGGCTGTATGTACATCATTTTGGGGAAGGTAGAGATTGAAGGAGGAAGAACA	ENSEMBL_GENCODE	chr12	-	68332888	68335781
CUST_73386_PI430048170	0.00317541	0.48683	5.98848	5.58866	5.77043	P	P	P	6.65958	6.7566	7.04621	P	P	P	CUST_73386_PI430048170	0	Noncoding	GATGAGCATTGACTACACTATGAAGCCTCTCTGTTTAAGATACAGGAGAAACTTAGCTCC	lncipedia	chr3	-	117992496	117994310
CUST_56059_PI430048170	0.0138889	3.36297	7.87017	7.88836	6.99945	P	P	P	6.10267	5.93943	5.5845	P	P	P	CUST_56059_PI430048170	0	Noncoding	GTGTTCAATGATTACAATTTTGTTTTTACCGGTTTTGCAAAGCAGCAATGACAACAGAGA	lncipedia	chr10	+	20350048	20351100
CUST_125755_PI430048170	0.0117215	2.73291	6.17181	6.26439	6.43217	P	P	P	4.44303	4.82965	5.16664	P	P	P	CUST_125755_PI430048170	0	Noncoding	GTTTAAAGGACTATACATGTAAGTCTGCAGGCAATAAAGGCTGTTGTGAAAAGTAGAAAA	NONCODE	chr9	-	89005771	89010400
CUST_64397_PI430048170	0.0322305	3.51568	10.4907	10.5267	9.53616	P	P	P	8.43589	8.39836	8.47707	P	P	P	CUST_64397_PI430048170	0	Noncoding	TCATAGCTTTAATCCAAGCATATGTTTTTACACTACTAGTGAGCCTCTATCTACAAGACA	lncipedia	chr19	+	12506248	12508030
CUST_114872_PI430048170	0.0165602	2.67186	10.1417	10.2552	9.59032	P	P	P	8.62022	8.68237	8.50932	P	P	P	CUST_114872_PI430048170	0	Noncoding	GATAGGAAAGAAAAACTTATGCAGGAAGGAAAATTGGATCGAACAGTTCACCTATCATAT	lncipedia	chr4	+	43898456	43899351
CUST_116445_PI430048170	0.0301228	2.24387	6.07199	6.01274	6.14561	P	P	P	4.43418	5.05966	5.14317	P	P	P	CUST_116445_PI430048170	0	Noncoding	CAGGGGGCTATGAACCACCTTCTGGATAAAGGTGGTGCTGGAGAAATAAAGCTTTGAAAA	RefSeq	chr12	+	29389293	29464930
CUST_101722_PI430048170	0.0245116	2.00841	10.0961	10.1642	9.6169	P	P	P	9.00148	9.01853	8.89515	P	P	P	CUST_101722_PI430048170	0	Noncoding	AACGACAAGATGGTAGAGACAAAAGCTGAGAATTCATCCACTCCTGAGGCTGAGCAGAAT	lncipedia	chr2	-	132488553	132489088
CUST_48652_PI430048170	0.00838615	0.365129	4.43542	4.73748	4.0147	P	P	A	6.02169	5.92827	5.66451	P	P	P	CUST_48652_PI430048170	0	Noncoding	TGTCTCACCTACTCTGTGCTCACCTGTTTCTGGATGAAGCACGGTGACATCTGTTTTATT	lncipedia	chr3	-	64453130	64459326
CUST_16812_PI430048170	0.0121494	2.0757	5.79926	5.63513	5.414	P	P	P	4.4384	4.90364	4.29993	A	A	A	CUST_16812_PI430048170	0	Noncoding	TACATGAGATTCAAAGTTTTTCAGTATGCAATGCTGAACGTTCACACTATGGTTGCAAAA	RefSeq	chr4	-	182138659	182144515
CUST_28965_PI430048170	0.023871	2.4355	7.37146	6.87284	6.66697	P	P	P	5.64508	5.73716	5.7669	P	P	P	CUST_28965_PI430048170	0	Noncoding	AACCTGATCATTATCATACTTATGCCTAGACACAAGAGAGGCAATAAACTAATCTAAGTG	ENSEMBL_GENCODE	chr16	-	22612543	22613483
CUST_99913_PI430048170	0.00310824	0.452643	7.88227	8.0718	7.69741	P	P	P	9.08751	9.07863	8.93526	P	P	P	CUST_99913_PI430048170	0	Noncoding	CCAGCAAGGGATAAATACTGCGCACAGTAGACTTCATTTCTTTTAAGTAACATGCCAAAT	lncipedia	chr1	+	192575772	192576766
CUST_7561_PI430048170	0.00351663	0.336951	4.45709	4.40771	4.61884	P	P	P	5.76864	6.11877	6.26843	P	P	P	CUST_7561_PI430048170	0	Noncoding	GGCGGGCATGTGGGGTGTCTGGAGACGCCAGGCAGCCCCACAGCCTCAGACCTCGGGCAC	RefSeq	chr19	-	42133444	42133513
CUST_125753_PI430048170	0.0170126	2.36048	7.09543	7.52921	6.87879	P	P	P	5.95917	6.04994	5.84747	P	P	P	CUST_125753_PI430048170	0	Noncoding	ATGAAGATGATTGAGCAGCACAATCAGGAACACAGCCAAGGGAAACACAGCTTCACAACA	NONCODE	chr9	+	87844191	87844699
CUST_98089_PI430048170	0.00588086	2.41841	6.41856	6.06972	6.21835	P	P	P	4.84634	4.71488	5.28187	A	A	P	CUST_98089_PI430048170	0	Noncoding	TGTAAGTGAAGTAACTTCTGGCCATGGTTCATTTCAGACCTCTCTAAAGCCTGCAATTAC	lncipedia	chr12	+	27066029	27066285
CUST_98832_PI430048170	0.00699534	2.40156	6.44382	6.16191	6.19384	P	P	P	4.64722	5.13049	5.18812	P	P	A	CUST_98832_PI430048170	0	Noncoding	TATTAAGTGGTACAGAGTGTTGTGTGGATCCAGAGGGAGAAAAAGGCCATTGGTGTTAAT	lncipedia	chr5	-	39417552	39424870
CUST_54373_PI430048170	0.00187186	2.22737	5.1101	5.06318	4.88397	P	P	P	3.80348	4.07064	3.70123	A	A	A	CUST_54373_PI430048170	0	Noncoding	ACGTAACAAGAATCCAAAGAAAACAAAATGGTGGTATCATGAAGACGCTTGTTGATGCCA	lncipedia	chr1	+	96418593	96418933
CUST_116028_PI430048170	0.025144	3.05252	8.05347	8.12585	7.22613	P	P	P	6.17221	6.40606	6.14306	P	P	P	CUST_116028_PI430048170	0	Noncoding	TGTTGAGCCCAGTGAAGATCTAAGAGAATCCTGGCTATTAAAAGATGCCAGCATTTTGAA	lncipedia	chr15	-	89687936	89688243
CUST_18772_PI430048170	0.00221777	0.483255	5.80074	5.7366	5.59275	P	P	P	6.577	6.75488	6.93168	P	P	P	CUST_18772_PI430048170	0	Noncoding	AAACTTTGCTTCAGGCTGGGTAGTGGTAGAGGTTTGAATTAAAATGTTTTCCTGTCAGTA	RefSeq	chr6	-	71407864	71420745
CUST_5059_PI430048170	0.0208365	3.07395	10.7962	10.8313	10.099	P	P	P	9.00014	9.0337	8.94204	P	P	P	CUST_5059_PI430048170	0	Noncoding	TGGAATTAACAATGTAACCATCTGAAAGCAACTTTTTTGGTGTCTCAGATGAGTAACTGC	RefSeq	chr8	+	101368892	101369595
CUST_80158_PI430048170	0.000106956	2.94368	6.75908	6.63923	6.62062	P	P	P	5.23909	5.08384	5.01809	P	P	P	CUST_80158_PI430048170	0	Noncoding	GGAGAGTTCAACAATTTTTATGAATTTCTAATCCAACCTCATCATCCTATGGGAAACAGA	lncipedia	chr8	-	103498191	103499555
CUST_28160_PI430048170	0.0169102	3.00153	5.04265	4.69211	5.20551	P	P	P	3.47249	3.79611	2.78567	A	A	A	CUST_28160_PI430048170	0	Noncoding	GGAGACTCGGGAACTAAAACAATCAATTCCCCTGAGCAATAAAATTATGGACAGTGAACA	ENSEMBL_GENCODE	chr15	+	74202705	74221557
CUST_99061_PI430048170	0.0133076	2.85637	8.74066	8.77142	8.16649	P	P	P	7.019	7.16186	7.02718	P	P	P	CUST_99061_PI430048170	0	Noncoding	ATACAACCGATAGCTCGTCATTGACATCTACCAAATTCTGTCTACAGCCCAATTCAGGAA	lncipedia	chr7	+	106125370	106126700
CUST_5057_PI430048170	0.0482621	2.8223	6.46421	6.51773	5.49121	P	P	P	4.79397	4.64445	4.75143	P	P	P	CUST_5057_PI430048170	0	Noncoding	GGGCAGGGAAGATACTTATGTGTGGAAGATTATTGCTCTAATTTGAGTGAAATAAAAGTT	RefSeq	chr13	+	50172017	50173615
CUST_124395_PI430048170	6.81376e-05	0.489457	12.5456	12.5547	12.4684	P	P	P	13.5683	13.5268	13.5671	P	P	P	CUST_124395_PI430048170	0	Noncoding	ATCATGACCATTCTGCTCACCATCATCATCCTAGTGTTGATCTTCCCAGTCTGTCGATAG	NONCODE	chr6_GL000251v2_alt	-	1234572	1234992
CUST_58801_PI430048170	0.00343262	2.23711	6.26642	5.82998	6.18041	P	P	P	4.92253	4.79729	5.09278	P	P	P	CUST_58801_PI430048170	0	Noncoding	ATGGTTCATTTCAGACCTCTCTAAAGCCTGCAATTACCTCTCAGTGTATGTGAATTTTTT	lncipedia	chr12	+	27046151	27066343
CUST_19337_PI430048170	0.0089781	3.24085	6.29492	5.94724	6.24591	P	P	P	4.01678	4.44047	4.84719	A	P	A	CUST_19337_PI430048170	0	Noncoding	GAGTAGCCAAAATGCTGTGGCATTCTTAGAAATGAAGAAAGAACTGAACTGATAAGACAA	ENSEMBL_GENCODE	chr6	-	167994172	167997077
CUST_92390_PI430048170	0.0126237	2.57488	8.22592	8.14788	7.60558	P	P	P	6.63891	6.53514	6.77704	P	P	P	CUST_92390_PI430048170	0	Noncoding	CAATTCTAACAGAGATACCTCACATTGTTTCTCAGAAGCAAATGTCAGACAGAGCCGAAA	lncipedia	chr10	-	93881292	93881938
CUST_38763_PI430048170	0.000369936	2.08587	11.4643	11.3464	11.5198	P	P	P	10.2616	10.3845	10.4981	P	P	P	CUST_38763_PI430048170	0	Noncoding	TAGCCTATCTTGCCATTTAGCCACTGTTACTGATAATTTGGATGGAAAAGAAAAATAAAT	ENSEMBL_GENCODE	chr12	-	25944857	25958578
CUST_79636_PI430048170	0.00295726	0.480088	9.21945	9.12027	9.19446	P	P	P	10.1772	10.3973	10.1226	P	P	P	CUST_79636_PI430048170	0	Noncoding	TATATAAGTTGGCATGGCAGGGACAATGGTGGGCAGTTGCTCTTACATGAGCTAAGTTTG	lncipedia	chr8	+	22589282	22594195
CUST_53864_PI430048170	0.00638934	2.50624	6.48309	6.60861	6.01792	P	P	P	5.31352	5.11365	4.70571	P	P	A	CUST_53864_PI430048170	0	Noncoding	ACTCCAAACTATTGCTATCATTGTGGTAATCACACTGCAATCATGGAACTTGATAATACT	lncipedia	chr1	-	40938103	40939763
CUST_98634_PI430048170	0.0217835	3.10773	11.0872	11.0549	10.3234	P	P	P	9.18792	9.29567	9.19288	P	P	P	CUST_98634_PI430048170	0	Noncoding	TTGAGGGCACTAACCTGTGTGTTATCCATATCAAACGTTTAACAATTATGCCAGAAGACA	lncipedia	chr3	-	25441163	25441502
CUST_104831_PI430048170	0.00466766	0.407614	5.17964	5.54384	5.14092	P	P	P	6.61155	6.66517	6.50227	P	P	P	CUST_104831_PI430048170	0	Noncoding	TTGTTAAAGGCAAAAGAGTCCCTAAAATGCCGAGGCTACTTTGCCGGGGTTCATGAAATG	lncipedia	chr8	+	24346947	24351508
CUST_66740_PI430048170	0.00993449	2.2851	6.36352	6.52595	6.9434	P	P	P	5.38115	5.59638	5.32781	P	P	P	CUST_66740_PI430048170	0	Noncoding	TAGGATGTTCTGCTGTGCCACAAGACTTAATTTATACCATTTATTAGTCTTACCAAGTAC	lncipedia	chr2	-	160337171	160338205
CUST_120617_PI430048170	0.0386857	3.04018	7.71507	7.77242	6.78911	P	P	P	5.94721	5.82078	5.88714	P	P	P	CUST_120617_PI430048170	0	Noncoding	AGAAGAACTTCAGAATGCACTACAACAGGAAAATCATATTCTAGATGGAGTCAAGTCAAT	RefSeq	chr15	+	91022621	91031139
CUST_7682_PI430048170	0.00702529	2.18321	5.31676	5.28609	5.04782	P	P	P	4.27384	3.77078	4.19264	A	A	A	CUST_7682_PI430048170	0	Noncoding	GGAAAGCTGAATAAAATGAATGAAAACTCTATACCATCATCCTCATTGAACTGAGGTCCC	RefSeq	chr15	+	25077049	25077143
CUST_103072_PI430048170	0.000266777	0.480367	5.82039	5.66475	5.78749	P	P	P	6.92061	6.70443	6.81749	P	P	P	CUST_103072_PI430048170	0	Noncoding	AATTTATATGGCCACAGAACTACAAAAGGAAATAACTATAACCTCACTGACCACAGTGCT	lncipedia	chr10	-	4235298	4243536
CUST_10132_PI430048170	0.0186982	0.427876	5.72234	5.06145	4.90682	P	P	P	6.14717	6.61069	6.68567	P	P	P	CUST_10132_PI430048170	0	Noncoding	CTATCCTTCTTAGAAGCTTTGAACTCAAAATCATGGAAAGGTTTTAAGATTTGAGGTTGG	RefSeq	chr8	+	24294039	24336099
CUST_91735_PI430048170	0.00740466	2.29965	6.49444	6.5868	6.22048	P	P	P	5.20862	5.25823	5.25475	P	P	P	CUST_91735_PI430048170	0	Noncoding	TGGCCTCATACTCTGTTATAGATAAACAAGGTAATTTTCACCTTTTGCAATGGTTCCTAC	lncipedia	chr3	-	98849356	98901171
CUST_6794_PI430048170	0.00210753	2.27016	15.0519	15.208	14.984	P	P	P	13.9172	13.9159	13.8712	P	P	P	CUST_6794_PI430048170	0	Noncoding	GAGCGTGTCATGAACCATGTCGCCTGTACTCGGATCTATGAAAAAGCACAATAAAGATTC	RefSeq	chr7	+	152436894	152443015
CUST_120433_PI430048170	0.00012156	2.31798	6.51279	6.52543	6.67155	P	P	P	5.29529	5.37632	5.40285	P	P	P	CUST_120433_PI430048170	0	Noncoding	CCAGGTATTTTGCATATGATTGATTTTAGAAAGATTTTGAAGCTGGGGTTTGTCCATGTT	lncipedia	chr15	-	45479612	45481465
CUST_48331_PI430048170	0.0147471	2.22432	8.64957	9.23138	8.76539	P	P	P	7.61882	7.8364	7.78978	P	P	P	CUST_48331_PI430048170	0	Noncoding	GTTGCTTTTACAGCCTGTATTTTGAGCTGCATCAAACCCTGTTGGAATAAAAAAGGACAT	lncipedia	chr2	-	112641935	112644003
CUST_54129_PI430048170	0.0289967	2.9144	9.88468	10.0589	9.14729	P	P	P	8.10815	8.30635	8.19194	P	P	P	CUST_54129_PI430048170	0	Noncoding	CTGTGGCCTGACCAAGAAAGAAGGCATATGCAGATTTCTACAGAAATTATAATTGAATTA	lncipedia	chr1	-	65298754	65298980
CUST_100212_PI430048170	0.0226918	2.8739	4.37291	5.29491	4.53567	P	P	P	2.87117	3.82719	2.89331	A	A	A	CUST_100212_PI430048170	0	Noncoding	AACAGTCCTCTGCGCTGAGCTTGGACTTAAAGTGGAAAGGCTTACATTTGCAGAATTAAA	lncipedia	chr6	-	2989344	2999579
CUST_97742_PI430048170	0.000458476	0.410271	4.77974	4.66355	4.62412	P	A	P	6.10582	5.9717	5.8381	P	P	P	CUST_97742_PI430048170	0	Noncoding	ACCGCAGATGGAGCAGTTGTTTCGCTACAGGAAGGAAAGGCCATGTGAAGATAAAGAAAA	lncipedia	chr10	-	89293638	89308202
CUST_27945_PI430048170	0.00020303	0.498245	4.27847	4.36882	4.43493	A	A	P	5.25335	5.43155	5.41032	P	P	P	CUST_27945_PI430048170	0	Noncoding	CTCATTTTCAAGAAGCTCATAATCTAATTGGAACACTACACATGTCAGCCCATACATATT	ENSEMBL_GENCODE	chr15	+	56248787	56249127
CUST_57576_PI430048170	0.00151587	0.418238	6.28215	6.11159	5.9959	P	P	P	7.2407	7.61552	7.29134	P	P	P	CUST_57576_PI430048170	0	Noncoding	GACTAATAGTGTCACGTGCTGATTCTGTGATGAGAACCCAATGCAGAGTTTCTCTTCCAG	lncipedia	chr11	+	60389035	60393977
CUST_6525_PI430048170	0.0356736	5.29085	5.59923	5.82051	5.53214	P	P	P	3.99667	3.01557	2.18267	A	A	A	CUST_6525_PI430048170	0	Noncoding	TTTTGGAGAACCATTATTTTGCTTCCAGTATGTTGCCGACAATGGAGGCCTGGACTCTGA	RefSeq	chr9	+	87772914	87786884
CUST_84609_PI430048170	0.00193887	3.05026	8.41635	7.91032	8.12131	P	P	P	6.25334	6.53531	6.82179	P	P	P	CUST_84609_PI430048170	0	Noncoding	CCTTGACTCTGACCAAAACCTTTGCACTGATTGATTATAGTTGTGCCAAAATTGTTCACA	lncipedia	chr12	+	27686289	27686584
CUST_94088_PI430048170	0.0210635	2.28797	6.01401	6.18891	6.05787	P	P	P	4.46637	5.12374	5.01241	P	P	P	CUST_94088_PI430048170	0	Noncoding	TAGACCAATGCAAACCAATAGAACCCAGAAAATCAAAGGAAAACACAGCATGATGTTATA	lncipedia	chr12	+	27121952	27133595
CUST_21890_PI430048170	0.0376771	3.60827	7.05642	7.6809	7.08285	P	P	P	5.64505	5.91651	4.38453	P	P	A	CUST_21890_PI430048170	0	Noncoding	TGTTTCATTTCCTGCTGGATCTGATTCAGGTCAGTGATGAAGTTCTTTGCGAGCTCAGTG	RefSeq	chr9	-	65863791	65878507
CUST_104860_PI430048170	0.0151356	2.48243	10.9095	11.0245	10.3728	P	P	P	9.51569	9.58175	9.34388	P	P	P	CUST_104860_PI430048170	0	Noncoding	TCAAAAACGACCAGTTCTTCTGTATTGGGGAAACCATGAATCCAGGTGGCATGGTTGCTT	lncipedia	chr5	+	31908360	31909186
CUST_94106_PI430048170	0.000384419	2.46637	7.36451	7.31245	7.55433	P	P	P	5.96695	6.08677	6.26599	P	P	P	CUST_94106_PI430048170	0	Noncoding	ATAACGAGGAAAACAAAGTGAAACAAAAGACTGTACCCGTGTGCTAAGAATTTATTACCC	RefSeq	chr1	-	64105322	64113791
CUST_61882_PI430048170	0.0305577	2.17908	10.3654	10.4898	9.77794	P	P	P	9.15438	9.19743	8.99784	P	P	P	CUST_61882_PI430048170	0	Noncoding	CATGGGATCATTTCCATATGAGAATCCACAAACAACTCATTGACTTGCACATCCTTTCTG	lncipedia	chr15	+	50466737	50467096
CUST_125026_PI430048170	0.00244222	5.19619	7.60851	7.84204	7.50356	P	P	P	4.89216	5.23367	5.62401	P	P	P	CUST_125026_PI430048170	0	Noncoding	GCTACCCAAGAAAAGGTTTTAAAGGTAAAAGTTATGAGTAATGTCACCACAATAAGCTCT	NONCODE	chr7	-	77193371	77194373
CUST_52207_PI430048170	0.000169328	0.223024	7.91347	7.93186	8.24281	P	P	P	10.0619	10.2211	10.3126	P	P	P	CUST_52207_PI430048170	0	Noncoding	TTCGTTGCATGACCAGAGACCATACTAAGCATGTATTAGACATCCAATAAATAGTTACTG	lncipedia	chr1	-	203212834	203218021
CUST_88352_PI430048170	0.00642106	0.38454	3.95484	3.62436	4.20606	A	A	A	5.29626	5.64113	4.9631	P	P	P	CUST_88352_PI430048170	0	Noncoding	TATATAGAAATGAGCCTATTGATGCAACAATATAAATGGCACTGAGAGGGGTGTCCAGAG	lncipedia	chr15	-	41895938	41896833
CUST_116218_PI430048170	0.00126985	2.3642	7.79091	7.84713	7.48923	P	P	P	6.50948	6.31683	6.58857	P	P	P	CUST_116218_PI430048170	0	Noncoding	ATAGATATGGCATCGATCTTTAGCCTGAGAACTCTCCAGAAATGTTAACGAGATCCTGGG	lncipedia	chr14	+	30791097	30791489
CUST_70630_PI430048170	0.00459911	0.393804	4.9028	4.56416	4.29186	A	A	P	5.6823	6.0912	6.04981	P	P	P	CUST_70630_PI430048170	0	Noncoding	TTTCGAAATGAGCATCTTCTACCAGAAAGTGTTTGAGACCAAAAGTAAAATCTCAGACTA	lncipedia	chr2	+	227813842	227815984
CUST_99548_PI430048170	0.00931677	2.10092	5.88105	6.07811	6.07982	P	P	P	4.6291	5.07867	5.08178	P	P	P	CUST_99548_PI430048170	0	Noncoding	GTTCCACTTATCTGCTGATGCCACTCTTAGTATATGACAATAAAATCCTTTCATCTGTCA	lncipedia	chr1	-	172531759	172533466
CUST_100646_PI430048170	0.00370619	2.48526	7.75211	7.72064	8.19371	P	P	P	6.85654	6.33053	6.54018	P	P	P	CUST_100646_PI430048170	0	Noncoding	TTGAGCATCTCCTCCCATGTAGAGAGTGTATATGTTTACGTCCATGTCTTTCGCCATGTG	RefSeq	chr18	-	56083355	56137536
CUST_48367_PI430048170	0.00837259	0.477367	4.13163	4.05938	4.13942	A	A	A	5.04936	5.39215	5.06408	P	P	P	CUST_48367_PI430048170	0	Noncoding	GGCATCTCGTGTGTGTTAAGATGAAACAAGATCTTAGCAAGAGAGTAATGATTTCTTTTT	RefSeq	chr15	-	100344456	100350718
CUST_22047_PI430048170	0.00103442	5.74442	9.40229	9.14424	9.14512	P	P	P	6.7917	6.35981	6.93	P	P	P	CUST_22047_PI430048170	0	Noncoding	CTGTAGGGGATTTTCCATTTAACATATTGTGATTGTGCAGTAACATTAGTCTTTGCCATT	ENSEMBL_GENCODE	chr9	+	90997054	91001871
CUST_1231_PI430048170	4.06751e-05	4.31225	10.002	10.1796	10.2593	P	P	P	7.94332	7.98144	8.19026	P	P	P	CUST_1231_PI430048170	0	Noncoding	GATCTCTACAGGAAAATCTCTTCCCTATGTCTTCTTTAGACTCTTCAAAAAGGAGAGAGA	RefSeq	chr15	+	38040392	38062340
CUST_92482_PI430048170	0.000411412	4.62544	9.58367	9.50889	9.41602	P	P	P	7.21432	7.15693	7.4909	P	P	P	CUST_92482_PI430048170	0	Noncoding	GGAACATTCAAGGGAATTTGATGATGTGCATGATGTCTCTGTCTGATACAAAAAGAAAAA	lncipedia	chr9	+	72628024	72651618
CUST_70117_PI430048170	0.0115786	3.01704	7.99512	7.999	7.30692	P	P	P	6.15601	6.38333	6.06725	P	P	P	CUST_70117_PI430048170	0	Noncoding	GCACCTCAAATTGCACCAGAATTGCTGATGACTGTGAACTTCCTAGATTGTTAAATAAAT	lncipedia	chr1	+	115556825	115557475
CUST_59907_PI430048170	0.0277716	2.13198	6.4215	6.69532	6.05019	P	P	P	5.29201	5.30368	5.36523	P	P	P	CUST_59907_PI430048170	0	Noncoding	CAGATATCCGCCCATTTTCATCTCTTCATTATAGTCAAACAGTGTGACTTGAGAGTGTTG	lncipedia	chr13	+	22903262	22919209
CUST_95733_PI430048170	0.0072788	2.11143	5.63376	5.50331	5.10232	P	P	P	4.54575	4.37893	4.09633	A	P	A	CUST_95733_PI430048170	0	Noncoding	AATATCAAAAATGACTTTACTGAAGAAGAGGAAACCCAGGTATGCCAAGCGAACCAGCGG	lncipedia	chr5	-	80746338	80746819
CUST_70521_PI430048170	0.02373	3.5248	7.69271	7.82586	6.78172	P	P	P	5.83326	5.73249	5.46263	P	P	P	CUST_70521_PI430048170	0	Noncoding	GTTCTACTCAGTGAATGGATTACAGCGAACTGAAGAAAGAAGGTCCAGATTTCCAAATGA	lncipedia	chr2	-	215804730	215804981
CUST_96091_PI430048170	0.00185112	2.11635	11.1787	11.0708	10.8899	P	P	P	10.0433	9.94946	9.91335	P	P	P	CUST_96091_PI430048170	0	Noncoding	GTAGATTTAACCATCTTCTCATTCCACTTGGCAGGTGTTTCTTCTGTTTTAGGGGCCATT	lncipedia	chr17	+	19605453	19605933
CUST_18774_PI430048170	0.000584426	0.455468	5.70132	5.64189	5.8458	P	P	P	6.89891	6.70513	6.98253	P	P	P	CUST_18774_PI430048170	0	Noncoding	TAAGTACCTCTGGACACAATGGAAGTAGTAGTTGTTGAGCAGAGGGAAAGGGATAGGAGA	RefSeq	chr6	-	71407864	71420745
CUST_70453_PI430048170	0.0263857	2.40974	7.56691	7.6816	6.94581	P	P	P	6.25327	6.0521	6.17804	P	P	P	CUST_70453_PI430048170	0	Noncoding	AAGGATGCAGACATAAATGGATTACCAACAAAAGGGCCAACAGACATCTCTGATAAAAAG	lncipedia	chr2	+	202995193	202995403
CUST_74760_PI430048170	0.0045894	2.47487	7.93825	7.48706	7.7203	P	P	P	6.3056	6.158	6.73198	P	P	P	CUST_74760_PI430048170	0	Noncoding	GAAGCTAGTTTTTACTGTCACACTCATTCTCATGGAAGAGATATTTTCCCTTTAGCAAAT	lncipedia	chr4	+	119267380	119273330
CUST_29231_PI430048170	0.00116651	0.475962	7.3745	7.18669	7.39214	P	P	P	8.35205	8.44377	8.37804	P	P	P	CUST_29231_PI430048170	0	Noncoding	TTTAAAGATGGTGGCAGTGAAACTGGTACATGGGACCTGACTGGGCTTTGTTTGCAACTT	ENSEMBL_GENCODE	chr16	+	50645809	50649249
CUST_75986_PI430048170	0.0337915	2.3038	8.12014	7.94553	7.35477	P	P	P	6.63015	6.57135	6.70971	P	P	P	CUST_75986_PI430048170	0	Noncoding	CTCTATAGACCATGACTGAAAGATGAAACCACCTGGTATCTGAAGCATCATTGGCCTTGA	lncipedia	chr5	+	132948492	132948718
CUST_106800_PI430048170	0.0039748	0.468984	3.69642	3.90466	4.1343	A	A	A	5.15434	4.93056	4.95012	P	P	P	CUST_106800_PI430048170	0	Noncoding	GAAGACTGAAACCAAGAATGTTGTTCTTATGCTGGAAATTTGACTGCTAACATTCTCTTA	RefSeq	chrX	+	55280087	55288786
CUST_111318_PI430048170	0.00732223	2.63996	5.66612	5.68636	5.11932	P	P	P	4.04385	4.45824	3.74753	A	A	A	CUST_111318_PI430048170	0	Noncoding	AAAGCACCAAACCCAGAAGACAATGATGAGGAGGAGGATGTTTCAGATCTTGTAGAATAT	lncipedia	chr4	-	168598239	168598757
CUST_99786_PI430048170	0.000171225	0.462862	5.93792	5.75306	5.88933	P	P	P	6.86328	7.06865	6.9814	P	P	P	CUST_99786_PI430048170	0	Noncoding	CTGGTAATCAGCTGTTTCTGATTTTGCATGCTCTTCTATCTCTGGTAACAAAATAAAATC	lncipedia	chr2	-	60524497	60528215
CUST_20716_PI430048170	0.000839209	0.42478	12.1126	12.0577	12.1044	P	P	P	13.2268	13.3336	13.4143	P	P	P	CUST_20716_PI430048170	0	Noncoding	GAAACTATCTGAAGAATGCACATTGAAGGCCGTGAGGTACTGATAAACTAAAGAATTTAT	ENSEMBL_GENCODE	chr8	+	32766125	32767959
CUST_9513_PI430048170	0.00933565	0.356123	5.25404	4.72384	4.72766	P	P	P	6.455	6.4651	6.3162	P	P	P	CUST_9513_PI430048170	0	Noncoding	TTCAGAAAGGCTGCTGAATCTTCAGAAAGGCCTTTCTGAACCTTCAGAAAGGCTGCTGAA	RefSeq	chr5	+	160474401	160474483
CUST_121883_PI430048170	0.0198206	2.17231	8.41353	8.51555	7.92483	P	P	P	7.13478	7.29061	7.13133	P	P	P	CUST_121883_PI430048170	0	Noncoding	GCAACAGCAATAAGATTTGCTATAATGGGATTCATTGGATTTTCTGTGCAATTGGTTCAT	NONCODE	chr2	-	193730554	193730689
CUST_72036_PI430048170	0.00950759	2.72622	4.5351	4.47804	4.91251	P	P	P	2.81115	3.59848	3.10344	A	A	A	CUST_72036_PI430048170	0	Noncoding	GCATGGCCATTGACCCAGTCCATCTTATGCAAATCTGGATGCCATAAATAATATTTAAAA	RefSeq	chr22	+	21282424	21297726
CUST_66560_PI430048170	3.5048e-05	5.81133	7.76858	7.98937	7.72885	P	P	P	5.19449	5.3901	5.29286	P	P	P	CUST_66560_PI430048170	0	Noncoding	CAGTTCACAGACCTAAGTCAATGTTAGTCTACTACTGTACATCTGGTAACCTCAATCCCT	lncipedia	chr2	+	131296842	131309068
CUST_4937_PI430048170	0.014251	2.55004	7.408	7.46409	6.76719	P	P	P	6.01664	5.97143	5.67442	P	P	P	CUST_4937_PI430048170	0	Noncoding	GTTGTACACAGGGTATTTATAGCAGCATAGACTGGGAAGATGGGCAACAAAGGGGATACA	RefSeq	chr14	+	55766244	55767717
CUST_80616_PI430048170	0.00158989	18.4842	9.69028	9.56061	9.62523	P	P	P	5.00798	5.66069	5.50811	P	P	P	CUST_80616_PI430048170	0	Noncoding	CTTCGAAATGACAATCAAGAAGCAGCAGCCATGAAGAATGAAAGTTTTAAAACACAAGGA	lncipedia	chr9	+	33533485	33541227
CUST_80759_PI430048170	0.0270205	3.2981	5.55229	5.40702	5.43615	P	P	P	3.15952	3.63714	4.23597	A	A	A	CUST_80759_PI430048170	0	Noncoding	TTGTGTTGATGTTTGCTTCTCATGGGACATCTAATAGGTTAACCAGAGCGCAAAGAAACA	lncipedia	-	-	-	-
CUST_74377_PI430048170	0.0216546	3.60884	8.81596	8.90633	7.95423	P	P	P	6.84861	6.83278	6.60465	P	P	P	CUST_74377_PI430048170	0	Noncoding	GATTCCATGAAAGATTTTGAGGAGGTGAAGAGGGCTGGTACCTTTCAGAGTGCAAAGTGA	lncipedia	chr4	+	54076624	54076848
CUST_97758_PI430048170	0.0237009	2.66479	7.37256	7.44454	6.74292	P	P	P	5.77288	5.7837	5.85753	P	P	P	CUST_97758_PI430048170	0	Noncoding	ATCTTTGCTGGCATTCAGAAGAAGGCAGAAAGGGCAGACTTGATAGCTTATCTCAAAAAA	lncipedia	chr2	-	78412792	78413094
CUST_113668_PI430048170	0.00274112	10.2761	5.73102	5.81157	5.75557	P	P	P	2.75769	2.1807	2.19998	A	A	A	CUST_113668_PI430048170	0	Noncoding	TCTCTGCTACATGTACAAGTACAGTTGCTCCAAGAAGTGCCATAAGAATGTGTCCGTGAG	lncipedia	chr9	-	32727068	32727522
CUST_89721_PI430048170	0.0290927	2.04822	9.58636	9.74373	9.03072	P	P	P	8.28406	8.4562	8.5937	P	P	P	CUST_89721_PI430048170	0	Noncoding	AGTGACTTTACAGCTGTCCACCACCTTACCACACATTTGAAGAGCCAACCTGTGTGAAAA	lncipedia	chr4	-	155459703	155461237
CUST_42612_PI430048170	8.26802e-05	0.404399	7.68436	7.73771	7.76787	P	P	P	9.04929	9.04	9.02018	P	P	P	CUST_42612_PI430048170	0	Noncoding	CGTTTCAAAAGCAAAAGTCCCCTACCAGCCAGTGAAGCTACCTGATTTCTCAGTATCTTA	RefSeq	chr21	+	36005319	36008295
CUST_95881_PI430048170	0.0409612	2.19038	8.9232	8.91372	8.19453	P	P	P	7.56706	7.67018	7.50971	P	P	P	CUST_95881_PI430048170	0	Noncoding	AAAGCAAAAACCCTTGCTACACGGGCAACAAAAGAATTCAAGAAACTGAAGGACCAAGCT	lncipedia	chr7	-	149321864	149322092
CUST_102409_PI430048170	0.000186739	2.113	10.4331	10.4844	10.6314	P	P	P	9.49923	9.33926	9.47481	P	P	P	CUST_102409_PI430048170	0	Noncoding	ATCCTGCACTTCAGACTATTTGTCGGAGCACGGATCTACCACACCATTGCATATTTGACA	RefSeq	chr12	+	16347777	16364410
CUST_62116_PI430048170	0.00263287	2.44274	10.711	10.7421	10.2974	P	P	P	9.06892	9.4816	9.34559	P	P	P	CUST_62116_PI430048170	0	Noncoding	AAGCACTCTGAGAACAGAGATAGCTTCCTGAAATCGTGAAGGAAAATGATCAGAAAAAGA	lncipedia	chr15	+	72134640	72135436
CUST_67658_PI430048170	0.0170356	2.79869	5.86275	5.99721	5.13167	P	P	P	4.57123	3.67614	4.29186	P	A	A	CUST_67658_PI430048170	0	Noncoding	GAGGATGCTGGAAACAACGGAGGTAATTGAGTCTTTGTACCAGTAAATGGATGACCTGGA	lncipedia	chr15	-	75950463	75951144
CUST_100370_PI430048170	0.000697239	2.05692	8.16154	7.95404	7.9012	P	P	P	6.86315	6.96977	7.06842	P	P	P	CUST_100370_PI430048170	0	Noncoding	ACCAACCTCCCCAGGCTGGGCTGGGTAAATGTTTCTTCCAAAAGACTCACCCTCAAGCAC	lncipedia	chr1	+	8512652	8513021
CUST_6055_PI430048170	0.000119278	12.1294	8.79535	8.48341	8.8672	P	P	P	5.38079	4.80919	5.12657	A	P	A	CUST_6055_PI430048170	0	Noncoding	TAGGAATTCTAGTGACTATGTTGCCACCATCTTGGAGCTCCATGCCCTCATAGTGTAATG	RefSeq	chr9	-	38540566	38545372
CUST_71798_PI430048170	0.00335072	2.02662	8.57808	8.35639	8.5111	P	P	P	7.65005	7.25914	7.46163	P	P	P	CUST_71798_PI430048170	0	Noncoding	ACTGCTGGACAGAGTGAGTGGGACCTCTCCGCAGTTCCGTAGCTACCTCATATGGCTTAG	lncipedia	chr21	+	36104861	36107933
CUST_37347_PI430048170	0.00406662	2.01183	9.83335	9.41115	9.72914	P	P	P	8.47037	8.6657	8.82323	P	P	P	CUST_37347_PI430048170	0	Noncoding	GAGAGGGGTGTGTAAAATGAAGACATCTGTGTATATTGTTAATTGGGAAAAACAGTTTAC	lncipedia	chr8	-	130143425	130227548
CUST_110299_PI430048170	0.0110644	2.04252	9.36042	9.38447	9.01831	P	P	P	8.19759	8.22847	8.27335	P	P	P	CUST_110299_PI430048170	0	Noncoding	ACCGCACGCTGACGCCCACCCTGGAGGCACTGTTTGTAAGTAGTTTTCAGAAGACAGAGT	lncipedia	chr19	+	2396177	2398822
CUST_10557_PI430048170	0.0403122	3.80957	5.53703	5.56682	5.61926	P	P	P	2.81865	4.29527	3.43891	A	P	A	CUST_10557_PI430048170	0	Noncoding	CTGTCTCTGAAGAGGAGGAGGAAGTAAAAGTTGAAAAACAACAGGAATGAAGTCATTGGC	ENSEMBL_GENCODE	chr1	+	20157692	20160566
CUST_89736_PI430048170	0.0215888	2.01765	7.56165	7.6601	6.99231	P	P	P	6.25444	6.67197	6.29782	P	P	P	CUST_89736_PI430048170	0	Noncoding	CAGGCCGAGAAGAAGGAGATAATCCAGACTTTGTCCAAGGAGGAAGAGATCAAGAAATAA	lncipedia	chr4	+	178286694	178287285
CUST_77547_PI430048170	0.0069955	3.21539	9.41162	9.36018	8.8837	P	P	P	7.48241	7.63135	7.53919	P	P	P	CUST_77547_PI430048170	0	Noncoding	CAAAGGCTAAAGAACTTGGCACTAAACTCGGTTAAATGTATACTATTGAGTTTTCTGTAC	lncipedia	chr6	+	94344736	94344962
CUST_35058_PI430048170	0.00381012	0.473925	8.25515	8.10839	8.01037	P	P	P	9.20853	9.18805	9.21954	P	P	P	CUST_35058_PI430048170	0	Noncoding	GGACATTGAATGACTGTATGCTGCTTTTGATTTCCGTTAATATGGGCAACTGTCCAATTA	ENSEMBL_GENCODE	chrX	-	134543337	134546632
CUST_113645_PI430048170	0.00206423	2.2543	6.70137	6.38009	6.77268	P	P	P	5.40812	5.32172	5.61934	P	P	P	CUST_113645_PI430048170	0	Noncoding	ACCTCCAGATAGACTCCTGCGGCATCACAGACAAGGTGCTTGCCCAGCTACTGTGAGCAT	lncipedia	chr9	-	60832664	60847048
CUST_58036_PI430048170	0.0231199	2.06916	13.3987	13.5316	12.9626	P	P	P	12.3253	12.2711	12.2062	P	P	P	CUST_58036_PI430048170	0	Noncoding	GGGAATGAAAGTGGTGCTAAGTTGAATGAGCTGATGGATATGGATCACCAGCCCAAAAAT	lncipedia	chr11	-	92498151	92498935
CUST_63805_PI430048170	0.00282381	6.9777	6.42268	6.19403	6.29523	P	P	P	3.85261	3.43572	3.13339	A	A	A	CUST_63805_PI430048170	0	Noncoding	GAGAGGCACATCTCAACACAGCTCACTGATCAGACTCAGCAATTCCATTCTGCATCTTTT	lncipedia	chr18	+	14252040	14253257
CUST_55276_PI430048170	0.00192156	0.385016	4.18175	4.41711	3.93895	A	A	A	5.76277	5.59341	5.31767	P	P	P	CUST_55276_PI430048170	0	Noncoding	AATCTGGACATCTTTAGCACAAAAGTGAAACAAAGTAATCAAGGACAAAGCGGGCTAGGA	lncipedia	chr1	+	192809041	192811239
CUST_31672_PI430048170	0.000604709	4.8668	8.17022	8.22228	8.41788	P	P	P	5.97071	6.02798	5.97402	P	P	P	CUST_31672_PI430048170	0	Noncoding	TCTCCAACAAATCCTGGCTGGATGCACTGTATGTGTTATTAATAAAACAGCTGTAAAAAT	RefSeq	chr18	-	56083355	56137536
CUST_61146_PI430048170	0.00352051	2.58942	6.90496	7.01641	6.98087	P	P	P	5.46636	5.49025	5.8047	P	P	P	CUST_61146_PI430048170	0	Noncoding	TCAGAGGACTCATCTGATGATGTGAGAAGAGTTCAGAGGAGGGAGAAAAATCGTATTGCC	lncipedia	chr14	+	75522454	75546887
CUST_119560_PI430048170	0.0240338	2.161	11.6229	11.728	11.1128	P	P	P	10.4208	10.4635	10.3119	P	P	P	CUST_119560_PI430048170	0	Noncoding	TGGTTTAAGCTCAAAGAACCAGCTGACTACAAGTCTTGTGCCTATGACTGGGCCTATGAA	NONCODE	chr12	+	14169745	14169877
CUST_107000_PI430048170	0.00601202	6.86245	5.59522	5.0697	4.99667	P	P	P	2.02569	1.98957	3.09553	A	A	A	CUST_107000_PI430048170	0	Noncoding	CTGTCATGGAAAAAGCTTGGGGTAGGTTGTTTTTGTTTCTTTCTTTCAAGACTTCTATTT	lncipedia	chr14	+	61051885	61052464
CUST_9116_PI430048170	0.0208642	0.27484	3.08307	2.00295	3.1264	A	A	A	4.37783	4.68475	4.93927	P	P	P	CUST_9116_PI430048170	0	Noncoding	TAATGGTTTGTGGATTTTGAAAAGGTGCAGGCCATATTGTGCTGCCTCAAAAATACAAGG	RefSeq	chr13	-	50049118	50049201
CUST_123165_PI430048170	0.00807459	2.05994	6.42048	6.42605	6.05501	P	P	P	5.18991	5.55548	5.00313	P	P	P	CUST_123165_PI430048170	0	Noncoding	TGTGGACATCTAATTGAAGCCCACAAGGAGTGCATGGGCTCTCTGAGATTTAAGATATGA	NONCODE	chr4	+	131112747	131113255
CUST_70986_PI430048170	0.0165328	2.94395	10.2665	10.3483	9.69796	P	P	P	8.56786	8.61377	8.53961	P	P	P	CUST_70986_PI430048170	0	Noncoding	TTCCTTGTCTATCATCAGTGGGTACAAGAAGGTCCTGGCTTTGTCTATGGAGACTGAGTT	lncipedia	chr20	-	16586332	16586693
CUST_80150_PI430048170	0.0271833	2.13823	9.27981	9.44124	8.742	P	P	P	8.20277	8.08991	7.95981	P	P	P	CUST_80150_PI430048170	0	Noncoding	CAAGCAAGTATAGAAAAAGTTGGTTCTCTTCCCAAAGCTAAGTGCATCAATTATGTGAAG	lncipedia	chr8	+	103016743	103017589
CUST_93709_PI430048170	0.000633521	3.01555	7.92872	8.1327	8.14706	P	P	P	6.26543	6.5084	6.64256	P	P	P	CUST_93709_PI430048170	0	Noncoding	AGCCTTCAAATACTTCCTGCAAGGCATGGGCTACAGTGAGTACATTTCCACCCCACCCCA	lncipedia	chr16	+	58507727	58509389
CUST_89997_PI430048170	0.00264154	2.93322	6.03625	5.76592	5.85714	P	P	P	4.54377	4.03434	4.39076	P	A	A	CUST_89997_PI430048170	0	Noncoding	CTACCGTGAGGTTGGTGTAACCCATGTGGGATTTCCTTTAAGGATGGCTTAGAAATGGAA	lncipedia	chr6	-	85427452	85427966
CUST_91231_PI430048170	0.000104317	2.69393	7.20858	7.12653	6.99048	P	P	P	5.58078	5.64733	5.80722	P	P	P	CUST_91231_PI430048170	0	Noncoding	TTTGGAGAGCAAAAAATTTGCAGTGAGAGCAGTGACCAGGGATGTGACTTGACCAAATGC	RefSeq	chr3	+	185959968	185980876
CUST_14914_PI430048170	0.00595418	2.063	6.63594	6.69128	6.67983	P	P	P	5.43801	5.70098	5.71772	P	P	P	CUST_14914_PI430048170	0	Noncoding	TAATAAATCTGCCTGGCAGCCCTCAGATGTGATTTGGCCTTGAAATCGTCTCTGTTAATC	RefSeq	chr3	-	72035518	72100455
CUST_66108_PI430048170	0.00229346	0.160323	5.32907	5.30532	5.73258	P	P	P	8.13004	8.07002	8.13004	P	P	P	CUST_66108_PI430048170	0	Noncoding	TCCAAAAACTGAAGAAGATGGTGGATAAGCCCACCCAGGTGAGGCCAAGGGGCTACAGAG	lncipedia	chr2	+	85694903	85696532
CUST_50736_PI430048170	0.00330309	3.5994	6.73896	6.84045	6.51776	P	P	P	4.47417	5.11776	4.90803	P	P	P	CUST_50736_PI430048170	0	Noncoding	ATGGAACGTTCCAGAGACCCATTAGTGCCAAAGGCAAATGAAAACACACCCTGTGAAAAT	RefSeq	chr16	-	975760	981318
CUST_123703_PI430048170	1.40642e-05	2.48352	8.01025	7.94257	8.069	P	P	P	6.7322	6.63622	6.71718	P	P	P	CUST_123703_PI430048170	0	Noncoding	GTCATCTAGGAGACTGGTTCTATTATTTACGTAGATGTTCTTGAATTAAAGGATGGGAAT	ENSEMBL_GENCODE	chr5	-	180784782	180787869
CUST_27505_PI430048170	0.000514628	4.75006	8.67904	8.70245	8.70512	P	P	P	6.50968	6.49539	6.33111	P	P	P	CUST_27505_PI430048170	0	Noncoding	TGTCCACTGTTGCAATGACCCCAGGAAGCTACCCCCAATAAACTGTGCCTGCTCAGAGCC	ENSEMBL_GENCODE	chr14	-	105599904	105600209
CUST_68675_PI430048170	8.13273e-05	4.06621	13.4302	13.2256	13.2916	P	P	P	11.1423	11.2941	11.4328	P	P	P	CUST_68675_PI430048170	0	Noncoding	AATAGACTATTGCCTACTGGACTCCTGGTCAGGGAACCTTCAAAAGCAAAACAAAAAACC	lncipedia	chr15	-	89797444	89799560
CUST_61559_PI430048170	0.0076869	3.49971	7.39227	6.79101	7.07958	P	P	P	5.29178	5.25013	5.35975	P	P	P	CUST_61559_PI430048170	0	Noncoding	TCCTGCATCCCATTCTTCTACCGAGGAGACAAGAAAAAGATCAAGATCATCAATATCTAA	lncipedia	chr15	+	22767777	22776058
CUST_106802_PI430048170	0.0355355	2.8754	11.2771	11.3376	10.4014	P	P	P	9.60807	9.5884	9.41624	P	P	P	CUST_106802_PI430048170	0	Noncoding	TCCATACGAGTTCTACCCAGTGAATGTGGATTACAGCATACTGAGGAAAGAAGGTCCAGA	lncipedia	chr1	+	168215404	168215652
CUST_99905_PI430048170	0.00079363	0.279754	8.02855	7.61529	7.77609	P	P	P	9.56949	9.60706	9.77833	P	P	P	CUST_99905_PI430048170	0	Noncoding	TACAGTGAATCCATATATTTCTGTATTTCCTGGATAAGGAAGAGCAAAGGAGCTGAGCTG	lncipedia	chr22	-	32149179	32149926
CUST_65712_PI430048170	0.0318355	2.59947	4.44474	4.99401	5.55429	P	P	P	3.45394	3.45488	4.06953	A	A	A	CUST_65712_PI430048170	0	Noncoding	CAAAACGTTTTTGGGTTAAGAGAGACTGTCATCAGCCCATTGCACTCACTCAGATGTGGA	lncipedia	chr2	+	43731540	43743870
CUST_56949_PI430048170	0.0304749	2.48402	7.87414	8.06472	7.29075	P	P	P	6.45656	6.42879	6.51248	P	P	P	CUST_56949_PI430048170	0	Noncoding	AATCAGAATGGAAAAGACTCAAAACCGTCAACACCAAGATCAAAAAGACAAGAATCCTTC	lncipedia	chr10	+	124867509	124868326
CUST_105169_PI430048170	0.00430812	2.0054	6.60763	6.55992	6.58145	P	P	P	5.71991	5.5343	5.47183	P	P	P	CUST_105169_PI430048170	0	Noncoding	GCCACCTGAGCCATAATGACTTATTTAAAGCAATAGTTCATCATTCAAGACACTTAATTG	lncipedia	chr18	-	24367933	24377538
CUST_50634_PI430048170	0.00145355	3.62772	8.40155	8.4073	8.42361	P	P	P	6.48366	6.46504	6.69516	P	P	P	CUST_50634_PI430048170	0	Noncoding	GGGGTTCGACAGGTAAACACAAACTGCTATTTCAGTAGAAGAAGTTATTGTTATGAATAT	lncipedia	chr10	+	126012391	126014591
CUST_50381_PI430048170	0.000443477	0.413019	7.12886	7.09916	7.09689	P	P	P	8.30608	8.42176	8.4214	P	P	P	CUST_50381_PI430048170	0	Noncoding	AGGTTCTGCTCACCCTCCAATGGCAGTCGTCTTCAAAAACAATAAAGATATCTGTGCTTG	ENSEMBL_GENCODE	chr12	+	90107739	90112779
CUST_39502_PI430048170	0.00800927	2.00469	8.5708	8.55235	8.47291	P	P	P	7.34873	7.48774	7.72587	P	P	P	CUST_39502_PI430048170	0	Noncoding	ACATGACATGAATCATTGTGGTTTTACTCCTGGGTAGAATTGTTTTTCTGTATTGCATTG	ENSEMBL_GENCODE	chr21	+	33969519	33977104
CUST_55107_PI430048170	0.0194525	2.42203	9.29602	9.35276	8.77019	P	P	P	7.84266	7.93449	7.88001	P	P	P	CUST_55107_PI430048170	0	Noncoding	TTCAAACCTACTGAGAACTAACATGGATGGGCTGAAGAAGAGGGACAAAAAGAACACAAG	lncipedia	chr1	-	171345104	171345307
CUST_10338_PI430048170	0.00650538	0.409336	4.33681	4.75035	4.65304	P	P	P	5.73048	6.21499	5.62074	P	P	P	CUST_10338_PI430048170	0	Noncoding	CAGATCAGACAACCAACCACACAAAGTTTCTAAGAGCAAACTGTTCAGGTCGGCAAGTCA	RefSeq	chr1	+	817370	819834
CUST_62871_PI430048170	0.00122916	2.15282	5.30329	5.50049	5.18481	P	P	P	4.21016	4.13633	4.3342	A	A	A	CUST_62871_PI430048170	0	Noncoding	GGATGGACGGGAGACAACATTTGTAAGTTTAGAGTTTTGGGAACGTTGTTTCGTTTAATC	lncipedia	chr17	-	38703204	38704538
CUST_109866_PI430048170	0.00324477	2.51178	6.86766	6.65169	6.62175	P	P	P	5.31115	5.16824	5.64586	P	P	P	CUST_109866_PI430048170	0	Noncoding	GGGTTTCCCACTTAAAATGTTTTAAAACTGAAAGTCTCTTGTTCAAGTTGGTGTTTGGAT	lncipedia	chr14	+	59188645	59266161
CUST_44307_PI430048170	0.00186166	4.4218	6.73285	6.78169	6.21955	P	P	P	3.98658	4.67023	4.61332	A	P	A	CUST_44307_PI430048170	0	Noncoding	AAGTTCTTGTGTAATGAAGTCAATGCTGTCAGGCCAAGAAATGAAATAATTGCTTACCTT	RefSeq	chr15	-	90346530	90349447
CUST_27506_PI430048170	0.000588173	5.88777	6.33156	6.1537	6.45986	P	P	P	3.44429	3.97857	3.81475	A	A	A	CUST_27506_PI430048170	0	Noncoding	ATGGGAGCAGAAAGATGAGTTCATCTGCCGTGCAGTCCATGAGGCAGCAAGCCCCTCACA	ENSEMBL_GENCODE	chr14	-	105597887	105600209
CUST_54211_PI430048170	0.0156893	0.409354	6.97349	6.41566	6.37397	P	P	P	7.7965	7.9476	7.95978	P	P	P	CUST_54211_PI430048170	0	Noncoding	AAGCATTAATTGTGTCTTTAAGGGTTAAACAGAGGCTCTCTGATTTCTGAATGTTACCTT	lncipedia	chr1	+	78636691	78641485
CUST_61466_PI430048170	0.029532	0.484663	3.58304	3.15361	3.9922	A	A	A	4.45977	4.87692	4.61667	P	P	P	CUST_61466_PI430048170	0	Noncoding	GCCTTTGTCTGCAGCATCCAGCCAGAAATCCCTGAAAACTATCGCATAAGTAGATATTAA	lncipedia	chr14	-	105785504	105785831
CUST_107568_PI430048170	0.00140211	2.27097	9.83594	9.80003	10.0989	P	P	P	8.6529	8.71651	8.82884	P	P	P	CUST_107568_PI430048170	0	Noncoding	ATTCTGAAGGGACGCATAAGACATTGGTATTGGTTGCCTATGGGGAATATAATTGATATG	lncipedia	chr4	+	119212742	119220211
CUST_119396_PI430048170	0.000842846	0.476333	9.96658	9.96649	9.81577	P	P	P	10.9804	11.0207	10.9622	P	P	P	CUST_119396_PI430048170	0	Noncoding	AAAGGGGCACGGGCATGTGAAATTTGCATCACATACATTTGTGAAGAAGACAGGTACCTG	NONCODE	chr11	-	105066161	105070692
CUST_69664_PI430048170	0.00784859	2.73344	11.3281	11.3385	10.8929	P	P	P	9.73003	9.81343	9.70475	P	P	P	CUST_69664_PI430048170	0	Noncoding	GTAGGAGGCCTAACCAGCATTGTATTAGCCAACTCATCACTGGATATTGTACTACATGAT	lncipedia	chr12	+	40286288	40286662
CUST_80032_PI430048170	0.00142608	2.38896	6.24085	6.29661	5.91669	P	P	P	5.07236	4.7268	4.89354	P	A	P	CUST_80032_PI430048170	0	Noncoding	CAGTTATTATCAACGTGTACCTGAAAAAATGTGACTCTGCCTTGATGTTAAGTGTTTGTT	lncipedia	chr8	+	88485109	88486094
CUST_54616_PI430048170	0.0132093	6.34318	5.4564	5.10265	5.13333	P	P	P	2.04169	2.12123	3.2333	A	A	A	CUST_54616_PI430048170	0	Noncoding	GTGAGAGACTTGAAATCACAGATGGAGCATTTCTTGCAACAAGAGATACTATTTTTTCAA	lncipedia	chr4_GL000008v2_random	-	124582	125315
CUST_46576_PI430048170	0.00029821	2.01509	7.92722	7.96486	7.8175	P	P	P	6.92179	6.97746	6.77428	P	P	P	CUST_46576_PI430048170	0	Noncoding	CAGGAGATTGATGCATCCCAGTTTACTCTTTTTGGCATATGTTTTTACTCATAAATTAGG	RefSeq	chr6	+	27761743	27763187
CUST_48304_PI430048170	0.00201435	0.478919	5.19828	4.87798	4.97517	P	P	P	6.04166	5.90752	6.28235	P	P	P	CUST_48304_PI430048170	0	Noncoding	TATCACATCAAGTAGTGGTTCTGGGAATTCAAAGGAGAGCTCAGCAAAAGAAGAAGAAAA	lncipedia	chr4	+	23779452	23782786
CUST_115124_PI430048170	0.0491178	0.336305	4.77895	4.33853	4.36891	P	A	P	5.30777	6.65593	5.97227	P	P	P	CUST_115124_PI430048170	0	Noncoding	ACATCTGTAATCTCCCTGCAGCAGAGTCAACTGCATAAGAAACCAAAAGACACACCTGCT	RefSeq	chr3	-	37790089	37861780
CUST_56712_PI430048170	0.0331491	2.51536	8.02983	8.06521	7.23483	P	P	P	6.39061	6.6458	6.4301	P	P	P	CUST_56712_PI430048170	0	Noncoding	GAAAAAGCACCATTGAAGAAATCTACATACTCCAGCCAAAAATGCACAAAAGTCAAATCA	lncipedia	chr10	-	96189365	96190219
CUST_112144_PI430048170	0.00503891	2.1434	7.02132	6.86217	6.54142	P	P	P	5.87908	5.57501	5.69535	P	P	P	CUST_112144_PI430048170	0	Noncoding	TTCTGCCTCAGTCGCAGGGTTCCCAATATGCTGCTGAATGATGAGGAAACTGAGAGTTGA	lncipedia	chr9	-	101356465	101356844
CUST_16906_PI430048170	5.19945e-06	2.90519	7.13201	7.02801	7.04653	P	P	P	5.50849	5.48527	5.59663	P	P	P	CUST_16906_PI430048170	0	Noncoding	ATGACCATGGCCACATACAGGAGGAGACCCTAAAACTCCATTGGCCTCATGTCCAGAACT	RefSeq	chr5	+	473235	480891
CUST_52598_PI430048170	0.0328449	3.23788	5.26218	5.19831	4.62267	P	P	P	4.03575	3.04078	2.62519	A	A	A	CUST_52598_PI430048170	0	Noncoding	CTTATGAAGAGGTTACAACCGAATTAGAAGAATATAAGGAAGCCTTTGCAGCAGCATTGA	RefSeq	chr2	-	94760927	94857075
CUST_39508_PI430048170	0.00285174	0.371773	4.90189	4.6755	4.45658	P	P	P	6.4006	5.84404	6.0506	P	P	P	CUST_39508_PI430048170	0	Noncoding	ATAGTGGGAAACGAAATCTTTGTTCTGGATGCAGTTATAATTTGGAAAGCGAGGAAATAA	RefSeq	chr8	+	124942007	124951095
CUST_98831_PI430048170	0.0016345	2.09165	9.50303	9.62449	9.45306	P	P	P	8.46038	8.48309	8.44839	P	P	P	CUST_98831_PI430048170	0	Noncoding	TCAGAAGTTGCTGTGGCTACACATAGTGTCTGTGGGAGGTTATGTTTATTTGAGACTTCT	lncipedia	chr5	-	39394353	39424870
CUST_120923_PI430048170	0.00380937	2.02415	8.71085	8.66766	8.89468	P	P	P	7.52987	7.73336	7.93923	P	P	P	CUST_120923_PI430048170	0	Noncoding	GCAGTTGGCTGTCTGGGATACTACCTACCTTCTTTTGTGTTCTTATTAATAAAATTAAAG	lncipedia	chr17	+	76543802	76553578
CUST_47280_PI430048170	0.000491244	3.44897	9.97481	9.86161	9.77991	P	P	P	7.89513	8.09922	8.2485	P	P	P	CUST_47280_PI430048170	0	Noncoding	ACTTGAAATTGGGGAATCTGATATGTCTCTAATAATAAAGGCTTCACAGTACAACTGTTG	lncipedia	chr8	-	103481252	103499494
CUST_106853_PI430048170	0.00147791	2.90296	5.65744	5.29396	5.36513	P	P	P	4.17637	3.685	3.82345	A	A	A	CUST_106853_PI430048170	0	Noncoding	TTCTGGGACACAGTTCAATTCTCATTTGTCACACACTTTGGCTATTAGAGATCAACCCCT	lncipedia	chr16	+	10928163	10932222
CUST_35416_PI430048170	0.0102243	0.422484	3.92525	3.33031	3.97456	A	A	A	4.70012	5.2688	5.01916	P	P	P	CUST_35416_PI430048170	0	Noncoding	TCCTCTGTCTGTCCAGGGCTCCCGGGAGCCAGGGGAGATGCTACCTCGGAAGCTGAAGCG	ENSEMBL_GENCODE	chr21	+	44439035	44439110
CUST_106824_PI430048170	0.0264862	3.4727	4.46805	4.7124	4.30068	P	P	P	2.62257	3.24648	1.98129	A	A	A	CUST_106824_PI430048170	0	Noncoding	CTTGCTGCCTTAATTTCGATGACCTTTTTAAATAAATGAGTTGGAACTATGACCCTTGAC	lncipedia	chr7	-	117755371	117758112
CUST_14396_PI430048170	0.00515314	0.226513	3.11707	2.18925	2.64366	A	A	A	4.63838	4.72911	5.11267	P	P	P	CUST_14396_PI430048170	0	Noncoding	AATCTGTATCGGCTAACGGGAAGGAAGTTACGAGCAAGTTCCACCGGAAAGAAAATCTAG	ENSEMBL_GENCODE	chr2	-	238427077	238427729
CUST_31703_PI430048170	0.000105261	0.317672	6.5018	6.26762	6.40898	P	P	P	8.01149	7.99846	8.13711	P	P	P	CUST_31703_PI430048170	0	Noncoding	TTGTGAAGAGTCTGCTAAACTCCCTCTATCAGAAATCCCAGAGGACTGAGAACAGGTCAT	ENSEMBL_GENCODE	chr18	+	58659858	58660524
CUST_63402_PI430048170	0.0273292	0.332115	4.36266	3.60998	4.64084	P	A	A	5.76636	5.7855	6.00534	P	P	P	CUST_63402_PI430048170	0	Noncoding	CTTTAGTAATACATCTTTGGAAGATCATGAGAGTCATGCAACTTGACTTTTTCCAGAACT	lncipedia	chr17	-	70164142	70168672
CUST_125370_PI430048170	0.00764709	0.299944	3.61968	3.33209	3.06234	A	A	A	5.05572	5.11746	5.10568	P	P	P	CUST_125370_PI430048170	0	Noncoding	GGGGATGTTTGCTTCTCTGTGGAGGAGATATGATTAAGATACTTAATAAATGGTAGATAA	RefSeq	chr8	+	29748308	29798492
CUST_116927_PI430048170	0.0277207	2.72529	13.4011	13.3465	12.5646	P	P	P	11.8223	11.7201	11.5599	P	P	P	CUST_116927_PI430048170	0	Noncoding	CAAAGCTCCCTTTGCTATTTCTGATGGTATTTATGGCTCAACATTTTTTATAGCTACAGG	lncipedia	chr1_KI270706v1_random	+	127402	127829
CUST_59874_PI430048170	0.00828053	2.12745	7.83162	7.93744	7.40095	P	P	P	6.7679	6.72961	6.43697	P	P	P	CUST_59874_PI430048170	0	Noncoding	TACAGATGTTAAAAGACCTGGCTATCGTTGATTTTCTTTCTTACAGAGTTAAGGAGATTG	lncipedia	chr13	+	21140885	21147603
CUST_39236_PI430048170	1.68991e-06	8.8729	5.48606	5.36316	5.43497	P	P	P	2.1953	2.2797	2.35896	A	A	A	CUST_39236_PI430048170	0	Noncoding	ACTAAGGCTTGGACAGTTTAGTTGATCTACCCAAGAACACAGGAACACTCCTGACTTCCA	lncipedia	chr11	-	130772770	130776780
CUST_19134_PI430048170	0.000368154	0.317423	5.19557	5.1585	5.08724	P	P	P	6.80321	6.80346	6.80329	P	P	P	CUST_19134_PI430048170	0	Noncoding	AAGAACGCTGGTAGATTGATTTGCTCTACCATCATCTCAACAGTGCTTTCCTCGGGTGTA	RefSeq	chr6	+	136629113	136648198
CUST_88847_PI430048170	0.0170019	2.07143	6.82486	6.30414	6.40439	P	P	P	5.16912	5.32642	5.84961	P	P	P	CUST_88847_PI430048170	0	Noncoding	AAACGAAACGGACAGATTGTGAAGAAGCGGACAAACCTCGCGTTAATATTCGAACCAGTG	RefSeq	chr15	+	72782834	72798199
CUST_105894_PI430048170	0.000201068	3.19557	14.263	13.9841	14.0251	P	P	P	12.3104	12.3303	12.6007	P	P	P	CUST_105894_PI430048170	0	Noncoding	AGATCGCTCAGAAAATGGGAACCCAGGGCAAATTGTATGTGCTCCTTACTGGGTTTATTA	RefSeq	chr5	+	473235	480891
CUST_10933_PI430048170	0.00126617	2.37635	6.10405	5.95681	6.03567	P	P	P	4.93376	4.6276	4.77644	P	A	A	CUST_10933_PI430048170	0	Noncoding	GGACCTCTTGGCAATCTCTGGATATCTTTCTGTGGTTTGTTATAATGGTAATTATTACTT	ENSEMBL_GENCODE	chr1	-	59055999	59078116
CUST_118390_PI430048170	0.00300787	0.430518	7.21088	7.09132	7.3612	P	P	P	8.46469	8.41063	8.44782	P	P	P	CUST_118390_PI430048170	0	Noncoding	TTGAGAGGAGCTCGTGGCCCCAGAACAAAGCTTGAGAAAACCATGGTGAATCCGGGCAGC	NONCODE	chr1	+	87331668	87332033
CUST_56939_PI430048170	0.00784061	5.05108	4.84278	5.19539	5.12249	P	P	P	2.84641	2.10671	3.0588	A	A	A	CUST_56939_PI430048170	0	Noncoding	AGATTTAACTGGTTATGCTGTAGACCATGGCAGATCGTAACAGAAGACAAAGCCCTTAAA	lncipedia	chr10	-	123953305	123962870
CUST_106772_PI430048170	0.0045718	2.96758	7.42323	7.52617	7.46567	P	P	P	5.65559	5.92712	6.09303	P	P	P	CUST_106772_PI430048170	0	Noncoding	CAAATGATCTCCATCTGGAATGTGAGAGGATGAGTACTTTGATCCAGTTGTCTGGGTTCA	lncipedia	chr3	+	189267595	189320704
CUST_107120_PI430048170	0.0379424	3.72996	7.69717	7.65834	6.4614	P	P	P	5.52929	5.63259	5.23381	P	P	P	CUST_107120_PI430048170	0	Noncoding	AAGTTCTACTCAGTGCATATGGATTACAGCAAACTGAAGAAAGAAGGTCCAGATTTCTAA	lncipedia	chr2	-	203672174	203672423
CUST_37918_PI430048170	0.0349042	2.6679	5.82638	5.59169	5.45098	P	P	P	4.55336	3.50151	4.38784	P	A	A	CUST_37918_PI430048170	0	Noncoding	TTCTAACACTGAGAGTGGGTGCTTTTCTGATTCCTATGAAGGTGGAGTGTAGGTGTCGTT	lncipedia	chr22	+	32652416	32820577
CUST_125709_PI430048170	3.02019e-05	4.48301	7.88635	7.71747	7.96618	P	P	P	5.79714	5.59157	5.69162	P	P	P	CUST_125709_PI430048170	0	Noncoding	ATCGAGAATCCCAGTGAATATATTGCCACCATCTTGGAGCTCAGTGCCCTCATAGTGTAA	RefSeq	chr9	-	66047084	66052734
CUST_70256_PI430048170	0.042646	2.90119	8.88527	9.05275	7.9827	P	P	P	7.03965	7.2693	7.20351	P	P	P	CUST_70256_PI430048170	0	Noncoding	GGGGTCCCAATGATCAATACAAATTTTACTCAATGAATGTAGATTACAGCAAACTGAAGA	lncipedia	chr8	-	64554235	64554475
CUST_112077_PI430048170	0.00873114	2.11875	6.78969	6.53678	6.56093	P	P	P	5.25105	5.79704	5.55204	P	P	P	CUST_112077_PI430048170	0	Noncoding	GCGGGCATTCACACGTAAAAGCTTTCATGGGTGTTTAGAAAATCTTTATTATAATGGAGT	RefSeq	chr9	+	67059459	67294592
CUST_89562_PI430048170	0.0361296	0.441014	4.57976	3.8707	3.62358	P	A	A	5.71275	5.06631	4.87735	P	P	P	CUST_89562_PI430048170	0	Noncoding	AGTGTTTCACAGAACCCTTATGGGAAATGCTGACAAACATCATCAGAAGGTAAATTGGAA	lncipedia	chr3	-	124772931	124776515
CUST_88368_PI430048170	0.014188	0.417819	4.26269	3.77946	3.53165	P	A	A	5.17943	5.29577	4.95266	P	P	P	CUST_88368_PI430048170	0	Noncoding	CAGGGCAGTGCACTGTTAACGTACTTCGTTTATTGAGTTAAAATCTCTTGTAAATGTTAT	ENSEMBL_GENCODE	chr21	+	37267784	37268497
CUST_42716_PI430048170	5.33753e-06	2.10104	10.6619	10.7006	10.6688	P	P	P	9.64192	9.59419	9.58146	P	P	P	CUST_42716_PI430048170	0	Noncoding	CTCTCTGGATTACCTTGAAGTTACTCCCCTTCCCTCAATAATAATGGCATTATGAAAAAA	ENSEMBL_GENCODE	chr11	+	17380649	17383531
CUST_116256_PI430048170	0.000332052	2.20829	7.62307	7.81471	7.59756	P	P	P	6.65472	6.54541	6.40554	P	P	P	CUST_116256_PI430048170	0	Noncoding	AAAGGAATCTGCCCTCAGACACCTAGGATGCAGGGAAAAAATGGATCAGAAGAAAATTTT	lncipedia	chr13	+	78285837	78286288
CUST_79806_PI430048170	0.0268408	2.46793	8.91546	9.01126	8.26803	P	P	P	7.57235	7.41385	7.39911	P	P	P	CUST_79806_PI430048170	0	Noncoding	CTAGCCTACTCCTCAATTACTCACATAGGTAGAATAATAGCAGTACTAATTTATAACCCA	lncipedia	chr8	-	46827227	46828409
CUST_99871_PI430048170	0.00798803	0.372537	4.17666	4.22902	4.28069	P	A	A	5.70248	5.36671	5.85098	P	P	P	CUST_99871_PI430048170	0	Noncoding	GCCAAATGAAAATTGTTGAGTTAGGTCAGTAAGATTGAGTAGACAGATCCTTCTGATTTT	RefSeq	chr2	-	27889455	27891114
CUST_125286_PI430048170	0.00111547	0.41738	4.36994	4.57642	4.69247	P	P	A	5.60332	5.98731	5.82267	P	P	P	CUST_125286_PI430048170	0	Noncoding	AGGAAGTCACAGATCAGGCAACCAACCACACAAAGTTTCTAAGAGCAAACTGTTCAGGTC	RefSeq	chr8	-	375930	383174
CUST_61950_PI430048170	0.00151834	7.33657	5.19043	4.74031	4.88992	P	P	P	2.12585	2.06958	2.03542	A	A	A	CUST_61950_PI430048170	0	Noncoding	TCAAGAGACAGATATGGGAATTCTGGGACAGTAGAATAGATCTTTATAAACAACGAGTGG	lncipedia	chr15	-	57992782	58038582
CUST_107722_PI430048170	0.000611631	2.54476	5.96884	5.7167	5.78343	P	P	P	4.41905	4.54756	4.46882	P	P	A	CUST_107722_PI430048170	0	Noncoding	AAGAAACCCTCAGAAGCTTATTAAAGTTAAGAACAGTACCTGAATGTGGTCACCTGAAAC	lncipedia	chrX	+	53807775	53808623
CUST_24006_PI430048170	0.0455196	2.10439	10.35	10.3178	9.6336	P	P	P	9.04182	9.11402	9.03064	P	P	P	CUST_24006_PI430048170	0	Noncoding	ACAGAGAATGCAGTTGTCTTGACTTCAGATGCAACCTTAAAATCAGTGACAAGAAACATT	RefSeq	chr11	+	65497761	65506512
CUST_82776_PI430048170	0.00289119	2.58927	7.2989	7.40871	7.35415	P	P	P	5.82163	5.93549	6.16733	P	P	P	CUST_82776_PI430048170	0	Noncoding	AATGAATCCAGAAAGGAAGCTTCATCATTCCTCAGTGGGCATCTTTATTGGGCATCAGCG	lncipedia	chr16	-	31331805	31332797
CUST_64975_PI430048170	0.00045544	0.298776	4.8618	4.97128	4.9605	P	P	A	6.51265	6.74842	6.75087	P	P	P	CUST_64975_PI430048170	0	Noncoding	CTATGGTTGATAGACTGTGGCTTTCTTGTTGATTTCCATTTGTTGTTCATTTCCTCCAAT	lncipedia	chr19	+	47346707	47347327
CUST_108608_PI430048170	0.00505223	3.79046	7.26291	7.61993	7.8626	P	P	P	5.59309	5.77088	5.67086	P	P	P	CUST_108608_PI430048170	0	Noncoding	CTGCAAGTAATGGACGCTCTGGCTTGCCTTGGTGACTGTCAAATAAAAGCAAGTATATAC	lncipedia	chr3	-	10081319	10095347
CUST_28045_PI430048170	0.0147153	2.08582	6.4369	6.69389	6.21742	P	P	P	5.63057	4.98392	5.51278	P	P	P	CUST_28045_PI430048170	0	Noncoding	TGAGAGCCTTTCTCTGTACCTTTCCTATGGAGTTTCCTTGATTGACTGATCAATTCATTA	ENSEMBL_GENCODE	chr15	-	65083042	65083663
CUST_74826_PI430048170	0.000419838	0.332024	4.88207	4.59349	4.66546	P	P	P	6.24764	6.14757	6.50907	P	P	P	CUST_74826_PI430048170	0	Noncoding	TGTCCAGGACTCCTGGAAACAGCAGCTCTAACAAAATTGTCTTCAATAAATAAGTTTTTT	ENSEMBL_GENCODE	chr4	+	131380013	131528121
CUST_25707_PI430048170	0.00144319	0.46388	7.32614	7.34373	7.15939	P	P	P	8.33679	8.56379	8.241	P	P	P	CUST_25707_PI430048170	0	Noncoding	ATAATGCCCAGCACAGCCCACATTGTAGGTGGTGGGAAAATTCTTGTTTAAAATAAAAAA	ENSEMBL_GENCODE	chr12	-	121019111	121019485
CUST_21520_PI430048170	0.00853205	0.497893	7.11999	6.72114	6.95801	P	P	P	7.94876	7.88889	8.00504	P	P	P	CUST_21520_PI430048170	0	Noncoding	GGAGGGGGTGTATTAAAATGTCACCTTCTTTTATTACCTTTAGCCTTATCGTGGCTTTAT	ENSEMBL_GENCODE	chr8	-	140572142	140572812
CUST_104386_PI430048170	0.0393151	3.80827	5.37082	5.63739	4.90251	P	P	P	3.8456	3.65996	2.255	A	A	A	CUST_104386_PI430048170	0	Noncoding	CTCTAACATTCATTTGTACACAAAAAGGCAAGAGAAAGACTGTGAAAGCTGTCATCTATA	lncipedia	chr6	+	13949094	13949666
CUST_98833_PI430048170	0.00924738	2.32909	6.17941	5.77567	5.63074	P	P	P	4.51641	5.01584	4.36965	A	A	A	CUST_98833_PI430048170	0	Noncoding	ATCAGAAGTTGCTGTGGCTACACATATTAAGTGGTACAGAGTGTTGTGTGGATCCAGAGG	lncipedia	chr5	-	39417552	39424870
CUST_82367_PI430048170	0.00602303	2.11739	8.99759	9.08154	8.72	P	P	P	7.78903	7.8996	7.88544	P	P	P	CUST_82367_PI430048170	0	Noncoding	TCAGCATTAAGAAAAAGGAAGAAAGGGCAGACTTGATAGCTTATCTCAAAAAAGCTACTA	lncipedia	chrY	-	14941546	14941750
CUST_26952_PI430048170	0.0280365	3.72427	6.03967	6.49421	6.11567	P	P	P	4.0372	3.62178	4.98914	A	A	P	CUST_26952_PI430048170	0	Noncoding	CTGCAATTCACAAGAACAGTATATCCTGGTGATTCCTCAGAACAGAACAGACTCAAAAAA	RefSeq	chr14	-	55781134	55796674
CUST_49139_PI430048170	0.000267893	2.02147	10.8795	11.0444	10.8888	P	P	P	9.87286	9.98692	9.91037	P	P	P	CUST_49139_PI430048170	0	Noncoding	CTTCATGTGATGTTAAATCAGAAATGAGCTATTAGCCAAGCTAGTCCTCTTATGAATGAG	ENSEMBL_GENCODE	chr8	-	37326575	37330837
CUST_64238_PI430048170	0.00125668	2.08395	8.01394	7.92014	8.09241	P	P	P	6.79841	6.94546	7.09461	P	P	P	CUST_64238_PI430048170	0	Noncoding	ACCTTTCTGTTCTCAGCTTTTCTTGCCTGGAGAAGAGGGAGGGGAGAGGACAAGGGCCCT	lncipedia	chr19	-	3538649	3543382
CUST_113145_PI430048170	0.0232738	2.87768	7.44143	7.66948	6.68226	P	P	P	5.52858	5.81836	6.00554	P	P	P	CUST_113145_PI430048170	0	Noncoding	TGACTTCCAAGACATGGCCTGGATGAGAAGAAAAGAACTCAAGAAAGCAATGAAAGGAAC	lncipedia	chr17	-	8296504	8297216
CUST_46793_PI430048170	0.0158797	2.41095	6.82271	6.82469	6.14706	P	P	P	5.59108	5.22824	5.23546	P	P	P	CUST_46793_PI430048170	0	Noncoding	AGTGTCCTTCTGGAAGAGGTGAAACTTGTATGCTGATAATCCTTATCAGAAATATCTTTA	lncipedia	chrX	-	12844864	12845430
CUST_21522_PI430048170	0.000604872	0.374795	10.7081	10.4486	10.4184	P	P	P	11.8361	11.991	12.0073	P	P	P	CUST_21522_PI430048170	0	Noncoding	GGGCACTTTGTTTCTTCAAGACTAAAATGCAGGCAATGGAATAAATCATTTGTTCCTAAA	ENSEMBL_GENCODE	chr8	+	140637705	140638283
CUST_24439_PI430048170	0.0237417	4.20517	6.41297	6.57152	6.56123	P	P	P	4.03921	5.05836	3.9612	A	A	A	CUST_24439_PI430048170	0	Noncoding	GTAAATGGGCCACCATTGAGTGAAGAGGAAATTCAATAAACTGTGTTTTCCCAACTTTGT	ENSEMBL_GENCODE	chr11	+	118002348	118003037
CUST_81856_PI430048170	0.0330566	4.55442	9.72692	9.73277	8.51339	P	P	P	7.15706	7.36134	7.18946	P	P	P	CUST_81856_PI430048170	0	Noncoding	CAAGTTCTACTCAGTGAATGTAGATTACAGCAAACTGAAGAAAAAATGTTGAGACTTCTG	lncipedia	chrX	+	71848774	71849004
CUST_75152_PI430048170	0.000320631	3.2278	13.9457	13.7272	14.0529	P	P	P	12.1012	12.1168	12.4306	P	P	P	CUST_75152_PI430048170	0	Noncoding	CAGATCGCTCAGAAAATGGGAACCCAGGGCAAATTGTATGTGCTCCTTACTGGGTTTATT	RefSeq	chr5	+	473235	480891
CUST_24883_PI430048170	0.000100791	13.8857	10.4786	10.4812	10.7572	P	P	P	6.67363	6.56989	7.05799	P	P	P	CUST_24883_PI430048170	0	Noncoding	CTGCTGGGAATTCTTGCAGTTATATCCTCAAAAGACAAAATAAGCATAACCAACAGAATT	ENSEMBL_GENCODE	chr12	-	26211164	26335856
CUST_56064_PI430048170	0.031811	3.07989	8.21772	8.19229	7.29692	P	P	P	6.22435	6.38284	6.40036	P	P	P	CUST_56064_PI430048170	0	Noncoding	TTCCACCATGGAAAAGACTCAAAACCATCAACACCAAGATCAAAAGGATGAGAATCCTAA	lncipedia	chr10	+	21110681	21113388
CUST_81829_PI430048170	0.0181698	2.752	8.77375	8.83437	8.0963	P	P	P	7.22176	7.21558	6.98251	P	P	P	CUST_81829_PI430048170	0	Noncoding	TATGATTCCATAAAAGATTTTGAGGAGATGAGGAAGGTTGGTACATTTCAGAGTACAAAG	lncipedia	chrX	-	68645325	68645527
CUST_111347_PI430048170	0.0055149	2.39622	6.92668	6.65765	6.4235	P	P	P	5.35868	5.34809	5.55338	A	A	A	CUST_111347_PI430048170	0	Noncoding	TCCTGCATCCTATTCTTCTACCGAGGAGACAAGAAAAAGATCAAGATCATCAATATCTAA	RefSeq	chr5	-	7299373	7306714
CUST_7017_PI430048170	0.0296349	0.439829	3.69038	3.27791	4.20373	A	A	A	4.97174	4.73752	5.13928	P	P	P	CUST_7017_PI430048170	0	Noncoding	CTGGCCTTGCATTCCACATATATCTACTTAGAAAGGAAACTAAAGCTTAAACACAGTTAC	RefSeq	chrX	-	135520082	135520674
CUST_89998_PI430048170	0.0105926	2.60415	5.25349	5.35303	5.60953	P	P	P	4.34431	3.60702	4.05263	A	A	A	CUST_89998_PI430048170	0	Noncoding	TTTTAAAAAATGACTTCTAAGATTGCTCTTTTGCTTGGCTTGTTTGCGTGCTTGCTTTAG	lncipedia	chr6	+	87728755	87732255
CUST_36516_PI430048170	0.0213913	0.469784	5.5179	5.19293	5.0793	P	P	P	6.15954	6.06441	6.76761	P	P	P	CUST_36516_PI430048170	0	Noncoding	ACAACTACAATCTTTTCTCACAACAGACAGAGCCTGTCATTAAGTAGGCACTCAGAAATG	ENSEMBL_GENCODE	chr15	+	35926843	35926953
CUST_88575_PI430048170	0.0188399	2.06112	12.2642	12.3	11.8234	P	P	P	11.0888	11.0602	11.1537	P	P	P	CUST_88575_PI430048170	0	Noncoding	TACAAACTAAGAGTGACTTTATGGCTGCCCACCACCCTATCATACATTTGAAGAGCCAGC	lncipedia	chr10	-	69591405	69592931
CUST_81201_PI430048170	0.000388704	0.485936	7.57112	7.48793	7.33366	P	P	P	8.41804	8.61466	8.48653	P	P	P	CUST_81201_PI430048170	0	Noncoding	CACACCTCCAACATGTTTCTGTGTATATTATTGTGTGCATAGATACTACCATTGTGAAAT	RefSeq	chr9	-	113104722	113111677
CUST_111358_PI430048170	0.0334387	2.48909	10.7466	10.8165	10.0581	P	P	P	9.28664	9.27384	9.22769	P	P	P	CUST_111358_PI430048170	0	Noncoding	CTCTAAGAGCCAAGACAGCTTCCTGAAACGCGTGAGGAAAATGATCAGAAAAAGAAAGAA	lncipedia	chr17	+	43079301	43079780
CUST_122996_PI430048170	0.0232403	2.04914	4.71269	4.59928	4.32889	P	P	P	3.20235	3.91816	3.33781	A	A	A	CUST_122996_PI430048170	0	Noncoding	CTTTTCCCTTTTCAATATAATGTGGTGAAGATGTAGAGTTACTCTGTCCTAGGTAAAATC	NONCODE	chr4	+	20729805	20732554
CUST_24885_PI430048170	0.00067717	9.82427	6.4238	6.22739	6.75171	P	P	P	3.56234	3.14028	2.74508	A	A	A	CUST_24885_PI430048170	0	Noncoding	AAGAATCATCTGGATGAGTAAGAACAGTTTGAAAGTGCCAGTGACGCTGGTACAGTCCGT	ENSEMBL_GENCODE	chr12	-	26230819	26319720
CUST_90990_PI430048170	0.0109034	0.470329	4.86965	4.77705	4.53492	P	P	P	5.45712	6.01609	5.93301	P	P	P	CUST_90990_PI430048170	0	Noncoding	CCAGATTTGCTTTTATAGAGAAGTGTGTGTCACCAAAACAATGGAGATACGGTCAGAGAG	RefSeq	chr6	-	71407864	71420745
CUST_117299_PI430048170	0.000656124	0.447268	6.35919	6.19904	6.05107	P	P	P	7.32897	7.515	7.25129	P	P	P	CUST_117299_PI430048170	0	Noncoding	AGAGTCCTGGTACTGGCCAGTGCAGAGACTGCACATAGCAAGGGCTCAATGAAGTTTACC	ENSEMBL_GENCODE	chr3	+	50239618	50239984
CUST_106232_PI430048170	0.000451081	2.55482	10.2129	10.3707	10.165	P	P	P	8.87162	8.86958	8.95419	P	P	P	CUST_106232_PI430048170	0	Noncoding	CATTGAAGATCCAAGTGTGATTGGAATTCTGATATTTTCACACTGGTAAATGTTACCTGT	lncipedia	chr10	-	79870202	79871207
CUST_62580_PI430048170	0.0290764	4.7288	5.50693	5.43172	5.46211	P	P	P	2.30518	3.62146	3.43508	A	A	A	CUST_62580_PI430048170	0	Noncoding	AAATGGTGCTTGAAATAAGCATGCCACAAAGGAAAACCTGCTTTCTCGAAATGGGCCCTG	RefSeq	chr16	-	975760	981318
CUST_40206_PI430048170	0.0488793	2.39894	5.16883	5.22052	5.52111	P	P	P	4.34148	4.2917	3.29601	A	A	A	CUST_40206_PI430048170	0	Noncoding	CAGCAAAGTATCTTCTGTGGCCCCATGACTAATTTCGTTGTTTAAACTCATTATAAAAAC	ENSEMBL_GENCODE	chr12	+	76259905	76305131
CUST_21294_PI430048170	0.0150329	3.19906	7.25959	7.09591	7.05726	P	P	P	5.17228	5.1784	5.90743	P	P	P	CUST_21294_PI430048170	0	Noncoding	AATGACTCTACTGGTTCCAGGCTTCACATGCATACAACATGGTGTTGGAGGAACAGAGAT	ENSEMBL_GENCODE	chr8	-	103483398	103499220
CUST_91805_PI430048170	7.5307e-05	0.379714	7.33523	7.21219	7.33544	P	P	P	8.57867	8.72753	8.76455	P	P	P	CUST_91805_PI430048170	0	Noncoding	CCTTCTTGGTGAAGAGCAGAAACTTTGCAGTAACACCTTCAGTGAGTTCAAGGCTAGGAT	lncipedia	chr4	-	74037068	74038807
CUST_121082_PI430048170	5.38936e-06	4.39022	8.35948	8.49992	8.50349	P	P	P	6.23053	6.37195	6.35798	P	P	P	CUST_121082_PI430048170	0	Noncoding	CTCCAACAAATCCTGGCTGGATGCACTGTATGTGTTATTAATAAAACAGCTGTAAAAATA	RefSeq	chr18	-	56083355	56137536
CUST_105151_PI430048170	8.74764e-06	2.86329	6.64016	6.51467	6.54018	P	P	P	5.11024	4.98949	5.04279	P	P	P	CUST_105151_PI430048170	0	Noncoding	CCTTTGCCTGAGAGTCTTGTGACAGGAGGGTTTATGGCTTGGTTTTTGCTGACAACCCCA	lncipedia	chr2	-	224001551	224039290
CUST_7005_PI430048170	0.041883	4.66581	5.64097	5.25746	5.10653	P	P	P	2.7943	3.94171	1.99056	A	A	A	CUST_7005_PI430048170	0	Noncoding	CTGTTAACAGACTGCTTTTACACCTACGTTGTCTTGGGTTTATTGTAAGAGAGCATTATG	RefSeq	chr7	-	130877561	130913310
CUST_7524_PI430048170	6.105e-05	0.445358	8.98642	8.82309	8.90793	P	P	P	10.0505	10.0057	10.1622	P	P	P	CUST_7524_PI430048170	0	Noncoding	CTGTTCTTGCACGGACTCTTAAGCAACATGAAAATAAGGTTGACAGAAAATAAACATCAG	RefSeq	chr12	-	65758020	65826974
CUST_81854_PI430048170	0.0196381	3.45414	9.8415	9.89292	9.05628	P	P	P	7.96307	7.82566	7.77213	P	P	P	CUST_81854_PI430048170	0	Noncoding	CAAGTTCTACTCAGTGAATGTAGATTACAGCAAACTGAAAAAGAATGTCCAGACTTCTAA	lncipedia	chrX	-	71736453	71736703
CUST_104130_PI430048170	7.70095e-05	0.332337	8.96962	8.95878	8.85278	P	P	P	10.5447	10.4884	10.5182	P	P	P	CUST_104130_PI430048170	0	Noncoding	ACATTCTCAGGAACTCTCCTTCTTTGGGTCTGGCTGAAGTTGAGGATCTCTTACTCTCTA	lncipedia	chr14	+	94110735	94112133
CUST_16517_PI430048170	0.00839162	2.81816	9.12561	9.11775	9.18481	P	P	P	7.46782	7.50291	7.92736	P	P	P	CUST_16517_PI430048170	0	Noncoding	CTGTGTCTTCTCATGATGAGTCCTAAAAATAAGCCAAAATACTACTTAATCTCCATCACT	ENSEMBL_GENCODE	chr4	+	138105719	138169407
CUST_104988_PI430048170	0.0189495	2.54644	10.74	10.732	10.17	P	P	P	9.19303	9.25406	9.21933	P	P	P	CUST_104988_PI430048170	0	Noncoding	CTAGAGGCCTGGGAGTTGGAGTTTTATCTTTGGAAAATCAAGGCCCAGAAAGGCAAATAA	lncipedia	chr3	-	57530344	57530967
CUST_102142_PI430048170	0.000959434	2.53598	7.55704	7.7896	7.66158	P	P	P	6.11357	6.45074	6.40318	P	P	P	CUST_102142_PI430048170	0	Noncoding	GCGGCTCACCTGGTGTCTTGGTTCCTGCAAGCCTTGAAAAGATCTTTTGAGGTCGAGGAG	lncipedia	chr17	+	77375920	77402089
CUST_124680_PI430048170	0.00403868	2.32011	7.0129	7.21403	7.11781	P	P	P	6.1441	5.78586	5.7449	P	P	P	CUST_124680_PI430048170	0	Noncoding	AAAGAAGAATTTGGACGATTTGCCAGCTTTGAGGCTCAAGGTGCATTGGCCAACATAGCT	NONCODE	chr6_GL000254v2_alt	+	3780838	3784161
CUST_123128_PI430048170	0.00474354	0.398433	5.00113	4.62068	4.7568	P	P	P	6.17839	6.36284	5.78799	P	P	P	CUST_123128_PI430048170	0	Noncoding	GCTTTGTGTTTATCAGTGCTTTGACCAGCAGCTATTCATTTGTGATATGAAACTCTTAAA	lncipedia	chr4	+	108557232	108560392
CUST_66110_PI430048170	0.00240016	0.128155	3.15069	3.76658	2.85907	A	A	A	6.0431	6.24913	6.49355	P	P	P	CUST_66110_PI430048170	0	Noncoding	AGGAATCTTCCCCTAAAGCCCTAACATTTGTGTCCAAGGCAGAGTTTGAGAAGCTAGTTC	lncipedia	chr2	+	85694903	85696532
CUST_51137_PI430048170	0.0148026	2.80645	6.52322	6.34578	6.75033	P	P	P	4.54637	5.07346	5.42888	P	P	P	CUST_51137_PI430048170	0	Noncoding	GTAGGCTGTTTCATTGAACTGAAATGCAAAAGTAAACCGGAGATGTAAGTTGTCACAAGA	RefSeq	chr1	-	64094441	64112205
CUST_24873_PI430048170	0.000383339	2.58092	9.86357	9.66571	9.63351	P	P	P	8.21658	8.31303	8.5232	P	P	P	CUST_24873_PI430048170	0	Noncoding	CATTTAGCCACTGTTACTGATAATTTGGATGGAAAAGAAAAATAAATTATATCACCTCTC	ENSEMBL_GENCODE	chr12	-	25944857	25958578
CUST_116391_PI430048170	0.0025672	0.292768	5.45178	5.60914	5.18707	P	P	P	7.1752	7.14715	7.27034	P	P	P	CUST_116391_PI430048170	0	Noncoding	GGAAGAATTCTACAGTTAGAGATTAGTTGGTTTCAAAGGATTTGTCTCTTGTTCAAAGCA	lncipedia	chr12	-	81675485	81687560
CUST_107910_PI430048170	0.000396483	3.41729	10.7002	10.4681	10.6086	P	P	P	8.68367	8.73494	9.02512	P	P	P	CUST_107910_PI430048170	0	Noncoding	TCTCCTGAATTTTGTTTGCTATAGTGACCCTGTAGGCGCGTTTAAAATGAGGGAAGCAGC	RefSeq	chr5	+	473235	480891
CUST_30902_PI430048170	0.000548298	2.18409	6.2696	6.14132	6.39962	P	P	P	5.05166	5.17638	5.20826	P	P	P	CUST_30902_PI430048170	0	Noncoding	TTTTATTCCACGAGGAGGAGTACCTGGAAATTAGATGATTACCACATGCTGAGGGCACCT	ENSEMBL_GENCODE	chr17	+	68413740	68428763
CUST_21138_PI430048170	0.00654313	2.04124	5.65495	5.43342	5.60171	P	P	P	4.44923	4.33935	4.78429	A	A	P	CUST_21138_PI430048170	0	Noncoding	GGCACATTCTAGATGGAGGCACATTCTAGAAACGCTTGAAACTGTGTGTTGCTTTGGACA	ENSEMBL_GENCODE	chr8	-	89628165	89757194
CUST_61787_PI430048170	0.0354477	0.43448	4.5024	3.99838	3.66887	P	A	A	5.3087	5.32267	5.26934	P	P	P	CUST_61787_PI430048170	0	Noncoding	TAATAAAGGTTGTGAATTCCAAATTCCTAGCCGAATATGGCTTTGCTGGTAAGCCCCCTG	lncipedia	chr15	+	41897098	41900154
CUST_4099_PI430048170	0.0080038	2.39929	6.59526	6.48479	6.749	P	P	P	5.42861	5.00203	5.56502	P	P	P	CUST_4099_PI430048170	0	Noncoding	ATGGTAAGTAGGCTGTTTCATTGAACTGAAATGCAAAAGTAAACCGGAGATGTAAGTTGT	RefSeq	chr1	-	64094441	64112205
CUST_53881_PI430048170	0.0187725	2.01083	8.91006	8.25812	8.68232	P	P	P	7.43035	7.67152	7.77757	P	P	P	CUST_53881_PI430048170	0	Noncoding	ATCACTCTTTGGATACTGGTGAAATCCCATTACATCTGAGATAAGGGAACAGGGAAAAAA	lncipedia	chr1	-	41933942	42034138
CUST_66444_PI430048170	0.0238271	2.15005	5.94401	6.10608	5.3452	P	P	P	4.86185	4.44512	4.84387	P	P	P	CUST_66444_PI430048170	0	Noncoding	AGCTACAGTATCAGTCTTCACAAGTATAGGGAGATGTAGATTCTTATTCTATACATGGAA	lncipedia	chr2	-	116726452	116726771
CUST_100215_PI430048170	0.0162555	4.2766	5.11537	5.23573	4.90195	P	P	P	2.27425	3.34504	3.15515	A	A	A	CUST_100215_PI430048170	0	Noncoding	CTTAGGATTTAACCCCATAAGATTAATTTTCCCCATAGGAAACTGTTACTGACCTGTAGA	lncipedia	chr6	-	2965088	2967178
CUST_30581_PI430048170	0.0462557	0.495059	4.01692	4.82706	4.79868	A	P	P	5.65954	5.427	5.71942	P	P	P	CUST_30581_PI430048170	0	Noncoding	TTCTTCTAGGTATCAGTAGCAAATTCAAAAACTACAGAATCAGCTCCAGAGGACTTTGTT	ENSEMBL_GENCODE	chr17	+	45261777	45268059
CUST_26969_PI430048170	0.0220653	2.87811	5.48039	6.18754	5.16558	P	P	P	4.24284	4.50341	3.54742	A	A	A	CUST_26969_PI430048170	0	Noncoding	CTTGCTCATTGCTGAATCTCCAGCACCTAGAATAGCATTTGGCATATAGCAAACATTCAA	RefSeq	chr14	+	56813182	56930832
CUST_109142_PI430048170	0.0103943	0.413727	4.30041	4.05744	4.65756	P	A	P	5.56975	5.75758	5.563	P	P	P	CUST_109142_PI430048170	0	Noncoding	AAGTCCATTTCCGAATGATGGGTGTTTGCATTTATCCAGTGGAGCTGCTGTTCATGGAGA	lncipedia	chr10	-	4232949	4233789
CUST_80163_PI430048170	0.00620469	2.33212	7.87846	7.37603	7.34389	P	P	P	6.06829	6.34623	6.54427	P	P	P	CUST_80163_PI430048170	0	Noncoding	GCTAGTGTAGGAAGATTAACATCCATTGTAATTGAGCTTAAGGCACAAAATACTAGTAAC	lncipedia	chr8	-	104504243	104588995
CUST_109148_PI430048170	0.00736638	2.10617	12.4375	12.4519	12.1411	P	P	P	11.3078	11.2446	11.2744	P	P	P	CUST_109148_PI430048170	0	Noncoding	GAGCTCCCAATTGCACCTGAAATTGCACTAGAACTGTTAATGGATGTGAGCTTCCTAGAT	lncipedia	chr10	+	10174229	10174577
CUST_11723_PI430048170	0.00227833	2.17699	6.1672	5.90715	6.15729	P	P	P	4.87724	4.78937	5.18264	A	P	P	CUST_11723_PI430048170	0	Noncoding	ATTTTACAACACGAGCGAATAAATCATCTCCAAACCAACAAGATGTCACCTTCAGGCTCC	ENSEMBL_GENCODE	chr1	+	170667381	170669425
CUST_97070_PI430048170	0.00213534	3.50346	8.39278	8.44155	8.45839	P	P	P	6.42283	6.67865	6.74595	P	P	P	CUST_97070_PI430048170	0	Noncoding	TGGGAGGAGCACTGCAAATTTCACTTTGGACACGTGAGTCAGAGAAATCTGCCTCCTGGG	lncipedia	chr5	-	180808838	180815541
CUST_19759_PI430048170	0.00564589	0.477537	6.84605	6.80769	7.14218	P	P	P	7.94553	8.01031	8.06047	P	P	P	CUST_19759_PI430048170	0	Noncoding	AGACACTGCTTATGGCTTGGATTGCTTAGGCCGTAGATTGATCATTAATCTTTAGGACGG	ENSEMBL_GENCODE	chr7	-	46687879	46697122
CUST_3934_PI430048170	0.000688072	0.355492	6.13082	6.13359	5.87385	P	P	P	7.61266	7.4674	7.54599	P	P	P	CUST_3934_PI430048170	0	Noncoding	AAGGTCTCCTGTGACTGTTTTATTTTTAGGGAAACAGAGAGGAAGAAGAATGATTTTTCT	RefSeq	chr21	+	36005319	36008295
CUST_16907_PI430048170	0.000320071	3.15534	10.0086	9.83457	9.98233	P	P	P	8.26672	8.13256	8.44211	P	P	P	CUST_16907_PI430048170	0	Noncoding	ATCCTTCAGGTTCAGCTCGTGGAAGACATTCAGGATCCGGTCTCGAGACTTCTGGGCCGA	RefSeq	chr5	+	473235	480891
CUST_82954_PI430048170	0.00208901	0.42089	4.50302	4.83456	4.40459	P	A	A	5.81688	6.03928	5.63947	P	P	P	CUST_82954_PI430048170	0	Noncoding	CTTTCTTCCTGGAGCGGAGCGCAGGCGCCGAGACTGACAACGCGGTCCCACAGTCAAATA	lncipedia	chr16	+	58392697	58393673
CUST_100863_PI430048170	0.0043714	3.22131	5.82567	5.86728	5.40722	P	P	P	4.01182	3.95416	4.11023	A	A	A	CUST_100863_PI430048170	0	Noncoding	GGTTGATTAATTAAAAGAGCAGCAAGAATGGCATTTTAACTCTTCTGGTTTTTGGGGTTT	lncipedia	chr7	+	66493689	66495524
CUST_38125_PI430048170	0.0321505	4.32426	5.53271	5.04531	5.25731	P	P	P	2.40004	2.70722	3.94277	A	A	A	CUST_38125_PI430048170	0	Noncoding	ACCCAGGGATTTGCCACAGTAGGAAGACATGACCACTACTAGGATAGAGAGGTAAAAAAT	RefSeq	chr3	-	72035518	72100455
CUST_81914_PI430048170	0.0109061	2.31735	8.12907	8.30345	7.77816	P	P	P	6.77932	6.92671	6.91124	P	P	P	CUST_81914_PI430048170	0	Noncoding	GAAGAGAGACAATTCCTGCAGAACAGGACATAACTACAAAAATGTTTCCATTGGAATTGC	lncipedia	chrX	+	80709927	80710705
CUST_41541_PI430048170	0.00376743	0.498711	5.61744	5.28346	5.27191	P	P	P	6.31363	6.36558	6.52374	P	P	P	CUST_41541_PI430048170	0	Noncoding	CACTTTTCTTCCTGCAGAAGTTAGAACTCTTTTAGACAAGCTTAACACTTCAAAACTGTA	RefSeq	chr6	-	71407864	71420745
CUST_113682_PI430048170	4.65982e-05	24.8652	7.15619	6.76507	7.19604	P	P	P	2.48989	2.63886	2.05721	A	A	A	CUST_113682_PI430048170	0	Noncoding	TTGCAGAATGAAACCTTTGTTTCCAGAAGCACTGCTGACTGTAAGTGGTTGCCGTTTGTG	RefSeq	chr9	-	38540566	38545372
CUST_36698_PI430048170	0.0043113	2.14414	14.2264	14.2241	13.876	P	P	P	13.1176	12.9934	12.9357	P	P	P	CUST_36698_PI430048170	0	Noncoding	CTTCAGAAGGAAAGAATGTTTTGTGGACCATTTTGGTTTTTTCTGGTATGTGGTCATTTT	ENSEMBL_GENCODE	chr11	+	29276689	29276805
CUST_114884_PI430048170	0.0225216	2.43255	6.76162	6.42672	6.3092	P	P	P	4.68854	5.60999	5.24575	P	P	P	CUST_114884_PI430048170	0	Noncoding	GCAGAACACGACTTAAAAGTGGCTTCAGAGGAAAAGCAAGAAACGCTTGAAAGAAGTGAA	lncipedia	chr3	-	198059249	198064022
CUST_112515_PI430048170	0.0469014	2.05892	7.90719	7.7988	7.15853	P	P	P	6.55076	6.61749	6.67514	P	P	P	CUST_112515_PI430048170	0	Noncoding	AGTGGAATCCAAATGTCATTCAATCTGCTCACTTCTGTACTTCACTCTGCAGAAACAAAA	lncipedia	chr17	+	19208583	19211359
CUST_69403_PI430048170	0.0322665	2.07677	8.17077	8.10498	7.56062	P	P	P	6.8808	6.95167	6.91413	P	P	P	CUST_69403_PI430048170	0	Noncoding	AAGTCCAAGGAGGTCAAGACCAAGATCCCAAAGGGCATTAGGTGCAAACTCAATCAACTT	lncipedia	chr2	-	176809425	176809859
CUST_87316_PI430048170	0.00304572	0.339806	12.1673	12.0543	11.7035	P	P	P	13.6192	13.427	13.5829	P	P	P	CUST_87316_PI430048170	0	Noncoding	ACAGTGTCATTCAATAAAGTGCACGTGCTTGTGATGATGCTGTGACTTCATCTGGAGTGG	lncipedia	chr11	+	308652	315629
CUST_5257_PI430048170	0.000218852	3.6912	7.12015	7.13758	7.26083	P	P	P	5.30538	5.13529	5.41598	P	P	P	CUST_5257_PI430048170	0	Noncoding	GTGGTGCTGACTTTCCGACTCAGAATATGATCACATGTTTTTCTCATTAAAACTATATTG	RefSeq	chr5	-	38710366	38720273
CUST_125707_PI430048170	0.000200115	2.5804	7.82063	7.5993	7.7441	P	P	P	6.20781	6.38028	6.46968	P	P	P	CUST_125707_PI430048170	0	Noncoding	AAGAGTCTCAAAGAAGCTGGCTGGATAAAGCCTGCTGTGGATGTCTTTATATTCAAAGAT	lncipedia	chr9	-	38566259	38568009
CUST_61957_PI430048170	0.0394479	2.08591	4.97629	5.09357	4.85838	P	P	P	3.87124	4.30871	3.44826	A	A	A	CUST_61957_PI430048170	0	Noncoding	AGGAAAGTCCATACCAAAAACCATTTCACAAACTCATATAATCAGCCTCCATTACCATAC	lncipedia	chr15	+	58152605	58154407
CUST_10793_PI430048170	0.00127181	2.05623	8.67979	8.65146	8.94922	P	P	P	7.58523	7.73756	7.84504	P	P	P	CUST_10793_PI430048170	0	Noncoding	TTAGAAGAAAGAAAGAGATGACTCCTGCTTCATAGTCCAGGAAAATCCCCACACACCGTG	ENSEMBL_GENCODE	chr1	-	42841898	42846387
CUST_122851_PI430048170	0.00098188	3.74244	7.6929	8.10775	8.07002	P	P	P	5.8905	6.37186	5.87444	P	P	P	CUST_122851_PI430048170	0	Noncoding	TCATAATTGTGGTCACTAGAACTGTACTTACCATGGACAGTTAAAACTGAAAAAGACTCA	ENSEMBL_GENCODE	chr3	+	152839390	152841439
CUST_37807_PI430048170	0.0255322	3.41313	6.11701	5.50933	5.33709	P	P	P	4.22487	3.02036	4.22583	A	A	A	CUST_37807_PI430048170	0	Noncoding	GCAACTTGTACTCATTGGATCTGGAGCCTCTAGCTTTTAATATTTTATCACTAAATGCTT	lncipedia	chr1	+	61124485	61131643
CUST_20819_PI430048170	0.00584543	0.465113	6.62955	6.6922	6.62789	P	P	P	7.93963	7.62413	7.67984	P	P	P	CUST_20819_PI430048170	0	Noncoding	GAGGCATTGCTGGCACCCCGTGGGGACTGAGGACCAAGGAGGAGCTGCTCCCCCACACAC	ENSEMBL_GENCODE	chr8	+	49168682	49225029
CUST_41930_PI430048170	0.000618667	0.0930202	3.01163	2.14706	2.55332	A	A	A	5.87982	5.80591	6.36788	P	P	P	CUST_41930_PI430048170	0	Noncoding	AACATTCAAGCAGAACCCAGGGATACTATGCAGAAAGTCTTTCAATTTGAATACTTTACT	lncipedia	chr6	+	155523734	155526070
CUST_39572_PI430048170	0.0118998	0.452022	3.73583	4.35402	3.88509	A	A	A	4.98692	5.30848	5.17237	P	P	P	CUST_39572_PI430048170	0	Noncoding	AGTGGTCACTAATTAATCCAGGTGTGGCTAGGAACAGCTGGATACTGATCTGTGTGATGA	RefSeq	chr4	-	184843295	184847046
CUST_82424_PI430048170	0.0197662	2.28777	7.81387	7.80623	7.14082	P	P	P	6.22391	6.10277	6.83803	P	P	P	CUST_82424_PI430048170	0	Noncoding	TAAATTCCCATTTCACCTGAAACTGCAGTAGAACTGTTGATGGCTGTGAACTTTCTATAT	lncipedia	chrY	+	22068819	22069151
CUST_82962_PI430048170	0.0140415	5.05975	5.64913	5.93047	4.7593	P	P	P	2.92979	3.19554	3.39824	A	A	A	CUST_82962_PI430048170	0	Noncoding	TCTTGGGTGGTACCATCCTACACGCAAACTAATCTGAAATCCTTTCACCTAGGGATAATG	RefSeq	chr16	-	59754140	59755191
CUST_121755_PI430048170	2.77735e-05	3.07487	6.94573	7.05324	7.12991	P	P	P	5.35004	5.52631	5.39091	P	P	P	CUST_121755_PI430048170	0	Noncoding	GTAGTGGAGGAATAGTAAGAAAATTCTTAGTGCTGGCTTAGCTTCATTGATCCAAAAACA	lncipedia	chr2	+	130681227	130691691
CUST_14927_PI430048170	0.0304922	2.54033	6.53573	6.83265	6.67468	P	P	P	4.90372	5.10324	5.84041	P	P	P	CUST_14927_PI430048170	0	Noncoding	TATTTCTAATAATGCTCCTGGCTCCACGCTTCCAGATGGACAGTCCCAAAGAGAATGACT	ENSEMBL_GENCODE	chr3	+	72152759	72172099
CUST_48673_PI430048170	0.000399386	2.27757	8.9822	8.82119	8.98434	P	P	P	7.67843	7.64929	7.89123	P	P	P	CUST_48673_PI430048170	0	Noncoding	GGAGGGAATTGGATTTTTGGAAAAGATTGTGGCAAAATACAAAATATAAAATACAAAAAT	lncipedia	chr21	+	33931633	33978859
CUST_17616_PI430048170	0.00303252	0.460149	5.68829	5.44997	5.53708	P	P	P	6.48692	6.6342	6.89408	P	P	P	CUST_17616_PI430048170	0	Noncoding	ACTGATGCCTGCAAGTCAACAGCATAAAGAGTGGTAAAGTCAGTGCTGCAAAAGATGAAA	ENSEMBL_GENCODE	chr5	+	97881428	97922695
CUST_84104_PI430048170	1.24914e-06	10.1809	5.55902	5.46353	5.41455	P	P	P	2.07474	2.14584	2.17505	A	A	A	CUST_84104_PI430048170	0	Noncoding	TAAACTTTTGTCACTCTGCCATGAAAAGCATCCAGGCGTCCTTGATTTCGACATTGCGTG	RefSeq	chr9	+	38621087	38623280
CUST_84782_PI430048170	0.021798	0.322077	3.84394	3.21757	4.31607	A	A	P	5.49242	5.6987	5.2614	P	P	P	CUST_84782_PI430048170	0	Noncoding	GCTCTGAGAGGCTGTATTTCTTACATTAAAGACAGCCCAACACTGGCATCCATTTATATA	lncipedia	chr17	+	44975425	44975640
CUST_61465_PI430048170	0.000438071	3.57944	6.72522	7.00011	6.82597	P	P	P	5.23267	4.83357	4.94967	P	P	P	CUST_61465_PI430048170	0	Noncoding	AAGATGAGTTCATCTGCCGTGCAGTCCATGAGGCAGCGAGCCCCTCACAGACCGTCCAGC	lncipedia	chr14	-	105719617	105721937
CUST_72776_PI430048170	0.0257931	2.15842	6.28352	5.97857	5.80217	P	P	P	4.40245	5.23216	5.01887	A	A	A	CUST_72776_PI430048170	0	Noncoding	AATGTGTTTCACTGTTAACATTGTCACTAGTTAAAAGCTCCATTTGTACGTTGTAGTGAC	lncipedia	chr3	-	27397864	27401044
CUST_95954_PI430048170	0.0240782	2.05823	6.47448	6.60542	6.20021	P	P	P	5.04062	5.24225	5.79364	P	P	P	CUST_95954_PI430048170	0	Noncoding	GCTCTCTATACCTACCGCTAATGTAGAGGATTATTTATTTTCATTTCATTACCATTCGTG	lncipedia	chr9	+	73168097	73170393
CUST_77585_PI430048170	0.027366	2.08664	9.28018	9.37034	8.78236	P	P	P	8.05154	8.14123	8.12161	P	P	P	CUST_77585_PI430048170	0	Noncoding	CTTCTGTATGACTGATCAGGAGGCTATTCAAGATCTCTGAATAAGGAAATCTCTTTAAGA	lncipedia	chr6	-	104025539	104026763
CUST_113429_PI430048170	0.03277	0.437598	4.38087	4.51136	3.69588	A	A	A	5.47076	5.2966	5.51381	P	P	P	CUST_113429_PI430048170	0	Noncoding	GGTGGAAAGATCCGTATCCTCAATGGTTTTGCATATTCAGTATAAGAATTTGCTTTTTCA	lncipedia	chrX	-	120309892	120311402
CUST_125758_PI430048170	6.30732e-06	5.46181	9.16062	9.01619	9.20423	P	P	P	6.59462	6.66346	6.77566	P	P	P	CUST_125758_PI430048170	0	Noncoding	TGGGGCCTAATGATGTTTCAAATCAAATCACTCTGTAGGGGATTTTCCATTTAACATATT	ENSEMBL_GENCODE	chr9	+	90997054	91001871
CUST_98791_PI430048170	0.0213212	2.10595	8.93756	9.01052	8.38426	P	P	P	7.75236	7.84777	7.57289	P	P	P	CUST_98791_PI430048170	0	Noncoding	AACAAAAGTAATCTGGGGAAAGGTAACCTGTGTCCATGGAAACAGTGGCATGATTTGTGC	lncipedia	chr4	+	163382178	163382516
CUST_120778_PI430048170	0.0018534	0.466269	6.58597	6.55429	6.48765	P	P	P	7.57634	7.79092	7.55253	P	P	P	CUST_120778_PI430048170	0	Noncoding	CCCGTCCCAGGAGTGAAGGCCAAGAAGCCCATCCAGACTAAGTTCCGAATGCCACTCTTG	NONCODE	chr17	+	45242291	45242390
CUST_61834_PI430048170	0.0326174	4.12049	5.06467	5.02007	4.90907	P	P	P	3.54715	2.13452	2.84963	A	A	A	CUST_61834_PI430048170	0	Noncoding	CTGAAGAAGAAAATGAAACAAAAATCTTAGACTTAGAGCCTTTGAGGAATTCTTGCCATC	lncipedia	chr15	-	45306482	45307446
CUST_60791_PI430048170	0.0111437	2.14451	12.7013	12.7799	12.2911	P	P	P	11.4708	11.6123	11.4267	P	P	P	CUST_60791_PI430048170	0	Noncoding	GTTCTGAGAAAGCTACTGGACATAAGACAGGTGCCAAAGTTGAATGAGCTGATGGATATG	lncipedia	chr14	+	35468271	35469330
CUST_51714_PI430048170	0.0180896	2.44366	5.08161	4.86601	4.81248	P	P	P	3.89	3.16121	3.75689	A	A	A	CUST_51714_PI430048170	0	Noncoding	AACTATGAATGCTTTACCAGTTGTGAGTTCCTCAAATACACCCTGTTGGTGAAGCAGGGG	lncipedia	chrY	+	13753097	13871706
CUST_76134_PI430048170	0.0109736	3.00202	5.62694	4.9236	5.63306	P	P	P	3.96397	3.61871	3.92722	A	A	A	CUST_76134_PI430048170	0	Noncoding	GGGAGCTGATAGGTTTTTAAATAGGACTCTTGACTGAACATTTTCTTTCTCTATTTCTTC	lncipedia	chr5	+	146055821	146060151
CUST_11980_PI430048170	0.00531673	0.488138	5.10885	5.01732	4.66355	P	P	P	5.86375	5.91805	6.13464	P	P	P	CUST_11980_PI430048170	0	Noncoding	CTTCTCACCATTGTCTTGCATGTTTCCTTGTGTGAACCACAAATAAACTTTTGTTATGTT	ENSEMBL_GENCODE	chr1	-	209661364	209675247
CUST_21395_PI430048170	0.0360773	0.499356	3.43024	4.09889	4.19577	A	A	P	4.90592	4.79543	5.1231	P	P	P	CUST_21395_PI430048170	0	Noncoding	TTGTCCAAGTCTACCAGGATTCAAGTTCATTTCAGAAAAGCAGTGGCCAGAAACCAAGGC	ENSEMBL_GENCODE	chr8	-	124834884	124857516
CUST_70182_PI430048170	0.00968963	2.57349	8.7722	8.784	8.32812	P	P	P	7.28969	7.32706	7.21939	P	P	P	CUST_70182_PI430048170	0	Noncoding	TAAGAAGAAGACAGAAAGGGCAGACTTGATAGCTTATCTCAAAAAAGCTACTATTGAGTA	lncipedia	chr14	+	76633713	76634028
CUST_118396_PI430048170	0.00048148	0.480802	5.16188	5.03311	5.00377	P	P	P	6.21987	5.98487	6.15825	P	P	P	CUST_118396_PI430048170	0	Noncoding	GATATACAATTCCAACAGATCACTCTCACTAGCCAATATGAGACACAGTCAATTTCCCTA	NONCODE	chr1	+	89181498	89181711
CUST_123412_PI430048170	1.36983e-06	0.155769	2.0603	2.13356	2.15158	A	A	A	4.76431	4.81042	4.81926	P	P	P	CUST_123412_PI430048170	0	Noncoding	ATTTTTCTTTATCATTGCGATCACCATCTGAACGTAAGGAGTGCACTTGTTTGGAAGTTC	NONCODE	chr5	-	37812677	37814089
CUST_68539_PI430048170	8.68344e-06	0.386811	11.0381	10.969	11.0621	P	P	P	12.4599	12.3688	12.3506	P	P	P	CUST_68539_PI430048170	0	Noncoding	CTGGCTACAGCCCTCAAAAACAGCTTATACTCTTAAGACTAATTTTGAAATAAAACCTTC	lncipedia	chr11	-	125445749	125451520
CUST_69738_PI430048170	0.0132721	2.22929	11.0843	11.1442	10.6018	P	P	P	9.87703	9.67511	9.8587	P	P	P	CUST_69738_PI430048170	0	Noncoding	GCGGCAGTGGTCATTTGACAACAAAAGTCATACCGGAGAAAATATAACATTTAAAAAGAA	lncipedia	chr10	+	33864312	33864723
CUST_90633_PI430048170	0.000355591	13.6396	6.43197	5.99873	6.25708	P	P	P	2.8563	2.19414	2.26543	A	A	A	CUST_90633_PI430048170	0	Noncoding	ACTTTCACAGCCAGATGAAAATGGACGTTTTGACAATGGCTCACAGATTCCTGGAGATGT	lncipedia	chr15	-	58138446	58279227
CUST_78652_PI430048170	0.00895441	0.308552	5.57134	5.59659	5.57404	P	P	P	7.12024	7.07585	7.57958	P	P	P	CUST_78652_PI430048170	0	Noncoding	TTGTCCAGTGTGGTGAAGGTGACATTTCCAAATCTGAGCATTGGACATCAGTGTGTCTGT	RefSeq	chr7	+	73220638	73235945
CUST_71376_PI430048170	0.00613209	2.16692	6.11833	6.21216	5.72051	P	P	P	4.60777	5.04025	5.05828	P	A	A	CUST_71376_PI430048170	0	Noncoding	ACCAAACATACCAAGTTCATGCAGGACATGATCTGAGAGGTGAATGGCTTTGCTCCATGT	lncipedia	chr20	+	52890161	52890386
CUST_107787_PI430048170	0.000547587	5.01555	10.3564	10.5521	10.3635	P	P	P	8.1098	8.11339	8.07795	P	P	P	CUST_107787_PI430048170	0	Noncoding	AGAACTGATGAATAGCAGTGAACGCATTATGTGTGCCCTACAACCATCATGATCTACAGA	lncipedia	chr3	+	189309893	189315595
CUST_124187_PI430048170	0.00540813	3.29521	4.76552	5.03957	4.7632	P	P	P	2.75401	3.14028	3.44807	A	A	A	CUST_124187_PI430048170	0	Noncoding	TAATAACCCAGTAAAGAGTCAACAAGAAGATCAACTAATAGCAGGGGCACAGAATGAAGT	NONCODE	chr6	-	108551017	108551207
CUST_94889_PI430048170	0.0404276	2.81877	8.77265	8.90461	7.94192	P	P	P	7.06679	7.15075	7.09009	P	P	P	CUST_94889_PI430048170	0	Noncoding	CAGAAAATGTGTGGATGGTATTTACGTCTCTGAAAAAGGAACAGTTAAGCAGGCTGCTGA	lncipedia	chr8	-	17150300	17150888
CUST_94879_PI430048170	0.00208868	2.58202	6.30952	6.23581	5.93046	P	P	P	4.83711	4.68471	4.86914	P	P	A	CUST_94879_PI430048170	0	Noncoding	TGAGCCTAATTTCTTTCTGTTGCTTCATTCTAGGACTGTGAGGAATGTATCCAGCTGGAG	lncipedia	chr11	+	64202404	64203144
CUST_114339_PI430048170	0.0255974	2.05181	8.30417	8.40525	7.82906	P	P	P	7.22802	7.15033	7.10997	P	P	P	CUST_114339_PI430048170	0	Noncoding	GACTTCTCTAATGCAAGGGACCATTGCATGGCCCACAAATCCTTTAACAGTTTGAAATGA	lncipedia	chr6	-	31611082	31611356
CUST_97294_PI430048170	0.0371102	2.07013	9.00174	8.98118	8.29657	P	P	P	7.70275	7.89008	7.62996	P	P	P	CUST_97294_PI430048170	0	Noncoding	GTCCAAGGATTATATGGAAGGTCTTTGGGTGTTTGACAAGGAAGAGAAGGGCACCATCAT	lncipedia	chr21	+	39488326	39488760
CUST_125607_PI430048170	0.000312374	0.423155	6.88845	6.94547	7.11781	P	P	P	8.15632	8.30635	8.21731	P	P	P	CUST_125607_PI430048170	0	Noncoding	AGAACCAGCTCGGAGGACAACCTGTACCTGGCTGTGCTCAGGGCCTCTGAGGGCAAGAAA	NONCODE	chr8	-	143939350	143939461
CUST_23505_PI430048170	0.00185023	0.458036	4.07992	3.93265	3.87695	P	A	A	4.88444	5.1464	5.22424	P	P	P	CUST_23505_PI430048170	0	Noncoding	TTCAGCAGGAGCCCTGGACTCATCATCAATAAACACTGTTACAGCAATTTGTCTCGAGGA	ENSEMBL_GENCODE	chr11	-	1995163	1997875
CUST_119091_PI430048170	0.000245553	2.09739	7.80732	7.60709	7.66635	P	P	P	6.63986	6.54812	6.6908	P	P	P	CUST_119091_PI430048170	0	Noncoding	AAGCAGCACAACCTCTGCCACTACAACCAGTAGAATCTCTGGTCCTGAAACTACTCCCAG	NONCODE	-	-	-	-
CUST_106967_PI430048170	0.0429275	2.97359	8.72936	8.93116	7.77209	P	P	P	7.17768	6.94625	6.8113	P	P	P	CUST_106967_PI430048170	0	Noncoding	AAACGGCACAGAAATGGTATCAAGAAACCTCAGTCACAAAGATCGGTGTCTCTAAAGGGG	lncipedia	chr15	-	70796630	70797099
CUST_32804_PI430048170	0.00102365	2.94245	6.13176	6.17546	6.52187	P	P	P	4.87471	4.69435	4.60853	P	P	A	CUST_32804_PI430048170	0	Noncoding	CAGGTGTTTTTCTTTTAATTTCCCTAAGTGCATGTAGCAAAGAGAGTGCAATATTTGCTT	ENSEMBL_GENCODE	chr19	-	51639478	51639931
CUST_22885_PI430048170	0.000881931	6.26506	5.45394	5.25045	5.06714	P	P	P	2.23838	2.896	2.64643	A	A	A	CUST_22885_PI430048170	0	Noncoding	ACTGTGGAGACTTCACAGAAATGGCAGAAGCTAGTTGAAGTCTACAAATTACCTAATGGA	RefSeq	chr10	+	61452638	61493431
CUST_68225_PI430048170	0.00298702	3.23641	6.17744	6.62578	5.99946	P	P	P	4.76414	4.64139	4.35848	P	P	A	CUST_68225_PI430048170	0	Noncoding	CAAAACTAAGGAATGAGTTACAGTGGAAAGAAGTCCAGAAGCACTTGATAAAGCTGAGCC	lncipedia	chr1	-	81557120	81557832
CUST_17617_PI430048170	0.00373937	0.489056	5.1117	4.95364	5.17198	P	P	P	6.11815	6.12037	6.10324	P	P	P	CUST_17617_PI430048170	0	Noncoding	GGCCTTACAAAACGGGAGCAAATCTTAACCAATCATTGTAGCAAAACCTTTTGTTTATGA	ENSEMBL_GENCODE	chr5	+	97881428	97922695
CUST_92563_PI430048170	0.000829391	0.147293	2.51587	2.63584	2.42551	A	A	A	5.0851	5.17693	5.56623	P	P	P	CUST_92563_PI430048170	0	Noncoding	CCCCTGGGATGGCATAGAAGAGACTTTAAAACCAAATGAGCCAAGACTCCAAGCTCTGAC	lncipedia	chr2	+	85694425	85697101
CUST_14922_PI430048170	0.00870377	4.28016	4.44334	4.66166	4.99258	P	P	P	2.0781	2.43978	3.13526	A	A	A	CUST_14922_PI430048170	0	Noncoding	CTCTTTCACAGCCTTACCTTTTCATATGGAGGAAGAAAAAACCCATTTCTATAAAGCTAT	ENSEMBL_GENCODE	chr3	-	72097728	72100957
CUST_57575_PI430048170	0.00608961	0.470223	7.72084	7.61664	7.26703	P	P	P	8.51675	8.75168	8.63038	P	P	P	CUST_57575_PI430048170	0	Noncoding	CAGCAGTTTCTAGAAACTAAAACCACTAGATCTTTTTCACTAGCATGCTTCACAATTAAC	lncipedia	chr11	+	60378548	60383666
CUST_118845_PI430048170	0.00162891	0.372628	6.05602	5.80553	6.00516	P	P	P	7.34267	7.40744	7.40027	P	P	P	CUST_118845_PI430048170	0	Noncoding	AAGGAGAAGCCCATGAAGAGATGGTGGATTCTCACTGAGTTTTGACTAGCGGAAGAAAAG	lncipedia	chr10	-	29657869	29686640
CUST_100028_PI430048170	0.035458	0.494045	4.19779	3.92819	3.33562	P	A	A	4.80113	5.12154	4.68368	P	P	P	CUST_100028_PI430048170	0	Noncoding	GTATAAACTTCTGAATGAAAGAGGGCCTGCTCATTCAAAGGCAGTATAACTCCAACTGTG	lncipedia	chr8	-	73673138	73746840
CUST_119026_PI430048170	0.0135284	2.27748	7.64889	7.697	7.14476	P	P	P	6.43624	6.3348	6.21053	P	P	P	CUST_119026_PI430048170	0	Noncoding	GATATTTGAAGTTGAGGTGGAAATTGCCAAACAATCCGTGACTATCAAAACCATGTTGGA	NONCODE	chr10	+	102089967	102090062
CUST_25302_PI430048170	0.00040184	0.368067	5.21036	5.5054	5.38648	P	A	P	6.70546	6.86503	6.86692	P	P	P	CUST_25302_PI430048170	0	Noncoding	GATCCTGTAGCCCTTATTATTGACACCTTTCATTTAGAAATTTAGCACATGTCACATTAC	ENSEMBL_GENCODE	chr12	-	68333253	68442216
CUST_90222_PI430048170	0.000186883	2.20712	9.64332	9.565	9.68586	P	P	P	8.39843	8.47704	8.58847	P	P	P	CUST_90222_PI430048170	0	Noncoding	CAGCTCCTGCTCAAGCTATTTTGGCAGTCTGAGAGAACAGTACATTCTGAACCACATTGA	lncipedia	chr8	+	104339825	104348931
CUST_111337_PI430048170	0.000182239	3.02723	11.9338	11.6862	11.9397	P	P	P	10.1751	10.2203	10.3767	P	P	P	CUST_111337_PI430048170	0	Noncoding	ATTCGCTGGTTATCCAGATCAGAAGGGACGGTGGCCTGGCCGGACTTAGAGGAAACTCTG	RefSeq	chr5	+	473235	480891
CUST_111504_PI430048170	0.000551289	3.95491	8.43822	8.39975	8.13366	P	P	P	6.26208	6.39614	6.3775	P	P	P	CUST_111504_PI430048170	0	Noncoding	AGCACTGCAAATTTCACTTTGGACACGTGAGTCAGAGGTTAACACAGAAATCTGCCTCCT	lncipedia	chr5	-	180808840	180815652
CUST_117485_PI430048170	0.0133346	2.24202	5.86476	5.97866	5.30784	P	P	P	4.25954	4.76642	4.66763	P	P	P	CUST_117485_PI430048170	0	Noncoding	TCCAGGAAGTACATTCCTGGAACAAAAATGATCTTTGCCAGCATTAAGAACAATGCAGAA	lncipedia	chrY	+	26549424	26549743
CUST_99129_PI430048170	3.60812e-05	36.5439	9.89041	9.54392	9.9186	P	P	P	4.65038	4.67568	4.47319	P	A	A	CUST_99129_PI430048170	0	Noncoding	TCCTCAAGGCCAAGGCCACATTCAAGACTTTGGACTTCATTGATGCACTTGTGCCGAGCA	RefSeq	chr9	-	38540566	38545372
CUST_118152_PI430048170	0.00530988	3.9387	5.42855	5.14933	5.15333	P	P	P	2.97191	3.67409	3.06527	A	A	A	CUST_118152_PI430048170	0	Noncoding	CCTCACAAAATGAAGTCTGGGGATATGTCAAGATAAATGATTGTTCTTTTCTGTCTTTCT	RefSeq	chr8	-	85441805	85463054
CUST_122046_PI430048170	0.0239798	2.60574	10.6434	10.6853	9.88452	P	P	P	9.18251	9.1334	8.86366	P	P	P	CUST_122046_PI430048170	0	Noncoding	GTTCCCTATGTACCTGTTACTATCAAAAATCTATAAACAGTCAATGTGGATGAGAGCTAA	NONCODE	chr20	-	8929894	8930038
CUST_92257_PI430048170	0.0130144	2.24812	6.84801	6.20097	6.69973	P	P	P	5.09915	5.38135	5.76146	P	P	P	CUST_92257_PI430048170	0	Noncoding	ATGGTGCATATGACAAGCAGCCTTATGAAAAGGCTGTGAAGCTGAAGAAAAACTAAGAAA	lncipedia	chr15	+	58672295	58672933
CUST_125784_PI430048170	0.0144852	2.202	5.01555	4.86176	5.00587	P	P	P	3.4765	4.02866	3.91012	A	A	A	CUST_125784_PI430048170	0	Noncoding	ATACTTGGGGAACTGGAGAAAGTACAGAAGGTGATGTGAAATCAATTGGGTCATCAAAAG	RefSeq	chr9	-	99355339	99375257
CUST_4952_PI430048170	0.0349539	2.20501	5.25822	5.1251	4.81244	P	P	P	4.30241	3.35067	3.99952	A	A	A	CUST_4952_PI430048170	0	Noncoding	TTTGAGCTGGGGCATTTAAAGCTTTCCTTTAATATTTTTACCTGCTCATTATGATTCCTC	RefSeq	chr5	-	178184509	178187432
CUST_91995_PI430048170	0.0155577	2.06761	7.12359	6.74403	6.4786	P	P	P	5.54481	5.84179	5.86746	P	P	P	CUST_91995_PI430048170	0	Noncoding	GAGATATGTGACAACATTTTAGTGGCTTTCTTGAATCAACAACTGCATGAACAAGTAGAT	lncipedia	chr18	+	34493409	34513937
CUST_111943_PI430048170	0.0119405	2.20556	9.30722	9.41574	8.92749	P	P	P	8.17004	8.03184	8.06571	P	P	P	CUST_111943_PI430048170	0	Noncoding	TTCATCAAGGATGGCAAATTGATCAGTGCCTCCACTGACTATAACCTGACAAGAGCATCA	lncipedia	chr8	-	39157537	39158701
CUST_42773_PI430048170	0.00213932	0.357233	5.5686	5.5173	5.48222	P	P	P	6.82178	7.10304	7.08309	P	P	P	CUST_42773_PI430048170	0	Noncoding	CAATGGAATAAATCATTTGTTCCTAAAACATGTTCTGCACATGATTAAAGCAGCTTTGGG	lncipedia	chr8	+	140636143	140638432
CUST_62579_PI430048170	0.0106724	3.34951	6.88762	6.84563	6.66652	P	P	P	4.77139	4.8209	5.4738	P	P	P	CUST_62579_PI430048170	0	Noncoding	GAACGTTCCAGAGACCCATTAGTGCCAAAGGCAAATGAAAACACACCCTGTGAAAATGTC	RefSeq	chr16	-	975760	981318
CUST_5308_PI430048170	0.000737122	2.16676	6.20302	5.91278	5.97597	P	P	P	4.76602	4.97612	5.00765	P	P	P	CUST_5308_PI430048170	0	Noncoding	ATCTGATTCAGTTTTGAAGGGCGGGGTATATATAGATAGTTATGTTGTGTGTGTGGTGGT	RefSeq	chr10	-	47535580	47553523
CUST_116054_PI430048170	0.00526704	2.5235	5.63196	5.77765	6.03045	P	P	P	4.22472	4.81431	4.35477	A	P	A	CUST_116054_PI430048170	0	Noncoding	TCCCTTGACCCAATTAGATTATCGAATCTCCAATAAACGTCATCTGTTATCTCTGGAATC	lncipedia	chr15	-	58241896	58257548
CUST_70325_PI430048170	0.00245784	2.27439	8.25464	8.1543	8.17959	P	P	P	6.83261	7.09	7.09603	P	P	P	CUST_70325_PI430048170	0	Noncoding	GATTTTACTCAAACCTCGTGAGCAAGCCAACGAAGAGAGGAACAACTAAGCTACTTTAAA	lncipedia	chr2	+	186665125	186668020
CUST_91189_PI430048170	0.00562298	0.20697	4.04858	3.26321	3.18034	P	A	A	5.55657	5.89169	5.99337	P	P	P	CUST_91189_PI430048170	0	Noncoding	TTTCATGATGTCATGTTGCATGTGCTCTTGAGCTGTAAATAAAGAGACGATGGTTAAAAA	lncipedia	chr1	+	11722129	11725857
CUST_71811_PI430048170	0.00114047	0.479599	4.7336	4.75875	4.97012	P	P	P	5.99138	5.69228	5.95303	P	P	P	CUST_71811_PI430048170	0	Noncoding	ACACACATGTTTATCTCCATCCATTTCCTCCAAAAATCTTGTTAAAATGACCCTACAGGA	lncipedia	chr21	-	37069266	37072723
CUST_126144_PI430048170	0.00202386	0.473923	8.65541	8.51468	8.47188	P	P	P	9.61855	9.61507	9.64643	P	P	P	CUST_126144_PI430048170	0	Noncoding	AAACAGTGGGCTGTACTCCAGTGCTGGGACATTGAATGACTGTATGCTGCTTTTGATTTC	RefSeq	chrX	-	134543376	134546630
CUST_119079_PI430048170	3.26275e-06	0.413869	12.836	12.8109	12.7852	P	P	P	14.0617	14.0629	14.1252	P	P	P	CUST_119079_PI430048170	0	Noncoding	CTTGTGTGTCCCTGTGACTTCTAGGGACAGGAAGATGGTTGGCGACGTGACCGGGGCCCA	NONCODE	chr11	+	314417	314962
CUST_78457_PI430048170	0.000639666	2.55974	9.01345	8.76371	8.83455	P	P	P	7.48031	7.58819	7.48421	P	P	P	CUST_78457_PI430048170	0	Noncoding	CTGGCTGGAGGTAGCCTCTCTTGTGTCATTTTCTTTTGAAAAATAACAATAAACTGTTTA	lncipedia	chr7	-	47809409	47809762
CUST_114524_PI430048170	0.0018503	0.43712	8.11921	8.43038	8.11672	P	P	P	9.41631	9.52111	9.3271	P	P	P	CUST_114524_PI430048170	0	Noncoding	CTTGCCCTTCAACCCCTGAAAAAACAAAGAAAAAAGCAAGTATTGAAGCAGAATAACTAC	lncipedia	chr5	-	131878904	131921938
CUST_122555_PI430048170	2.20173e-05	2.45848	8.29215	8.25203	8.17549	P	P	P	6.88114	7.0198	6.92433	P	P	P	CUST_122555_PI430048170	0	Noncoding	GGGCGTATCATTGTCACATGATTCCATGTTTGTTGATGAAAATAAACAGTGGTTTTCAAA	NONCODE	chr3	+	12408874	12410425
CUST_69451_PI430048170	0.00940626	2.23266	10.9418	11.0063	10.4967	P	P	P	9.71055	9.76729	9.53171	P	P	P	CUST_69451_PI430048170	0	Noncoding	ATCTTAATGCCCAACATTGGTTATGGGAGCAACAAAAACACAAAGCACCTGGGGCCTAGT	lncipedia	chr2	-	10874290	10874567
CUST_27124_PI430048170	0.0215031	3.12638	5.15375	5.22321	5.40328	P	P	P	4.0239	3.62907	3.04114	A	A	A	CUST_27124_PI430048170	0	Noncoding	TGAGGTTGGGGAAGAAGAGGATCATTTTATATCGAAACCAATACCAATATAGAGTCGATA	ENSEMBL_GENCODE	chr14	-	74471930	74472360
CUST_124375_PI430048170	0.000873692	2.15397	8.7833	8.76592	9.04544	P	P	P	7.68302	7.70063	7.89739	P	P	P	CUST_124375_PI430048170	0	Noncoding	ATTTTCTCCTGCATTGTGACTCACGAAATTGACCGCTACACAGCAATTGCCTATTGGGGT	lncipedia	chr6	-	32948612	32949671
CUST_25446_PI430048170	0.00227079	0.428292	8.0194	7.6159	7.82363	P	P	P	9.0447	8.93973	9.16391	P	P	P	CUST_25446_PI430048170	0	Noncoding	TGAGAAAAAATTAACATTTGATCCTGTTGGTGCCACCTGAAGGCAGAGATGGCTGAGGAC	ENSEMBL_GENCODE	chr12	+	90293318	90300340
CUST_116981_PI430048170	0.000504509	0.416743	6.50979	6.3815	6.28368	P	P	P	7.67177	7.70297	7.59537	P	P	P	CUST_116981_PI430048170	0	Noncoding	TAGAAAACAATGAAGGCAAGATGGAAAGGTCCTGCCATCATAAGACCAGTTGGAAAGGAG	lncipedia	chr1	+	78666271	78666695
CUST_118620_PI430048170	0.00756451	2.01215	7.19976	7.33726	6.94553	P	P	P	6.38158	6.19685	5.85675	P	P	P	CUST_118620_PI430048170	0	Noncoding	ATGAGCAGGGAGATTGGGTCTACATGCCGAAGAAATTTGACCCTATGGGACAACAAACTT	NONCODE	chr1	-	182433892	182434461
CUST_93372_PI430048170	0.00466181	0.465313	5.58821	5.23873	5.69049	P	P	P	6.81769	6.65878	6.35182	P	P	P	CUST_93372_PI430048170	0	Noncoding	AGTATGAAATAACCATAGTAAGGAAAAGGATGGTCATCACTCTTCTCACCTGGTGGAACT	lncipedia	chr11	+	27584284	27658590
CUST_31412_PI430048170	0.0309076	5.22918	5.98165	5.50615	5.80634	P	P	P	4.01675	2.27044	3.38759	A	A	A	CUST_31412_PI430048170	0	Noncoding	AAATGAAACAATTGCTCAACTGATCTCCTGGGATCTCTACTAAGATGTTGGCAGCCCGGT	RefSeq	chr18	+	14337422	14342524
CUST_71126_PI430048170	0.0181719	2.37754	8.65359	8.61051	8.33235	P	P	P	6.7957	7.48533	7.48429	P	P	P	CUST_71126_PI430048170	0	Noncoding	GCTGCTTGATACTGACATTTTGTAGATGTAGTATGGCTATGCCGGTACGTTTCTGCCTAT	lncipedia	chr20	+	34688687	34688978
CUST_70514_PI430048170	0.0149625	2.53481	6.31688	6.09863	5.90029	P	P	P	5.19322	4.39035	4.61413	P	A	A	CUST_70514_PI430048170	0	Noncoding	ATTTACAGAGAAAGAAGTTGTGAAACCACCATAACATTGATCGCCCTAAAGGACTGGCAT	lncipedia	chr2	-	215379204	215383483
CUST_73564_PI430048170	0.00088037	2.0433	10.1852	10.0549	10.1309	P	P	P	9.08535	9.10972	9.08602	P	P	P	CUST_73564_PI430048170	0	Noncoding	GCATTCCTGCTGTTAGTAGAATGAAGATATACCAAATGTAGCAGTTTATCCTCATAATGG	lncipedia	chr3	+	141921533	141925985
CUST_39251_PI430048170	2.32106e-05	4.31583	12.1547	12.2306	12.1106	P	P	P	9.94526	10.1167	10.1014	P	P	P	CUST_39251_PI430048170	0	Noncoding	GGCTGCAAGTCTTGGAGGCATTCTCTAGGAATCACAGTCCCATTCTTCTGCAGGCAAACG	ENSEMBL_GENCODE	chr15	+	37984766	38040987
CUST_17943_PI430048170	0.00193626	2.1988	6.09129	6.14423	6.37282	P	P	P	5.23675	4.84218	5.10746	P	P	P	CUST_17943_PI430048170	0	Noncoding	AGTAAAAGAAGGCACTGAGGTTTAAGTGCTACGTGGGAGCAGTTGCCGATTTTTGCAATG	RefSeq	chr5	+	142325292	142464054
CUST_92830_PI430048170	0.00803472	0.494974	8.44852	8.55636	8.21478	P	P	P	9.40443	9.41585	9.46323	P	P	P	CUST_92830_PI430048170	0	Noncoding	CTATGCCAATCACTTGAGTTAAACTCTGAAACCAAGAGATGATCTTGAGAACTAACATAT	lncipedia	chr2	-	112835180	112836779
CUST_66684_PI430048170	0.0269674	3.12043	9.35048	9.31113	8.49837	P	P	P	7.44447	7.39914	7.53667	P	P	P	CUST_66684_PI430048170	0	Noncoding	CAGCTTTGAGGAAATCTGAAATAGAGTGCTATACAATGTTGGCCAAAACTGCTGTCCATC	lncipedia	chr2	+	152131554	152131845
CUST_102558_PI430048170	0.0186554	2.31838	10.6172	10.6199	10.0997	P	P	P	9.2889	9.20448	9.26222	P	P	P	CUST_102558_PI430048170	0	Noncoding	CAAAGCACCTAAAAATGCACGGCCAGATTTAAAGAGCTCATGGTTGGATTAACCCATACA	lncipedia	chr12	-	118737963	118738511
CUST_39110_PI430048170	0.00163617	2.3011	8.04497	7.85445	8.25389	P	P	P	6.71505	7.00214	6.84244	P	P	P	CUST_39110_PI430048170	0	Noncoding	CATCAAACCCTGTTGGAATAAAAAAGGACATTTCTAGGAGATCAGTCTTCGAGATTGGCC	RefSeq	chr2	-	112641829	112644180
CUST_11330_PI430048170	3.74032e-05	2.45521	9.69277	9.59676	9.60528	P	P	P	8.25364	8.35198	8.3998	P	P	P	CUST_11330_PI430048170	0	Noncoding	AAGCAGAATGTAATGGGGAGTCCCCTCACAAGAAGAATTTGGATCAAAGCATGGCAGTGA	RefSeq	chr1	-	111599006	111608318
CUST_62136_PI430048170	0.0181109	2.0555	10.7661	10.9729	10.3857	P	P	P	9.6426	9.80619	9.60982	P	P	P	CUST_62136_PI430048170	0	Noncoding	CTTCCTAAAACACCAAGAGAACCTAGTTCTGTAGAAGACATTAAAGCAAAACAGCAAGGA	lncipedia	chr15	-	73161778	73162928
CUST_92841_PI430048170	0.00307818	2.60304	6.68777	6.88981	6.44065	P	P	P	5.19936	5.40857	5.29694	P	P	P	CUST_92841_PI430048170	0	Noncoding	TGTCTTCAGAAAAGGTTGGTGATGACATTGCTAAAGCAACTGGTGACTGAAAGGATCTGA	lncipedia	chr7	+	22881892	22882390
CUST_62885_PI430048170	0.00773466	2.9897	6.29051	6.5282	6.39528	P	P	P	4.42417	4.97234	5.01555	A	P	P	CUST_62885_PI430048170	0	Noncoding	TACAAGTAAAACTGACCAGAGCCCCAGGAATAAATGGTTTTCTTGGCTTCCTCCTTGCTC	RefSeq	chr17	+	39029905	39053205
CUST_51243_PI430048170	0.00177142	6.0333	6.59081	6.62477	6.41245	P	P	P	3.60213	3.99413	4.1995	A	A	A	CUST_51243_PI430048170	0	Noncoding	CTTTTGAATCATAAGCACTTTTGTTAAATACCTCAAATCTTTCGAGAACAGCAAGGAGCA	RefSeq	chr14	-	55781134	55796674
CUST_120414_PI430048170	1.98587e-05	4.27377	11.5936	11.6252	11.7716	P	P	P	9.49939	9.58377	9.62426	P	P	P	CUST_120414_PI430048170	0	Noncoding	GGCTGCAAGTCTTGGAAGCATTCTCTAGGAATCACAGTCCCATTCTTCTGCAGGCAAACG	NONCODE	chr15	+	37984766	38040987
CUST_74939_PI430048170	0.023048	2.19664	7.96988	8.00585	7.39615	P	P	P	6.70812	6.75952	6.56881	P	P	P	CUST_74939_PI430048170	0	Noncoding	TATTACTAAAGACTGTCACTGAGGTAAATGTGAGTGAAGTGGGCCTTGTGACACAGGGAG	lncipedia	chr4	-	152796062	152796831
CUST_66178_PI430048170	0.00150932	2.95958	6.64549	6.41074	6.87694	P	P	P	5.13324	4.795	5.30122	P	P	P	CUST_66178_PI430048170	0	Noncoding	GGTAATTTAGAACTCCTTCATATGCTTGAATCTCCAGAGCCTCTCTATACTAAGGTTGAC	lncipedia	chr22	+	16423942	16426031
CUST_81104_PI430048170	0.0124625	4.07342	4.75641	5.03742	5.12548	P	P	P	2.59146	2.57715	3.49475	A	A	A	CUST_81104_PI430048170	0	Noncoding	TGCGTTACACGGAAGACACTTACCCCTCAATAAATATTTCTGAAATGGATGGATCTTTAT	lncipedia	chr9	+	98848771	98849634
CUST_107425_PI430048170	0.00541915	0.252852	5.92747	5.67056	5.28158	P	P	P	7.72135	7.64134	7.53359	P	P	P	CUST_107425_PI430048170	0	Noncoding	AACCTAATGAGCAGACTAAGAAAGCATCTATACAGAAGAACAGACATACAAATACCAAGG	lncipedia	chr18	+	58653442	58668184
CUST_42545_PI430048170	0.0239375	2.07324	5.72555	5.56913	4.99396	P	P	P	4.45709	4.59859	4.13746	A	A	A	CUST_42545_PI430048170	0	Noncoding	TTTTATACCCGGTGAACCAGCCAACTTTCATGCAGTTGAGAAAAGGTAAACTGTCCAGAT	lncipedia	chr10	+	26590063	26593227
CUST_112225_PI430048170	0.000232399	2.01265	9.6153	9.51851	9.58071	P	P	P	8.49078	8.53982	8.65343	P	P	P	CUST_112225_PI430048170	0	Noncoding	CAGTTTGCAGGAAGAAAGGAAGAGAATGGAAATTGCTTCTGGAAAATACTAGTTTTACAA	ENSEMBL_GENCODE	chrX	-	45745211	45770274
CUST_106883_PI430048170	0.0114849	2.68139	6.41699	6.73795	6.67075	P	P	P	5.4895	5.24551	4.74457	P	P	A	CUST_106883_PI430048170	0	Noncoding	CAGCTTACTAAGAAAAGTAAGGAAGAGGTTGTAGAATATGCTAAGCTTTTGGCCAAGTAA	lncipedia	chr6	+	77496118	77496671
CUST_92431_PI430048170	0.016303	0.486496	5.06205	5.01292	4.54084	P	P	P	5.81882	5.98386	5.98065	P	P	P	CUST_92431_PI430048170	0	Noncoding	ATCCATGACAGATAATTGACCTTCTGATAAACATTCCTTGTAAGGATGCTGGTGTTACCC	ENSEMBL_GENCODE	chr17	+	80149627	80149798
CUST_31461_PI430048170	0.00202154	2.87076	6.86815	6.98731	6.8009	P	P	P	5.47407	5.11327	5.48116	P	P	P	CUST_31461_PI430048170	0	Noncoding	GCAGCGTGATGTCTCTGCTTTTATGTCTCTGTATTGTTGCAATAAATTCTTACTCTTTAT	ENSEMBL_GENCODE	chr18	+	24402153	24402714
CUST_99121_PI430048170	0.0335443	2.03882	11.329	11.3505	10.7671	P	P	P	10.1226	10.1764	10.1361	P	P	P	CUST_99121_PI430048170	0	Noncoding	ACTGATTATTCCCATCAGTATTGAGCCACGAGTTGAAGCCAAAGTCACCATTGCTGATGC	lncipedia	chr8	-	100776511	100776865
CUST_100592_PI430048170	4.06551e-05	5.70267	9.38117	9.17302	9.35497	P	P	P	6.87121	6.6131	6.88292	P	P	P	CUST_100592_PI430048170	0	Noncoding	CAAATCACTCTGTAGGGGATTTTCCATTTAACATATTGTGATTGTGCAGTAACATTAGTC	ENSEMBL_GENCODE	chr9	+	90997054	91001871
CUST_76246_PI430048170	0.000408407	0.390139	7.31766	7.23546	7.53322	P	P	P	8.70146	8.84344	8.62318	P	P	P	CUST_76246_PI430048170	0	Noncoding	TCCGTGTAAGTGTATGGATATCCAGTGGGTAGTGGGTGTTAAGATTGCAAGTGATTTTTT	lncipedia	chr5	+	160468245	160487693
CUST_69114_PI430048170	0.00211892	0.461579	9.43972	9.11332	9.39985	P	P	P	10.4987	10.2044	10.5899	P	P	P	CUST_69114_PI430048170	0	Noncoding	AACCCTTCCTGATTTTAGCCTGGCAATGTAAGTGTCCTTAATGTGACTGTTTTGATAATT	lncipedia	chr12	+	121187541	121188032
CUST_62992_PI430048170	6.87036e-05	0.476336	6.85824	6.77096	6.70049	P	P	P	7.79187	7.82542	7.92333	P	P	P	CUST_62992_PI430048170	0	Noncoding	CTTCCAGCAAATACCTGTTCATACTGTCCTATCAGTGACAGTGAGACCCGTCTCAAAAAA	lncipedia	chr17	+	43171224	43176676
CUST_100607_PI430048170	0.0263273	2.03746	5.972	6.31648	5.73542	P	P	P	5.33628	4.53224	5.02389	P	P	P	CUST_100607_PI430048170	0	Noncoding	TTTGCTGTTCATGATATGAGATAGACAGCTGCTGAAGTGTCATTAGAGCAGTGGCTGCTG	lncipedia	chr6	+	132271981	132273332
CUST_25572_PI430048170	0.00324211	0.388217	7.30638	7.42042	7.10258	P	P	P	8.61402	8.68496	8.64248	P	P	P	CUST_25572_PI430048170	0	Noncoding	TTGGTTTTCAGATTTGCTTAGGCTCCATTCATAAATACAGATGGCACACTTCTAGGATGG	RefSeq	chr12	-	109052040	109053965
CUST_120786_PI430048170	8.01756e-05	0.457289	7.26131	7.25652	7.10891	P	P	P	8.24703	8.38509	8.38196	P	P	P	CUST_120786_PI430048170	0	Noncoding	CCTTGTGCAGCTGTTGGAGATGAAGTCGACTGATCGCAAGCAGACGCTGCTGCACTACCT	NONCODE	chr17	+	45244930	45245028
CUST_117513_PI430048170	0.009958	0.481337	5.16277	4.56293	4.88346	P	A	P	6.06841	5.70934	6.03165	P	P	P	CUST_117513_PI430048170	0	Noncoding	ACTGCAGAAGGACCACAGTAGAGAATCCCTCACCAATAAGGAACTGTGTTAATCAGGAGT	RefSeq	chr21	-	44934725	44939913
CUST_21228_PI430048170	0.00138611	2.41016	5.50824	5.82589	5.6979	P	P	P	4.4771	4.17217	4.56427	P	A	A	CUST_21228_PI430048170	0	Noncoding	CAAGGAAGTCAACATACTAGACCACATTGCCTGTCTTCAAGAAAGTTATGTTTTGGTTAG	ENSEMBL_GENCODE	chr8	+	100337595	100350707
CUST_98850_PI430048170	0.027148	2.28953	7.86414	7.85422	7.24087	P	P	P	6.4567	6.44667	6.55209	P	P	P	CUST_98850_PI430048170	0	Noncoding	GAAGATGTTGACGCATGAGGTGAAACAGAATTCTCTTTGGGCAAGAGATGTGCTTATGTA	lncipedia	chr5	-	72878867	72879185
CUST_106991_PI430048170	0.00142938	2.33213	8.66008	8.5979	8.42849	P	P	P	7.19656	7.54888	7.26106	P	P	P	CUST_106991_PI430048170	0	Noncoding	GGCGTATCATTGTCACATGATCCCATGTTTGTTGATGAAAATAAACAGTGGTTTTCAAAA	lncipedia	chr3	+	12408873	12410425
CUST_125504_PI430048170	0.030504	2.14432	8.06178	8.24918	7.53626	P	P	P	6.78561	6.98048	6.86374	P	P	P	CUST_125504_PI430048170	0	Noncoding	GGTAATGAAATCAGGTACAACTCCAAAAGGAGACACTGGAGAAGAAGCTAGCTGGATCTA	NONCODE	chr8	-	97788209	97788357
CUST_16360_PI430048170	0.0438041	0.449573	4.19581	4.13458	3.60143	A	A	A	4.87941	4.70928	5.67911	P	P	P	CUST_16360_PI430048170	0	Noncoding	TGGCCTATCTAGTTTACTGTAGTTTTTATGGGCTTAAGAAGAAGACCACCTTGTCTAATC	ENSEMBL_GENCODE	chr4	-	107936031	107941255
CUST_11328_PI430048170	0.00392325	2.62883	10.2106	10.0448	10.0857	P	P	P	8.44916	8.85252	8.82718	P	P	P	CUST_11328_PI430048170	0	Noncoding	GCCGATTTCAAATGAAGACTGACTTGATCCTGAACATAACCTACAAGAAGAAAGGGACCA	RefSeq	chr1	-	111599006	111608318
CUST_76900_PI430048170	0.00314438	2.00633	8.304	8.15549	8.14291	P	P	P	7.28452	6.98824	7.30067	P	P	P	CUST_76900_PI430048170	0	Noncoding	CTCCGCATCTTCCAAACTTGGAAAGCATATTTTAACAGCACAAATATATCTACATGTTTG	lncipedia	chr6	-	16432563	16750092
CUST_113874_PI430048170	0.0357396	2.35181	8.26031	8.47169	7.68651	P	P	P	6.97012	6.91356	6.94236	P	P	P	CUST_113874_PI430048170	0	Noncoding	AGTTCAATGTGGATGAATGAGAAGACATAGTGGCTGAGAAGCAGCTCATCCCAGATAGCT	lncipedia	chr8	+	33540184	33540493
CUST_111400_PI430048170	0.00199669	2.00788	7.91382	7.9884	7.65741	P	P	P	6.90335	6.93365	6.71667	P	P	P	CUST_111400_PI430048170	0	Noncoding	ATGCAGGAAGTTTGTGGATGACCTGATGATCCTCAGCAGGAACTCTGTTTACCTCATTGA	lncipedia	chr5	-	73152415	73152938
CUST_116188_PI430048170	0.00457824	0.407646	3.68213	3.79301	3.24723	A	A	A	5.07383	4.57827	4.96421	P	P	P	CUST_116188_PI430048170	0	Noncoding	CTGAACTCTTAACCAGTGACATCTGCTGTAACTGTTTTCTTTGAGATTAATAAATGGACC	lncipedia	chr14	+	54902305	54903800
CUST_59291_PI430048170	0.0114116	2.42868	8.51021	8.52926	7.97786	P	P	P	7.20489	7.06286	6.9637	P	P	P	CUST_59291_PI430048170	0	Noncoding	GCTCACTTTGCCAAGCTGGAAAAGGCAAAGGTGAATGAACTTGCCATTAAACTGGGTTAA	lncipedia	chr12	+	76599670	76600470
CUST_62341_PI430048170	0.0364213	2.1314	5.7066	5.61651	5.05086	P	P	P	3.92887	4.87434	4.21032	A	P	A	CUST_62341_PI430048170	0	Noncoding	GGGAGGTGCCATTTTCGTAATGAAAAATTAACGACATATCCATCAAATTAGAGACTCAGA	lncipedia	chr15	+	85099756	85113956
CUST_46244_PI430048170	0.00413062	2.09458	7.71787	7.70448	7.57758	P	P	P	6.38018	6.70515	6.69564	P	P	P	CUST_46244_PI430048170	0	Noncoding	TACTCAAGTCTGTGCTGCCAAGGAAGAACAGAATCTTTAGGTCTTCTGTGCAAAGTTGTG	lncipedia	chr8	+	131053598	131129898
CUST_67165_PI430048170	0.00432451	14.2606	6.61636	6.79577	6.61956	P	P	P	3.37015	2.46754	2.50976	A	A	A	CUST_67165_PI430048170	0	Noncoding	CATCAGAGGAGAGATATTGTACCCACTCTTCAGAGACAGAAACTGAAATTCAAAGAGAGT	lncipedia	chr12	+	10170629	10172418
CUST_98284_PI430048170	0.0226367	2.2692	13.3956	13.379	12.8315	P	P	P	12.0441	12.0881	11.9939	P	P	P	CUST_98284_PI430048170	0	Noncoding	GTAACAACTATGCCAAAAGACATCCAGCTAACACACTGCCTACGTAGAGAACGTGCTTAA	lncipedia	chr17	+	28416921	28417492
CUST_120531_PI430048170	0.00963815	3.07256	4.83784	4.8372	4.8294	P	P	P	3.46105	2.90233	3.22889	A	A	A	CUST_120531_PI430048170	0	Noncoding	AAGTTTCTGTTGTCTGTAGTTATTTGATATTGGCTGTGGACCCACAAAGTCACACAAGGC	RefSeq	chr15	+	72782834	72798199
CUST_76890_PI430048170	0.00390189	0.455734	5.22946	5.2767	4.84059	P	P	P	6.10216	6.25132	6.41582	P	P	P	CUST_76890_PI430048170	0	Noncoding	GAAAGTGCTGCTACCACAAACATGAGGAAACTTCTGTTAGGAGTTCAACCTTCAGAGAGG	lncipedia	chr6	+	14661329	14665134
CUST_8239_PI430048170	0.0118666	0.361868	3.27069	3.49817	2.70877	A	A	A	4.75441	4.43099	4.77611	P	P	P	CUST_8239_PI430048170	0	Noncoding	AGACGAAGCTTTTGAAGGTTTAAGGATCACCTATTTATTGACAAAATTGTTTCCGTGGCT	RefSeq	chr6	+	53628379	53631394
CUST_89863_PI430048170	0.00637342	3.02775	7.02042	6.80489	7.08554	P	P	P	5.28098	5.05397	5.71601	P	P	P	CUST_89863_PI430048170	0	Noncoding	AGATGACGTGTCAAAGATTGACATCAACCTTGAGTGCTTATTTGTGGACTTGAGATACAG	lncipedia	chr5	+	142744936	142761277
CUST_58406_PI430048170	0.00527593	5.48506	5.75529	6.06578	5.93466	P	P	P	3.73315	2.92745	3.62127	A	A	A	CUST_58406_PI430048170	0	Noncoding	AGCTCTTAAGATCTCTACAGTCTGTTTACCCAATGTATTGAATTCTTGTACCCAATATCT	lncipedia	chr11	-	128536411	128587542
CUST_27962_PI430048170	0.000251957	31.3817	9.3115	9.26655	9.423	P	P	P	4.38177	4.57391	4.0945	A	P	A	CUST_27962_PI430048170	0	Noncoding	GGTTTTTCCACTAATTTTTCCTATTAAACAGACTGCTGAAATAAAAACCTTTGGAGACCC	ENSEMBL_GENCODE	chr15	-	57990217	57990636
CUST_18773_PI430048170	0.000605856	0.4879	5.87767	5.88646	5.96665	P	P	P	6.89417	6.87893	7.05842	P	P	P	CUST_18773_PI430048170	0	Noncoding	TTGGATTTTAGCATTACTGATCTATAGCCTTGCAGGGGCTTAAGGATGGCAGCTGTCTCT	RefSeq	chr6	-	71407864	71420745
CUST_116958_PI430048170	0.00263237	2.01405	8.43734	8.15928	8.06829	P	P	P	7.01548	7.27871	7.3458	P	P	P	CUST_116958_PI430048170	0	Noncoding	AAAGACAACTGGTTTGCTCACAGTTCTGATACCGGCCTTGAACTGAACTTTCCATCTCTG	lncipedia	chr1	+	89633071	89764518
CUST_108900_PI430048170	0.00766827	7.79566	5.51747	6.29798	6.94625	P	P	P	3.73363	2.93341	3.43913	A	A	A	CUST_108900_PI430048170	0	Noncoding	AGAAGAGTTCTTTATGACAGCGACAATGGGGACAGAGGAACGGTGACTGGAAGATTCTTT	lncipedia	chr16	-	89372853	89490320
CUST_68687_PI430048170	0.000392062	0.238825	6.7759	7.0634	6.73589	P	P	P	8.85549	8.90177	9.03255	P	P	P	CUST_68687_PI430048170	0	Noncoding	CAGAGTGGTGATGTATGAAGGGAAGAAAATCATGGCTGACTCAGGACCCATCTATGATAA	lncipedia	chr15	+	39594067	39595551
CUST_62857_PI430048170	0.0293075	2.25404	5.78799	5.30583	5.03555	P	P	P	4.16289	4.20264	4.34253	A	A	A	CUST_62857_PI430048170	0	Noncoding	ACCAGTGTGTTAACCAGTTTGCTGTGTTTGTCTTTTAGGACAGAACTGTACCGCTCTCTT	lncipedia	chr17	+	37054826	37056870
CUST_33930_PI430048170	0.00538615	0.446804	6.14134	6.1625	5.87082	P	P	P	7.19555	7.24036	7.24303	P	P	P	CUST_33930_PI430048170	0	Noncoding	TAGGGAAACAGAGAGGAAGAAGAATGATTTTTCTTTTGATGACTCTATATCCAACTCTGA	RefSeq	chr21	+	36005319	36008295
CUST_66553_PI430048170	0.0154301	6.14661	5.81727	5.74576	5.62887	P	P	P	3.51951	2.33268	3.24014	A	A	A	CUST_66553_PI430048170	0	Noncoding	ATTGGAAGGAAACCCAGGTGAGAAGCTGAGTCAATGGCTTTGAGAATGTCACTGCATATG	lncipedia	chr2	+	130693758	130702601
CUST_117019_PI430048170	0.000289465	6.04286	7.9076	7.81361	7.64235	P	P	P	5.18239	5.15928	5.24717	P	P	P	CUST_117019_PI430048170	0	Noncoding	AATGTGAAGGGATTGTCCCAATCCCACTTAAAGGAAAATTATATTACACAAAGAAGAGGA	lncipedia	chr1	+	50846467	50846837
CUST_69100_PI430048170	0.00474326	2.27179	5.95086	5.96682	5.93596	P	P	P	4.90946	4.76391	4.61382	P	P	A	CUST_69100_PI430048170	0	Noncoding	TAAGAAGGATGGAGATGGATTCCTGTATGTGCTATATGCCTCTCAGGAGATACTTGGAAT	lncipedia	chr12	+	89027756	89028522
CUST_72013_PI430048170	0.00130361	2.02524	6.31259	6.41286	6.12292	P	P	P	5.23455	5.43684	5.11951	P	P	P	CUST_72013_PI430048170	0	Noncoding	ATAGTGGCGAGCTGGAGCTAGAGAGCTGATGGATAAATTTGGTCCCAACAAGATGACATA	lncipedia	chr22	+	17418696	17419828
CUST_75537_PI430048170	0.00761327	2.03374	8.57188	8.15711	8.07387	P	P	P	7.03999	7.28198	7.43238	P	P	P	CUST_75537_PI430048170	0	Noncoding	TTGTTTTTGGAGTGTGTGACTGCTACTTATATGATGACCTTGCCTTGAACGTCTCTCACC	lncipedia	chr5	+	67142163	67143020
CUST_113795_PI430048170	0.0291899	2.15304	9.82481	9.89503	9.28646	P	P	P	8.62283	8.564	8.57294	P	P	P	CUST_113795_PI430048170	0	Noncoding	CAGAATTATCTGCTTCCACGTCATCAGTTTGGTTTCATTATACTGACAACTTCGGCTGGC	lncipedia	chr8	+	94688227	94688610
CUST_11590_PI430048170	0.00165105	2.29139	10.4777	10.5019	10.8001	P	P	P	9.31563	9.37448	9.5163	P	P	P	CUST_11590_PI430048170	0	Noncoding	TTTGCCTAAAGCAGAAGTCTACAGGAGACCCACAGAATAAATATGTAAGGTTATTTTGAA	ENSEMBL_GENCODE	chr1	-	154402328	154406564
CUST_33667_PI430048170	0.00628548	2.91368	6.5956	6.28784	6.73224	P	P	P	4.79244	4.72674	5.4028	P	A	P	CUST_33667_PI430048170	0	Noncoding	GCTCACCTGAGACATTTAGGGTTTGGAGACAGATGGTTTTAAAAGTCTATTTTATTTGAA	ENSEMBL_GENCODE	chr21	-	7788703	7793954
CUST_108297_PI430048170	0.00513455	2.56196	7.60348	7.9571	7.57683	P	P	P	6.30422	6.42554	6.36538	P	P	P	CUST_108297_PI430048170	0	Noncoding	AACTCCACCTTCAACCAGGTTGTGCTGAAGACATTGTTAATGAGTCACAGAAACTGGCCA	lncipedia	chr12	-	4110027	4118132
CUST_116739_PI430048170	0.0101936	0.427913	3.88351	3.81204	3.53172	A	A	A	4.60719	5.26455	4.97856	P	P	P	CUST_116739_PI430048170	0	Noncoding	ATTGGGCCTCTACTTCTCGAGGGATGCTTACTGGGAGAAGCTGTATGTGGACCAGGCAGC	lncipedia	chr10	+	43077259	43100655
CUST_82919_PI430048170	0.000239217	0.379758	4.84994	4.75188	4.98662	P	P	P	6.36458	6.31327	6.09707	P	P	P	CUST_82919_PI430048170	0	Noncoding	CTTTTTACCGTTAAGGAGATCTGAGTTAATGGCTTGCTCAAGTTCCCAGGAATCGGTTGT	lncipedia	chr16	+	56608594	56609497
CUST_111547_PI430048170	0.00333878	2.12034	6.60364	6.73312	6.72468	P	P	P	5.78857	5.45157	5.55094	P	P	P	CUST_111547_PI430048170	0	Noncoding	GGGACTGCATGTATCCCACAGGATGTTAAAAAATTGAGAAAATGTTATTTCATGATCTTC	RefSeq	chr6	-	13469269	13472063
CUST_27318_PI430048170	0.0010725	0.376322	4.91019	5.12812	4.78782	P	P	A	6.37077	6.43865	6.26189	P	P	P	CUST_27318_PI430048170	0	Noncoding	GAGACAGTGTCCCCTAAATACATCTGACAGCACTTTTGAATGGAAAAGAGAAAAAGAAAA	ENSEMBL_GENCODE	chr14	+	96210860	96214818
CUST_17337_PI430048170	0.00340051	4.1216	7.56369	7.12469	7.27348	P	P	P	4.88486	5.20928	5.66557	P	P	P	CUST_17337_PI430048170	0	Noncoding	GCATGCCGGATGCCTTTTATTGCTTCCATCTGTTTAAAGATAATGAAAATAAGAAATTGG	ENSEMBL_GENCODE	chr5	+	66662331	66662988
CUST_71774_PI430048170	0.0126983	3.74664	6.36066	5.66281	5.75709	P	P	P	4.37744	3.30482	4.26481	A	A	A	CUST_71774_PI430048170	0	Noncoding	CATCCCAAAGCACTGAGCTTTTGTCTATAAATTACAAATTTTATCAGGAATTCCAGCAAC	lncipedia	chr21	+	34166247	34167118
CUST_118756_PI430048170	1.42787e-05	0.422866	7.00597	7.12374	7.06952	P	P	P	8.25883	8.37577	8.28966	P	P	P	CUST_118756_PI430048170	0	Noncoding	GTACTATAAAATGATGCCTGCAACTTTGTGGTGAATATTATCCCCAAGTTAACAGTGAAA	lncipedia	chr1	+	239911662	239915444
CUST_75151_PI430048170	0.0014191	2.02371	5.75625	5.80249	5.6707	P	P	P	4.712	4.86174	4.59537	P	P	A	CUST_75151_PI430048170	0	Noncoding	GAGGCGGAAGGGCATCAGGCGGCAGAAGGTGCCGGGAGAGTAGGGAATCTGCGTGCGGGC	lncipedia	chr5	+	474240	475025
CUST_58326_PI430048170	0.0041181	2.45299	7.46435	7.57356	7.05452	P	P	P	6.31893	6.09622	5.79684	P	P	P	CUST_58326_PI430048170	0	Noncoding	TCAAGAAAAGGGTATTCCAGACTGCCTCTGTGTTGCCAAGAGAATGTTTGAATTCCAGGC	lncipedia	chr11	-	121426644	121427416
CUST_73547_PI430048170	0.0239474	2.50136	9.11723	9.24405	8.56426	P	P	P	7.70919	7.63676	7.69681	P	P	P	CUST_73547_PI430048170	0	Noncoding	CTGACCTGAAGGAAAAAGATTGATCACCATTCTAGTAAGAAGCTGGAAGATGGCCCTAAA	lncipedia	chr3	+	138825810	138826358
CUST_123041_PI430048170	0.00733301	2.80479	5.62453	5.34612	5.62686	P	P	P	4.34453	4.06349	3.66381	A	A	A	CUST_123041_PI430048170	0	Noncoding	ATCATCCACATACCCAAGGAAGCTCTTACCAGAGTCATCCTCCAGATGGCCTGTGGTCTG	NONCODE	chr4	-	49561284	49561470
CUST_58478_PI430048170	0.00210541	3.59752	5.28318	5.20217	5.09637	P	P	P	3.22794	3.6084	3.17006	A	A	A	CUST_58478_PI430048170	0	Noncoding	TGTTTCCACAACATCGTGAATGAGTTTAGTGCCACAGCATTAAATGTATTCATGGTGTAC	lncipedia	chr12	+	1506169	1507318
CUST_52393_PI430048170	0.0398677	2.07551	5.27956	5.27064	4.65456	P	P	P	4.41626	4.08892	3.46992	A	A	A	CUST_52393_PI430048170	0	Noncoding	TAAGAAGAAGGCAGAAAGGGCAGACTTGATAGCTTATCTCAGAAAAGCTAATAATCAGTA	lncipedia	chr1	-	202369525	202370145
CUST_89487_PI430048170	0.0170103	2.40967	12.3709	12.4837	11.9305	P	P	P	11.0133	10.9826	11.0393	P	P	P	CUST_89487_PI430048170	0	Noncoding	CAAATGTGTAACAATTAGACCAAAAGGCATCCAGCTAGCACGTGGAGAACGTAATTAAGA	lncipedia	chr3	+	31269006	31269406
CUST_84524_PI430048170	0.0011897	2.93296	6.74928	6.44571	6.57693	P	P	P	4.83666	5.2847	4.97242	P	P	P	CUST_84524_PI430048170	0	Noncoding	GATTCATGCCTATCTTACTTACCTGCAAAGCCATCACAGATTCTCTCTGCTTTCCTTTAA	lncipedia	chr1	+	89599280	89599497
CUST_101837_PI430048170	0.00484233	2.10078	7.76019	7.52527	7.95722	P	P	P	6.64774	6.59633	6.80939	P	P	P	CUST_101837_PI430048170	0	Noncoding	TGAAAGGGAATTCTATCCTGAGGCATTCTTTTCAAGTATTTGAACTCATACTAATGGTCA	lncipedia	chr18	-	23533201	23534560
CUST_115967_PI430048170	0.0198139	2.28861	7.48948	7.68083	7.03576	P	P	P	6.33296	6.18245	6.17532	P	P	P	CUST_115967_PI430048170	0	Noncoding	GAAGAAGGAGGAACAGCTGAAGCTTCTCACGGAGAAATATGGTTGTCAAGATAGATCCAC	lncipedia	chr17	+	60513189	60513550
CUST_89274_PI430048170	0.0134225	3.35966	6.01938	5.68309	5.76329	P	P	P	3.49485	4.26033	4.34549	A	P	A	CUST_89274_PI430048170	0	Noncoding	CACAGGTTCTTCCAAACATGAAGCAAACAAGAGAATACTGTTTGACTCGAAGTAATATTT	lncipedia	chr2	-	215367678	215370520
CUST_108509_PI430048170	0.000171399	2.6134	6.74044	6.71392	6.89227	P	P	P	5.46908	5.46625	5.24916	P	P	P	CUST_108509_PI430048170	0	Noncoding	AATGTAATCCTCCAGTGTGACTCACAGGTGGCATTTGATGGCTTCAGTCTGTGTAAGGAA	lncipedia	chr19	+	54631261	54632055
CUST_108832_PI430048170	0.0170867	4.48498	4.59722	4.68289	4.64404	P	P	P	2.13816	3.01017	2.08413	A	A	A	CUST_108832_PI430048170	0	Noncoding	TGTTTTCTAGGTGAAAGGCGCATCTCAACACTGATCAGACTCAGCAATTCCATTCTGCAT	lncipedia	chr9	-	97153226	97161948
CUST_112015_PI430048170	0.00475012	2.07836	10.834	10.3686	10.6361	P	P	P	9.3473	9.54318	9.78579	P	P	P	CUST_112015_PI430048170	0	Noncoding	ACACGATTATGTACTCAGCAGTAAAAATTGGCGCAAATATATTTATGCATTTGGGTCAGA	lncipedia	chr8	-	130152604	130160063
CUST_13735_PI430048170	7.36454e-05	2.63441	5.66965	5.72771	5.57096	P	P	P	4.19036	4.37509	4.20745	A	P	A	CUST_13735_PI430048170	0	Noncoding	TTGTGTCCAGGGCAGTGTTTATAAACCTGGAACCCATAGTCACTGATGAAGTTTGCACTG	ENSEMBL_GENCODE	chr2	-	153421685	153449818
CUST_11632_PI430048170	0.00122895	2.36434	8.43894	8.50678	8.56539	P	P	P	7.10739	7.27905	7.38925	P	P	P	CUST_11632_PI430048170	0	Noncoding	TAAAATTCCATGTGATCTAAAATTCCATCATTCTATCATGAGCCCAGGAGCTCCTGCTAC	ENSEMBL_GENCODE	chr1	-	158197922	158203877
CUST_67617_PI430048170	0.020411	2.30493	8.28839	8.31218	7.6929	P	P	P	7.04399	6.84505	6.86275	P	P	P	CUST_67617_PI430048170	0	Noncoding	AGTTTGTGGAGTTTGACATGAAGCCCGTGTGTAAGAACTTCCCACTGGAACTGAAGAAGA	lncipedia	chr4	-	36065059	36065726
CUST_73632_PI430048170	0.0111367	2.35199	5.02276	5.10486	4.62498	P	P	P	3.95458	3.25483	3.79646	A	A	A	CUST_73632_PI430048170	0	Noncoding	TGAACCCTTTAGCATACAAACAGTAACAGTGCCTGGATAAAGCCACAAAAGAAGTTAGTG	lncipedia	chr3	-	151759746	151762011
CUST_114234_PI430048170	0.0361362	2.23367	8.58033	8.74157	7.9777	P	P	P	7.39265	7.243	7.28836	P	P	P	CUST_114234_PI430048170	0	Noncoding	ACACAATGATTCCTGGCAGCAAACCAAACAAAAGCAGAGTAATCTGGGGAAAGGTAACCC	lncipedia	chr6	-	136973929	136974217
CUST_62005_PI430048170	0.0184775	2.39987	8.15919	8.27857	7.49484	P	P	P	6.67673	7.01936	6.51784	P	P	P	CUST_62005_PI430048170	0	Noncoding	CAAAGCACGAGAAAAAACTTTTAAAACACCAAAAGGACCTAGCTCTGTAGAAGACATTAA	lncipedia	chr15	-	62082449	62083305
CUST_99113_PI430048170	0.0178938	5.39281	5.81833	6.06889	4.83485	P	P	P	3.26889	3.00859	3.39463	A	A	A	CUST_99113_PI430048170	0	Noncoding	GGAGCTTTCTAAATATGTACAGATTCTGTGATAATCTGTGGACTTTCGTATTGAATGATG	lncipedia	chr8	-	30331960	30332277
CUST_28866_PI430048170	0.00232118	0.416842	4.14904	4.16531	4.33725	A	A	A	5.52888	5.25123	5.63923	P	P	P	CUST_28866_PI430048170	0	Noncoding	AAACCACAGTGACACGTGGATAAAACTCACGTTGTTGGGGGGAGAAGAGCAAAACATATG	RefSeq	chr16	-	14009275	14016018
CUST_76087_PI430048170	0.0483129	2.19484	8.60134	8.77919	7.92753	P	P	P	7.41163	7.36411	7.25771	P	P	P	CUST_76087_PI430048170	0	Noncoding	ATGCCATGGAGTTGCTTGAGGTTTCTAAGGACAACTGGGCCCTCAAGTTCATCAAGAAAA	lncipedia	chr5	+	140609084	140609400
CUST_83135_PI430048170	0.00789385	2.09666	9.7483	9.80281	9.45759	P	P	P	8.64268	8.61787	8.56612	P	P	P	CUST_83135_PI430048170	0	Noncoding	TAACTAGTACATTGATGCTGTTGTGTGCCATGTGCTGCTCAGATAGGGTTTTCTGGGCAT	lncipedia	chr16	+	78825280	78826006
CUST_80296_PI430048170	0.00068052	2.01379	8.11223	7.84556	7.95055	P	P	P	6.83008	6.97816	7.07264	P	P	P	CUST_80296_PI430048170	0	Noncoding	CAAGTCCTGCTTCCTTTTGTAGGTTTAAGACATTAGTTCCTGAGAAATTGACTAATCAAG	lncRNAdb	chr8	NA	133054959	133057767
CUST_117472_PI430048170	0.0296283	2.6216	7.05482	7.00773	6.28101	P	P	P	5.44452	5.4971	5.34889	P	P	P	CUST_117472_PI430048170	0	Noncoding	TTGCACGTAGTTGCTAAGAGAGTTATGAATTCCGTTACTTCCAAATTAACCAGGATGAAG	lncipedia	chrX	-	82506433	82506812
CUST_12966_PI430048170	0.00153318	3.30067	9.17466	8.6068	8.94833	P	P	P	6.97386	7.18467	7.42357	P	P	P	CUST_12966_PI430048170	0	Noncoding	TACCGTGGGTTTACCATGTGCCAAATGCAGAGCTACAAAAGGAAAAATGAAAAAGAAAAG	ENSEMBL_GENCODE	chr2	-	65373700	65380685
CUST_118397_PI430048170	0.037134	2.06772	11.2068	11.1386	10.5382	P	P	P	9.98156	9.97875	9.8651	P	P	P	CUST_118397_PI430048170	0	Noncoding	CAAGTTCTACTCAGTAATTGTGGATTACAGCAAACTGAAGAAAGAAGGTCCAGATTTCTA	NONCODE	chr1	-	89661211	89661353
CUST_66664_PI430048170	0.033608	2.33961	6.94093	7.00913	6.28754	P	P	P	5.91211	5.66659	4.90442	P	P	P	CUST_66664_PI430048170	0	Noncoding	GGTAGGTGAATTTTCTGGAGCTATAATAATAAGGAAAATCTTGAAGCCACCACTAATGAA	lncipedia	chr2	-	149068595	149068910
CUST_16211_PI430048170	0.015458	0.246	3.07133	3.82682	2.63144	A	A	A	5.14963	5.56358	5.09804	P	P	P	CUST_16211_PI430048170	0	Noncoding	TTAAAGTTCATCATAGGACATCTACAATTTGCAAAGCAGGTGACTGGATATGGACTCCTT	RefSeq	chr4	+	78645993	78684501
CUST_84286_PI430048170	0.0144045	7.85407	5.96335	6.0255	6.01744	P	P	P	3.30983	3.32109	2.19385	A	A	A	CUST_84286_PI430048170	0	Noncoding	TGACCAGATGGGCTTCTCTTGTCACCATAACATTATGTATTAGGACTTCATGTATTATGT	RefSeq	chr20	+	9986332	10007116
CUST_81053_PI430048170	0.0382077	0.462493	4.43725	4.85465	3.86374	P	A	A	5.91569	5.48477	5.15915	P	P	P	CUST_81053_PI430048170	0	Noncoding	TCTAGAGGGTGAGGTATGTCATTTACATGAAGGTTAAGAATAAAACAGAAAGTGCCTCTA	lncipedia	chr9	+	95018890	95022280
CUST_83419_PI430048170	0.0130187	2.28759	6.74104	6.93494	6.24334	P	P	P	5.10878	5.50097	5.74344	P	P	P	CUST_83419_PI430048170	0	Noncoding	GTGGGAAAGAAATTGGTTGTAGAAAGAAGAAGGTGGTTCACAGAACAGCTACAGCAGATG	lncipedia	chr17	-	6322412	6323228
CUST_124623_PI430048170	0.00259615	2.78597	9.0708	9.1051	8.62817	P	P	P	7.53285	7.58722	7.2782	P	P	P	CUST_124623_PI430048170	0	Noncoding	GGACTTCATGTTATTATTGGATCAACAATTCTCACCATCTGCCTTCTTGCCAATTAAAAT	lncipedia	chr6	-	32706123	32706955
CUST_16455_PI430048170	0.000360885	7.59347	10.2031	10.3706	10.3705	P	P	P	7.39486	7.39205	7.38927	P	P	P	CUST_16455_PI430048170	0	Noncoding	GTTTCCTCAGTGCTTTGAAGATTTTTCTAAAGTCATCTGACTTGGTTTCCCTTTGATTTC	ENSEMBL_GENCODE	chr4	-	128567972	128570531
CUST_2486_PI430048170	0.00333306	5.5353	7.98308	8.26082	8.087	P	P	P	5.59642	5.25005	5.99565	P	P	P	CUST_2486_PI430048170	0	Noncoding	GTCGGGCCATACTTTAACTTGGTTTATGGAAATGAATCCATTTCAAGATTCATCAAATCA	RefSeq	chr9	+	123368778	123380335
CUST_60767_PI430048170	0.013835	2.89427	5.32819	5.58163	6.23065	P	P	P	4.15283	3.95738	4.52675	A	A	A	CUST_60767_PI430048170	0	Noncoding	CCAGATTTTCTTGTTGTTACAAGGGAAAATTGTCCTGGTTCCTTCTTGAAACTAGTGAGG	lncipedia	chr14	-	31203070	31207709
CUST_20222_PI430048170	0.00332851	2.06665	6.36839	6.25663	6.26098	P	P	P	5.23121	5.08804	5.40961	P	P	P	CUST_20222_PI430048170	0	Noncoding	GCTTCTGCTTATAAGTCAACCTCAAGGGAGTTTTATTTTGTCCCTGGATGATTCCTCAGT	ENSEMBL_GENCODE	chr7	-	130884109	130913197
CUST_63339_PI430048170	0.0006253	2.6539	8.54182	8.79784	8.53419	P	P	P	7.01797	7.23912	7.3849	P	P	P	CUST_63339_PI430048170	0	Noncoding	CCCATTAACAAATTATGGCTTCTGCTTGCTGGAAATGAAGTATAGTTTAAGACCAAACAT	lncipedia	chr17	+	64956549	64957253
[truncated: 48 more rows]
