# Supplementary figures and images for: The NR_109/FUBP1/c-Myc axis regulates TAM polarization and remodels the tumor microenvironment to promote cancer development
Source: HighWire-hosted journal article supplement (doi:10.1136/jitc-2022-006230), 2023-05-01

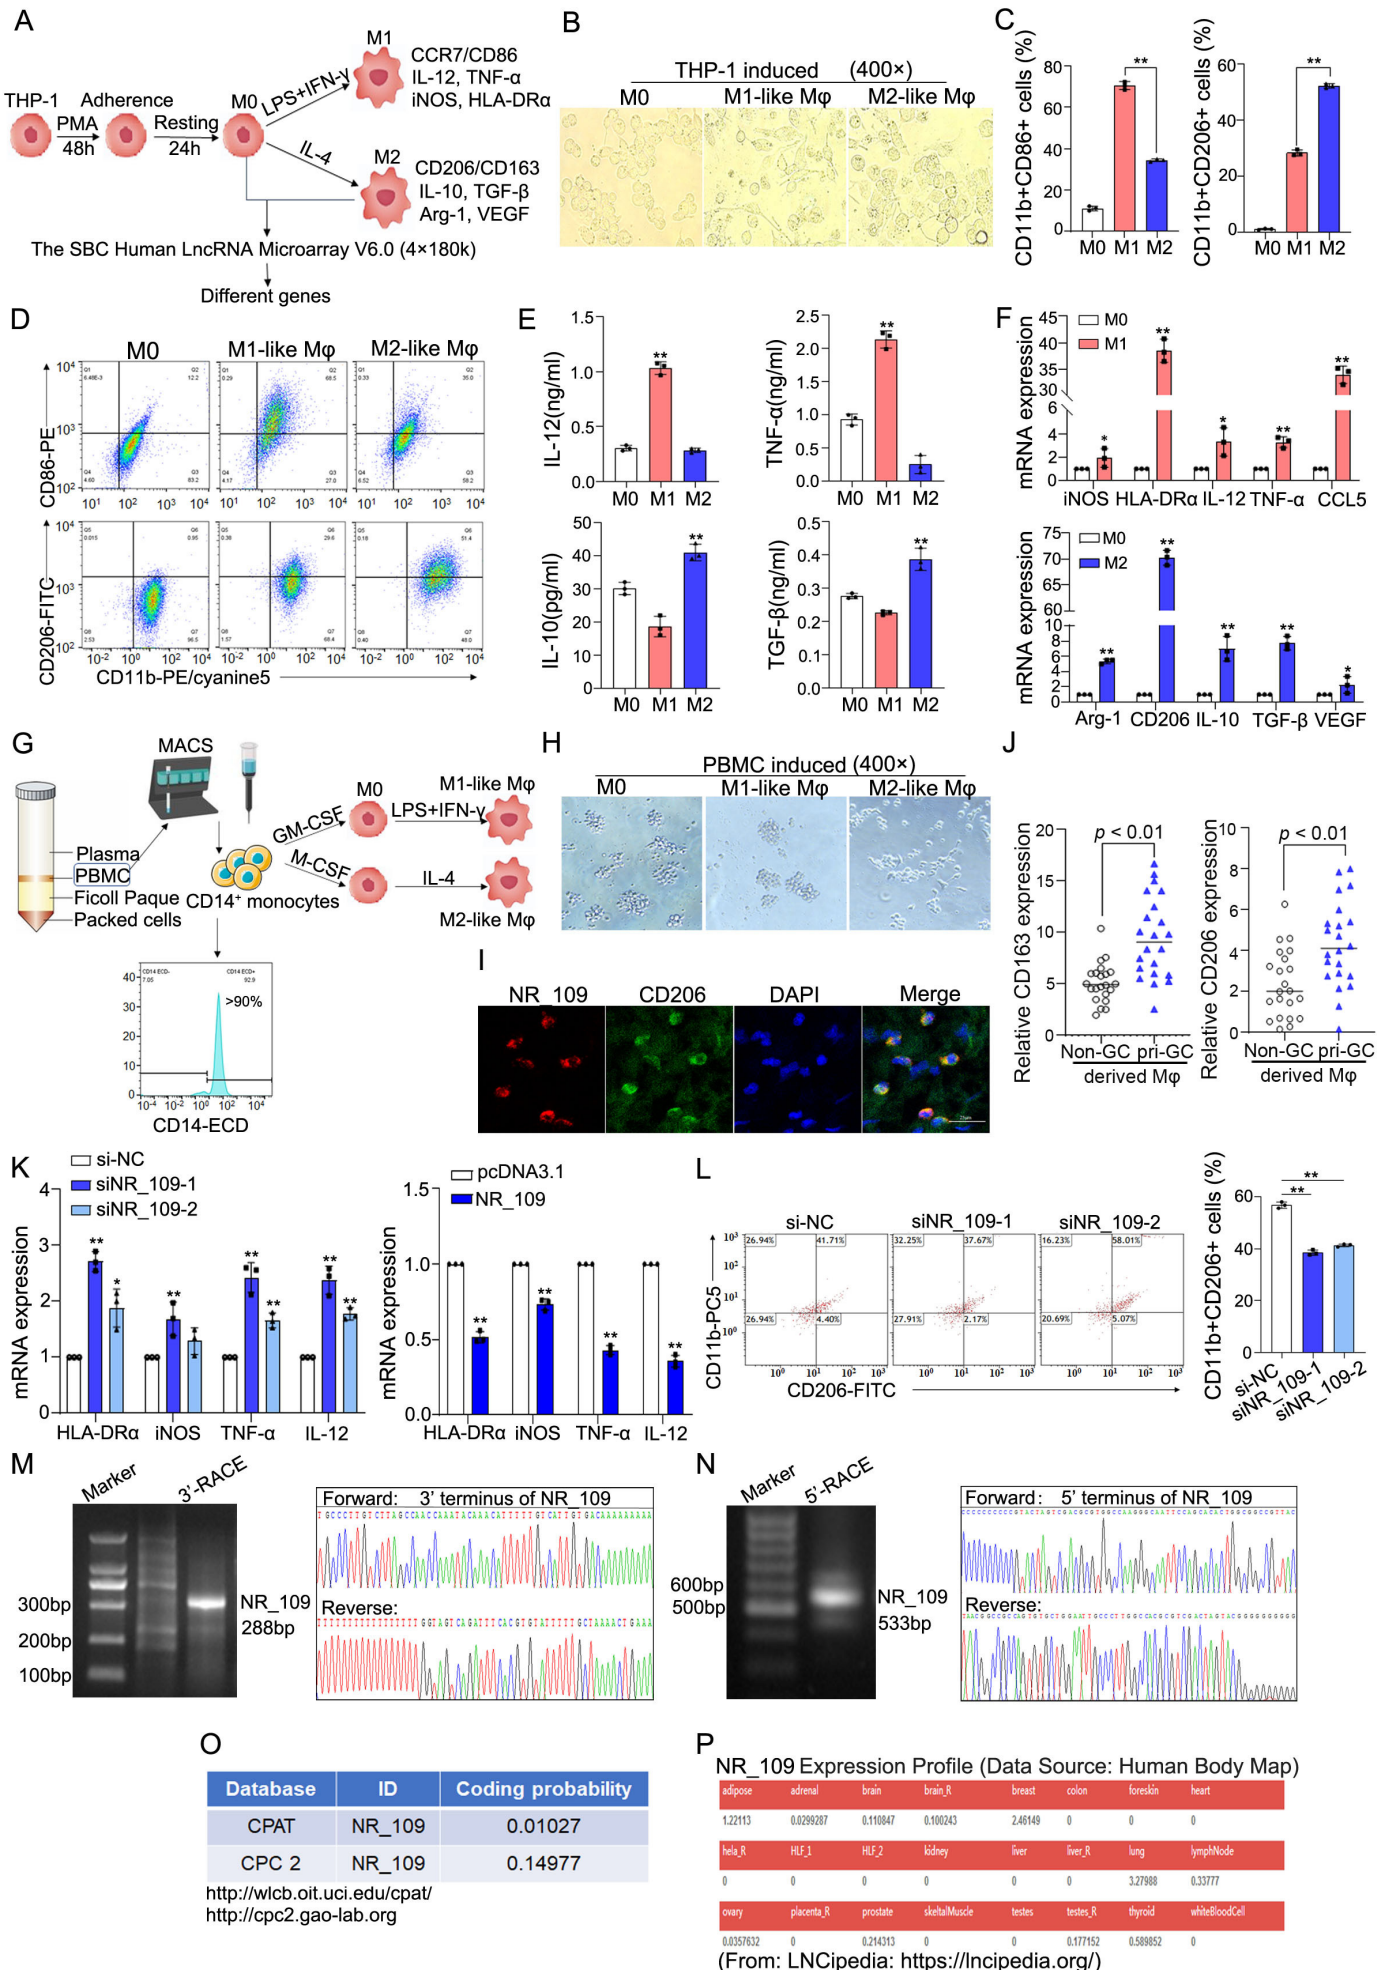

Supplement: jitc-2022-006230supp003_data_supplement.pdf [file jitc-2022-006230supp003_data_supplement.pdf]

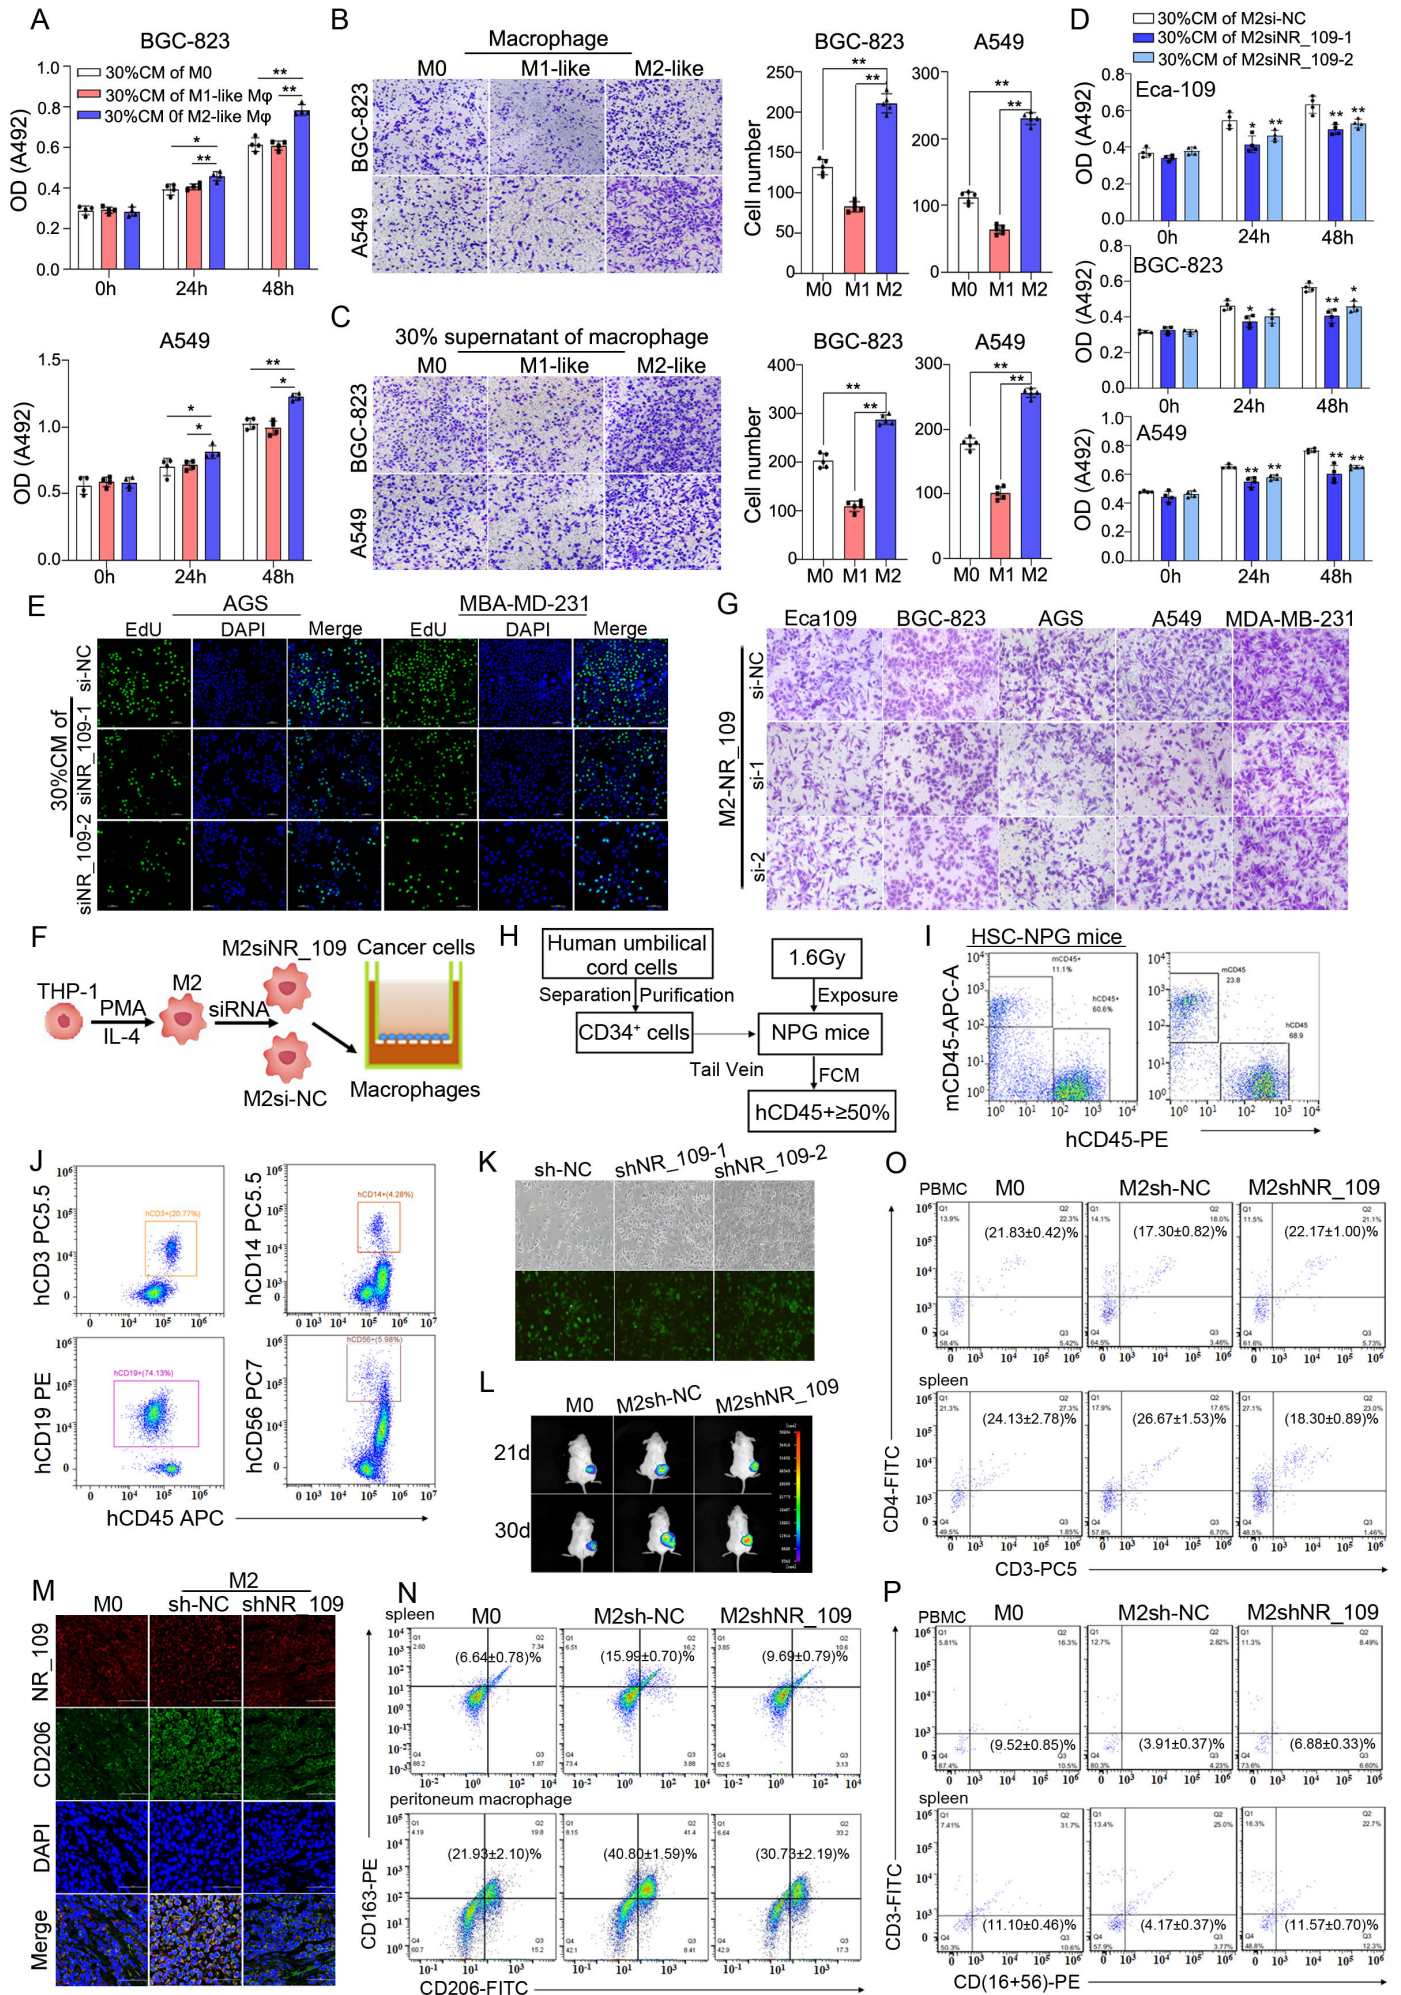

Supplement: jitc-2022-006230supp004_data_supplement.pdf [file jitc-2022-006230supp004_data_supplement.pdf]

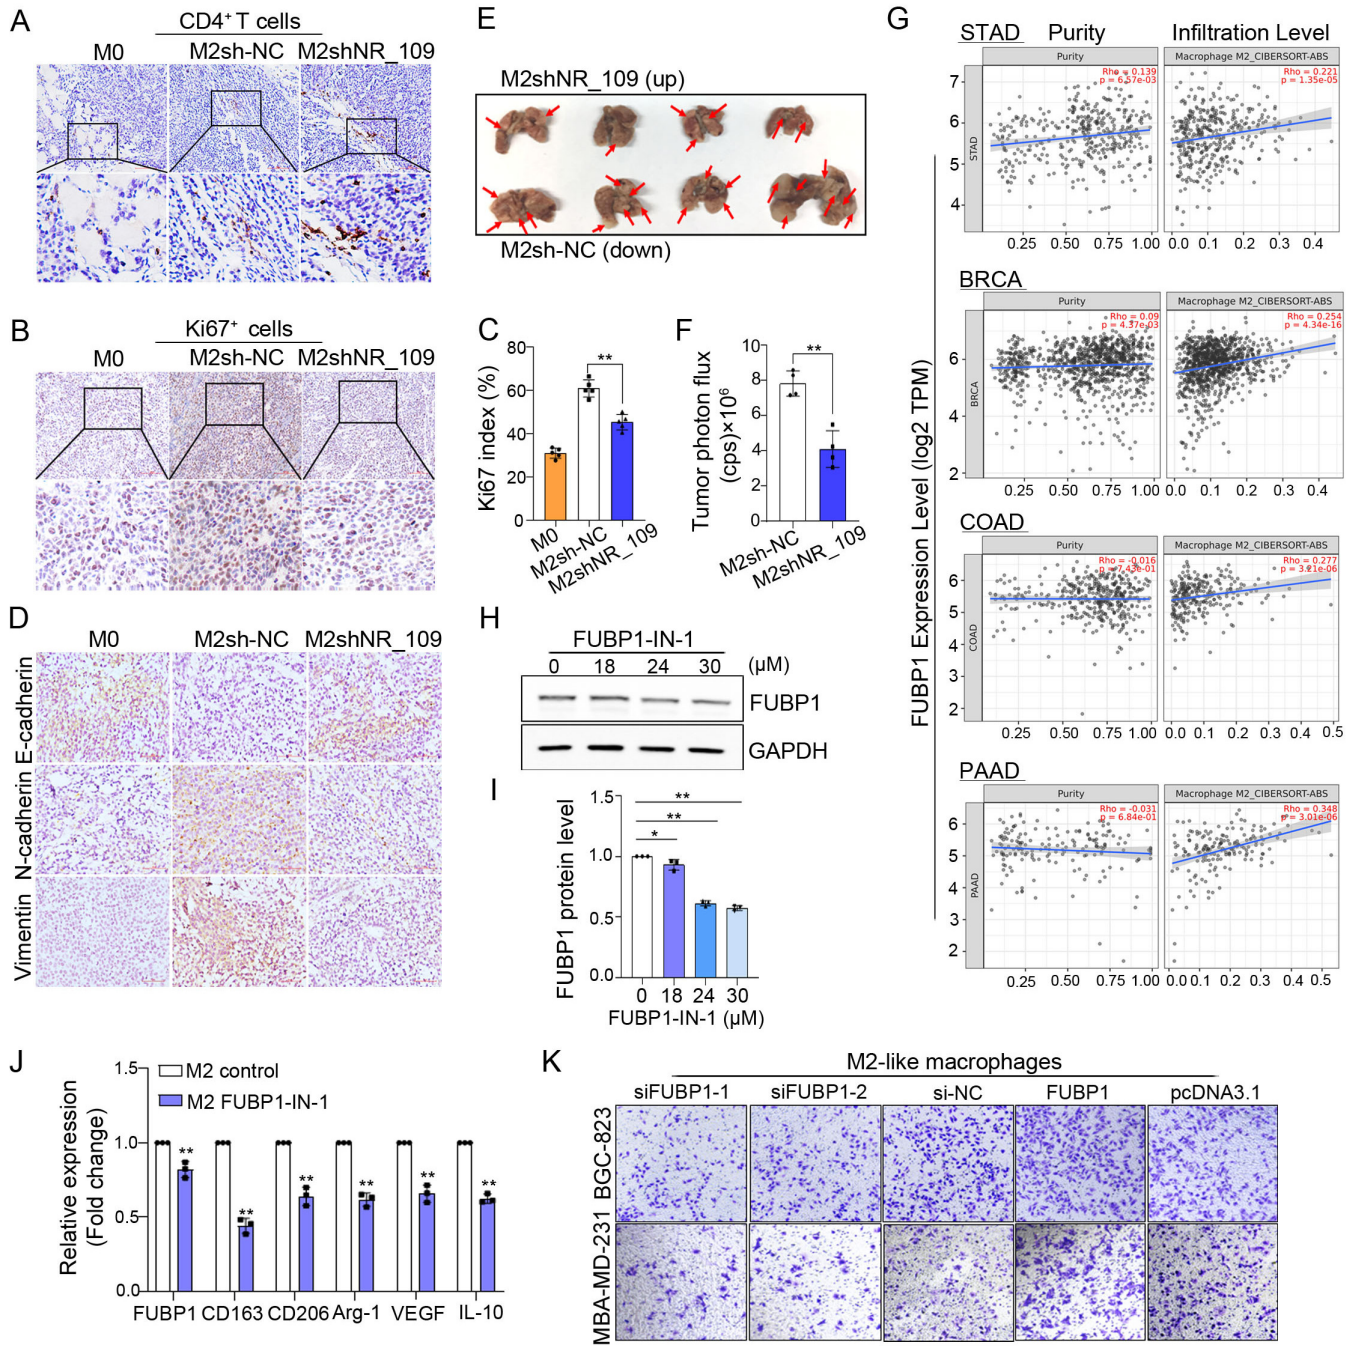

Supplement: jitc-2022-006230supp005_data_supplement.pdf [file jitc-2022-006230supp005_data_supplement.pdf]

**A** Gastric cancer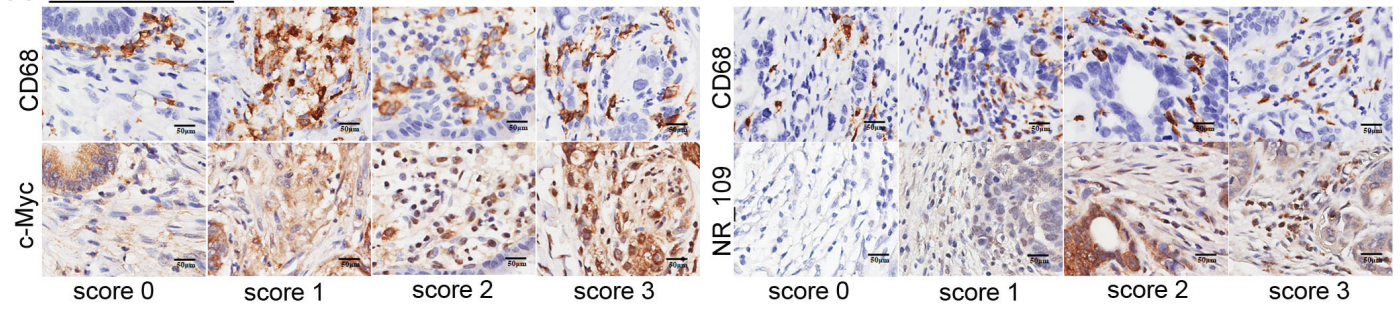Breast cancer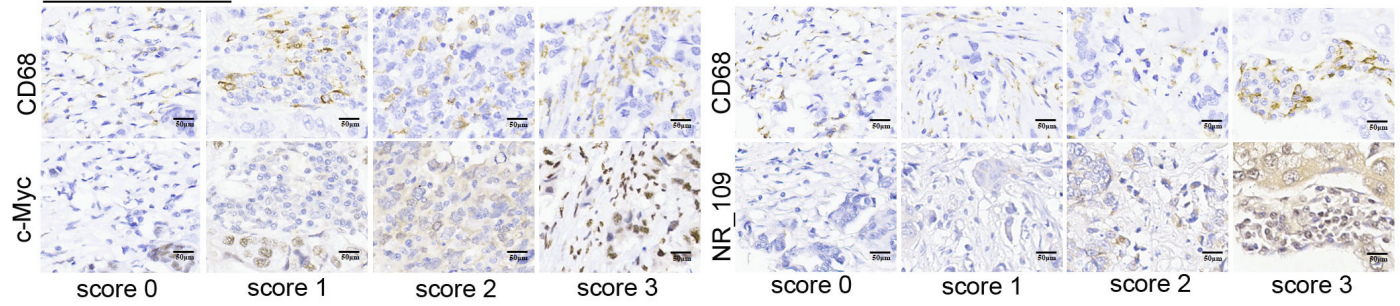Lung cancer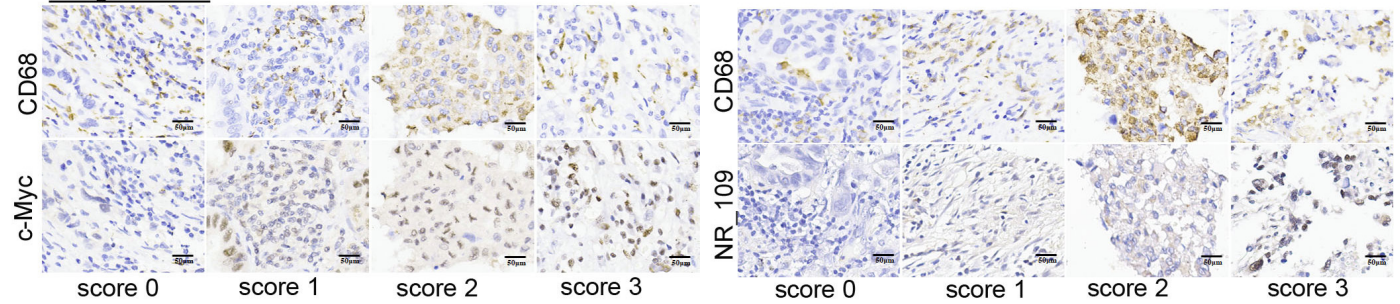

Supplement: jitc-2022-006230supp008_data_supplement.pdf [file jitc-2022-006230supp008_data_supplement.pdf]
