# Supplementary figures and images for: The NR_109/FUBP1/c-Myc axis regulates TAM polarization and remodels the tumor microenvironment to promote cancer development
Source: PubMed Central journal article supplement — J Immunother Cancer. 2023 May 22;11(5):e006230. doi: 10.1136/jitc-2022-006230 (PMC10230994; doi:10.1136/jitc-2022-006230), 2023-05-22

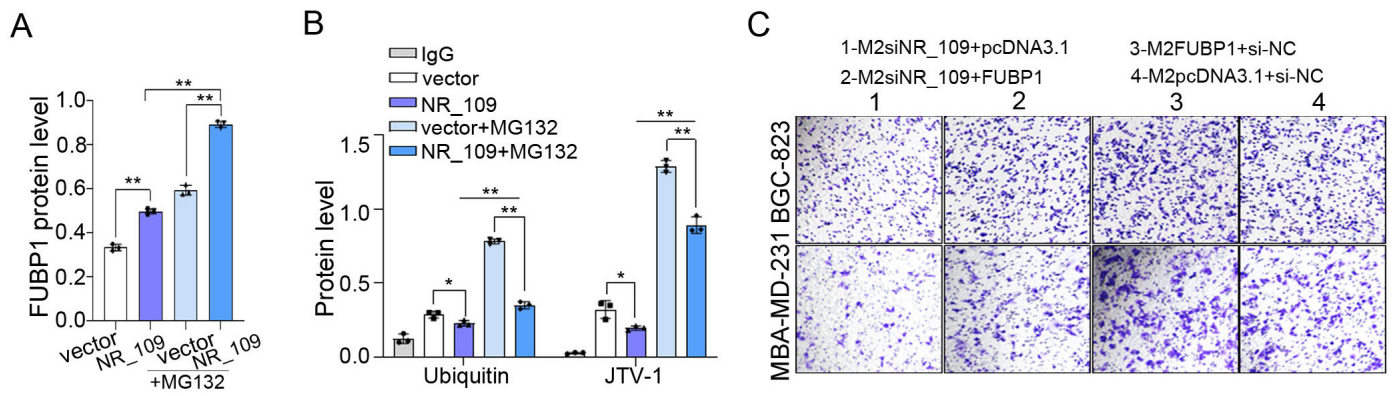

Supplement: jitc-2022-006230supp006.pdf [file jitc-2022-006230supp006.pdf]

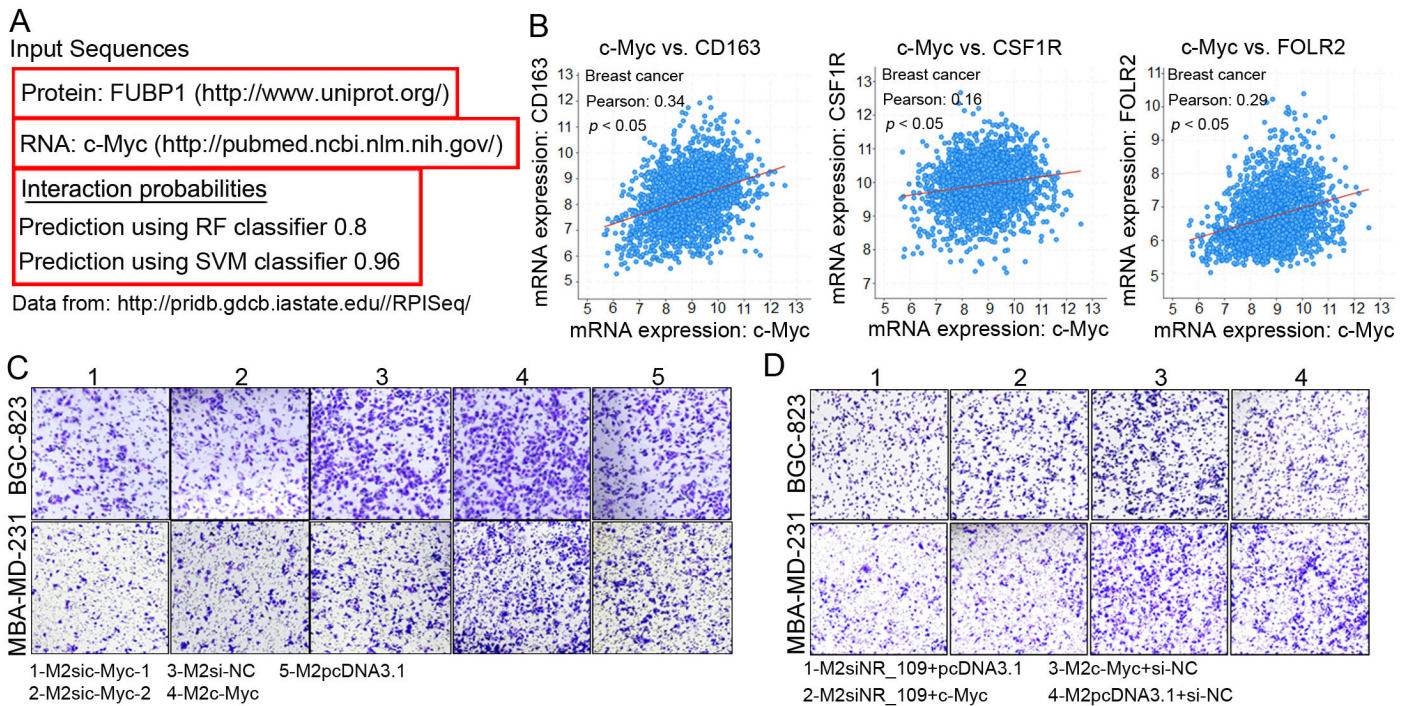

Supplement: jitc-2022-006230supp007.pdf [file jitc-2022-006230supp007.pdf]
